# Supplementary material for: Magnesium hydride alkene insertion and catalytic hydrosilylation
Source: PubMed Central journal article supplement (PMC6839609; doi:10.1039/c9sc02056j), 2019-07-22
Supplement: SC-010-C9SC02056J-s001.pdf [file SC-010-C9SC02056J-s001.pdf]

**Supplementary Information for**

**Magnesium hydride alkene insertion and catalytic hydrosilylation**

Lucia Garcia,<sup>a</sup> Chiara Dinoi,<sup>b</sup> Mary F. Mahon,<sup>a</sup> Laurent Maron<sup>b\*</sup> and Michael S. Hill<sup>a</sup>

<sup>a</sup>*Department of Chemistry, University of Bath, Claverton Down, Bath, BA2 7AY, UK.* <sup>b</sup>*Université de Toulouse et CNRS, INSA, UPS, UMR 5215, LPCNO, 135 Avenue de Rangueil, F-31077 Toulouse, France*

## General considerations and starting materials

All manipulations were carried out using standard Schlenk line and glovebox techniques under an inert atmosphere of argon. NMR experiments were conducted in J. Young tap NMR tubes prepared and sealed in a Glovebox. NMR spectra were collected on a Bruker AV300 spectrometer operating at 300.2 MHz ( $^1\text{H}$ ) and 75.5 MHz ( $^{13}\text{C}$ ) or an Agilent ProPulse spectrometer operating at 500 MHz ( $^1\text{H}$ ) and 126 MHz ( $^{13}\text{C}$ ). The spectra were referenced relative to residual protio solvent resonances.  $\text{C}_6\text{D}_6$  was purchased from Sigma-Aldrich Corp., dried over a potassium mirror before distilling under argon and storing over molecular sieves in the glovebox. Phenylsilane (97%), allyltriphenylsilane (98%) and allyltrimethylsilane (98%) were purchased from Sigma-Aldrich Corp. and used without further purification. Diphenylacetylene (98%) and *trans*-stilbene (96%) were purchased from Sigma-Aldrich Corp., recrystallised from ethanol and dried under high vacuum. Liquid alkenes: 1,1-diphenylethene (97%), 3,3-dimethyl-1-butene (97%), 1-hexene (97%), 1,5-hexadiene (97%), 1-octene (98%), 1,7-octadiene (98%), allylbenzene (98%) and styrene (99%) were purchased from Sigma-Aldrich Corp., dried over calcium hydride and distilled under argon before use. Compound **4**,  $[(\text{BDI})\text{MgH}]_2$ , ( $\text{BDI} = \text{HC}\{(\text{Me})\text{CN}-2,6\text{-}i\text{Pr}_2\text{C}_6\text{H}_3\}_2$ ) was synthesised by a literature procedure.<sup>1</sup> Microanalysis was performed by Mr. S. Boyer of London Metropolitan Enterprises.

## Synthesis, spectroscopic and analytical data for new compounds

### $[(\text{BDI})\text{Mg}\{(\text{CH}_2)_5\text{CH}_3\}]$ (**6**)

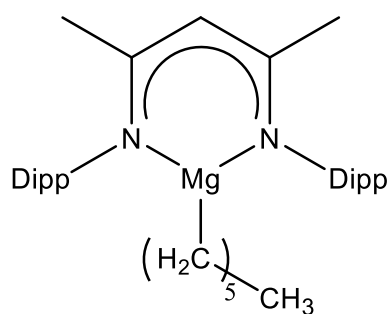

In a sealed J. Young NMR tube,  $[(\text{BDI})\text{MgH}]_2$  (20 mg, 0.024 mmol) and 1-hexene (6  $\mu\text{L}$ , 0.048 mmol) were dissolved in  $\text{C}_6\text{D}_6$  (0.5 mL). After heating the resulting colourless solution at 80  $^\circ\text{C}$  for 4 hours, the solvent was removed under vacuum. Yield: 24 mg, 95%.  $^1\text{H}$  NMR (500 MHz,  $\text{C}_6\text{D}_6$ , 298K):  $\delta$  7.17 – 7.14 (6H, CH Dipp), 4.94 (s, 1H,  $\text{CH}\{\text{C}(\text{CH}_3)\text{NDipp}\}_2$ ), 3.16 (sept,  $^3J_{\text{HH}} = 6.9$  Hz, 4H,  $\text{CH}(\text{CH}_3)_2$ ), 1.67 (s, 6H,  $\text{CH}\{\text{C}(\text{CH}_3)\text{NDipp}\}_2$ ), 1.41 – 1.29 (4H,  $\text{CH}_2$ ), 1.28 (d,  $^3J_{\text{HH}} = 6.9$  Hz, 12H,  $\text{CH}(\text{CH}_3)_2$ ), 1.16 (d,  $^3J_{\text{HH}} = 6.9$  Hz, 12H,  $\text{CH}(\text{CH}_3)_2$ ), 1.04 – 0.93 (4H,  $\text{CH}_2$ ), 0.91 – 0.85 (m, 3H,  $\text{CH}_3$ ), -0.22 – -0.27 ppm (m, 2H,  $\text{MgCH}_2$ ).  $^{13}\text{C}\{^1\text{H}\}$  NMR (125.8 MHz,  $\text{C}_6\text{D}_6$ , 298K):  $\delta$  169.3 (s,  $\text{NC}(\text{Me})$ ), 143.9 (s,  $\text{NC Dipp}$ ), 141.9 (s,  $\text{C-}^i\text{Pr}$ ), 126.0 (*p*-CH Dipp), 124.1 (*m*-CH Dipp), 95.4 (s,  $\text{CH}\{\text{C}(\text{Me})\text{NDipp}\}_2$ ), 38.1 (s,  $\text{CH}_2$ ), 32.4 (s,  $\text{CH}_2$ ), 28.8 (s,  $\text{MgCH}_2\text{CH}_2$ ), 28.7 (s,  $\text{CH}(\text{CH}_3)_2$  Dipp), 24.7 (s,  $\text{C-CH}_3$  Dipp), 24.5 (s,  $\text{CH}_3$ ), 23.6 (s,  $\text{CH}\{\text{C}(\text{CH}_3)\text{NDipp}\}_2$ ), 23.5 (s,  $\text{C-CH}_3$  Dipp), 14.6 (s,  $\text{CH}_2$ ), 5.9 ppm (s,  $\text{Mg-CH}_2$ ). Elemental analysis (%). Found: C 78.87, H 10.56, N 5.05. Calculated for  $\text{C}_{35}\text{H}_{54}\text{N}_2\text{Mg}$ : C 79.75, H 10.33, N 5.31.

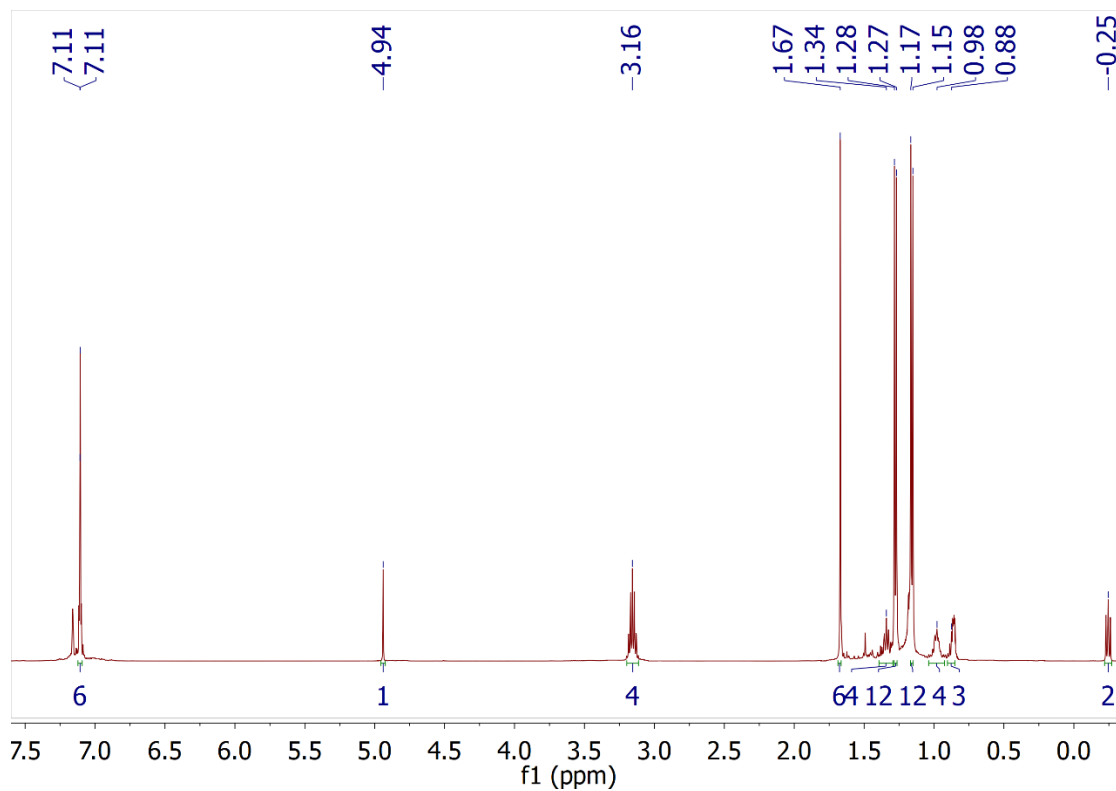

**Figure S1.**  $^1\text{H}$  NMR spectrum (500 MHz,  $\text{C}_6\text{D}_6$ , 298K) of compound **6**.

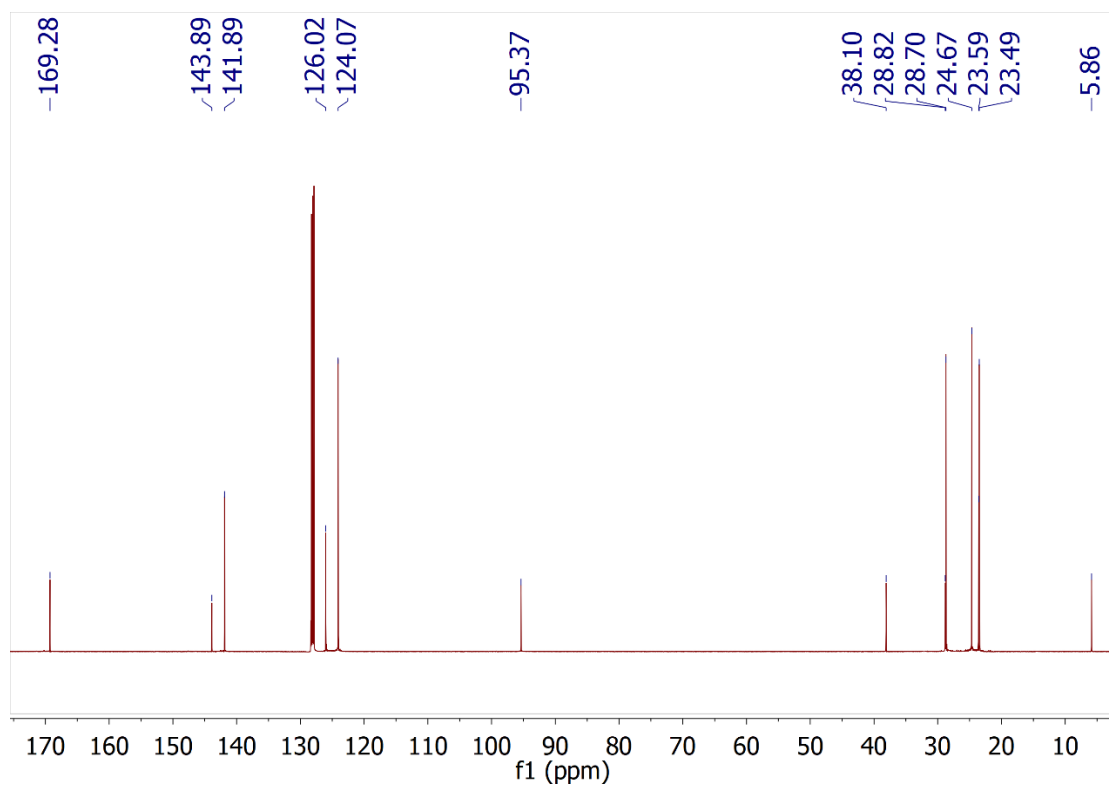

**Figure S2.**  $^{13}\text{C}\{^1\text{H}\}$  NMR spectrum (125.8 MHz,  $\text{C}_6\text{D}_6$ , 298K) of compound **6**.

**[(BDI)Mg{(CH<sub>2</sub>)<sub>7</sub>CH<sub>3</sub>}] (7)**

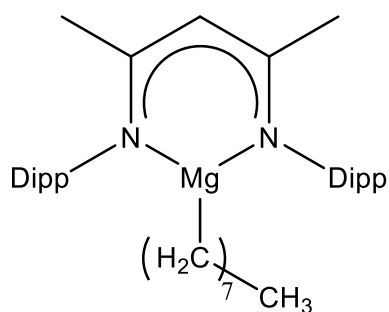

In a sealed J. Young NMR tube, 1-octene (7.7  $\mu\text{L}$ , 0.048 mmol) was added to a  $\text{C}_6\text{D}_6$  (0.5 mL) solution of  $[(\text{BDI})\text{MgH}]_2$  (20 mg, 0.024 mmol). The colourless solution was heated for 4 hours at 80  $^\circ\text{C}$  and then evaporated to dryness in vacuo. Yield: 27 mg, 96%.  $^1\text{H}$  NMR (500 MHz,  $\text{C}_6\text{D}_6$ , 298K):  $\delta$  7.14 – 7.10 (6H, CH Dipp), 4.95 (s, 1H, CH{C(CH<sub>3</sub>)NDipp}<sub>2</sub>), 3.17 (sept,  $^3J_{\text{HH}} = 6.9$  Hz, 4H, CH(CH<sub>3</sub>)<sub>2</sub>), 1.67 (s, 6H, CH{C(CH<sub>3</sub>)NDipp}<sub>2</sub>), 1.44 – 1.31 (m, 2H, MgCH<sub>2</sub>CH<sub>2</sub>), 1.29 (d,  $^3J_{\text{HH}} = 6.9$  Hz, 12H, CH(CH<sub>3</sub>)<sub>2</sub>), 1.16 (d,  $^3J_{\text{HH}} = 6.9$  Hz, 12H, CH(CH<sub>3</sub>)<sub>2</sub>), 1.31 – 0.84 (13H, CH<sub>2</sub> and CH<sub>3</sub>), -0.21 ppm (m, 2H, MgCH<sub>2</sub>).  $^{13}\text{C}\{^1\text{H}\}$  NMR (125.8 MHz,  $\text{C}_6\text{D}_6$ , 298K):  $\delta$  169.3 (s, NC(Me)), 143.9 (s, NC Dipp), 141.9 (s, C-<sup>*i*</sup>Pr), 126.0 (*p*-CH Dipp), 124.1 (*m*-CH Dipp), 95.4 (s, CH{C(Me)NDipp}<sub>2</sub>), 38.5 (s, MgCH<sub>2</sub>CH<sub>2</sub>CH<sub>2</sub>), 32.5 – 23.5 (CH<sub>2</sub> and CH<sub>3</sub>), 28.9 (s, MgCHCH<sub>2</sub>), 28.7 (s, CH(CH<sub>3</sub>)<sub>2</sub> Dipp), 24.7 (s, C-CH<sub>3</sub> Dipp), 23.6 (s, CH{C(CH<sub>3</sub>)NDipp}<sub>2</sub>), 23.5 (s, C-CH<sub>3</sub> Dipp), 5.9 ppm (s, Mg-CH<sub>2</sub>). Elemental analysis (%). Found: C 81.56, H 10.98, N 4.91. Calculated for  $\text{C}_{37}\text{H}_{58}\text{MgN}_2$ : C 80.05, H 10.53, N 5.05.

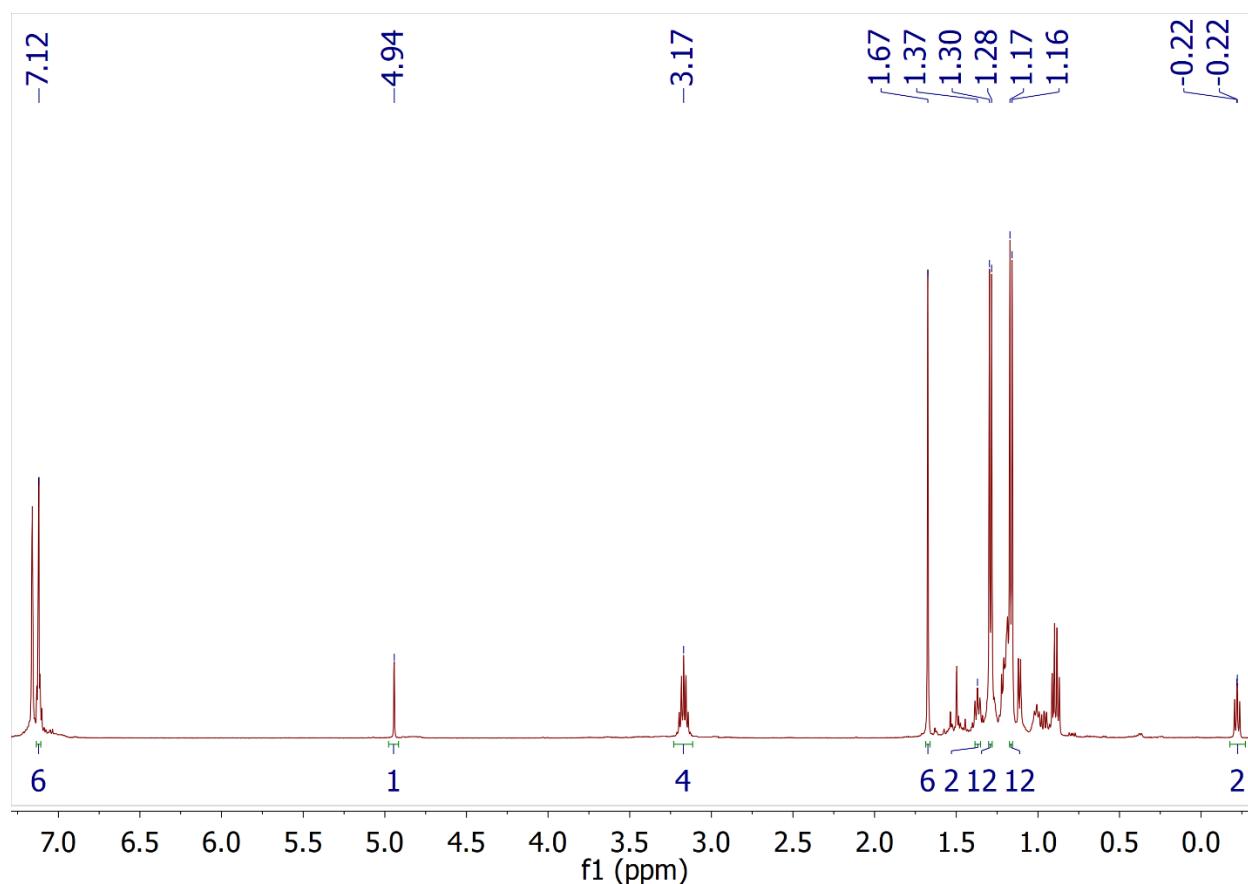

**Figure S3.**  $^1\text{H}$  NMR spectrum (500 MHz,  $\text{C}_6\text{D}_6$ , 298K) of compound 7.

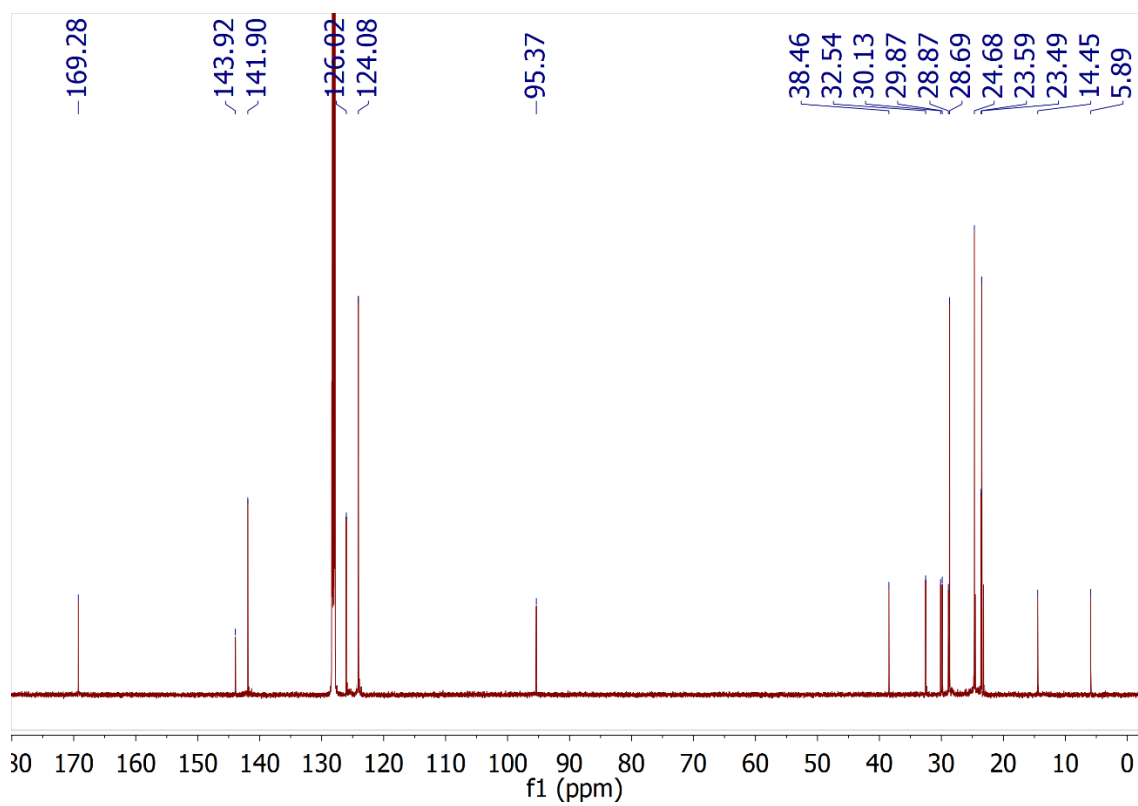

**Figure S4.**  $^{13}\text{C}\{^1\text{H}\}$  NMR spectrum (125.8 MHz,  $\text{C}_6\text{D}_6$ , 298K) of compound 7.

**[(BDI)Mg{(CH<sub>2</sub>)<sub>3</sub>Ph}] (8)**

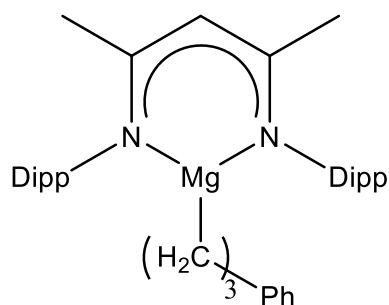

In a sealed J. Young NMR tube, allylbenzene (6.4  $\mu$ L, 0.048 mmol) was added to a C<sub>6</sub>D<sub>6</sub> (0.5 mL) solution of [(BDI)MgH]<sub>2</sub> (20 mg, 0.024 mmol). The colourless solution was heated for 2 days at 80°C and then evaporated to dryness in vacuo. Yield: 25 mg, 92%. <sup>1</sup>H NMR (500 MHz, C<sub>6</sub>D<sub>6</sub>, 298K):  $\delta$  7.12 – 7.08 (6H, CH Dipp), 7.07 – 6.96 (5H, CH Ph), 4.93 (s, 1H, CH{C(CH<sub>3</sub>)NDipp}<sub>2</sub>), 3.14 (sept, <sup>3</sup>J<sub>HH</sub> = 6.9 Hz, 4H, CH(CH<sub>3</sub>)<sub>2</sub>), 2.25 (m, 2H, PhCH<sub>2</sub>), 1.66 (s, 6H, CH{C(CH<sub>3</sub>)NDipp}<sub>2</sub>), 1.64 – 1.57 (m, 2H, MgCH<sub>2</sub>CH<sub>2</sub>), 1.24 (d, <sup>3</sup>J<sub>HH</sub> = 6.9 Hz, 12H, CH(CH<sub>3</sub>)<sub>2</sub>), 1.14 (d, <sup>3</sup>J<sub>HH</sub> = 6.9 Hz, 12H, CH(CH<sub>3</sub>)<sub>2</sub>), -0.21 ppm (m, 2H, MgCH<sub>2</sub>). <sup>13</sup>C{<sup>1</sup>H} NMR (125.8 MHz, C<sub>6</sub>D<sub>6</sub>, 298K):  $\delta$  169.3 (s, NC(Me)), 144.5 (s, C Ph), 143.8 (s, NC Dipp), 141.9 (s, C-<sup>i</sup>Pr), 127.7 (*o*-CH Ph), 126.1 – 125.2 (CH Dipp and Ph), 124.1 (*m*-CH Dipp), 95.4 (s, CH{C(Me)NDipp}<sub>2</sub>), 44.7 (s, MgCH<sub>2</sub>CH<sub>2</sub>CH<sub>2</sub>), 31.1 (s, MgCH<sub>2</sub>CH<sub>2</sub>), 28.7 (s, CH(CH<sub>3</sub>)<sub>2</sub> Dipp), 24.7 (s, C-CH<sub>3</sub> Dipp), 23.5 (s, CH{C(CH<sub>3</sub>)NDipp}<sub>2</sub>), 23.4 (s, C-CH<sub>3</sub> Dipp), 6.0 ppm (s, MgCH<sub>2</sub>). Elemental analysis (%). Found: C 79.99, H 9.33, N 5.16. Calculated for C<sub>38</sub>H<sub>52</sub>MgN<sub>2</sub>: C 80.34, H 9.34, N 4.99.

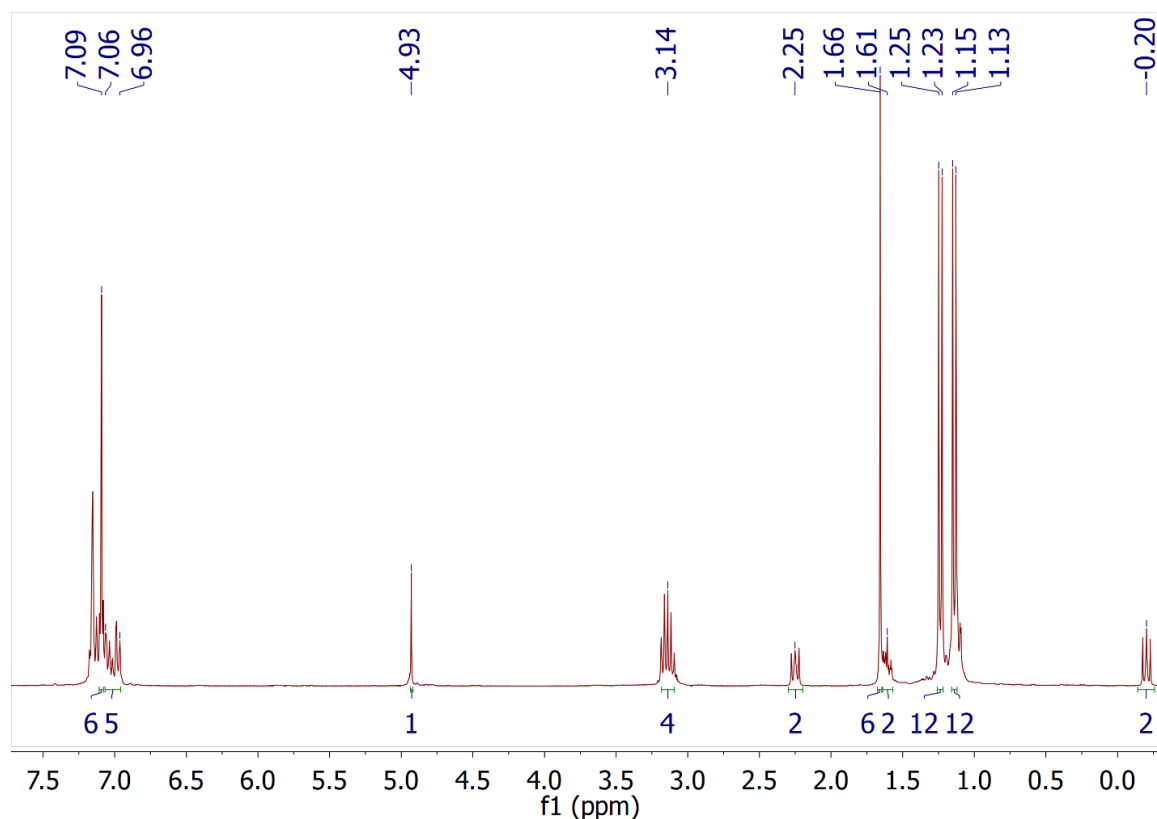

**Figure S5** <sup>1</sup>H NMR spectrum (500 MHz, C<sub>6</sub>D<sub>6</sub>, 298K) of compound **8**.

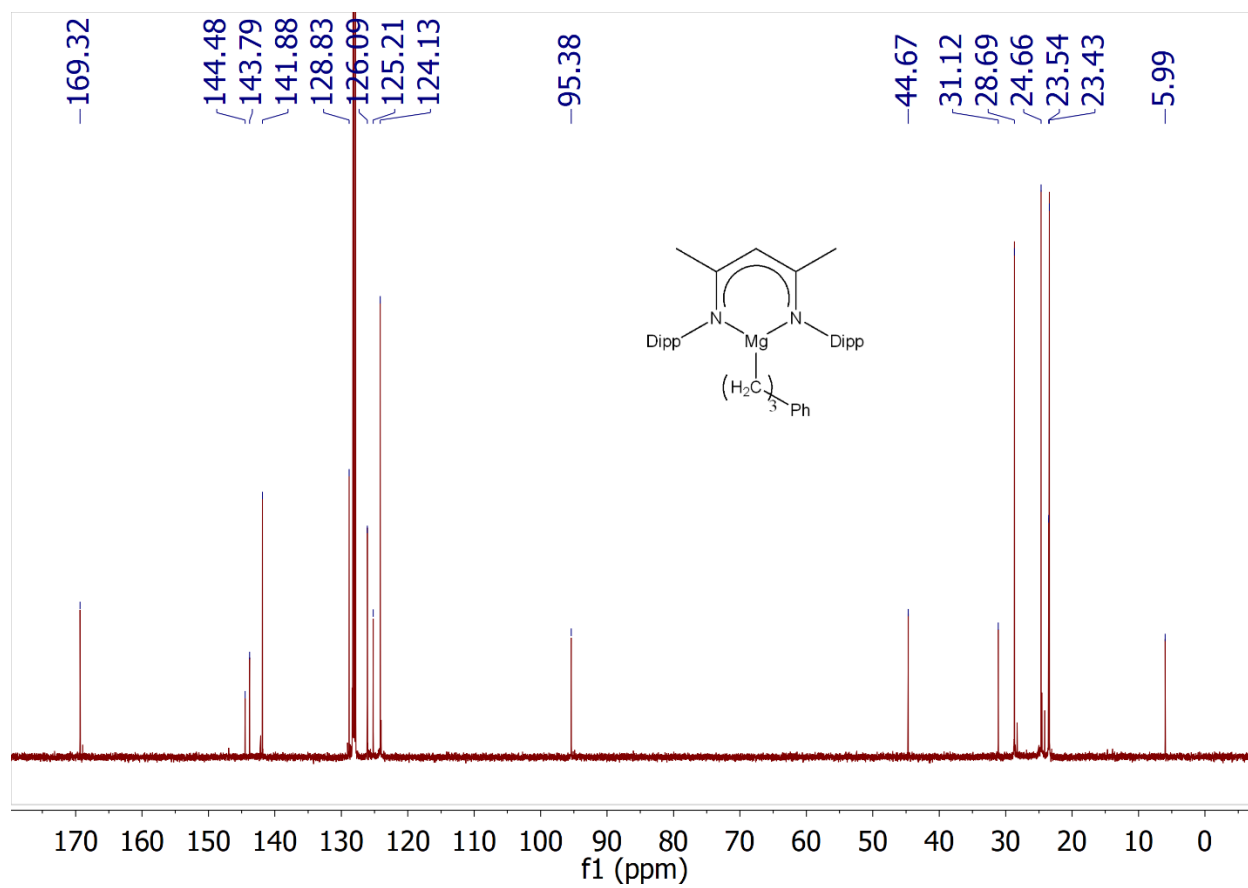

**Figure S6.**  $^{13}\text{C}\{^1\text{H}\}$  NMR spectrum (125.8 MHz,  $\text{C}_6\text{D}_6$ , 298K) of compound **8**.

**[(BDI)Mg{(CH<sub>2</sub>)<sub>2</sub>C(CH<sub>3</sub>)<sub>3</sub>}] (9)**

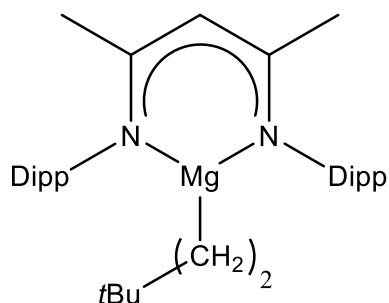

[(BDI)MgH]<sub>2</sub> (20 mg, 0.024 mmol) and 3,3-dimethyl-1-butene (6.0 μL, 0.048 mmol) were dissolved in C<sub>6</sub>D<sub>6</sub> (0.5 mL) in a sealed J. Young NMR tube. After heating the resulting colourless solution at 80 °C for 21 days, the solvent was removed under vacuum. Yield: 25 mg, 91%. <sup>1</sup>H NMR (500 MHz, C<sub>6</sub>D<sub>6</sub>, 298K): δ 7.13 – 7.09 (6H, CH Dipp), 4.94 (s, 1H, CH{C(CH<sub>3</sub>)NDipp}<sub>2</sub>), 3.16 (sept, <sup>3</sup>J<sub>HH</sub> = 6.9 Hz, 4H, CH(CH<sub>3</sub>)<sub>2</sub>), 1.67 (s, 6H, CH{C(CH<sub>3</sub>)NDipp}<sub>2</sub>), 1.29 (d, <sup>3</sup>J<sub>HH</sub> = 6.9 Hz, 12H, CH(CH<sub>3</sub>)<sub>2</sub>), 1.16 (d, <sup>3</sup>J<sub>HH</sub> = 6.9 Hz, 12H, CH(CH<sub>3</sub>)<sub>2</sub>), 0.94 – 0.88 (m, 2H, MgCH<sub>2</sub>CH<sub>2</sub>), 0.79 (s, 9H, C(CH<sub>3</sub>)<sub>3</sub>), -0.44 – -0.48 ppm (m, 2H, MgCH<sub>2</sub>); <sup>13</sup>C{<sup>1</sup>H} NMR (125.8 MHz, C<sub>6</sub>D<sub>6</sub>, 298K): δ 169.3 (s, NC(Me)), 143.8 (s, NC Dipp), 141.9 (s, C-<sup>i</sup>Pr), 126.0 (*p*-CH Dipp), 124.1 (*m*-CH Dipp), 95.3 (s, CH{C(Me)NDipp}<sub>2</sub>), 43.0 (s, MgCHCH<sub>2</sub>), 32.5 (s, MgCH<sub>2</sub>CH<sub>2</sub>C), 28.8 (s, CH(CH<sub>3</sub>)<sub>2</sub> Dipp), 28.7 (s, C(CH<sub>3</sub>)<sub>3</sub>), 24.6 (s, C-CH<sub>3</sub> Dipp), 23.5 (s, CH{C(CH<sub>3</sub>)NDipp}<sub>2</sub>), 23.5 (s, C-CH<sub>3</sub> Dipp), -2.7 ppm (s, Mg-CH<sub>2</sub>). Elemental analysis (%). Found: C 77.93, H 9.60, N 4.83. Calculated for C<sub>35</sub>H<sub>54</sub>MgN<sub>2</sub>: C 79.75, H 10.33, N 5.31.

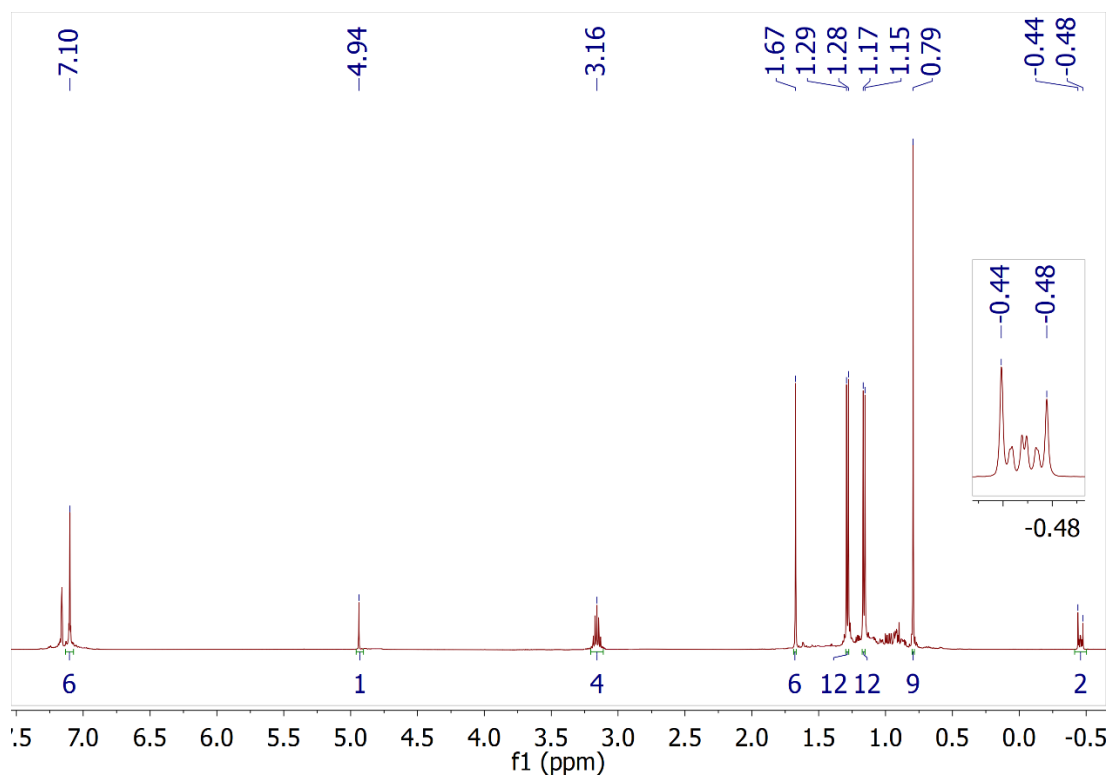

**Figure S7.** <sup>1</sup>H NMR spectrum (500 MHz, C<sub>6</sub>D<sub>6</sub>, 298K) of compound **9**.



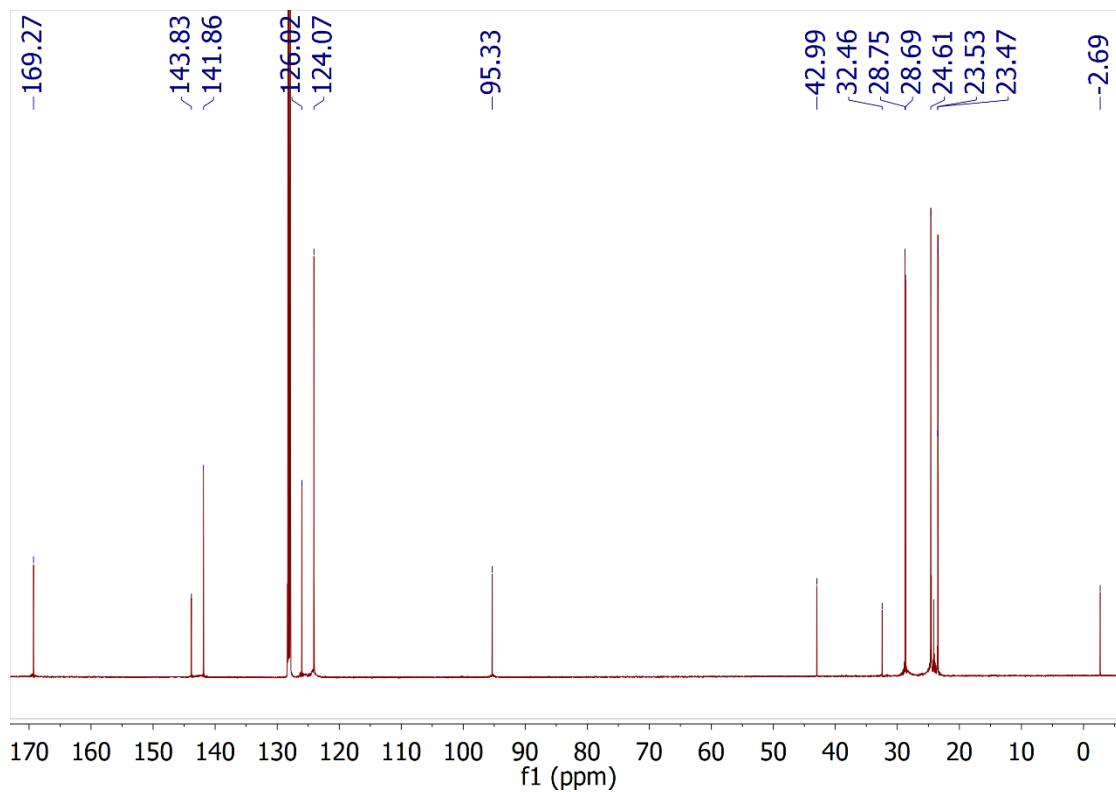

**Figure S8.**  $^{13}\text{C}\{^1\text{H}\}$  NMR spectrum (125.8 MHz,  $\text{C}_6\text{D}_6$ , 298K) of compound **9**.

**[(BDI)Mg{(CH<sub>2</sub>)<sub>2</sub>Ph}] and [(BDI)Mg{CH(CH<sub>3</sub>)(Ph)}] (10A,10B)**

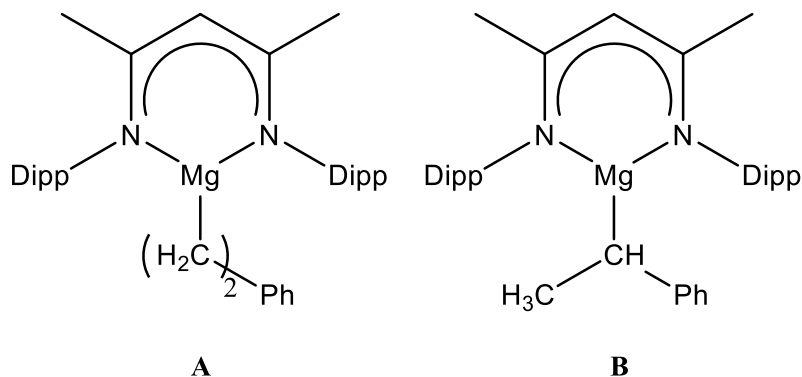

[(BDI)MgH]<sub>2</sub> (20 mg, 0.024 mmol) and styrene (5.6  $\mu$ L, 0.048 mmol) were dissolved in C<sub>6</sub>D<sub>6</sub> (0.5 mL) in a sealed J. Young NMR tube. After heating the resultant colourless solution for 7 days at 80 °C, the solvent was removed. Yield: 24 mg, 89%. <sup>1</sup>H NMR (500 MHz, C<sub>6</sub>D<sub>6</sub>,

298K):  $\delta$  **A** (55%): 7.26 – 6.96 (6H, CH Dipp and Ph), 4.94 (s, 1H, CH{C(CH<sub>3</sub>)NDipp}<sub>2</sub>), 3.14 (sept, <sup>3</sup>J<sub>HH</sub> = 6.9 Hz, 4H, CH(CH<sub>3</sub>)<sub>2</sub>), 2.44 (m, 2H, MgCH<sub>2</sub>CH<sub>2</sub>), 1.67 (s, 6H, CH{C(CH<sub>3</sub>)NDipp}<sub>2</sub>), 1.23 (d, <sup>3</sup>J<sub>HH</sub> = 6.9 Hz, 12H, CH(CH<sub>3</sub>)<sub>2</sub>), 1.16 (d, <sup>3</sup>J<sub>HH</sub> = 6.9 Hz, 12H, CH(CH<sub>3</sub>)<sub>2</sub>), 0.01 ppm (m, 2H, MgCH<sub>2</sub>); **B** (45%): 7.26 – 6.96 (6H, CH Dipp), 6.93 (m, 2H, *m*-CH Ph), 6.71 (m, 1H, *p*-CH Ph), 6.39 (m, 2H, *o*-CH Ph), 4.89 (s, 1H, CH{C(CH<sub>3</sub>)NDipp}<sub>2</sub>), 3.07 (sept, <sup>3</sup>J<sub>HH</sub> = 6.9 Hz, 2H, CH(CH<sub>3</sub>)<sub>2</sub>), 2.97 (sept, <sup>3</sup>J<sub>HH</sub> = 6.9 Hz, 2H, CH(CH<sub>3</sub>)<sub>2</sub>), 1.92 (c, <sup>3</sup>J<sub>HH</sub> = 7.1 Hz, 1H, CHPh), 1.64 (s, 6H, CH{C(CH<sub>3</sub>)NDipp}<sub>2</sub>), 1.26 (d, <sup>3</sup>J<sub>HH</sub> = 6.9 Hz, 6H, CH(CH<sub>3</sub>)<sub>2</sub>), 1.14 (d, <sup>3</sup>J<sub>HH</sub> = 7.1 Hz, 3H, PhCHCH<sub>3</sub>), 1.12 (d, <sup>3</sup>J<sub>HH</sub> = 6.9 Hz, 3H, CH(CH<sub>3</sub>)<sub>2</sub>), 1.11 (d, <sup>3</sup>J<sub>HH</sub> = 6.9 Hz, 6H, CH(CH<sub>3</sub>)<sub>2</sub>), 0.98 (d, <sup>3</sup>J<sub>HH</sub> = 6.9 Hz, 3H, CH(CH<sub>3</sub>)<sub>2</sub>), 0.95 ppm (d, <sup>3</sup>J<sub>HH</sub> = 6.9 Hz, 6H, CH(CH<sub>3</sub>)<sub>2</sub>). <sup>13</sup>C{<sup>1</sup>H} NMR (125.8 MHz, C<sub>6</sub>D<sub>6</sub>, 298K):  $\delta$  **A** (55%): 169.4 (s, NC(Me)), 151.1 (s, C Ph), 143.7 (s, NC Dipp), 141.9 (s, C-<sup>i</sup>Pr), 127.7 (*o*-CH Dipp), 128.8 – 124.2 (CH Dipp and Ph), 95.4 (s, CH{C(Me)NDipp}<sub>2</sub>), 34.5 (s, MgCH<sub>2</sub>CH<sub>2</sub>), 28.7 (s, CH(CH<sub>3</sub>)<sub>2</sub> Dipp), 24.6 (s, C-CH<sub>3</sub> Dipp), 23.5 (s, CH{C(CH<sub>3</sub>)NDipp}<sub>2</sub>), 23.4 (s, C-CH<sub>3</sub> Dipp), 7.7 ppm (s, MgCH<sub>2</sub>); **B** (45%): 169.5 (s, NC(Me)), 156.7 (s, C Ph), 144.1 (s, NC Dipp), 141.7 (s, C-<sup>i</sup>Pr), 141.4 (s, C-<sup>i</sup>Pr), 128.5 (s, *m*-CH Ph), 128.8 – 124.2 (CH Dipp), 123.0 (s, *o*-CH Ph), 118.5 (s, *p*-CH Ph), 95.2 (s, CH{C(Me)NDipp}<sub>2</sub>), 28.9 (s, CH(CH<sub>3</sub>)<sub>2</sub> Dipp), 28.7 (s, CH(CH<sub>3</sub>)<sub>2</sub> Dipp), 26.7 (s, PhCHCH<sub>3</sub>), 24.9, 24.4, 23.8, 23.8, 23.4 (s, C-CH<sub>3</sub> Dipp), 23.2 (s, CH{C(CH<sub>3</sub>)NDipp}<sub>2</sub>), 16.4 ppm (s, PhCHCH<sub>3</sub>). Elemental analysis (%). Found: C 82.02, H 9.30, N 4.94. Calculated for C<sub>37</sub>H<sub>50</sub>MgN<sub>2</sub>: C 81.23, H 9.21, N 5.12.

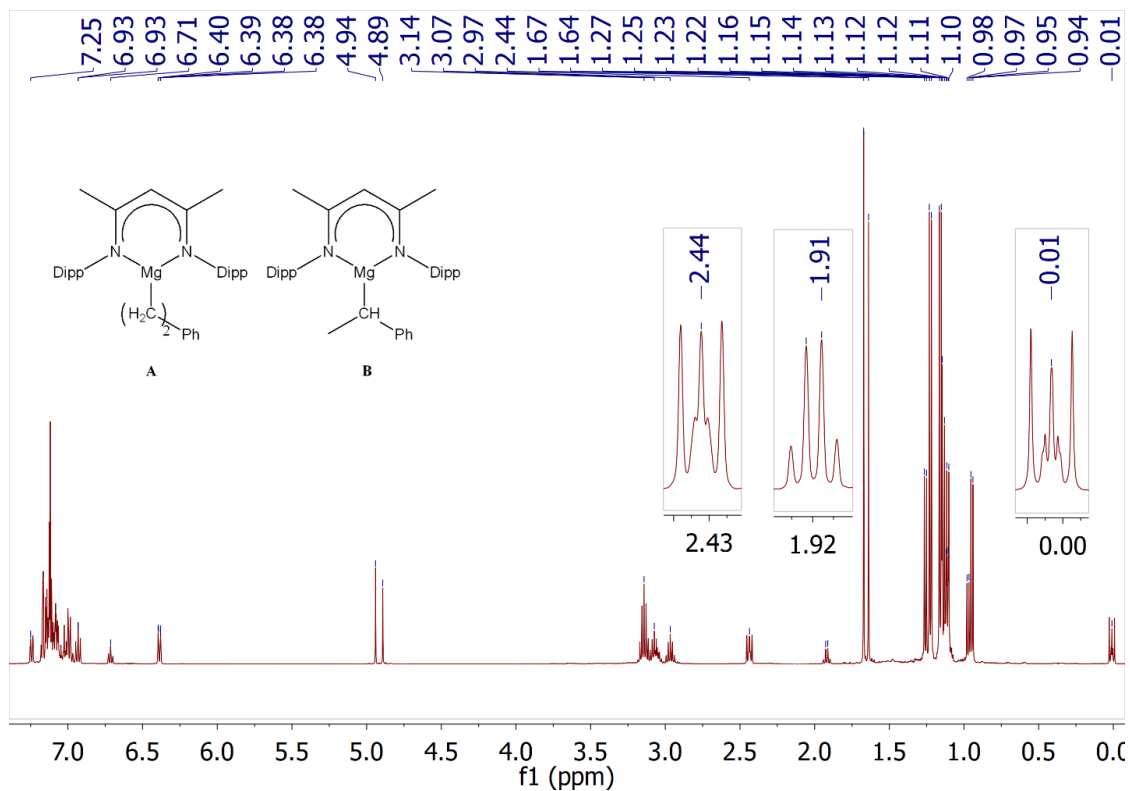

**Figure S9.**  $^1\text{H}$  NMR spectrum (500 MHz,  $\text{C}_6\text{D}_6$ , 298K) of compounds **10A** (55%) and **10B** (45%).

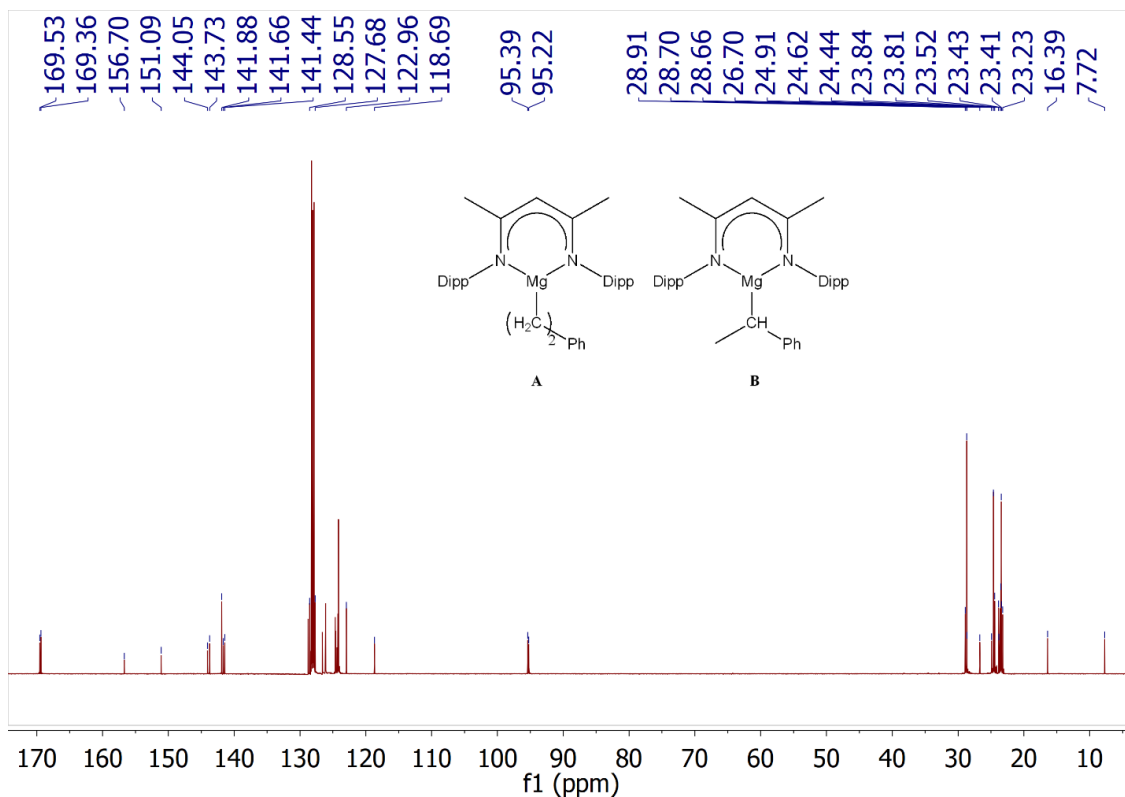

**Figure S10.**  $^{13}\text{C}\{^1\text{H}\}$  NMR spectrum (125.8 MHz,  $\text{C}_6\text{D}_6$ , 298K) of compounds **10A** (55%) and **10B** (45%).

**[(BDI)Mg{C(Ph)<sub>2</sub>(CH<sub>3</sub>)}] (11)**

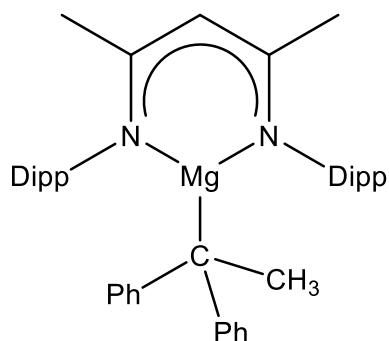

[(BDI)MgH]<sub>2</sub> (20 mg, 0.024 mmol) and 1,1-diphenylethylene (8.6 μL, 0.048 mmol) were dissolved in C<sub>6</sub>D<sub>6</sub> (0.5 mL) in a sealed J. Young NMR tube. After heating the resulting colorless solution at 100°C for 6 weeks the reaction reached a conversion of 64% (by NMR). <sup>1</sup>H NMR (500 MHz, C<sub>6</sub>D<sub>6</sub>, 298K): δ 7.13 – 7.09 (6H, CH Dipp), 6.99 – 6.97 (4H, CH Ph), 6.88 – 6.86 (4H, CH Ph), 6.85 – 6.81 (2H, CH Ph), 4.92 (s, 1H, CH{C(CH<sub>3</sub>)NDipp}<sub>2</sub>), 3.01 (sept, <sup>3</sup>J<sub>HH</sub> = 6.9 Hz, 4H, CH(CH<sub>3</sub>)<sub>2</sub>), 1.63 (s, 6H, CH{C(CH<sub>3</sub>)NDipp}<sub>2</sub>), 1.26 (s, 3H, MgC(CH<sub>3</sub>)), 1.08 (d, <sup>3</sup>J<sub>HH</sub> = 6.9 Hz, 12H, CH(CH<sub>3</sub>)<sub>2</sub>), 0.94 ppm (d, <sup>3</sup>J<sub>HH</sub> = 6.9 Hz, 12H, CH(CH<sub>3</sub>)<sub>2</sub>); <sup>13</sup>C{<sup>1</sup>H} NMR (125.8 MHz, C<sub>6</sub>D<sub>6</sub>, 298K): δ 170.9 (s, NC(Me)), 156.0 (s, C<sub>ipso</sub> Ph), 145.1 (s, NC Dipp), 142.4 (s, C-<sup>i</sup>Pr), 129.4, 127.7 (CH Ph), 126.6 (*p*-CH Dipp), 124.8 (*m*-CH Dipp), 122.3 (CH Ph), 96.1 (s, CH{C(Me)NDipp}<sub>2</sub>), 46.1 (s, Mg-C), 29.4 (s, CH(CH<sub>3</sub>)<sub>2</sub> Dipp), 27.4 (s, MgC-CH<sub>3</sub>), 24.9 (s, CH{C(CH<sub>3</sub>)NDipp}<sub>2</sub>), 24.8, 24.3 ppm (s, C-CH<sub>3</sub> Dipp).

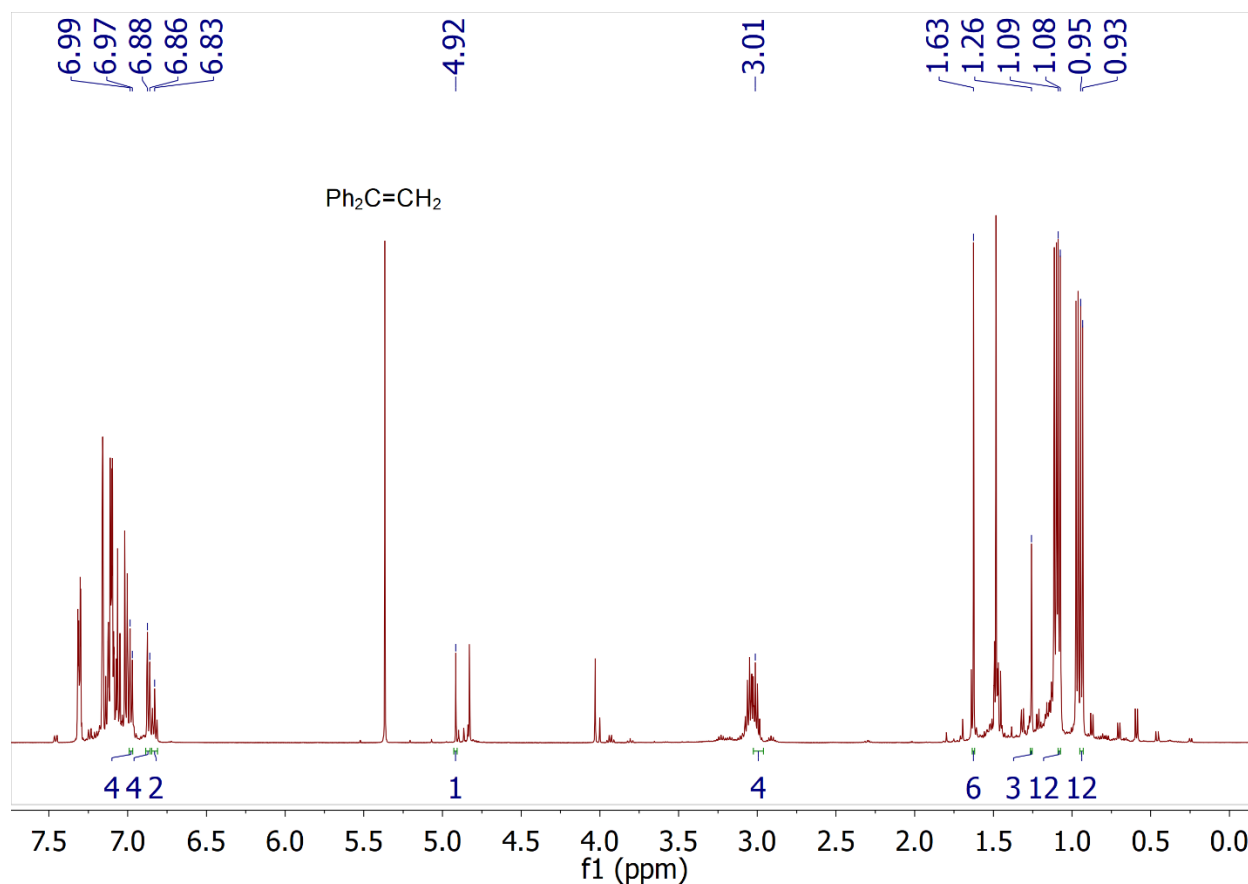

**Figure S11.** <sup>1</sup>H NMR spectrum (500 MHz, C<sub>6</sub>D<sub>6</sub>, 298K) of reaction between [(BDI)MgH]<sub>2</sub> (0.024 mmol) and 1,1-diphenylethylene (0.048 mmol) in C<sub>6</sub>D<sub>6</sub> after 6 weeks at 100°C.

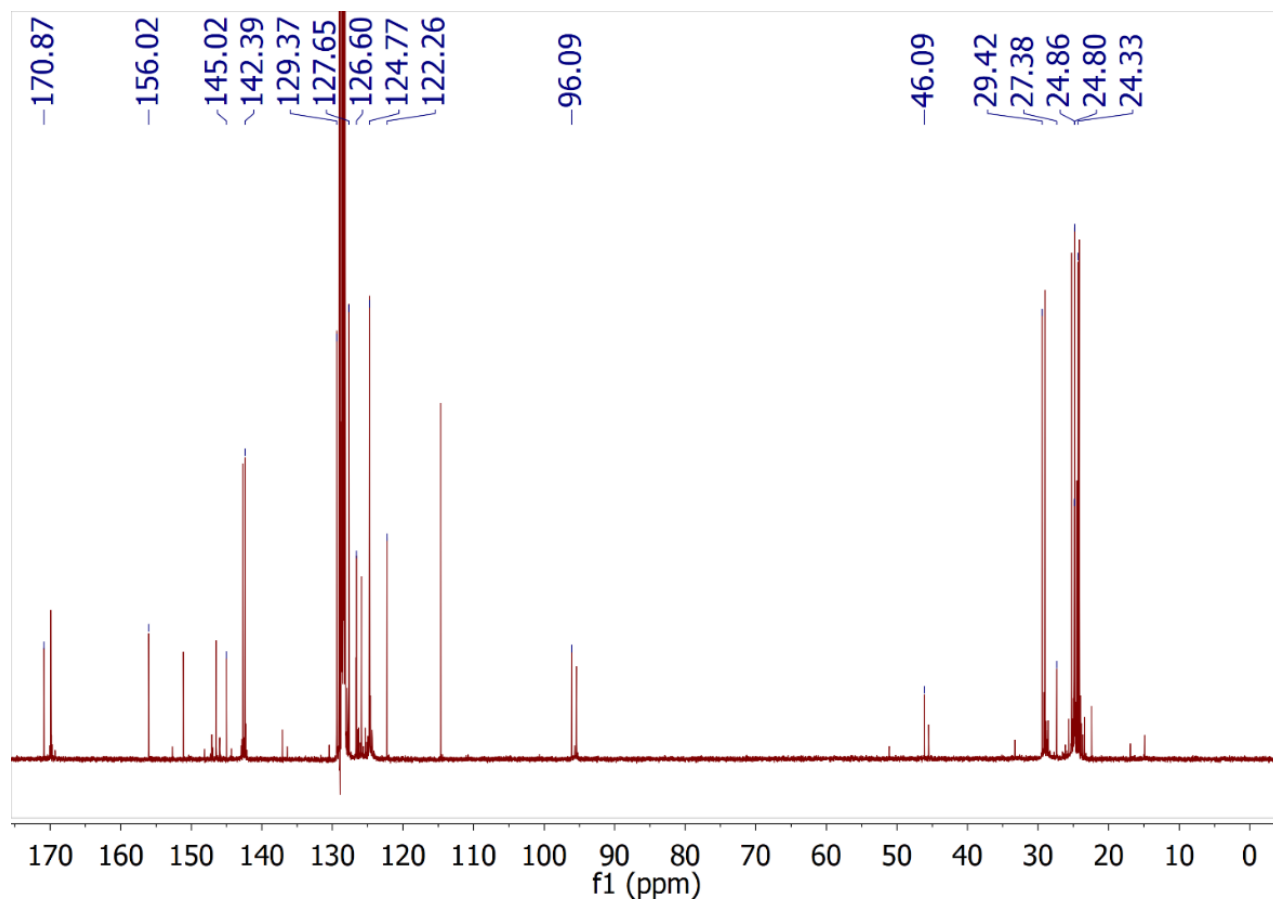

**Figure S12.**  $^{13}\text{C}\{^1\text{H}\}$  NMR spectrum (125.8 MHz,  $\text{C}_6\text{D}_6$ , 298K) of reaction between  $[(\text{BDI})\text{MgH}]_2$  (0.024 mmol) and 1,1-diphenylethylene (0.048 mmol) in  $\text{C}_6\text{D}_6$  after 6 weeks at  $100^\circ\text{C}$ .

**[(BDI)Mg{CH<sub>2</sub>CH(CH<sub>2</sub>)<sub>4</sub>}] (12)**

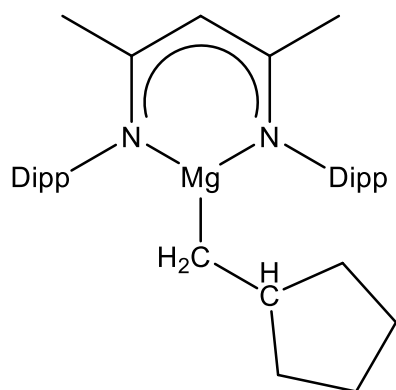

In a sealed J. Young NMR tube, 1,5-hexadiene (5.8  $\mu$ L, 0.048 mmol) was added to a C<sub>6</sub>D<sub>6</sub> (0.5 mL) solution of [(BDI)MgH]<sub>2</sub> (20 mg, 0.024 mmol). The reaction was heated for 1.5 days at 80°C and then evaporated to dryness in vacuo. Colourless single crystals of **12** suitable for X-ray crystallography were grown by slow evaporation of a saturated hexane solution at room temperature. Yield: 22 mg, 94%. <sup>1</sup>H NMR (500 MHz, C<sub>6</sub>D<sub>6</sub>, 298K):  $\delta$  7.14 – 7.08 (6H, CH Dipp), 4.94 (s, 1H, CH{C(CH<sub>3</sub>)NDipp}<sub>2</sub>), 3.16 (sept, <sup>3</sup>J<sub>HH</sub> = 6.9 Hz, 4H, CH(CH<sub>3</sub>)<sub>2</sub>), 1.98 – 1.85 (m, 1H, MgCH<sub>2</sub>CH), 1.67 (s, 6H, CH{C(CH<sub>3</sub>)NDipp}<sub>2</sub>), 1.61 – 1.53 (4H, CH<sub>2</sub>), 1.46 – 1.38 (4H, CH<sub>2</sub>), 1.29 (d, <sup>3</sup>J<sub>HH</sub> = 6.9 Hz, 12H, CH(CH<sub>3</sub>)<sub>2</sub>), 1.15 (d, <sup>3</sup>J<sub>HH</sub> = 6.9 Hz, 12H, CH(CH<sub>3</sub>)<sub>2</sub>), 0.72 – 0.58 (2H, CHCH<sub>2</sub>), -0.06 ppm (d, <sup>3</sup>J<sub>HH</sub> = 6.8 Hz, 2H, MgCH<sub>2</sub>). <sup>13</sup>C{<sup>1</sup>H} NMR (125.8 MHz, C<sub>6</sub>D<sub>6</sub>, 298K):  $\delta$  169.3 (s, NC(Me)), 144.0 (s, NC Dipp), 141.9 (s, C-<sup>i</sup>Pr), 126.0 (s, *p*-CH Dipp), 124.1 (s, *m*-CH Dipp), 95.4 (s, CH{C(Me)NDipp}<sub>2</sub>), 41.3 (s, MgCH<sub>2</sub>CH), 40.4 (s, CH<sub>2</sub>), 28.8 (s, CH(CH<sub>3</sub>)<sub>2</sub> Dipp), 25.8 (s, CH<sub>2</sub>), 24.6 (s, C-CH<sub>3</sub> Dipp), 23.7 (s, CH{C(CH<sub>3</sub>)NDipp}<sub>2</sub>), 23.6 (s, C-CH<sub>3</sub> Dipp), 13.7 ppm (s, MgCH<sub>2</sub>). Elemental analysis (%). Found: C 79.02, H 9.80, N 3.42. Calculated for C<sub>35</sub>H<sub>52</sub>MgN<sub>2</sub>: C 80.06, H 9.98, N 3.33.

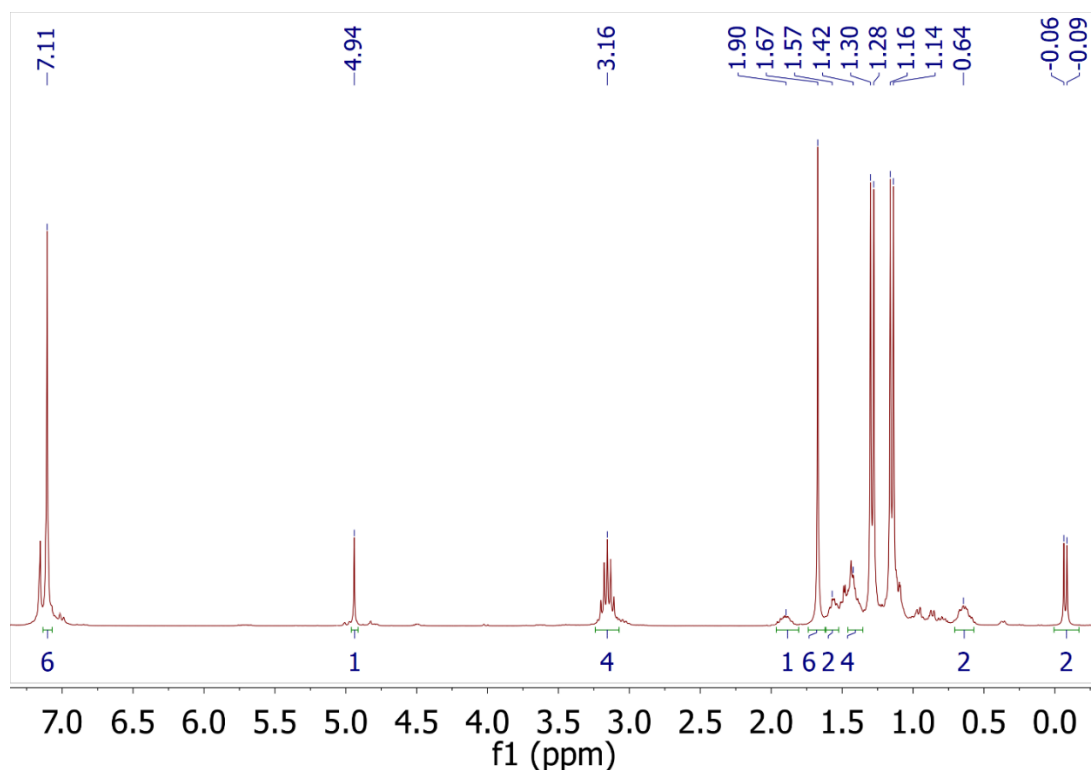

**Figure S13.** <sup>1</sup>H NMR spectrum (500 MHz, C<sub>6</sub>D<sub>6</sub>, 298K) of compound **12**.

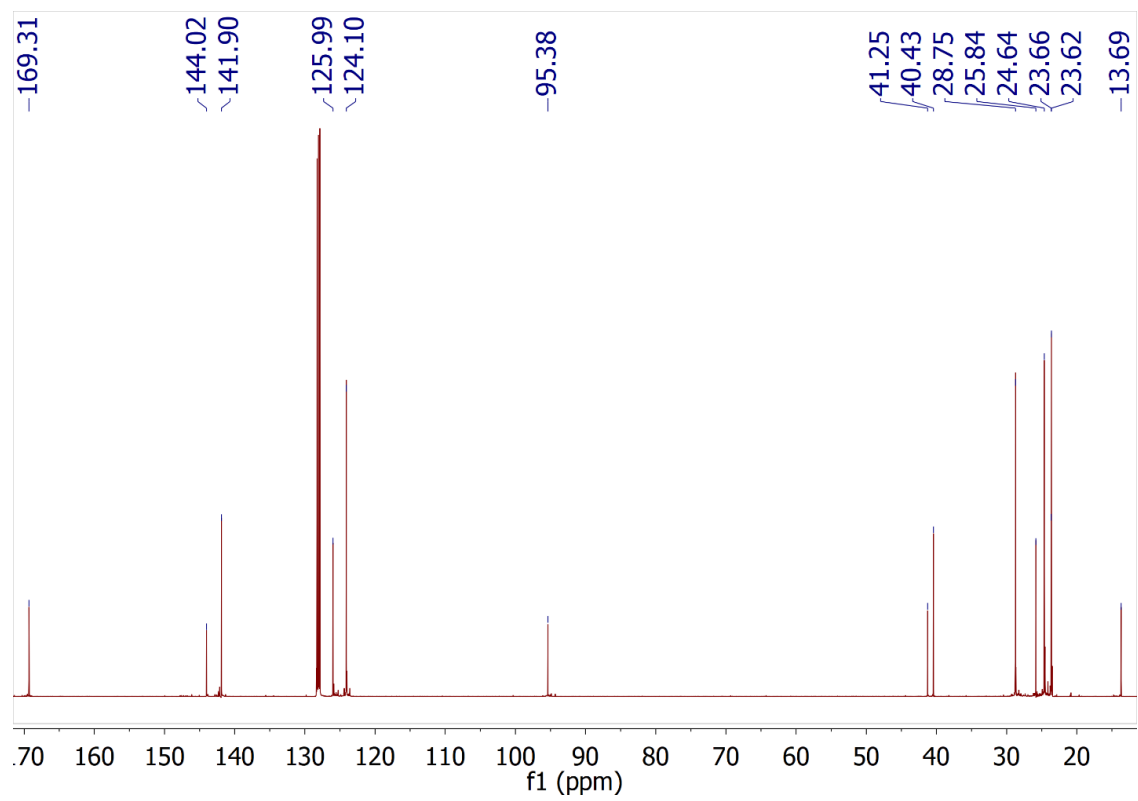

**Figure S14.**  $^{13}\text{C}\{^1\text{H}\}$  NMR spectrum (125.8 MHz,  $\text{C}_6\text{D}_6$ , 298K) of compound 12.

**[(BDI)Mg{(CH<sub>2</sub>)<sub>6</sub>CH=CH<sub>2</sub>}] (13) and [(BDI)Mg(CH<sub>2</sub>)<sub>6</sub>Mg(BDI)] (14)**

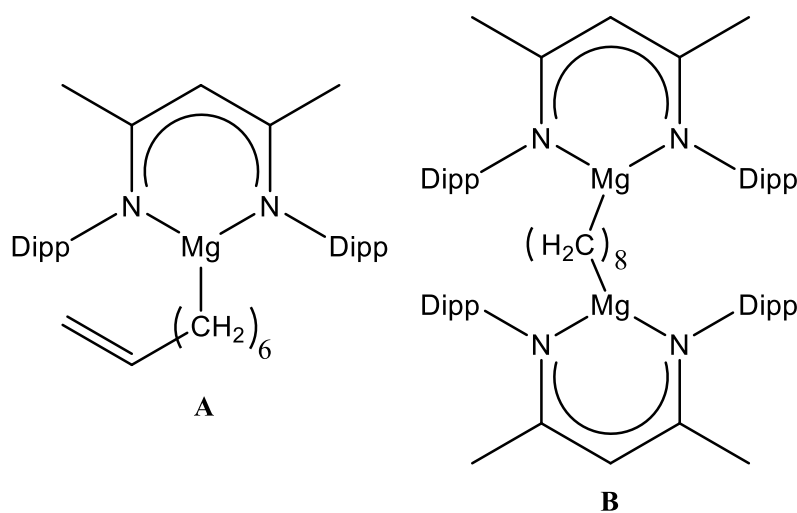

In a sealed J. Young NMR tube, C<sub>6</sub>D<sub>6</sub> (0.5 mL) was added to a mixture of [(BDI)MgH]<sub>2</sub> (20 mg, 0.024 mmol) and 1,7-octadiene (7.2 μL, 0.048 mmol). After heating the resulting colourless solution for 5 hours at 80 °C, the solvent was removed under vacuum. Yield: 23 mg, 88% (50% **13** + 50% **14**). <sup>1</sup>H NMR (500 MHz, C<sub>6</sub>D<sub>6</sub>, 298K): δ **13** (50%): 7.15 – 7.09 (6H, CH Dipp),

5.80 (ddt, <sup>3</sup>J<sub>HH</sub> = 17.0, 10.3, 6.7 Hz, 1H, CH=CH<sub>2</sub>), 5.02 (ddt, <sup>3</sup>J<sub>HH</sub> = 17.1, <sup>4</sup>J<sub>HH</sub> = <sup>2</sup>J<sub>HH</sub> = 1.8 Hz, 1H, CH=CH<sub>2</sub>), 4.97 (ddt, <sup>3</sup>J<sub>HH</sub> = 10.3, <sup>2</sup>J<sub>HH</sub> = 1.9 Hz, <sup>4</sup>J<sub>HH</sub> = 1.0, 1H, CH=CH<sub>2</sub>), 4.94 (s, 1H, CH{C(CH<sub>3</sub>)NDipp}<sub>2</sub>), 3.16 (sept, <sup>3</sup>J<sub>HH</sub> = 6.9 Hz, 4H, CH(CH<sub>3</sub>)<sub>2</sub>), 1.96 – 1.90 (m, 2H, CH<sub>2</sub>CH=CH<sub>2</sub>), 1.66 (s, 6H, CH{C(CH<sub>3</sub>)NDipp}<sub>2</sub>), 1.40 – 1.26 (m, 1H, MgCH<sub>2</sub>CH<sub>2</sub>), 1.28 (d, <sup>3</sup>J<sub>HH</sub> = 6.9 Hz, 12H, CH(CH<sub>3</sub>)<sub>2</sub>), 1.27 – 1.17 (m, 2H, CH<sub>2</sub>CH<sub>2</sub>CH=CH), 1.16 (d, <sup>3</sup>J<sub>HH</sub> = 6.9 Hz, 12H, CH(CH<sub>3</sub>)<sub>2</sub>), 1.00 – 0.90 (m, 2H, CH<sub>2</sub>), 0.90 – 0.82 (m, 2H, CH<sub>2</sub>), -0.24 ppm (t, <sup>3</sup>J<sub>HH</sub> = 7.9 Hz, 2H, MgCH<sub>2</sub>); **14** (50%): 7.15 – 7.09 (12H, CH Dipp), 4.94 (s, 2H, CH{C(CH<sub>3</sub>)NDipp}<sub>2</sub>), 3.16 (sept, <sup>3</sup>J<sub>HH</sub> = 6.9 Hz, 8H, CH(CH<sub>3</sub>)<sub>2</sub>), 1.67 (s, 12H, CH{C(CH<sub>3</sub>)NDipp}<sub>2</sub>), 1.38 – 1.28 (m, 2H, MgCH<sub>2</sub>CH<sub>2</sub>), 1.28 (d, <sup>3</sup>J<sub>HH</sub> = 6.9 Hz, 12H, CH(CH<sub>3</sub>)<sub>2</sub>), 1.16 (d, <sup>3</sup>J<sub>HH</sub> = 6.9 Hz, 12H, CH(CH<sub>3</sub>)<sub>2</sub>), 1.40 – 0.82 (8H, CH<sub>2</sub>), -0.23 ppm (t, <sup>3</sup>J<sub>HH</sub> = 7.9 Hz, 4H, MgCH<sub>2</sub>); <sup>13</sup>C{<sup>1</sup>H} NMR (125.8 MHz, C<sub>6</sub>D<sub>6</sub>, 298K): δ **13** (50%): 169.2 (s, NC(Me)), 143.9 (s, NC Dipp), 141.8 (s, C-<sup>i</sup>Pr), 139.8 (s, CH=CH<sub>2</sub>), 126.1 (*p*-CH Dipp), 124.1 (*m*-CH Dipp), 114.0 (s, CH=CH<sub>2</sub>), 95.3 (s, CH{C(Me)NDipp}<sub>2</sub>), 34.5 (s, CH<sub>2</sub>CH=CH<sub>2</sub>), 30.4 – 29.0 (s, CH<sub>2</sub>), 28.8 (s, MgCH<sub>2</sub>CH<sub>2</sub>), 28.7 (s, CH(CH<sub>3</sub>)<sub>2</sub> Dipp), 24.7 (s, C-CH<sub>3</sub> Dipp), 23.6 (s, CH{C(CH<sub>3</sub>)NDipp}<sub>2</sub>), 23.5 (s, C-CH<sub>3</sub> Dipp), 6.1 ppm (s, MgCH<sub>2</sub>); **14** (50%): 169.3 (s, NC(Me)), 143.9 (s, NC Dipp), 141.9 (s, C-<sup>i</sup>Pr), 126.0 (*p*-CH Dipp), 124.1 (*m*-CH Dipp), 95.4 (s, CH{C(Me)NDipp}<sub>2</sub>), 30.4 – 29.0 (s, CH<sub>2</sub>), 28.7 (s, MgCH<sub>2</sub>CH<sub>2</sub>), 28.7 (s, CH(CH<sub>3</sub>)<sub>2</sub> Dipp), 24.7 (s, C-CH<sub>3</sub> Dipp), 23.5 (s, C-CH<sub>3</sub> Dipp), 23.6 (s, CH{C(CH<sub>3</sub>)NDipp}<sub>2</sub>), 5.8 ppm (s, MgCH<sub>2</sub>). Elemental analysis (%). Found: C 78.93, H 10.55, N 5.26. Calculated for **13** (C<sub>66</sub>H<sub>108</sub>Mg<sub>2</sub>N<sub>4</sub>) + **14** (C<sub>37</sub>H<sub>56</sub>MgN<sub>2</sub>): C 79.33, H 10.60, N 5.39.

**13:** In a sealed J. Young NMR tube, C<sub>6</sub>D<sub>6</sub> (0.5 mL) was added to a mixture of [(BDI)MgH]<sub>2</sub> (20 mg, 0.024 mmol) and 1,7-octadiene (14.4 μL, 0.096 mmol). After 5 days at room temperature, the solvent was removed under vacuum (Figure S.15).



**14:** In a sealed J. Young NMR tube, C<sub>6</sub>D<sub>6</sub> (0.5 mL) was added to a mixture of [(BDI)MgH]<sub>2</sub> (16 mg, 0.020 mmol) and 1,7-octadiene (1.5 μL, 0.010 mmol). After heating the resulting colorless solution for 2 days at 80°C, the solvent was removed under vacuum (Figure S.16).

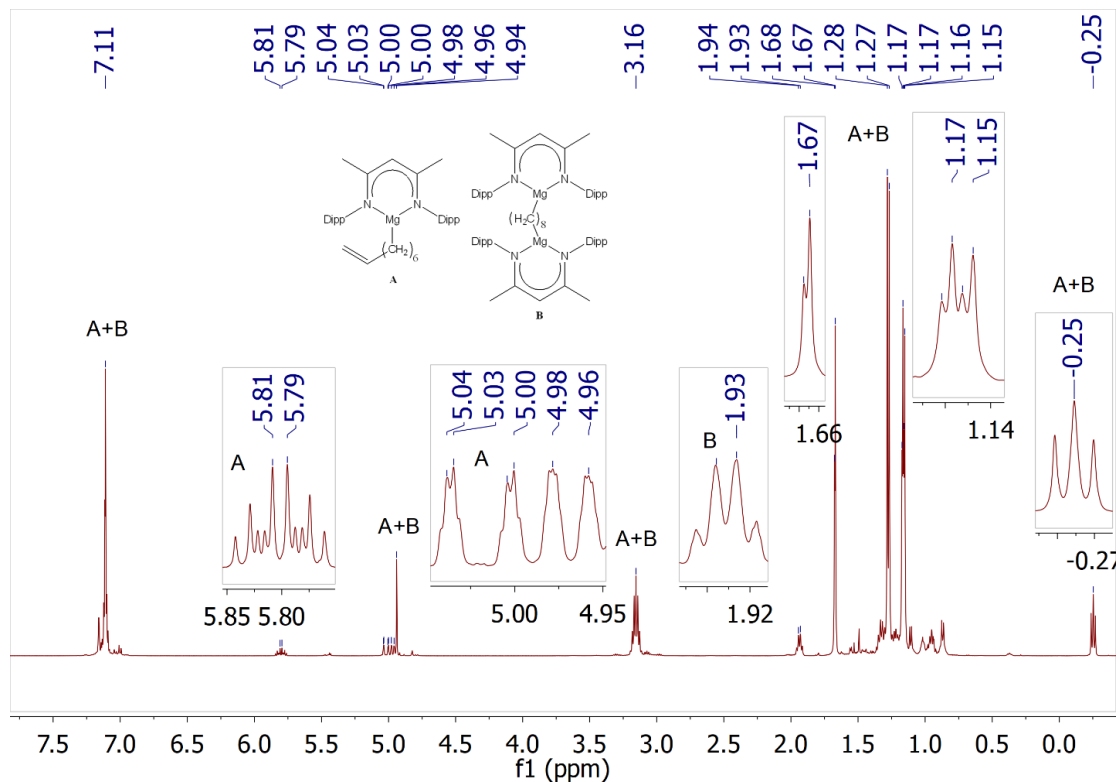

**Figure S15.** <sup>1</sup>H NMR spectrum (500 MHz, C<sub>6</sub>D<sub>6</sub>, 298K) of compounds **13** (50%) and **14** (50%).

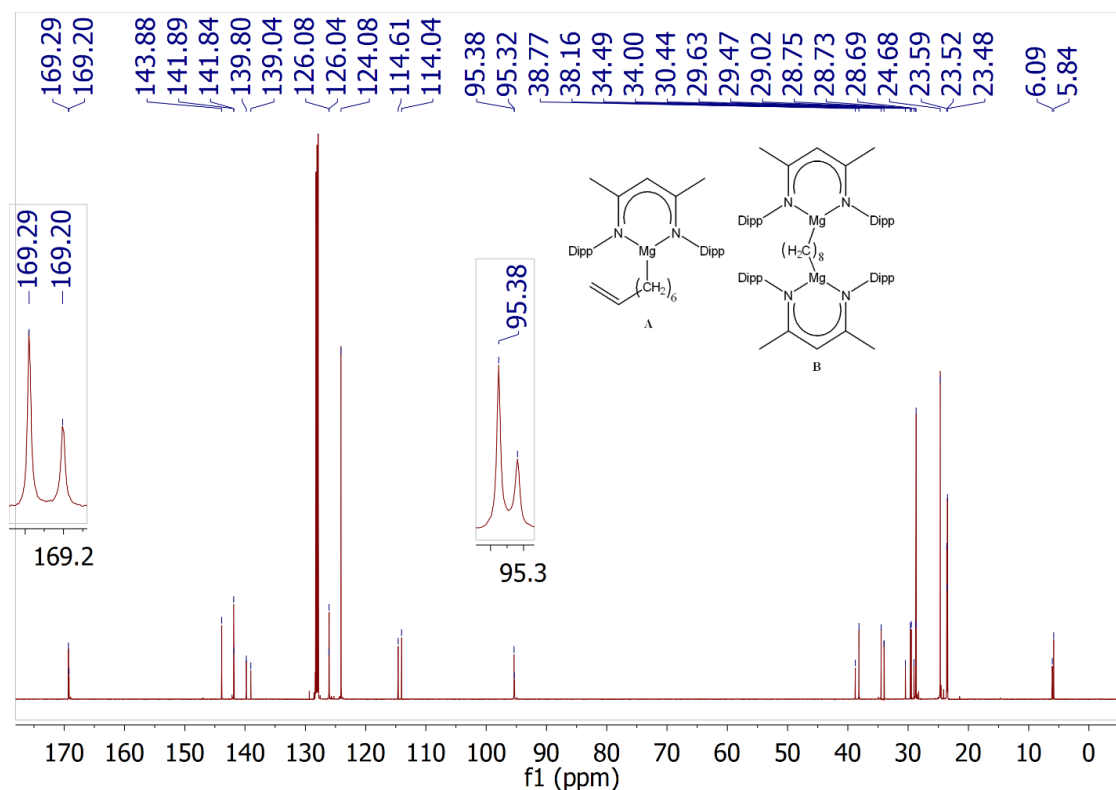

**Figure S16.**  $^{13}\text{C}\{^1\text{H}\}$  NMR spectrum (125.8 MHz,  $\text{C}_6\text{D}_6$ , 298K) of compounds **13** (50%) and **14** (50%).

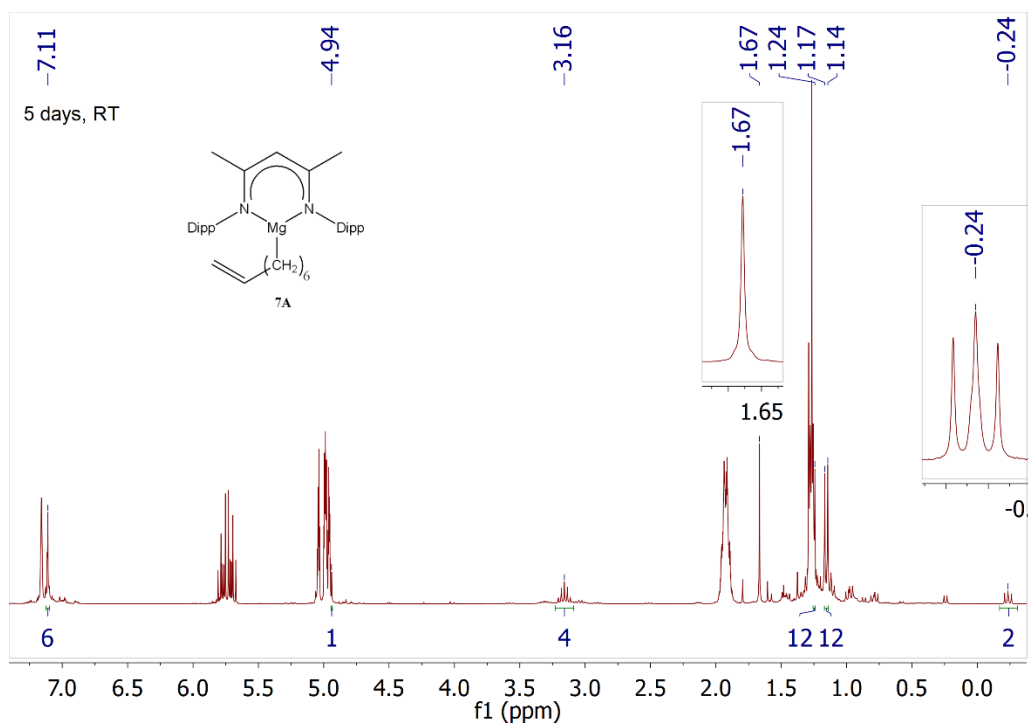

**Figure S17.** Stacked  $^1\text{H}$  NMR spectra (500 MHz,  $\text{C}_6\text{D}_6$ , 298K) of reaction between  $[(\text{BDI})\text{MgH}]_2$  (0.024 mmol) and 1,7-octadiene (0.096 mmol) at RT after 5 days. Assignment of major species: 1,7-octadiene ( $\text{CH}_2\text{-CH}=\text{CH}_2 = 5.74$  ppm). **13** (BDI methine = 4.94).

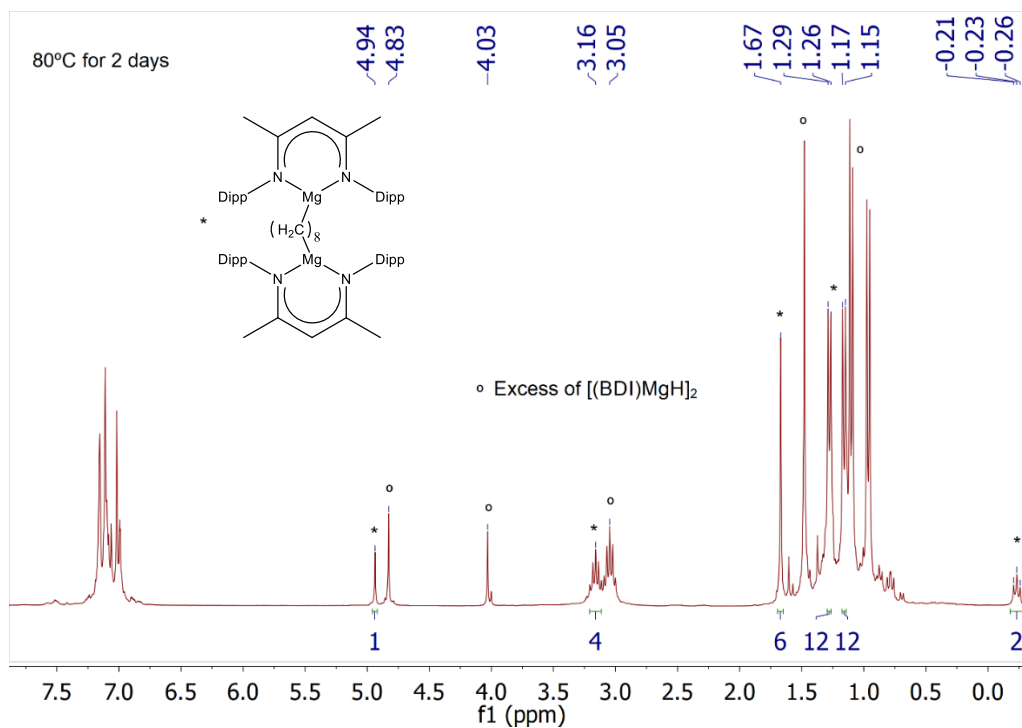

**Figure S18.** Stacked <sup>1</sup>H NMR spectra (500 MHz, C<sub>6</sub>D<sub>6</sub>, 298K) of reaction between [(BDI)MgH]<sub>2</sub> (0.020 mmol) and 1,7-octadiene (0.010 mmol) at 80°C after 2 days. Assignment of major species: [(BDI)MgH]<sub>2</sub>: (BDI methine = 4.83, MgH = 4.03 ppm) in 1:1 ratio. **14** (BDI methine = 4.94 ppm).

**[(BDI)Mg{CHCH<sub>2</sub>CHCH<sub>2</sub>CH(CH<sub>2</sub>)<sub>2</sub>}] (15)**

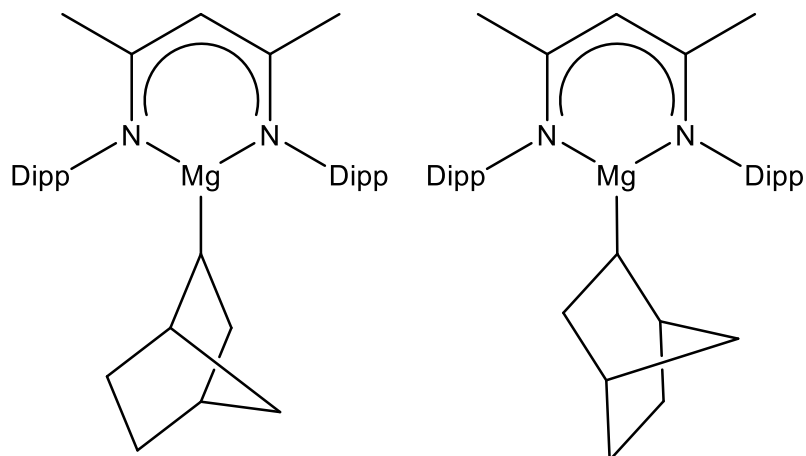

[(BDI)MgH]<sub>2</sub> (20 mg, 0.024 mmol) and norbornene (4.6 mg, 0.048 mmol) were dissolved in C<sub>6</sub>D<sub>6</sub> (0.5 mL) in a sealed J. Young NMR tube. After heating the resulting colorless solution for 3 days at 80 °C, the solvent was removed under vacuum. Colourless single crystals of **15** suitable for X-ray crystallography were grown by

slow evaporation of a saturated hexane solution at room temperature. Yield: 24 mg, 92%. <sup>1</sup>H NMR (500 MHz, C<sub>6</sub>D<sub>6</sub>, 298K): δ 7.13 – 7.11 (6H, CH Dipp), 4.93 (s, 1H, CH{C(CH<sub>3</sub>)NDipp}<sub>2</sub>), 3.15 (sept, <sup>3</sup>J<sub>HH</sub> = 6.9 Hz, 2H, CH(CH<sub>3</sub>)<sub>2</sub>), 3.14 (sept, <sup>3</sup>J<sub>HH</sub> = 6.9 Hz, 2H, CH(CH<sub>3</sub>)<sub>2</sub>), 2.20 – 2.17 (m, 1H, CH<sub>2</sub>), 1.82 – 1.80 (m, 1H, MgCHCH<sub>2</sub>CH), 1.70 – 1.00 (m, 5H, CH<sub>2</sub>), 1.67 (s, 6H, CH{C(CH<sub>3</sub>)NDipp}<sub>2</sub>), 1.42 – 1.32 (m, 1H, MgCHCH), 1.32 (d, <sup>3</sup>J<sub>HH</sub> = 6.9 Hz, 6H, CH(CH<sub>3</sub>)<sub>2</sub>), 1.31 (d, <sup>3</sup>J<sub>HH</sub> = 6.9 Hz, 6H, CH(CH<sub>3</sub>)<sub>2</sub>), 1.15 (d, <sup>3</sup>J<sub>HH</sub> = 6.9 Hz, 12H, CH(CH<sub>3</sub>)<sub>2</sub>), 1.18 – 1.13 (m, 1H, MgCHCH<sub>2</sub>), 1.02 – 0.99 (m, 1H, MgCHCH<sub>2</sub>), -0.14 ppm (ddd, <sup>3</sup>J<sub>HH</sub> = 9.9, 7.3, 2.4 Hz, 1H, MgCH); <sup>13</sup>C{<sup>1</sup>H} NMR (125.8 MHz, C<sub>6</sub>D<sub>6</sub>, 298K): δ 169.3 (s, NC(Me)), 144.4 (s, NC Dipp), 141.8 (s, C-<sup>i</sup>Pr), 141.8 (s, C-<sup>i</sup>Pr), 126.0 (*p*-CH Dipp), 124.1 (*m*-CH Dipp), 124.1 (*m*-CH Dipp), 95.3 (s, CH{C(Me)NDipp}<sub>2</sub>), 40.9 (s, MgCHCH<sub>2</sub>), 40.7 (s, MgCHCH<sub>2</sub>CH), 38.7 (s, CH<sub>2</sub>), 37.4 (s, CH<sub>2</sub>), 35.8 (s, MgCHCH), 30.6 (s, CH<sub>2</sub>), 28.8 (s, CH(CH<sub>3</sub>)<sub>2</sub> Dipp), 24.6, 24.5 (s, C-CH<sub>3</sub> Dipp), 24.1 (s, Mg-CH), 23.6, 23.6 (s, C-CH<sub>3</sub> Dipp), 23.5 ppm (s, CH{C(CH<sub>3</sub>)NDipp}<sub>2</sub>). Elemental analysis (%). Found: C 79.02, H 9.53, N 5.16. Calculated for C<sub>36</sub>H<sub>52</sub>MgN<sub>2</sub>: C 80.50, H 9.76, N 5.22.

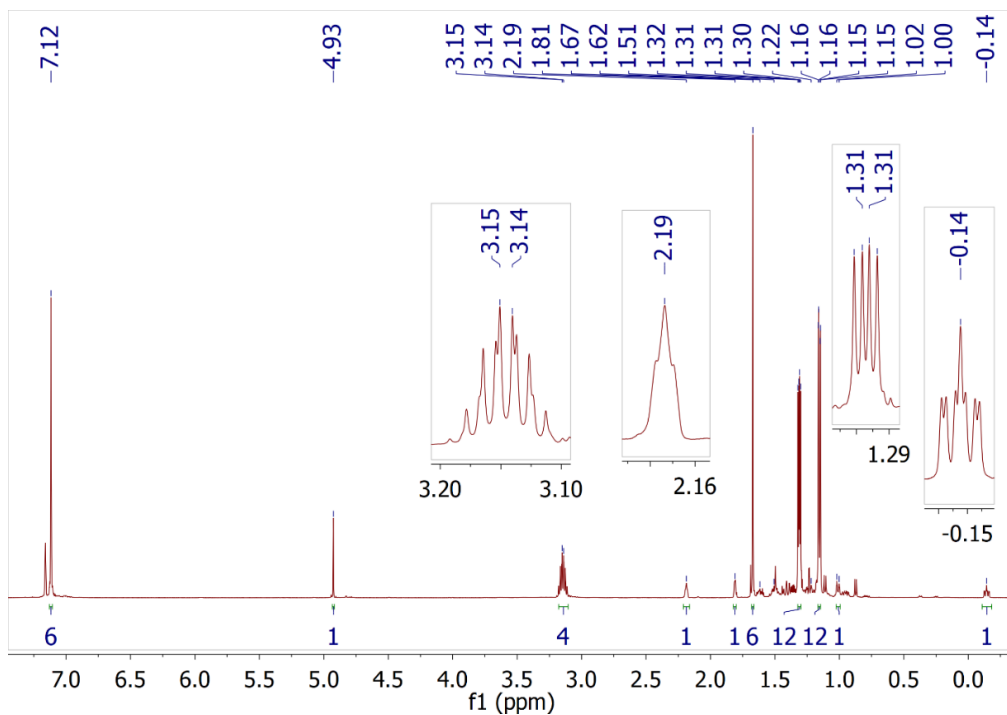

**Figure S19.**  $^1\text{H}$  NMR spectrum (500 MHz,  $\text{C}_6\text{D}_6$ , 298K) of compound **15**.

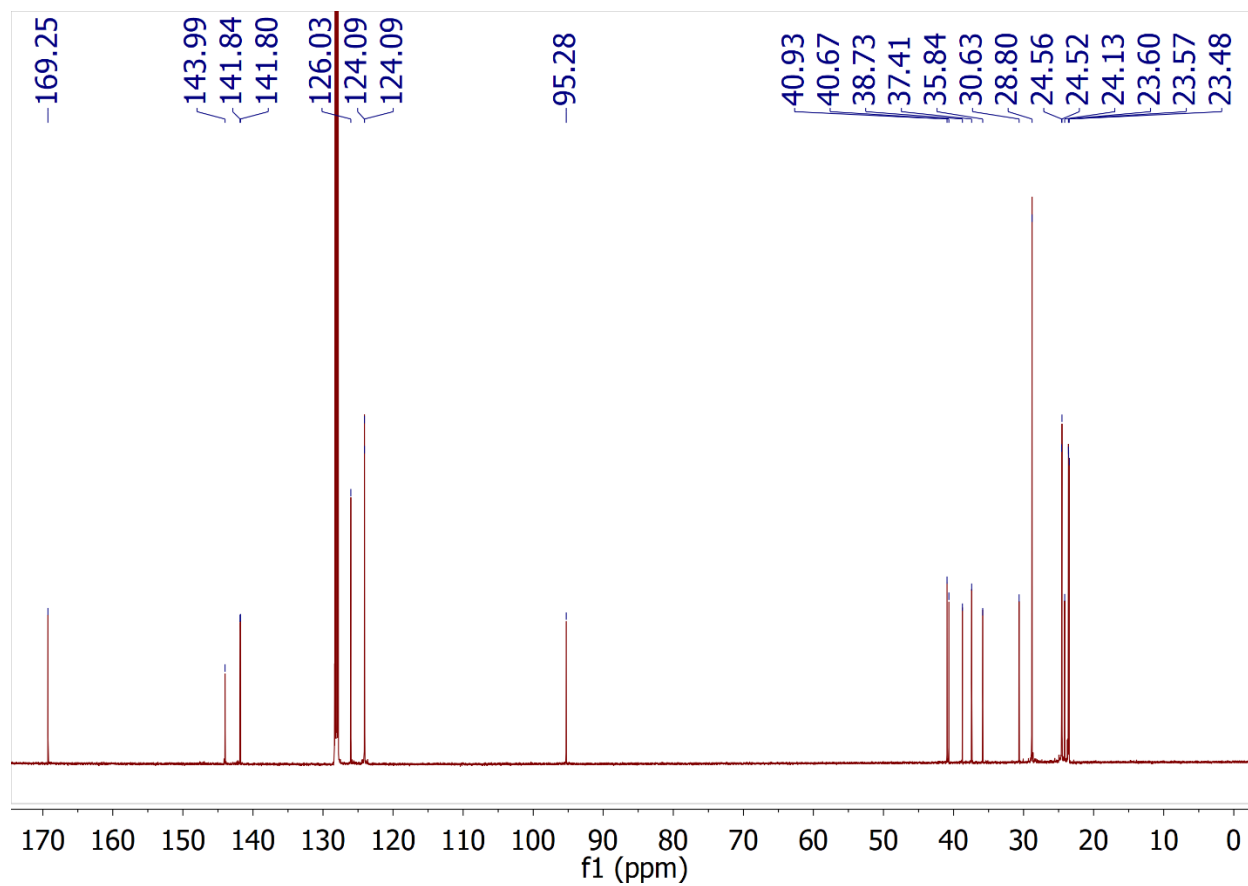

**Figure S20.**  $^{13}\text{C}\{^1\text{H}\}$  NMR spectrum (125.8 MHz,  $\text{C}_6\text{D}_6$ , 298K) of compound **15**.

**Stoichiometric insertion of 1-Hexene and norbornene into the Mg-H bond of [(BDI)MgH]<sub>2</sub>. Possible observation of the dimeric hydride complexes.**

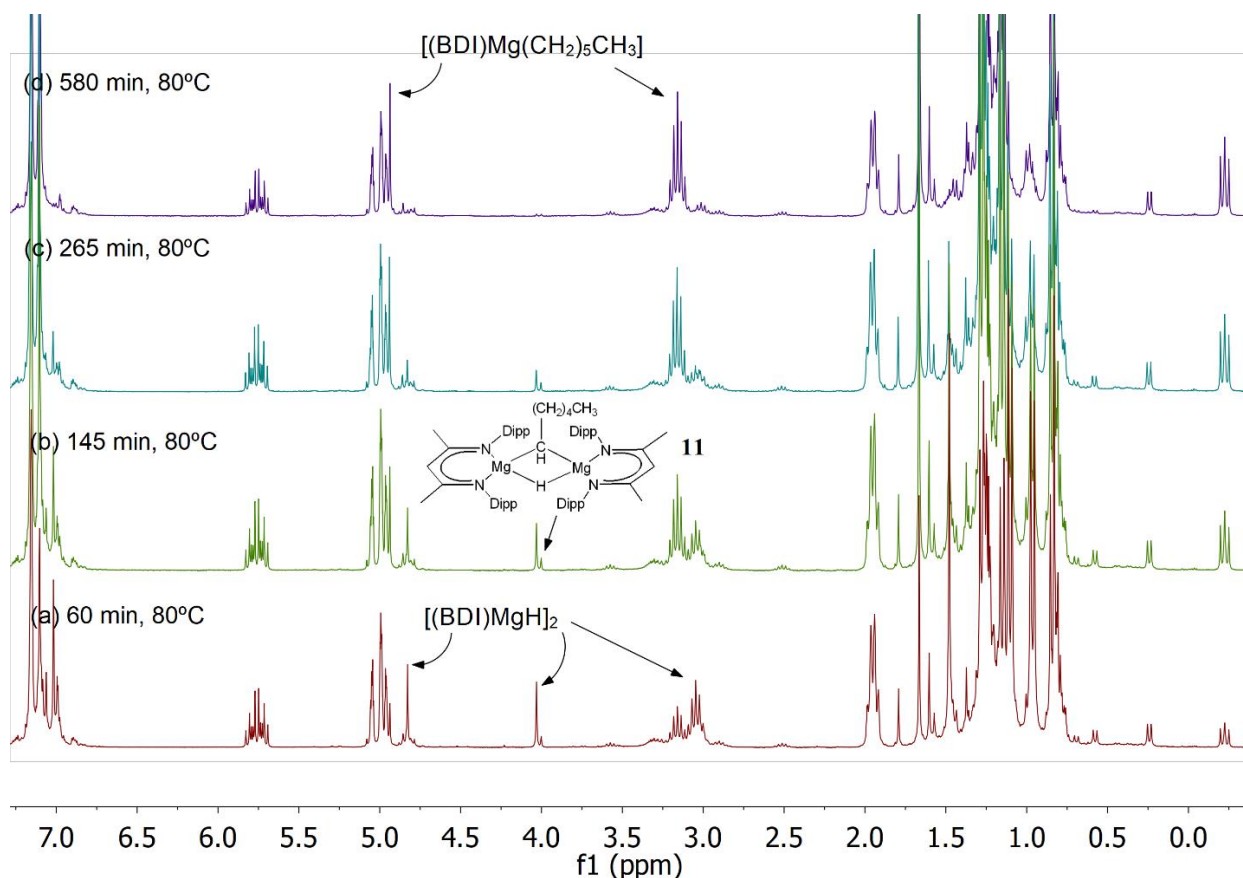

**Figure S21.** Stacked <sup>1</sup>H NMR spectra (300 MHz, C<sub>6</sub>D<sub>6</sub>, 298K) of reaction between [(BDI)MgH]<sub>2</sub> (0.012 mmol) and 1-hexene (0.064 mmol) in C<sub>6</sub>D<sub>6</sub> at 80°C after (a) 60, (b) 145, (c) 265 and (d) 580 min. Assignment of major species: [(BDI)MgH]<sub>2</sub>: (BDI methine = 4.84, MgH = 4.03 ppm) in 1:1 ratio. **4**: (BDI methine = 4.94 ppm). 1-Hexene: (CH=CH<sub>2</sub> = 5.76 ppm). Dimagnesium hydrido-hexyl species (MgH = 4.00 ppm).

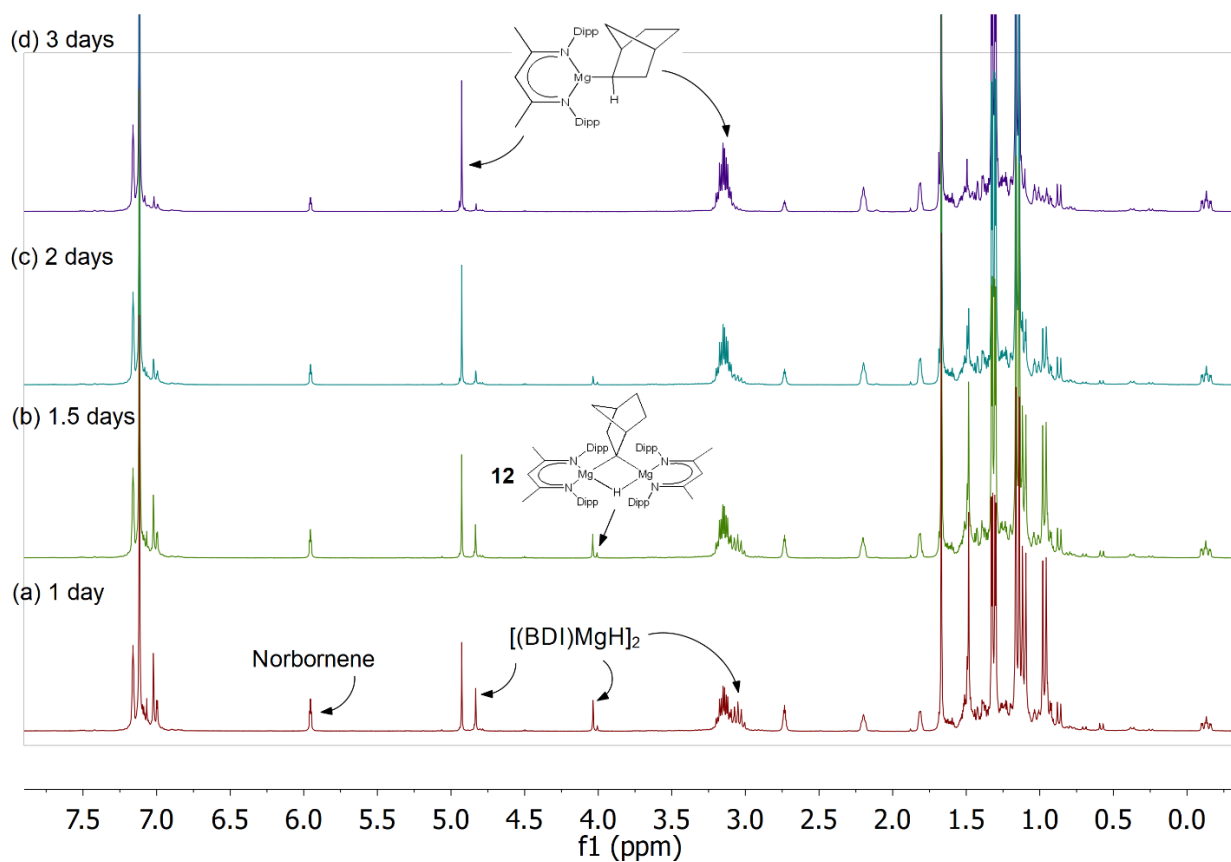

**Figure S22.** Stacked  $^1\text{H}$  NMR spectra (300 MHz,  $\text{C}_6\text{D}_6$ , 298K) of reaction between  $[(\text{BDI})\text{MgH}]_2$  (0.012 mmol) and norbornene (0.024 mmol) in  $\text{C}_6\text{D}_6$  at  $80^\circ\text{C}$  after (a) 1, (b) 1.5, (c) 2 and (d) 3 days. Assignment of major species:  $[(\text{BDI})\text{MgH}]_2$ : (BDI methine = 4.84,  $\text{MgH}$  = 4.03 ppm) in 1:1 ratio. **15**: (BDI methine = 4.93 ppm). Norbornene: ( $=\text{CH}$  = 5.95 ppm). Dimagnesium hydrido-norbornyl species: ( $\text{MgH}$  = 4.01 ppm).

**[(BDI)Mg{C(Ph)=CHPh}] (16)**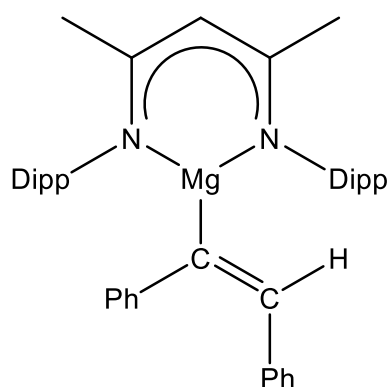

In a sealed J. Young NMR tube, C<sub>6</sub>D<sub>6</sub> (0.5 mL) was added to a mixture of [(BDI)MgH]<sub>2</sub> (20 mg, 0.024 mmol) and diphenylacetylene (8.7 mg, 0.048 mmol). After heating the resulting colourless solution for 6 days at 80 °C, the solvent was removed under vacuum. Yield: 28 mg, 92%. <sup>1</sup>H NMR (500 MHz, C<sub>6</sub>D<sub>6</sub>, 298K): δ 7.54 – 7.50 (1H, CH Ph), 7.26 – 6.90 (6H, CH Dipp and Ph), 6.87 – 6.77 (2H, CH Ph), 6.47 – 6.40 (m, 2H, *o*-CH Ph), 5.85 (s, 1H, =CHPh), 4.93 (s, 1H, CH{C(CH<sub>3</sub>)NDipp}<sub>2</sub>), 3.11 (sept, <sup>3</sup>J<sub>HH</sub> = 6.9 Hz, 4H, CH(CH<sub>3</sub>)<sub>2</sub>), 1.67 (s, 6H, CH{C(CH<sub>3</sub>)NDipp}<sub>2</sub>), 1.17 (d, <sup>3</sup>J<sub>HH</sub> = 6.9 Hz, 12H, CH(CH<sub>3</sub>)<sub>2</sub>), 1.14 ppm (d, <sup>3</sup>J<sub>HH</sub> = 6.9 Hz, 12H, CH(CH<sub>3</sub>)<sub>2</sub>). <sup>13</sup>C{<sup>1</sup>H} NMR (125.8 MHz, C<sub>6</sub>D<sub>6</sub>, 298K): δ 170.2 (s, MgC), 169.8 (s, NC(Me)), 152.0 (s, C Ph), 143.8 (s, NC Dipp), 141.9 (s, C-<sup>i</sup>Pr), 139.8 (s, C Ph), 139.3 (s, =CHPh), 132.0 (s, *m*-CH Ph), 129.6 (s, *o*-CH Ph), 128.7 – 126.2 (CH Dipp), 125.6 (s, CH Ph), 125.1 (s, *o*-CH Ph), 124.5 (*m*-CH Dipp), 122.2 (CH Dipp), 95.3 (s, CH{C(Me)NDipp}<sub>2</sub>), 28.8 (s, CH(CH<sub>3</sub>)<sub>2</sub> Dipp), 24.5, 23.5 (s, C-CH<sub>3</sub> Dipp), 23.4 ppm (s, CH{C(CH<sub>3</sub>)NDipp}<sub>2</sub>). Elemental analysis (%). Found: C 83.23, H 8.43, N 4.54. Calculated for C<sub>43</sub>H<sub>52</sub>MgN<sub>2</sub>: C 83.14, H 8.44, N 4.51.

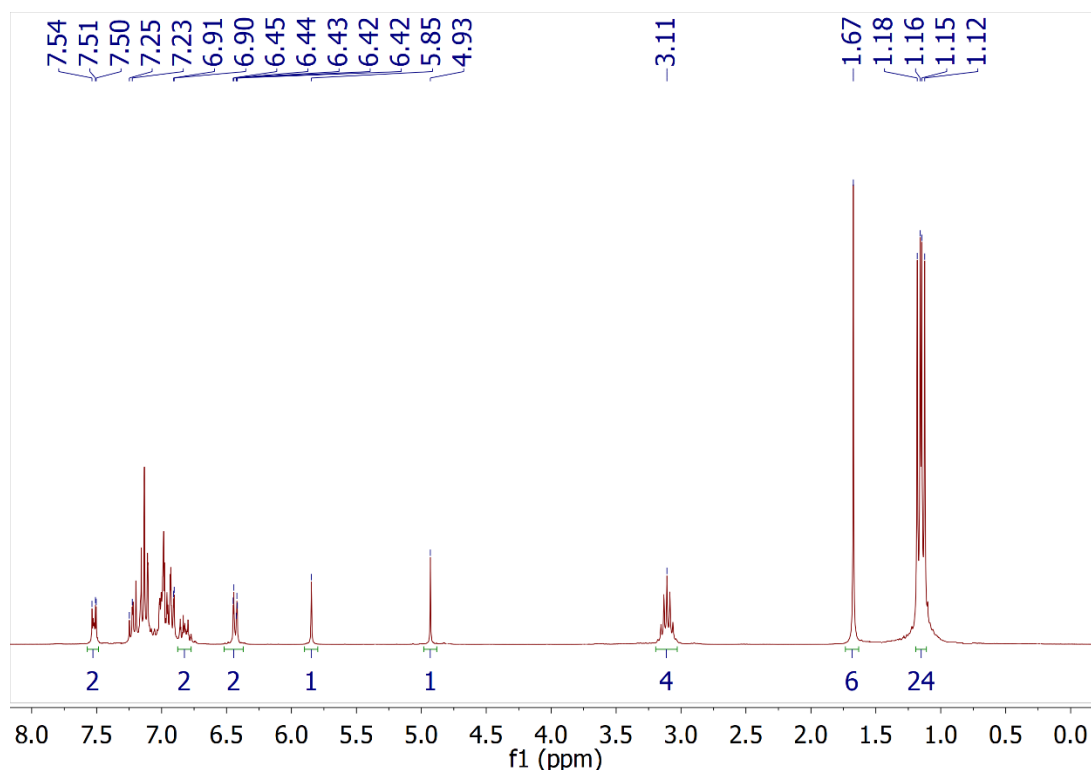

**Figure S23.** <sup>1</sup>H NMR spectrum (500 MHz, C<sub>6</sub>D<sub>6</sub>, 298K) of compound **16**.



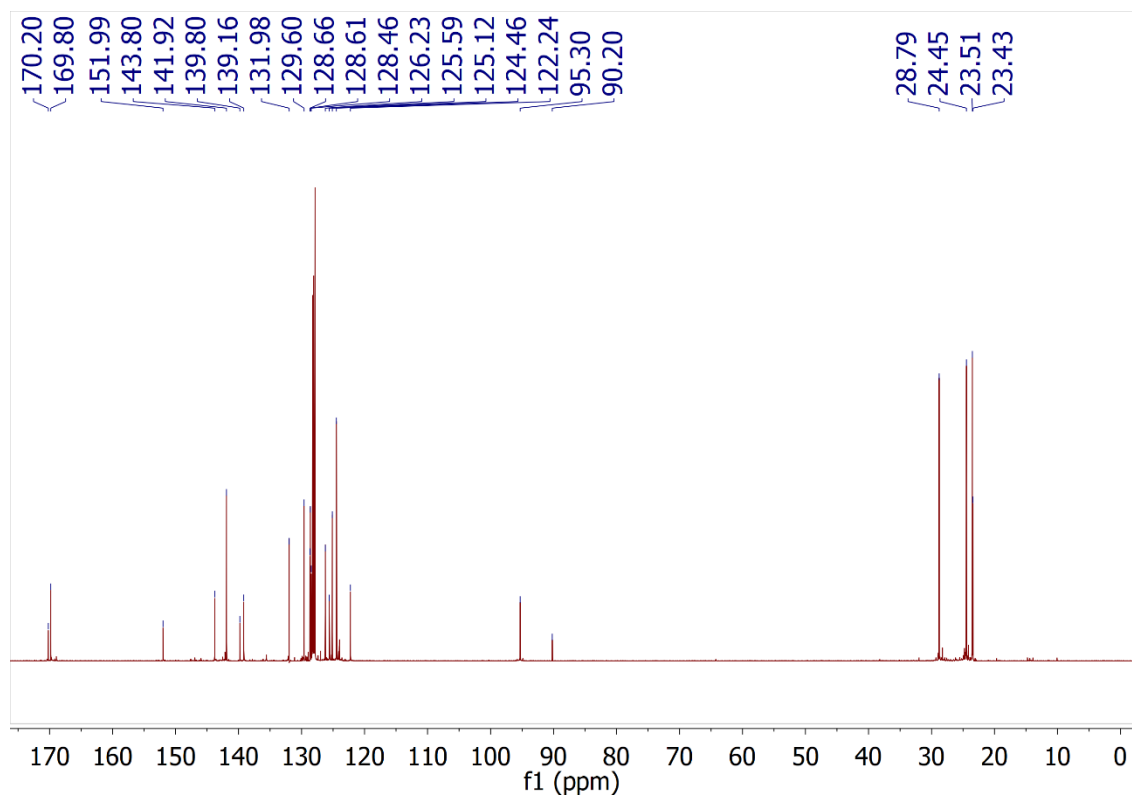

**Figure S24.**  $^{13}\text{C}\{^1\text{H}\}$  NMR spectrum (125.8 MHz,  $\text{C}_6\text{D}_6$ , 298K) of compound 16.

**General Method for Catalytic Hydrosilylation mediated by [(BDI)MgH]<sub>2</sub>**

Catalyst, [(BDI)MgH]<sub>2</sub> (5 mol%), substrate (0.010 mmol) and phenylsilane (0.025 mmol) were dissolved in C<sub>6</sub>D<sub>6</sub> (0.4 mL) in a J. Young NMR tube, and the resulting solution heated at 80 °C. The reactions were monitored via <sup>1</sup>H NMR spectroscopy with their progress evidenced by the consumption of the olefinic resonances alongside the emergence of the respective SiH<sub>2</sub> resonances.

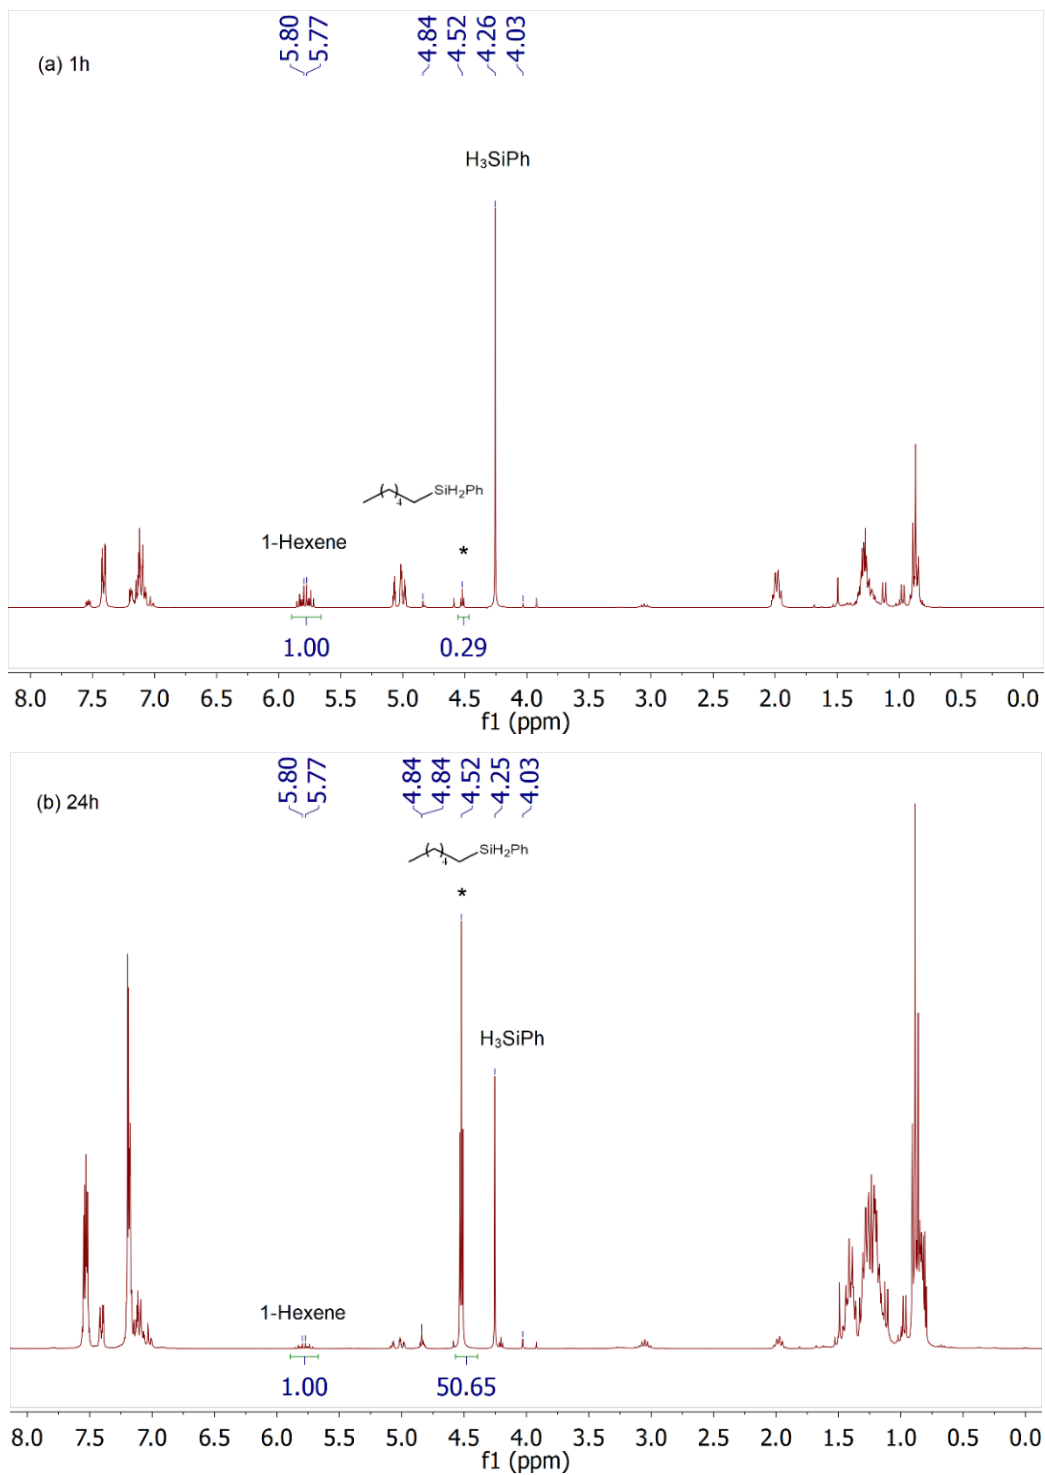

**Figure S25.** <sup>1</sup>H NMR spectra (300 MHz) of catalytic hydrosilylation of 1-hexene (0.338 mmol) mediated by [(BDI)MgH]<sub>2</sub> (10%) in C<sub>6</sub>D<sub>6</sub> (0.4 mL) after (a) 1 hour and (b) 24 hours at 80°C. Assignment of major species: [(BDI)MgH]<sub>2</sub>: (BDI methine = 4.84, MgH = 4.03 ppm) in 1:1 ratio. H<sub>3</sub>SiPh: (H<sub>3</sub>Si = 4.25 ppm). 1-Hexene: (CH=CH<sub>2</sub> = 5.78 ppm). PhH<sub>2</sub>Si(CH<sub>2</sub>)<sub>5</sub>CH<sub>3</sub>: (H<sub>2</sub>Si = 4.52 ppm).

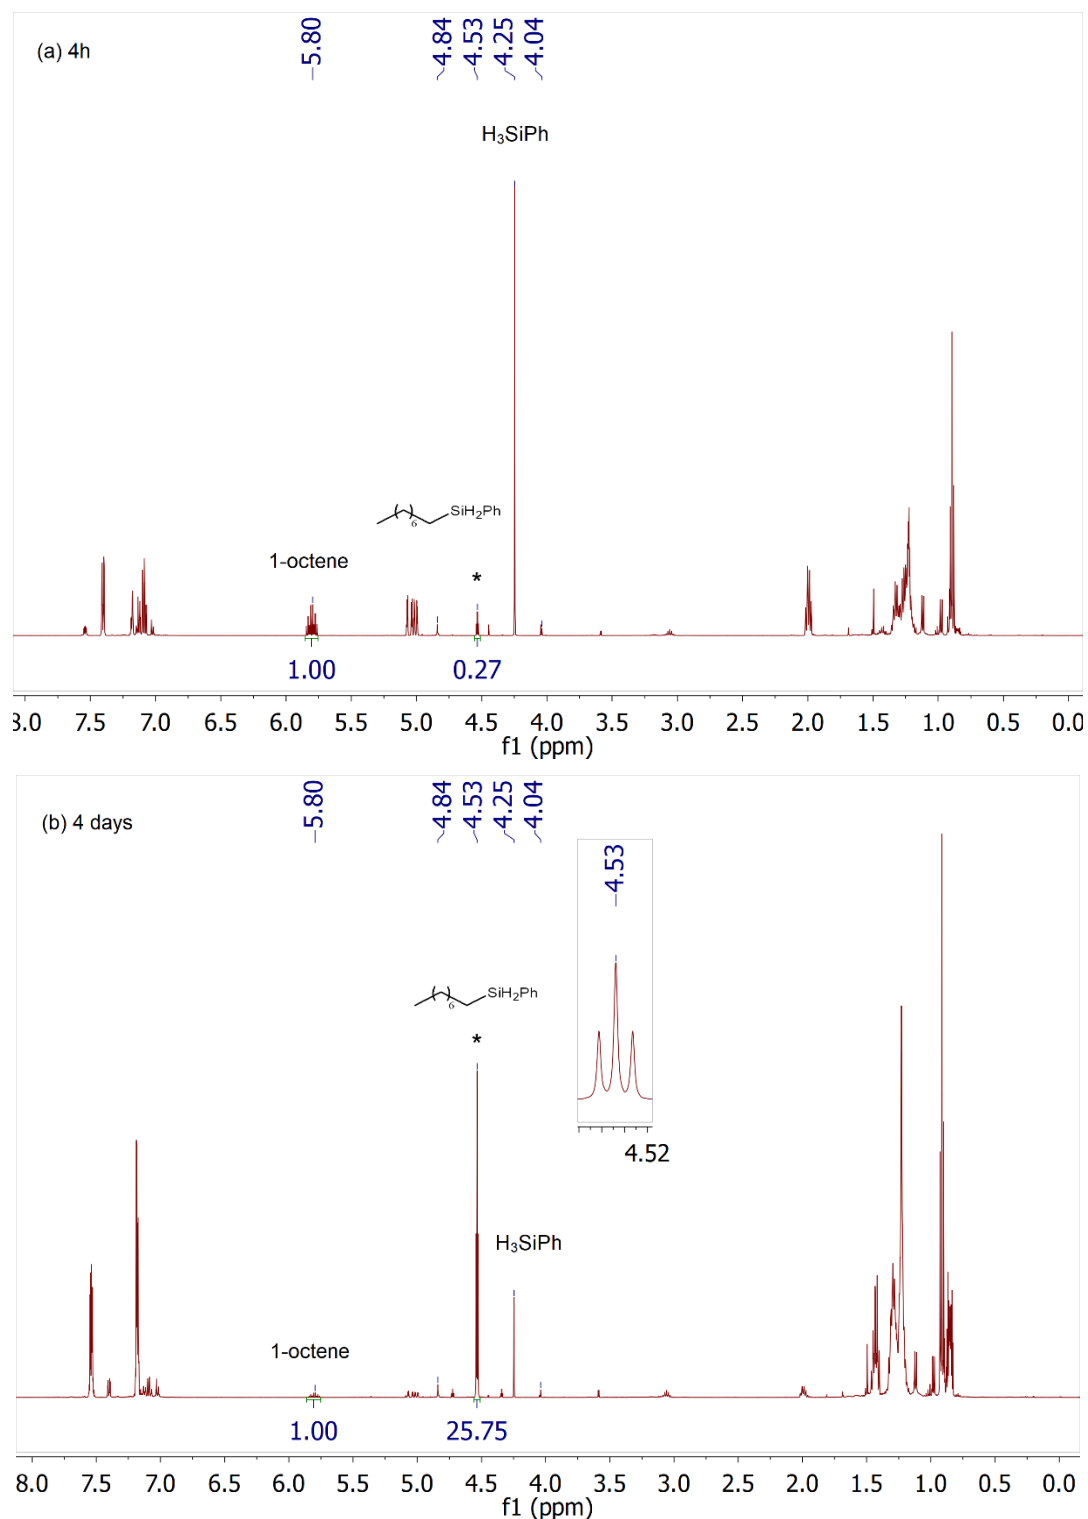

**Figure S26.** <sup>1</sup>H NMR spectra (300 MHz) of catalytic hydrosilylation of 1-octene (0.108 mmol) mediated by [(BDI)MgH]<sub>2</sub> (5%) in C<sub>6</sub>D<sub>6</sub> (0.4 mL) after (a) 4 hours and (b) 4 days at 80°C. Assignment of major species: [(BDI)MgH]<sub>2</sub>: (BDI methine = 4.84, MgH = 4.04 ppm) in 1:1 ratio. H<sub>3</sub>SiPh: (H<sub>3</sub>Si = 4.25 ppm). 1-Octene: (CH=CH<sub>2</sub> = 5.80 ppm). PhH<sub>2</sub>Si(CH<sub>2</sub>)<sub>7</sub>CH<sub>3</sub>: (H<sub>2</sub>Si = 4.53 ppm).

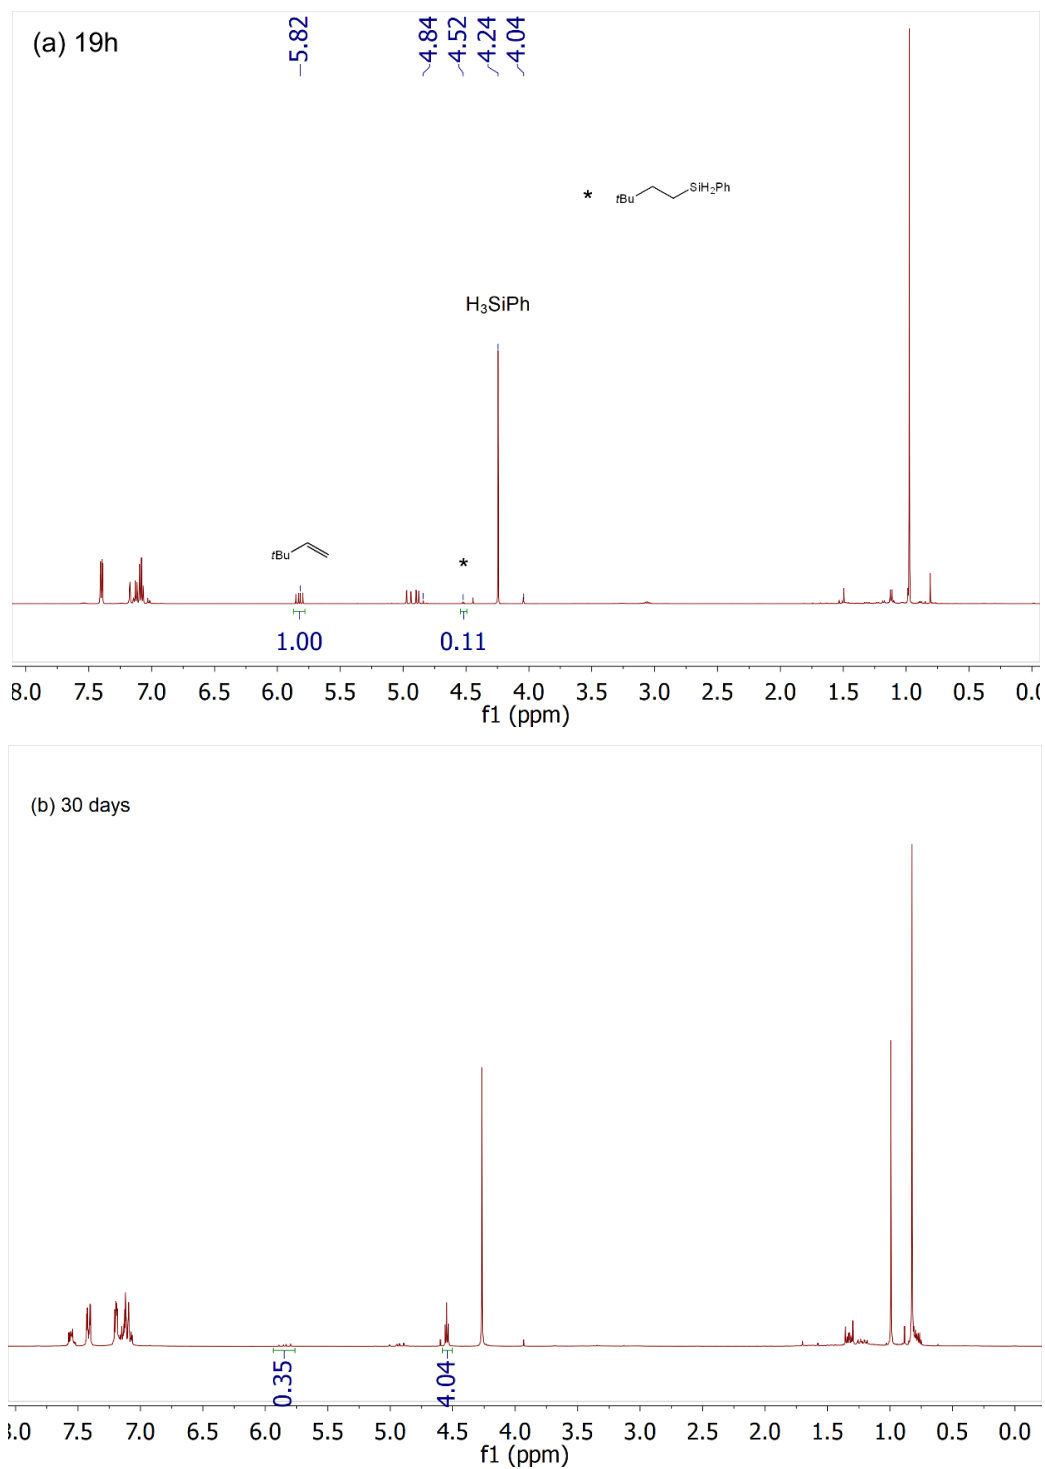

**Figure S27.**  $^1\text{H}$  NMR spectra (300 MHz) of catalytic hydrosilylation of 3,3-dimethyl-1-butene (0.106 mmol) mediated by  $[(\text{BDI})\text{MgH}]_2$  (5%) in  $\text{C}_6\text{D}_6$  (0.4 mL) after (a) 19 hours and (b) 30 days at  $80^\circ\text{C}$ . Assignment of major species:  $[(\text{BDI})\text{MgH}]_2$ : (BDI methine = 4.84,  $\text{MgH}$  = 4.04 ppm) in 1:1 ratio.  $\text{H}_3\text{SiPh}$ : ( $\text{H}_3\text{Si}$  = 4.24 ppm). 3,3-dimethyl-1-butene: ( $\text{CH}=\text{CH}$  = 5.82 ppm).  $t\text{Bu}(\text{CH}_2)_2\text{SiH}_2\text{Ph}$ : ( $\text{H}_2\text{Si}$  = 4.52 ppm).

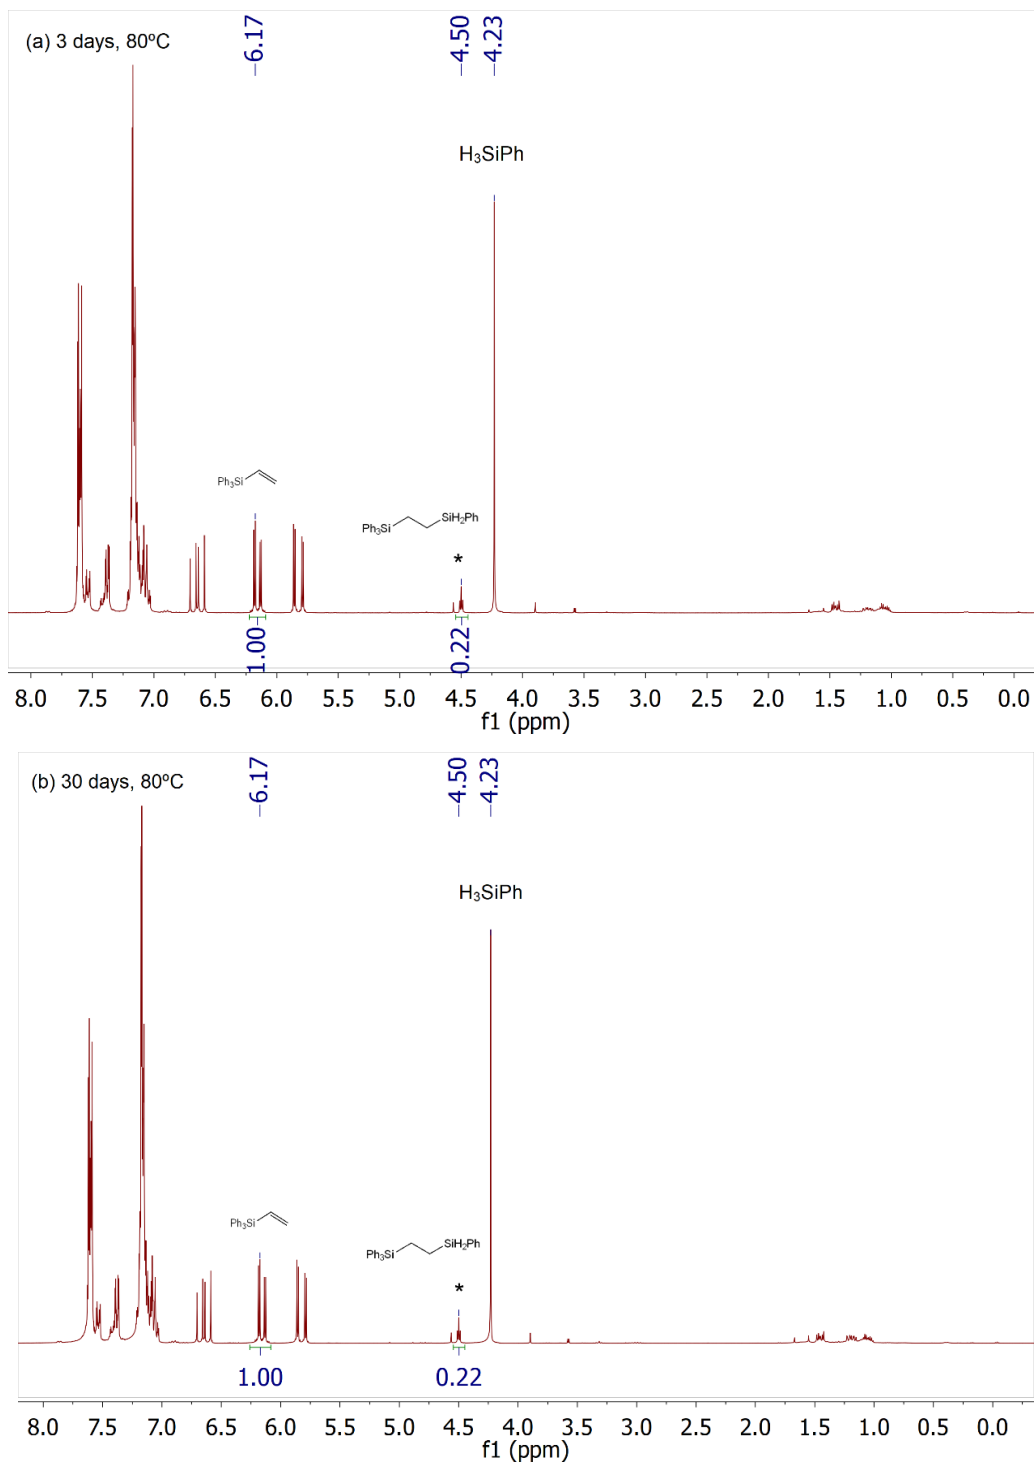

**Figure S28.** <sup>1</sup>H NMR spectra (300 MHz) of catalytic hydrosilylation of allyltriphenylsilane (0.107 mmol) mediated by [(BDI)MgH]<sub>2</sub> (5%) in C<sub>6</sub>D<sub>6</sub> (0.4 mL) after (a) 3 days and (b) 30 days at 80°C. Assignment of major species: H<sub>3</sub>SiPh: (H<sub>3</sub>Si = 4.23 ppm). Allyltriphenylsilane: (CH=CH<sub>2</sub> = 6.17 ppm). Ph<sub>3</sub>Si(CH<sub>2</sub>)<sub>2</sub>SiH<sub>2</sub>Ph: (H<sub>2</sub>Si = 4.50 ppm).

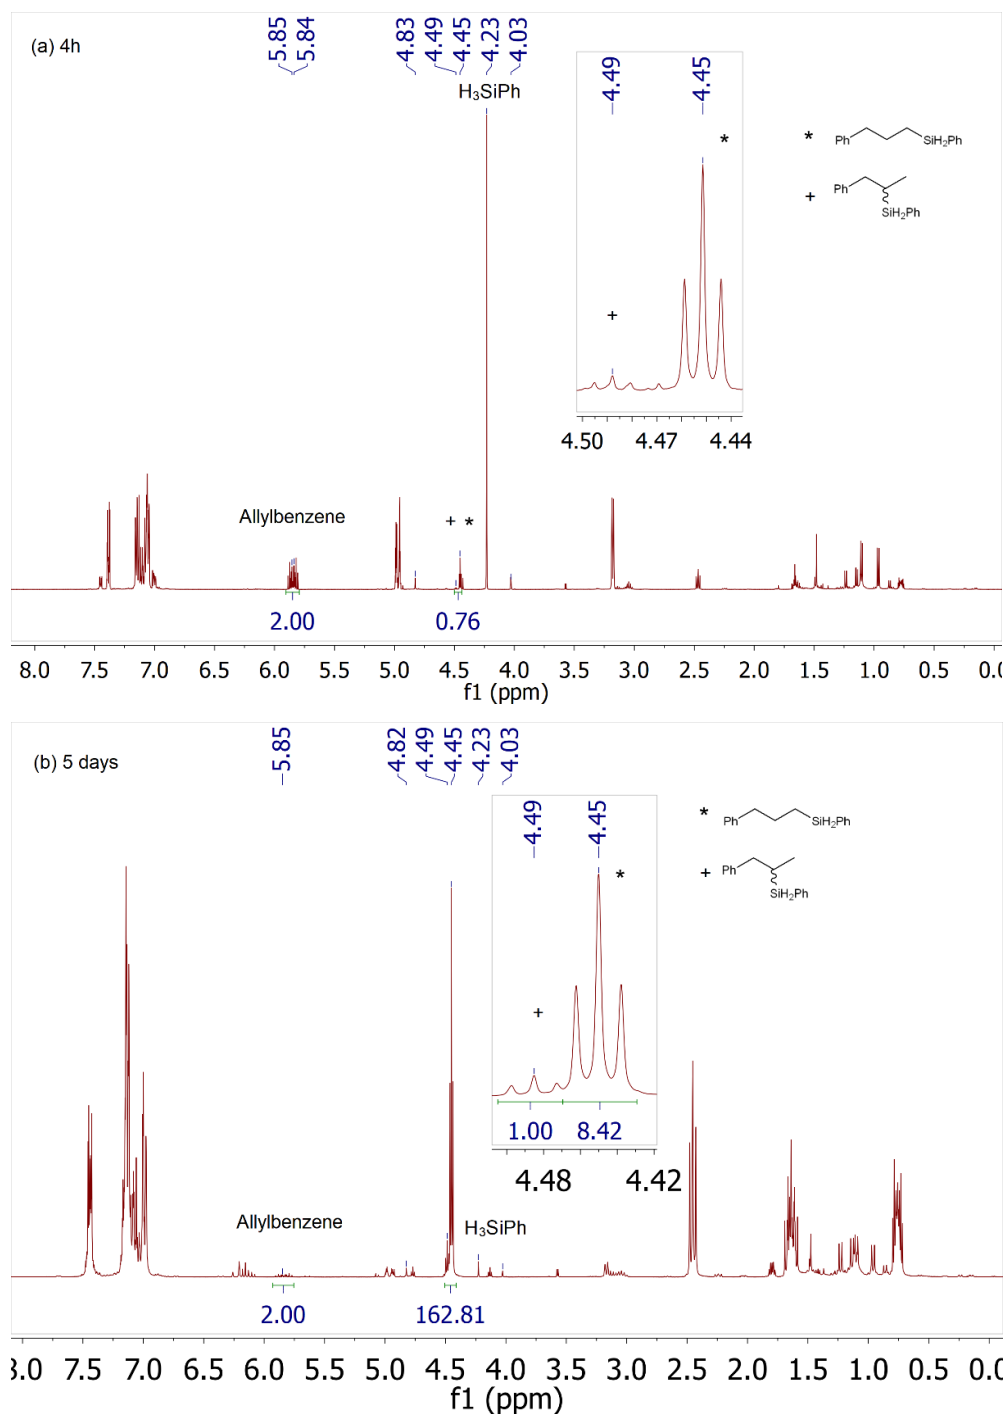

**Figure S29.** <sup>1</sup>H NMR spectra (300 MHz) of catalytic hydrosilylation of allylbenzene (0.111 mmol) mediated by [(BDI)MgH]<sub>2</sub> (5%) in C<sub>6</sub>D<sub>6</sub> (0.4 mL) after (a) 4 hours and (b) 5 days at 80°C. Assignment of major species: [(BDI)MgH]<sub>2</sub>: (BDI methine = 4.83, MgH = 4.03 ppm) in 1:1 ratio. H<sub>3</sub>SiPh: (H<sub>3</sub>Si = 4.23 ppm). Allylbenzene: (CH=CH<sub>2</sub> = 5.85 ppm). Ph(CH<sub>2</sub>)<sub>3</sub>SiH<sub>2</sub>Ph: (H<sub>2</sub>Si = 4.45 ppm). PhCH<sub>2</sub>CH(SiH<sub>2</sub>Ph)CH<sub>3</sub>: (H<sub>2</sub>Si = 4.49 ppm).

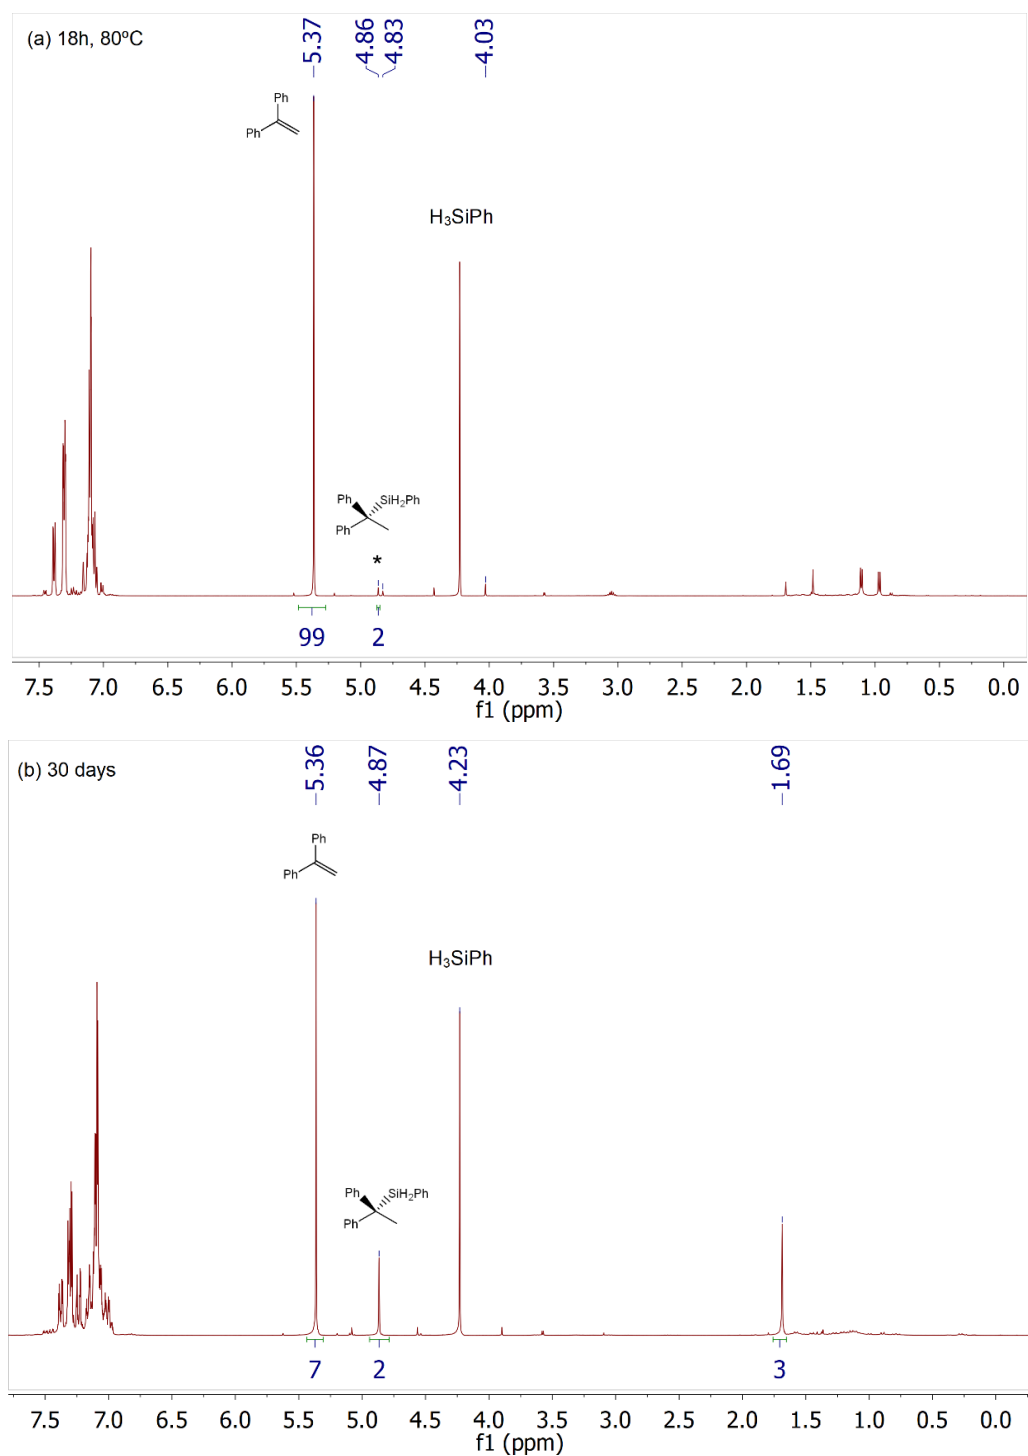

**Figure S30.**  $^1\text{H}$  NMR spectra (300 MHz) of catalytic hydrosilylation of 1,1-diphenylethylene (0.107 mmol) mediated by  $[(\text{BDI})\text{MgH}]_2$  (5%) in  $\text{C}_6\text{D}_6$  (0.4 mL) after (a) 18 h and (b) 30 days at  $80^\circ\text{C}$ . Assignment of major species:  $[(\text{BDI})\text{MgH}]_2$ : (BDI methine = 4.83,  $\text{MgH}$  = 4.03 ppm) in 1:1 ratio.  $\text{H}_3\text{SiPh}$ : ( $\text{H}_3\text{Si}$  = 4.23 ppm). Diphenylethylene: ( $\text{CH}_2$  = 5.37 ppm).  $\text{Ph}_2\text{C}(\text{SiH}_2\text{Ph})\text{CH}_3$ : ( $\text{H}_2\text{Si}$  = 4.87 ppm).



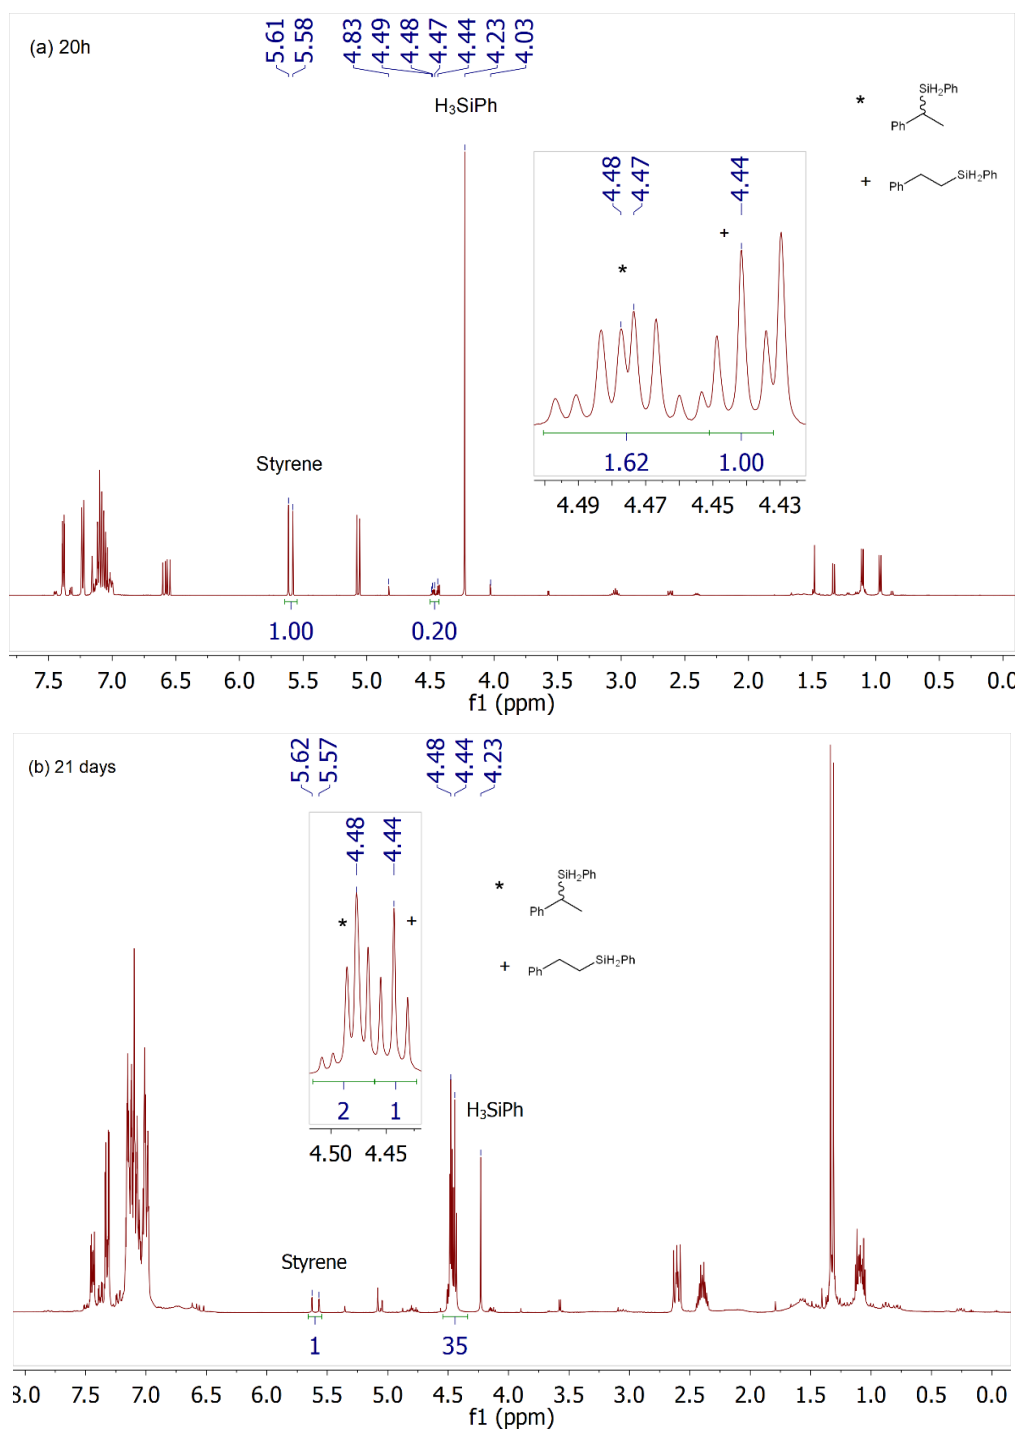

**Figure S31.** <sup>1</sup>H NMR spectra (300 MHz) of catalytic hydrosilylation of styrene (0.106 mmol) mediated by [(BDI)MgH]<sub>2</sub> (5%) in C<sub>6</sub>D<sub>6</sub> (0.4 mL) after (a) 20 hours and (b) 21 days at 80°C. Assignment of major species: [(BDI)MgH]<sub>2</sub>: (BDI methine = 4.83, MgH = 4.03 ppm) in 1:1 ratio. H<sub>3</sub>SiPh: (H<sub>3</sub>Si = 4.23 ppm). Styrene: (CH=CH<sub>2</sub> = 5.60 ppm). PhCH(SiH<sub>2</sub>Ph)CH<sub>3</sub>: (H<sub>2</sub>Si = 4.48 ppm). Ph(CH<sub>2</sub>)<sub>2</sub>SiH<sub>2</sub>Ph: (H<sub>2</sub>Si = 4.44 ppm).

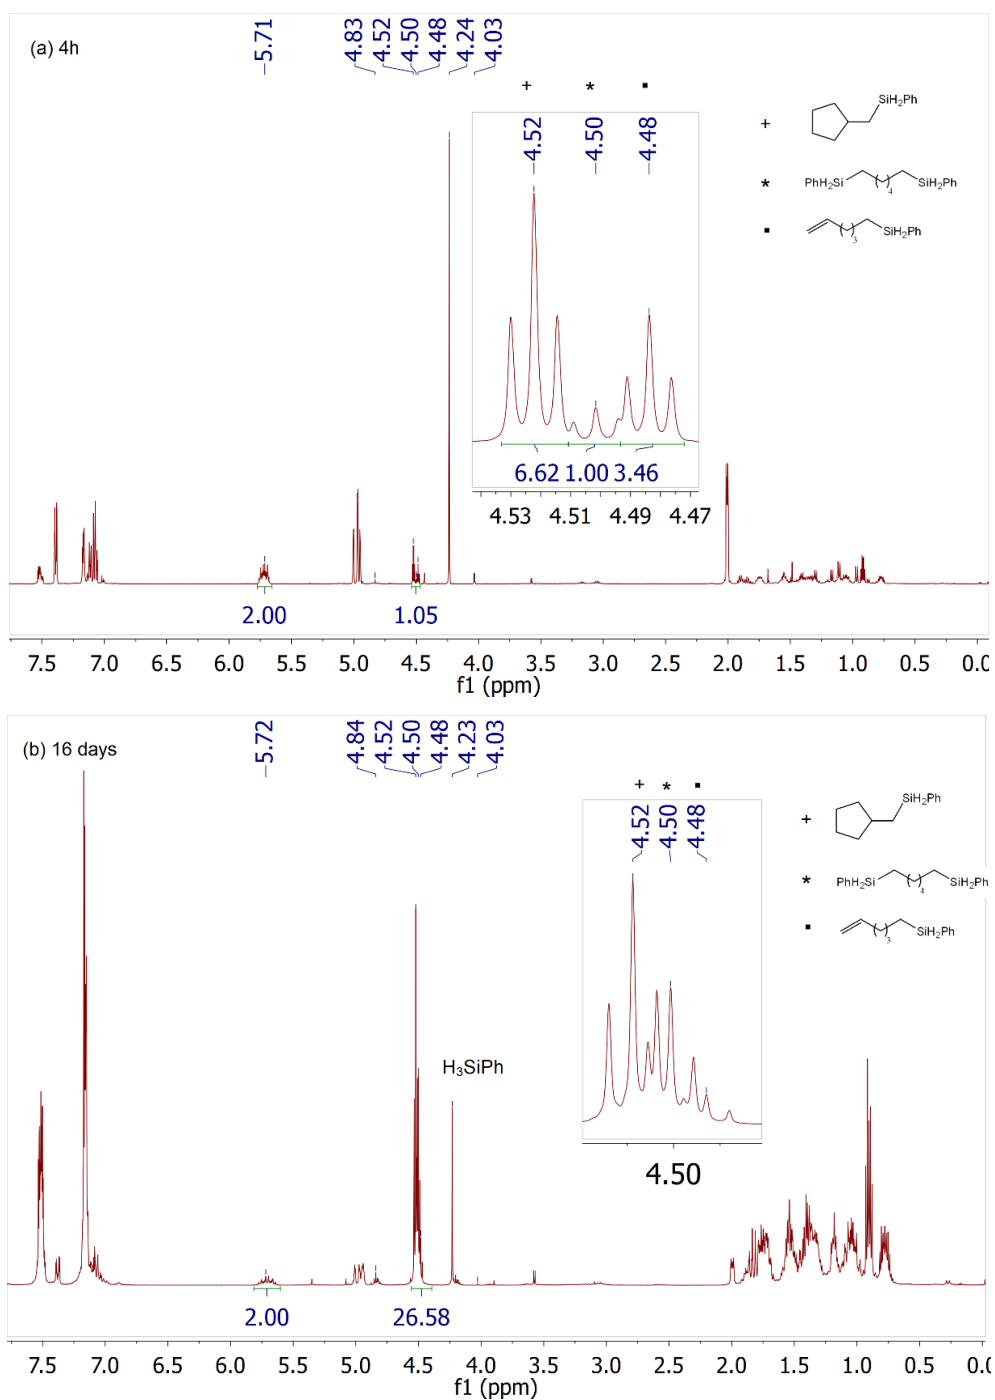

**Figure S32.**  $^1\text{H}$  NMR spectra (300 MHz) of catalytic hydrosilylation of 1,5-hexadiene (0.109 mmol) mediated by  $[(\text{BDI})\text{MgH}]_2$  (5%) in  $\text{C}_6\text{D}_6$  (0.4 mL) after (a) 4 hours and (b) 16 days at  $80^\circ\text{C}$ . Assignment of major species:  $[(\text{BDI})\text{MgH}]_2$ : (BDI methine = 4.84,  $\text{MgH}$  = 4.03 ppm) in 1:1 ratio.  $\text{H}_3\text{SiPh}$ : ( $\text{H}_3\text{Si}$  = 4.24 ppm). 1,5-Hexadiene: ( $\text{CH}=\text{CH}_2$  = 5.72 ppm).  $(\text{CH}_2)_4\text{CHCH}_2\text{SiH}_2\text{Ph}$ : ( $\text{H}_2\text{Si}$  = 4.52 ppm).  $\text{PhH}_2\text{Si}(\text{CH}_2)_6\text{SiH}_2\text{Ph}$ : ( $\text{H}_2\text{Si}$  = 4.50 ppm).  $\text{CH}_2=\text{CH}(\text{CH}_2)_4\text{SiH}_2\text{Ph}$ : ( $\text{H}_2\text{Si}$  = 4.48 ppm).

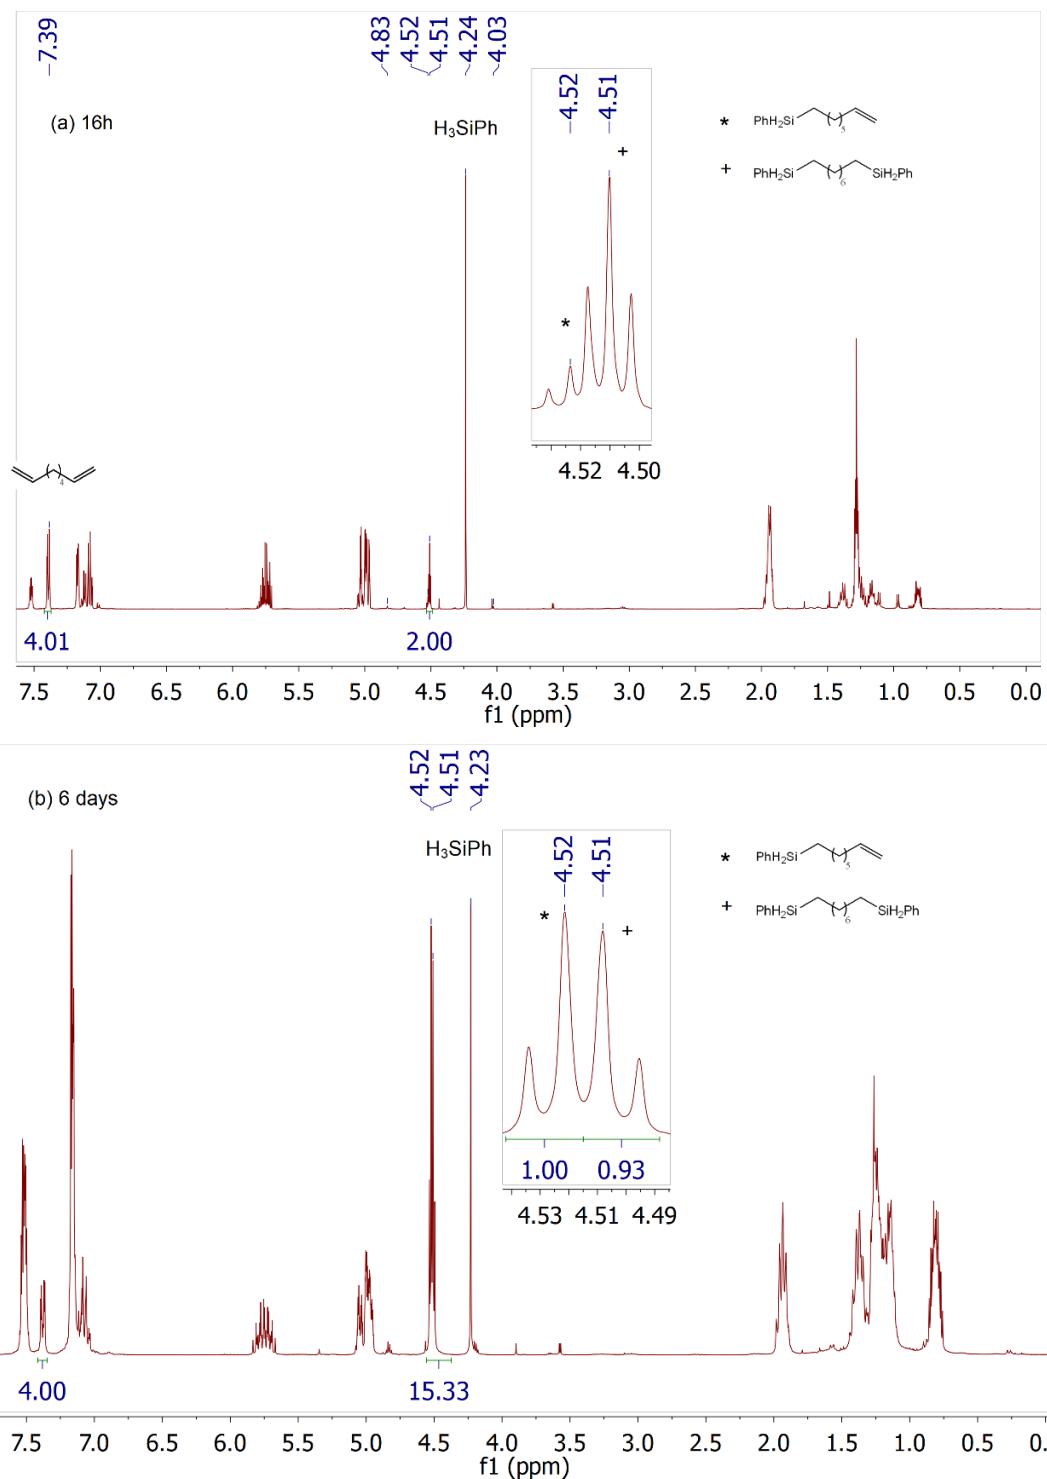

**Figure S33.**  $^1\text{H}$  NMR spectra (300 MHz) of catalytic hydrosilylation of 1,7-octadiene (0.106 mmol) mediated by  $[(\text{BDI})\text{MgH}]_2$  (5%) in  $\text{C}_6\text{D}_6$  (0.4 mL) after (a) 16 hours and (b) 6 days at  $80^\circ\text{C}$ . Assignment of major species:  $[(\text{BDI})\text{MgH}]_2$ : (BDI methine = 4.83,  $\text{MgH}$  = 4.03 ppm) in 1:1 ratio.  $\text{H}_3\text{SiPh}$ : ( $\text{H}_3\text{Si}$  = 4.24 ppm). 1,7-octadiene: ( $\text{CH}=\text{CH}_2$  = 7.39 ppm).  $\text{PhH}_2\text{Si}(\text{CH}_2)_6\text{CH}=\text{CH}_2$ : ( $\text{H}_2\text{Si}$  = 4.52 ppm).  $\text{PhH}_2\text{Si}(\text{CH}_2)_8\text{SiH}_2\text{Ph}$ : ( $\text{H}_2\text{Si}$  = 4.51 ppm).

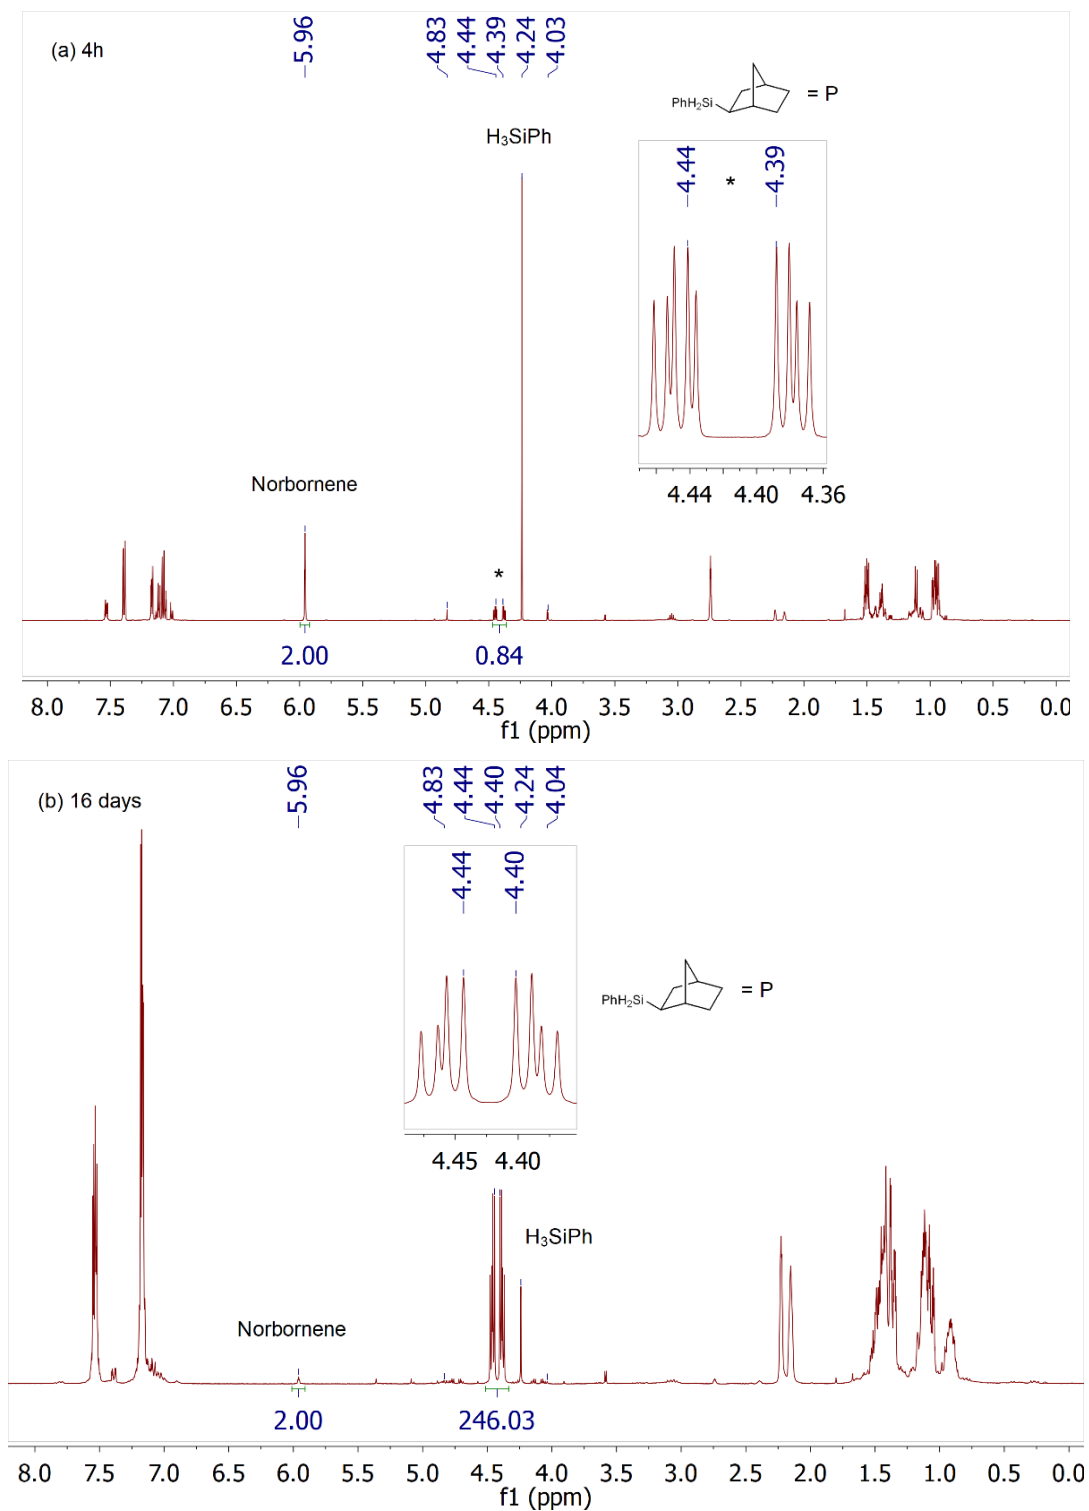

**Figure S34.** <sup>1</sup>H NMR spectra (300 MHz) of catalytic hydrosilylation of norbornene (0.106 mmol) mediated by [(BDI)MgH]<sub>2</sub> (5%) in C<sub>6</sub>D<sub>6</sub> (0.4 mL) after (a) 4 hours and (b) 16 days at 80°C. Assignment of major species: [(BDI)MgH]<sub>2</sub>: (BDI methine = 4.83, MgH = 4.03 ppm) in 1:1 ratio. H<sub>3</sub>SiPh: (H<sub>3</sub>Si = 4.24 ppm). Norbornene: (CH=CH = 5.96 ppm). P: (H<sub>2</sub>Si = 4.42 ppm).

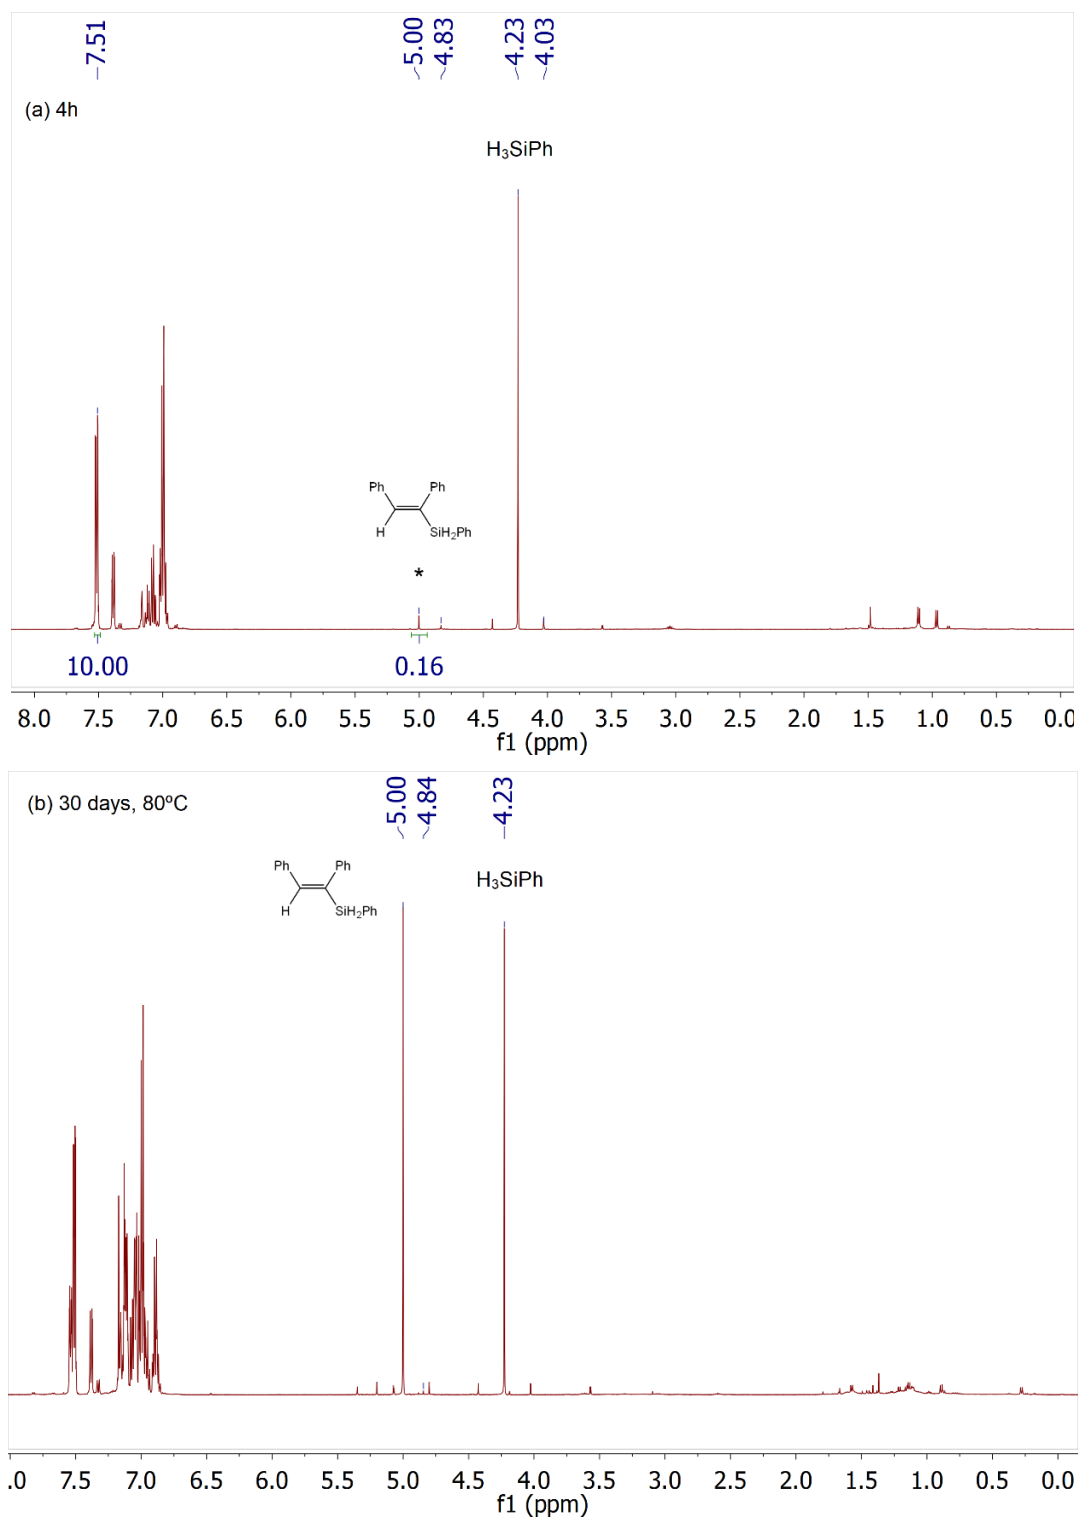

**Figure S35.** Stacked  $^1\text{H}$  NMR spectra (300 MHz) of catalytic hydrosilylation of diphenylacetylene (0.107 mmol) mediated by  $[(\text{BDI})\text{MgH}]_2$  (5%) in  $\text{C}_6\text{D}_6$  (0.4 mL) after (a) 4 hours and (b) 30 days at  $80^\circ\text{C}$ . Assignment of major species:  $[(\text{BDI})\text{MgH}]_2$ : (BDI methine = 4.83,  $\text{MgH}$  = 4.03 ppm) in 1:1 ratio.  $\text{H}_3\text{SiPh}$ : ( $\text{H}_3\text{Si}$  = 4.23 ppm). Diphenylacetylene: ( $\text{CH Ph}$  = 7.51 ppm).  $\text{PhHC}=\text{CPh}(\text{SiH}_2\text{Ph})$ : ( $\text{H}_2\text{Si}$  = 5.00 ppm).

### Single Crystal X-Ray Diffraction Analysis

Single Crystals X-ray diffraction data for compounds **12** and **15** were collected on a SuperNova, Dual Cu at zero, EosS2 diffractometer. The crystals were kept at 150.00(10) K during data collection. Using Olex2,<sup>2</sup> the structures were solved via the olex2.solve<sup>3</sup> structure solution program using Charge Flipping and refined with the ShelXL<sup>4</sup> refinement package using Least Squares minimisation.

The asymmetric unit in **12** comprises 2 molecules. Disorder over 2 sites was modelled for C16 (60:40 ratio), C30-31 (90:10 ratio) and C65-67 (75:25). Chemically comparative bonds involving fractional occupancy carbon atoms were restrained to being similar in distance during the final least squares, and ADP restraints were also included in disordered regions, to assist convergence.

The asymmetric unit in **15** contains half of one molecule, with Mg1, C2, H2, C16 and H16 located coincident with a crystallographic mirror plane. As such the norbornane ligand is disordered with itself, and the atoms therein are present in the asymmetric unit at half site-occupancy. Unsurprisingly, perhaps, C14 and C15 in the isopropyl group most proximate to the norbornane is also disordered over 2 adjacent sites, and was thus modelled, in a 50:50 ratio. H16 was located and refined subject to being bonded to C16 at a distance of 0.98 Å.

**Table S1.** Single Crystal X-ray Data Parameters for compounds **12** and **15**.

| Compound                                                     | <b>12</b>                                                                     | <b>15</b>                                                                    |
|--------------------------------------------------------------|-------------------------------------------------------------------------------|------------------------------------------------------------------------------|
| Empirical formula                                            | C <sub>35</sub> H <sub>52</sub> MgN <sub>2</sub>                              | C <sub>36</sub> H <sub>52</sub> MgN <sub>2</sub>                             |
| Formula weight                                               | 525.09                                                                        | 537.10                                                                       |
| Temperature/K                                                | 150.00(10)                                                                    | 150.15(10)                                                                   |
| Crystal system                                               | monoclinic                                                                    | orthorhombic                                                                 |
| Space group                                                  | <i>P2</i> <sub>1</sub> / <i>c</i>                                             | <i>Pnma</i>                                                                  |
| <i>a</i> /Å                                                  | 19.0530(3)                                                                    | 18.7502(3)                                                                   |
| <i>b</i> /Å                                                  | 20.7671(2)                                                                    | 20.6951(4)                                                                   |
| <i>c</i> /Å                                                  | 17.0951(2)                                                                    | 8.5719(2)                                                                    |
| $\alpha$ /°                                                  | 90                                                                            | 90                                                                           |
| $\beta$ /°                                                   | 103.4030(10)                                                                  | 90                                                                           |
| $\gamma$ /°                                                  | 90                                                                            | 90                                                                           |
| Volume/Å <sup>3</sup>                                        | 6579.88(15)                                                                   | 3326.22(11)                                                                  |
| <i>Z</i>                                                     | 8                                                                             | 4                                                                            |
| $\rho_{\text{calc}}$ g/cm <sup>3</sup>                       | 1.060                                                                         | 1.073                                                                        |
| $\mu$ /mm <sup>-1</sup>                                      | 0.625                                                                         | 0.629                                                                        |
| F(000)                                                       | 2304.0                                                                        | 1176.0                                                                       |
| Crystal size/mm <sup>3</sup>                                 | 0.203 × 0.136 × 0.061                                                         | 0.144 × 0.075 × 0.068                                                        |
| Radiation                                                    | CuK $\alpha$ ( $\lambda$ = 1.54184)                                           | CuK $\alpha$ ( $\lambda$ = 1.54184)                                          |
| 2 $\Theta$ range for data collection/°                       | 6.392 to 146.952                                                              | 8.546 to 146.72                                                              |
| Index ranges                                                 | -18 ≤ <i>h</i> ≤ 23, -21 ≤ <i>k</i> ≤ 25, -21 ≤ <i>l</i> ≤ 19                 | -21 ≤ <i>h</i> ≤ 23, -25 ≤ <i>k</i> ≤ 25, -7 ≤ <i>l</i> ≤ 10                 |
| Reflections collected                                        | 51062                                                                         | 28832                                                                        |
| Independent reflections                                      | 13116 [ <i>R</i> <sub>int</sub> = 0.0391, <i>R</i> <sub>sigma</sub> = 0.0405] | 3443 [ <i>R</i> <sub>int</sub> = 0.0511, <i>R</i> <sub>sigma</sub> = 0.0255] |
| Data/restraints/parameters                                   | 13116/23/749                                                                  | 3443/3/236                                                                   |
| Goodness-of-fit on F <sup>2</sup>                            | 1.043                                                                         | 1.053                                                                        |
| Final <i>R</i> indexes [ <i>I</i> ≥ 2 $\sigma$ ( <i>I</i> )] | <i>R</i> <sub>1</sub> = 0.0511, <i>wR</i> <sub>2</sub> = 0.1390               | <i>R</i> <sub>1</sub> = 0.0466, <i>wR</i> <sub>2</sub> = 0.1164              |
| Final <i>R</i> indexes [all data]                            | <i>R</i> <sub>1</sub> = 0.0760, <i>wR</i> <sub>2</sub> = 0.1563               | <i>R</i> <sub>1</sub> = 0.0598, <i>wR</i> <sub>2</sub> = 0.1232              |
| Largest diff. peak/hole / e Å <sup>-3</sup>                  | 0.42/-0.41                                                                    | 0.31/-0.21                                                                   |

### **Computational studies**

Calculations were carried out using the Gaussian09 package<sup>5</sup> at the DFT level by means of the hybrid density functional B3PW91.<sup>6</sup> A triple-zeta 6-311G basis set augmented by a polarisation and diffuse function was used for the Mg atom. Polarized all electron triple-zeta 6-311G(d,p) basis set were used for N, whereas a polarised all electron double-zeta 6-31G(d) basis set were used for the C and H atoms. The nature of the optimised stationary point, minima or transition state, has been verified by means of analytical frequency calculation at 298.15 K and 1 atm. The geometry optimisations have been achieved without any geometrical constraints. IRC calculations were carried out in order to confirm the connectivity between reactant(s), transition state and product(s). Energy data are reported in the gas phase.



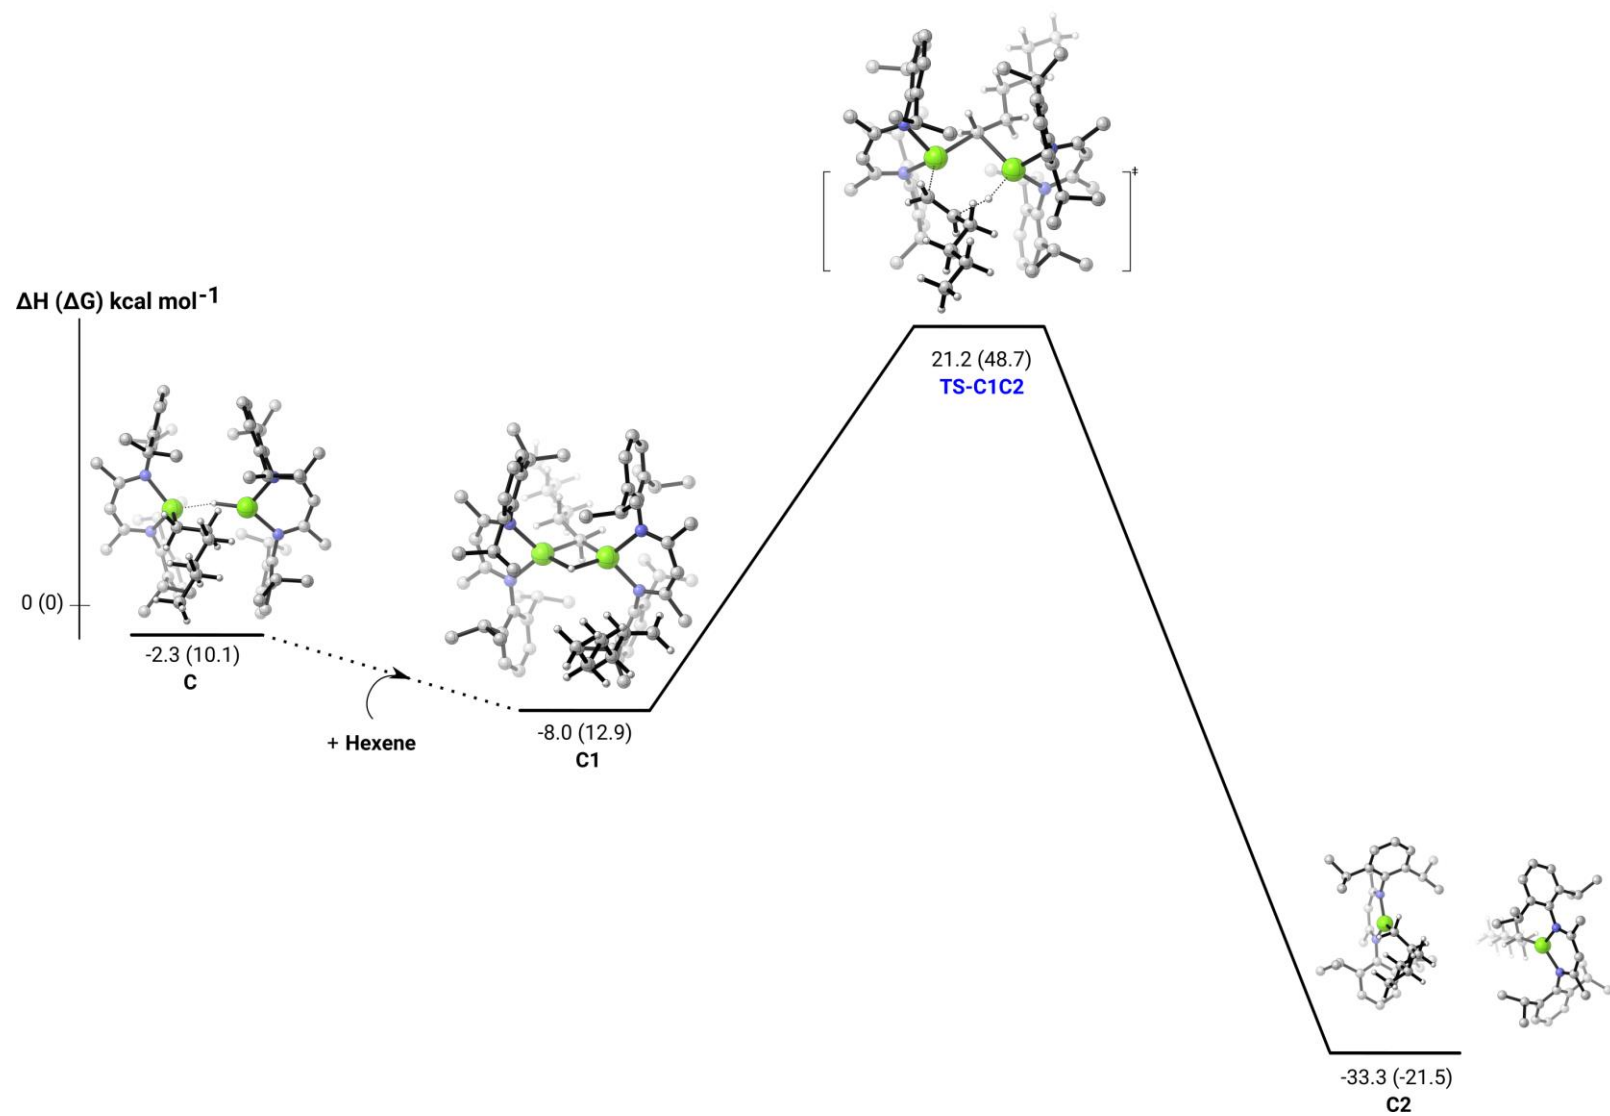

**Figure S36.** DFT (B3PW91) computed enthalpy reaction profile at room temperature for the second Mg-H/C=C 1-hexene insertion into the dimagnesium hydrido-*n*-hexyl species (**C**).

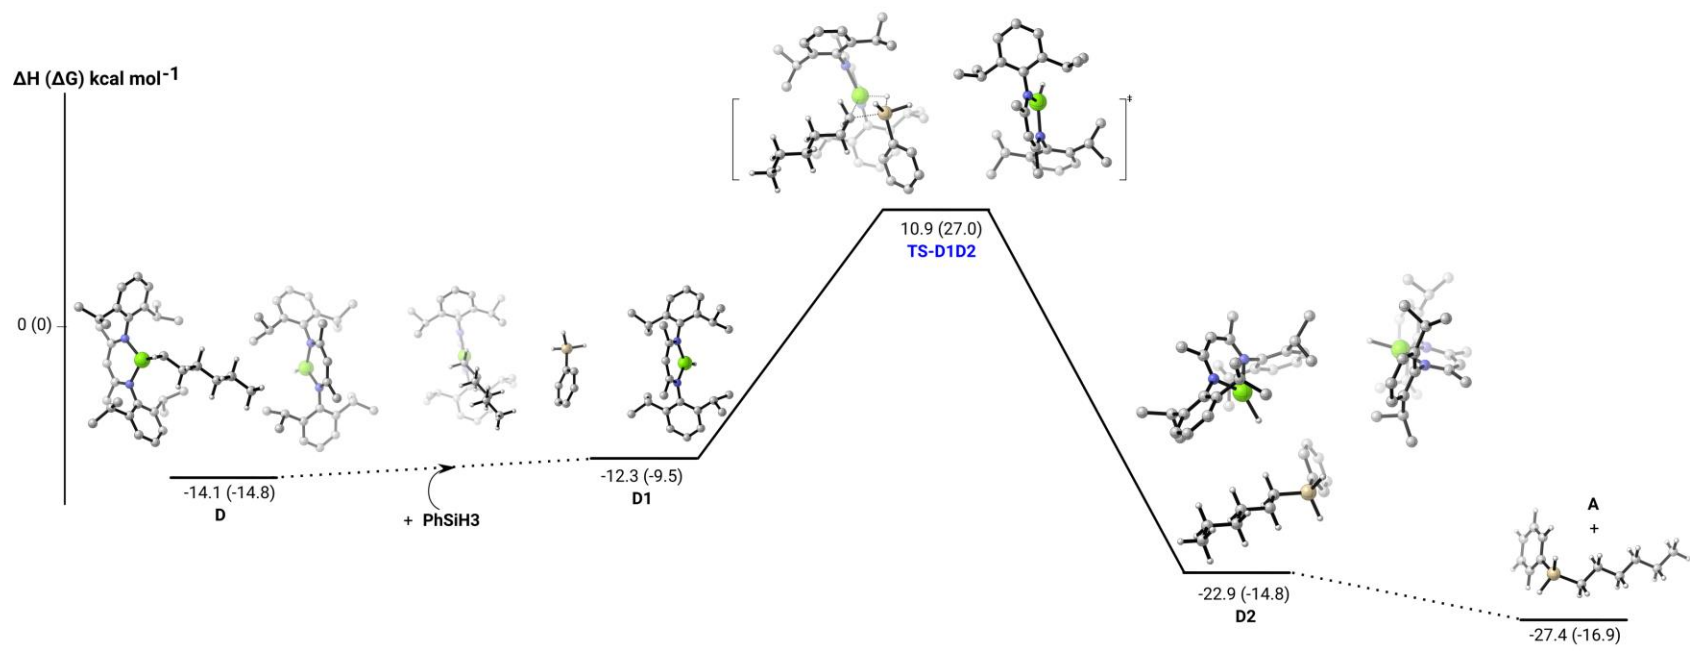

**Figure S37.** DFT (B3PW91) computed enthalpy reaction profile at room temperature for the Mg-C/Si-H metathesis process starting from complex D.

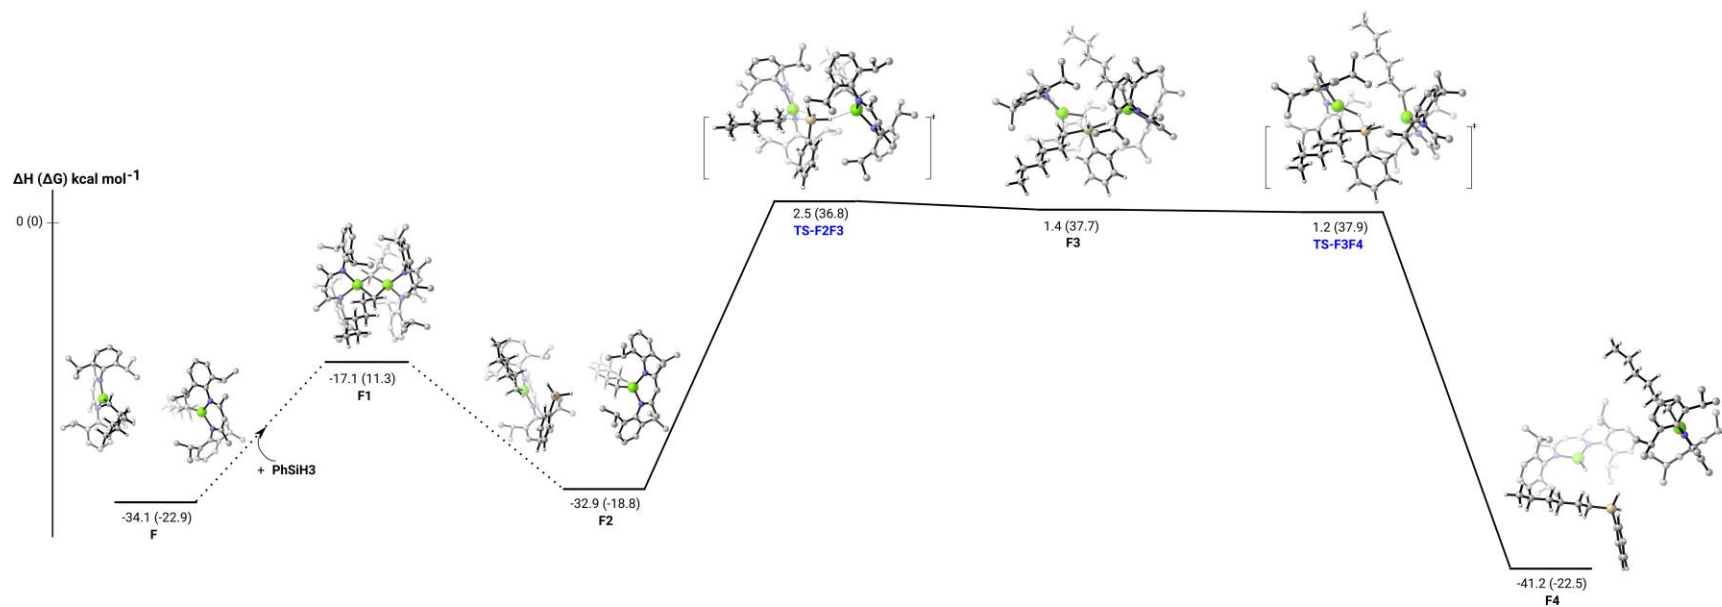

**Figure S38.** DFT (B3PW91) computed enthalpy reaction profile at room temperature for the Mg-C/Si-H metathesis process starting from the dimagnesium di-*n*-hexyl complex **F1**.

Cartesian Coordinates and Computed Energies (in Hartrees)

148

[A] scf done: -2879.147081 / Energies= -2877.777664 / Enthalpies= -2877.776719 /  
Free Energies= -2877.960296

|    |           |           |           |
|----|-----------|-----------|-----------|
| C  | 22.618155 | 22.181070 | 2.678863  |
| C  | 23.571517 | 21.219743 | 3.090397  |
| C  | 24.873550 | 21.618010 | 3.475026  |
| C  | 25.175634 | 22.982743 | 3.498806  |
| C  | 24.241056 | 23.938304 | 3.115379  |
| C  | 22.979079 | 23.532158 | 2.698461  |
| N  | 23.215416 | 19.830056 | 3.085188  |
| C  | 23.506962 | 19.151893 | 1.972324  |
| C  | 24.288588 | 19.823375 | 0.860020  |
| C  | 25.952798 | 20.601749 | 3.823519  |
| C  | 26.161578 | 20.500674 | 5.336369  |
| C  | 21.238629 | 21.791338 | 2.163332  |
| C  | 20.111974 | 22.347315 | 3.044666  |
| C  | 23.104503 | 17.834118 | 1.700459  |
| C  | 22.162413 | 17.024834 | 2.356443  |
| C  | 21.743912 | 15.784246 | 1.591215  |
| N  | 21.611240 | 17.294042 | 3.542598  |
| C  | 20.542651 | 16.430662 | 3.954863  |
| C  | 19.207268 | 16.787834 | 3.652018  |
| C  | 18.176948 | 15.938200 | 4.067803  |
| C  | 18.442860 | 14.768582 | 4.769773  |
| C  | 19.760346 | 14.419513 | 5.045079  |
| C  | 20.828081 | 15.220531 | 4.629872  |
| C  | 18.860673 | 18.029147 | 2.839428  |
| C  | 17.986603 | 19.014549 | 3.626769  |
| C  | 22.257571 | 14.757143 | 4.875801  |
| C  | 22.686071 | 14.999577 | 6.325080  |
| C  | 18.180166 | 17.662138 | 1.510900  |
| C  | 22.474278 | 13.283378 | 4.501096  |
| C  | 27.289644 | 20.894535 | 3.125758  |
| C  | 21.035206 | 22.228839 | 0.704147  |
| Mg | 22.306369 | 18.889866 | 4.752904  |
| Mg | 22.180509 | 19.505765 | 7.682422  |
| N  | 22.875902 | 21.101419 | 8.892769  |
| C  | 23.944643 | 21.964639 | 8.480560  |
| C  | 25.279974 | 21.607123 | 8.783201  |
| C  | 26.310430 | 22.456674 | 8.367576  |
| C  | 26.044696 | 23.626527 | 7.665936  |
| C  | 24.727259 | 23.975897 | 7.390766  |
| C  | 23.659399 | 23.174969 | 7.805824  |
| C  | 25.626385 | 20.365520 | 9.595427  |
| C  | 26.500419 | 19.380279 | 8.807844  |
| C  | 22.229980 | 23.638638 | 7.559995  |
| C  | 21.801312 | 23.396150 | 6.110773  |
| C  | 22.324666 | 21.370773 | 10.078862 |
| C  | 21.382231 | 20.561777 | 10.734710 |
| C  | 20.979431 | 19.244116 | 10.462810 |
| C  | 20.197375 | 18.572893 | 11.574963 |
| C  | 22.743421 | 22.611238 | 10.844158 |
| N  | 21.271046 | 18.565809 | 9.350049  |
| C  | 20.914734 | 17.176175 | 9.344878  |
| C  | 19.612756 | 16.778043 | 8.959932  |
| C  | 19.310541 | 15.413340 | 8.936053  |
| C  | 20.244922 | 14.457680 | 9.319712  |

|   |           |           |           |
|---|-----------|-----------|-----------|
| C | 21.506807 | 14.863701 | 9.737028  |
| C | 21.867862 | 16.214752 | 9.756737  |
| C | 18.533679 | 17.794410 | 8.611212  |
| C | 18.325119 | 17.895406 | 7.098327  |
| C | 23.247255 | 16.604331 | 10.272756 |
| C | 24.374161 | 16.048314 | 9.391767  |
| C | 26.306813 | 20.732064 | 10.924120 |
| C | 22.013587 | 25.112475 | 7.934587  |
| C | 17.196700 | 17.501801 | 9.308800  |
| C | 23.450144 | 16.166700 | 11.731976 |
| H | 21.184267 | 19.831143 | 6.008927  |
| H | 22.502136 | 23.523271 | 10.289639 |
| H | 22.245719 | 22.656770 | 11.815059 |
| H | 23.825287 | 22.625114 | 11.007860 |
| H | 21.018426 | 20.961558 | 11.673552 |
| H | 20.722424 | 17.684057 | 11.939013 |
| H | 20.050011 | 19.254776 | 12.415101 |
| H | 19.217378 | 18.232614 | 11.228541 |
| H | 24.687953 | 19.855268 | 9.836651  |
| H | 25.691529 | 21.411231 | 11.524015 |
| H | 26.489818 | 19.829738 | 11.520328 |
| H | 27.274220 | 21.220758 | 10.757028 |
| H | 27.449173 | 19.839643 | 8.504999  |
| H | 26.738723 | 18.505141 | 9.424310  |
| H | 25.992761 | 19.030225 | 7.904060  |
| H | 27.340470 | 22.196170 | 8.601386  |
| H | 26.860020 | 24.271378 | 7.346499  |
| H | 24.522296 | 24.900396 | 6.857411  |
| H | 21.571466 | 23.038066 | 8.196519  |
| H | 20.946683 | 25.359846 | 7.880760  |
| H | 22.363431 | 25.336541 | 8.948871  |
| H | 22.537092 | 25.788137 | 7.247975  |
| H | 21.872919 | 22.336950 | 5.844976  |
| H | 20.761314 | 23.711550 | 5.960586  |
| H | 22.432500 | 23.955521 | 5.412949  |
| H | 18.876883 | 18.775829 | 8.955704  |
| H | 16.725341 | 16.592155 | 8.918550  |
| H | 17.312759 | 17.374993 | 10.391391 |
| H | 16.496587 | 18.328194 | 9.137791  |
| H | 17.563936 | 18.650337 | 6.865493  |
| H | 19.249442 | 18.181527 | 6.587053  |
| H | 17.997587 | 16.938873 | 6.678908  |
| H | 18.318558 | 15.094272 | 8.627630  |
| H | 19.984923 | 13.401820 | 9.307350  |
| H | 22.229111 | 14.116531 | 10.058701 |
| H | 23.315043 | 17.696981 | 10.245323 |
| H | 23.433389 | 15.074499 | 11.829668 |
| H | 24.420844 | 16.517125 | 12.103511 |
| H | 22.673288 | 16.570019 | 12.390481 |
| H | 24.308583 | 16.432737 | 8.369458  |
| H | 25.352031 | 16.331999 | 9.799162  |
| H | 24.340430 | 14.953191 | 9.342336  |
| H | 23.302585 | 18.564536 | 6.426283  |
| H | 21.984966 | 14.872308 | 2.145983  |
| H | 22.241950 | 15.738539 | 0.620494  |
| H | 20.662104 | 15.770379 | 1.427124  |
| H | 23.468274 | 17.434464 | 0.761549  |
| H | 23.763394 | 20.712278 | 0.496346  |
| H | 24.435661 | 19.141667 | 0.019689  |
| H | 25.268713 | 20.163598 | 1.206145  |

|   |           |           |          |
|---|-----------|-----------|----------|
| H | 19.799034 | 18.539421 | 2.597978 |
| H | 18.795402 | 16.982755 | 0.911198 |
| H | 17.997135 | 18.564259 | 0.914389 |
| H | 17.212762 | 17.173514 | 1.678209 |
| H | 17.037894 | 18.555195 | 3.929774 |
| H | 17.748214 | 19.889496 | 3.010063 |
| H | 18.494269 | 19.364886 | 4.530439 |
| H | 17.146875 | 16.198459 | 3.833866 |
| H | 17.627636 | 14.123667 | 5.089338 |
| H | 19.965458 | 13.495174 | 5.578659 |
| H | 22.916009 | 15.357910 | 4.239379 |
| H | 23.541217 | 13.036181 | 4.555048 |
| H | 22.124614 | 13.059347 | 3.486744 |
| H | 21.950783 | 12.607568 | 5.187570 |
| H | 22.614163 | 16.058728 | 6.590987 |
| H | 23.726144 | 14.684437 | 6.475303 |
| H | 22.054982 | 14.439959 | 7.022795 |
| H | 25.609663 | 19.620312 | 3.479014 |
| H | 27.760967 | 21.804216 | 3.515975 |
| H | 27.173415 | 21.021368 | 2.043188 |
| H | 27.989871 | 20.068211 | 3.296632 |
| H | 26.922845 | 19.745779 | 5.569039 |
| H | 25.237350 | 20.214461 | 5.847768 |
| H | 26.489132 | 21.457197 | 5.755795 |
| H | 26.167667 | 23.301916 | 3.806963 |
| H | 24.500958 | 24.994190 | 3.127643 |
| H | 22.256602 | 24.279254 | 2.377013 |
| H | 21.170950 | 20.698684 | 2.190870 |
| H | 21.051840 | 23.321036 | 0.606369 |
| H | 20.064410 | 21.878312 | 0.332961 |
| H | 21.811873 | 21.825533 | 0.045412 |
| H | 20.178022 | 21.963069 | 4.067011 |
| H | 19.133994 | 22.063389 | 2.637704 |
| H | 20.145532 | 23.442453 | 3.093893 |

166

[B] scf done: -3114.906809 / Energies= -3113.359810 / Enthalpies= -3113.358866 / Free Energies= -3113.571399

|   |           |           |           |
|---|-----------|-----------|-----------|
| C | 2.823426  | 1.535891  | -3.209186 |
| C | 1.462976  | 1.911801  | -3.302696 |
| C | 1.088994  | 3.276220  | -3.259961 |
| C | 2.083493  | 4.234299  | -3.043421 |
| C | 3.420615  | 3.874448  | -2.915613 |
| C | 3.781535  | 2.536097  | -3.013940 |
| N | 0.461479  | 0.898748  | -3.468525 |
| C | 0.121033  | 0.603699  | -4.725089 |
| C | 0.716860  | 1.393674  | -5.873728 |
| C | -0.349473 | 3.719984  | -3.491638 |
| C | -0.454797 | 4.887695  | -4.483994 |
| C | 3.281172  | 0.091642  | -3.372221 |
| C | 4.258796  | -0.064389 | -4.547981 |
| C | -0.736065 | -0.441426 | -5.106516 |
| C | -1.240292 | -1.514069 | -4.353592 |
| C | -1.888985 | -2.617819 | -5.165392 |
| N | -1.149325 | -1.631040 | -3.026612 |
| C | -1.570295 | -2.883445 | -2.468606 |
| C | -2.928067 | -3.087913 | -2.127455 |
| C | -3.292467 | -4.300186 | -1.534413 |
| C | -2.361168 | -5.309941 | -1.319701 |
| C | -1.040893 | -5.117770 | -1.709260 |
| C | -0.619647 | -3.915782 | -2.287156 |

|    |           |           |           |
|----|-----------|-----------|-----------|
| C  | -3.997202 | -2.047485 | -2.433498 |
| C  | -5.227354 | -2.654330 | -3.125289 |
| C  | 0.825166  | -3.783759 | -2.753795 |
| C  | 1.177371  | -4.843603 | -3.810017 |
| C  | -4.425505 | -1.284493 | -1.177570 |
| C  | 1.822860  | -3.850726 | -1.589541 |
| C  | -1.052596 | 4.077600  | -2.179971 |
| C  | 3.906681  | -0.469475 | -2.088198 |
| Mg | -0.440784 | -0.052754 | -1.803467 |
| Mg | -0.701512 | 0.619289  | 1.109566  |
| N  | -1.581427 | -0.345288 | 2.779816  |
| C  | -1.224934 | -0.052905 | 4.032380  |
| C  | -0.384412 | 1.008843  | 4.406564  |
| C  | 0.077685  | 2.101461  | 3.652428  |
| N  | -0.022908 | 2.215442  | 2.326802  |
| C  | 0.367598  | 3.476383  | 1.764728  |
| C  | 1.724876  | 3.720237  | 1.446836  |
| C  | 2.062952  | 4.941488  | 0.856909  |
| C  | 1.105174  | 5.921344  | 0.620038  |
| C  | -0.216149 | 5.688900  | 0.982465  |
| C  | -0.611455 | 4.476276  | 1.556971  |
| C  | 2.818350  | 2.710717  | 1.769138  |
| C  | 4.037358  | 3.352863  | 2.447989  |
| C  | -2.060752 | 4.302634  | 1.994824  |
| C  | -2.449680 | 5.328174  | 3.072113  |
| C  | -2.583511 | -1.359626 | 2.623357  |
| C  | -2.210065 | -2.722992 | 2.559118  |
| C  | -3.207460 | -3.679563 | 2.348761  |
| C  | -4.546623 | -3.319748 | 2.246698  |
| C  | -4.906647 | -1.982883 | 2.367386  |
| C  | -3.946246 | -0.984261 | 2.559287  |
| C  | -0.768206 | -3.169829 | 2.759438  |
| C  | -0.644498 | -4.335716 | 3.752023  |
| C  | -4.404205 | 0.456129  | 2.753994  |
| C  | -5.351318 | 0.590535  | 3.957309  |
| C  | -1.781605 | -0.865367 | 5.184848  |
| C  | -5.065682 | 1.034023  | 1.495892  |
| C  | -0.097670 | -3.534021 | 1.432813  |
| C  | 0.690818  | 3.225839  | 4.463744  |
| C  | 3.259088  | 1.935690  | 0.525088  |
| C  | -3.041068 | 4.380465  | 0.816698  |
| C  | 3.623201  | -0.656702 | 4.483047  |
| C  | 4.192900  | -1.202610 | 3.406966  |
| C  | 5.604977  | -1.704619 | 3.331328  |
| C  | 5.690349  | -3.200326 | 2.995192  |
| C  | 7.126619  | -3.709813 | 2.868354  |
| C  | 7.207555  | -5.197226 | 2.531724  |
| H  | 0.489161  | -0.346924 | -0.131261 |
| H  | -1.628536 | 0.912048  | -0.561858 |
| H  | 1.731052  | 3.405633  | 4.176272  |
| H  | 0.155304  | 4.165251  | 4.294993  |
| H  | 0.662202  | 2.998061  | 5.531386  |
| H  | -0.183667 | 1.074855  | 5.469153  |
| H  | -2.873978 | -0.798421 | 5.214217  |
| H  | -1.538870 | -1.927091 | 5.083750  |
| H  | -1.388770 | -0.509320 | 6.139559  |
| H  | 2.404012  | 1.979996  | 2.471255  |
| H  | 3.754146  | 3.969250  | 3.309128  |
| H  | 4.719050  | 2.570184  | 2.800136  |
| H  | 4.600179  | 3.991053  | 1.756384  |

|   |           |           |           |
|---|-----------|-----------|-----------|
| H | 3.683396  | 2.605642  | -0.229647 |
| H | 4.018974  | 1.190613  | 0.790383  |
| H | 2.417987  | 1.409467  | 0.063273  |
| H | 3.099432  | 5.135364  | 0.593995  |
| H | 1.391568  | 6.869417  | 0.170888  |
| H | -0.958889 | 6.467389  | 0.822228  |
| H | -2.157185 | 3.306353  | 2.439507  |
| H | -3.470967 | 5.140743  | 3.425752  |
| H | -1.781387 | 5.284669  | 3.938866  |
| H | -2.417766 | 6.351861  | 2.679941  |
| H | -2.849276 | 3.591312  | 0.083860  |
| H | -4.072646 | 4.270215  | 1.172069  |
| H | -2.970047 | 5.344849  | 0.299366  |
| H | -3.516465 | 1.061216  | 2.966656  |
| H | -6.290598 | 0.048780  | 3.793173  |
| H | -4.901435 | 0.200691  | 4.876894  |
| H | -5.603272 | 1.644526  | 4.126781  |
| H | -5.397075 | 2.063448  | 1.678276  |
| H | -4.373608 | 1.046277  | 0.648628  |
| H | -5.945594 | 0.448817  | 1.202628  |
| H | -5.957614 | -1.706174 | 2.318522  |
| H | -5.307937 | -4.080930 | 2.093295  |
| H | -2.931397 | -4.728502 | 2.280111  |
| H | -0.213380 | -2.324010 | 3.178903  |
| H | -1.070439 | -5.261783 | 3.348396  |
| H | 0.412502  | -4.531660 | 3.967841  |
| H | -1.150683 | -4.125982 | 4.701424  |
| H | -0.100224 | -2.686786 | 0.740186  |
| H | 0.945433  | -3.830404 | 1.599293  |
| H | -0.615442 | -4.363913 | 0.940995  |
| H | -2.930219 | -2.773687 | -4.867485 |
| H | -1.376017 | -3.571909 | -5.008771 |
| H | -1.866005 | -2.383868 | -6.231842 |
| H | -0.930317 | -0.503170 | -6.170504 |
| H | 0.325511  | 1.045068  | -6.831811 |
| H | 1.806880  | 1.290331  | -5.888441 |
| H | 0.508910  | 2.463444  | -5.781372 |
| H | -3.560639 | -1.316057 | -3.122202 |
| H | -4.957018 | -3.246132 | -4.007372 |
| H | -5.907231 | -1.856403 | -3.447173 |
| H | -5.792008 | -3.308164 | -2.450208 |
| H | -4.861315 | -1.959028 | -0.433415 |
| H | -5.173040 | -0.521773 | -1.428921 |
| H | -3.575631 | -0.779889 | -0.708330 |
| H | -4.328950 | -4.462670 | -1.250879 |
| H | -2.667716 | -6.249916 | -0.866936 |
| H | -0.319724 | -5.919676 | -1.566876 |
| H | 0.934065  | -2.801120 | -3.224880 |
| H | 2.194301  | -4.681172 | -4.187673 |
| H | 0.493138  | -4.812832 | -4.664845 |
| H | 1.138461  | -5.856308 | -3.391059 |
| H | 1.658249  | -3.039693 | -0.874059 |
| H | 2.850696  | -3.770479 | -1.963877 |
| H | 1.740043  | -4.799931 | -1.046419 |
| H | 2.396701  | -0.513259 | -3.598643 |
| H | 5.195985  | 0.475663  | -4.367253 |
| H | 3.835023  | 0.313928  | -5.484666 |
| H | 4.510404  | -1.121790 | -4.695360 |
| H | 4.233787  | -1.504623 | -2.244493 |
| H | 3.193143  | -0.460872 | -1.258710 |



|   |           |           |           |
|---|-----------|-----------|-----------|
| H | 4.783579  | 0.114665  | -1.783972 |
| H | 4.831162  | 2.259292  | -2.942610 |
| H | 4.179894  | 4.636869  | -2.758435 |
| H | 1.807913  | 5.284275  | -2.991455 |
| H | -0.891668 | 2.873687  | -3.926504 |
| H | -0.042376 | 5.814748  | -4.068882 |
| H | -1.507477 | 5.080542  | -4.722995 |
| H | 0.073347  | 4.681692  | -5.422213 |
| H | -1.061963 | 3.229129  | -1.488884 |
| H | -2.093378 | 4.368492  | -2.369878 |
| H | -0.551150 | 4.909369  | -1.674719 |
| H | 2.589806  | -0.318071 | 4.475852  |
| H | 4.175384  | -0.525513 | 5.412882  |
| H | 3.600001  | -1.315803 | 2.496840  |
| H | 6.150470  | -1.141890 | 2.557250  |
| H | 6.120032  | -1.507382 | 4.281389  |
| H | 5.162435  | -3.772494 | 3.771007  |
| H | 5.151973  | -3.392189 | 2.055030  |
| H | 7.663910  | -3.516627 | 3.807960  |
| H | 7.649659  | -3.129033 | 2.094948  |
| H | 6.720132  | -5.805469 | 3.303592  |
| H | 8.247535  | -5.533798 | 2.450553  |
| H | 6.711790  | -5.415676 | 1.577782  |

166

[TS-BC] scf done: -3114.874775 / Energies= -3113.330379 / Enthalpies= -3113.329435  
 / Free Energies= -3113.533857

|    |           |           |          |
|----|-----------|-----------|----------|
| C  | 25.434600 | 20.825176 | 2.745417 |
| C  | 24.028993 | 20.867815 | 2.914029 |
| C  | 23.383337 | 22.086410 | 3.229026 |
| C  | 24.164329 | 23.230049 | 3.423456 |
| C  | 25.546656 | 23.193999 | 3.284567 |
| C  | 26.168488 | 21.999384 | 2.938977 |
| N  | 23.266237 | 19.662438 | 2.783795 |
| C  | 22.832510 | 19.336398 | 1.565284 |
| C  | 23.070836 | 20.287213 | 0.409827 |
| C  | 21.868230 | 22.192778 | 3.324618 |
| C  | 21.303051 | 23.269976 | 2.385703 |
| C  | 26.164121 | 19.550259 | 2.341989 |
| C  | 27.030360 | 19.745912 | 1.088705 |
| C  | 22.178602 | 18.138152 | 1.231997 |
| C  | 21.889361 | 17.002005 | 2.011040 |
| C  | 21.253024 | 15.854034 | 1.247251 |
| N  | 22.127612 | 16.892073 | 3.317143 |
| C  | 21.779340 | 15.661617 | 3.955279 |
| C  | 20.430850 | 15.396501 | 4.293410 |
| C  | 20.124385 | 14.184987 | 4.920845 |
| C  | 21.111968 | 13.251618 | 5.210811 |
| C  | 22.435342 | 13.526240 | 4.882949 |
| C  | 22.798166 | 14.722671 | 4.255895 |
| C  | 19.319781 | 16.397324 | 4.005641 |
| C  | 18.048519 | 15.742375 | 3.448258 |
| C  | 24.249450 | 14.976556 | 3.863992 |
| C  | 24.515827 | 14.623569 | 2.391328 |
| C  | 18.989115 | 17.222668 | 5.254925 |
| C  | 25.261682 | 14.240383 | 4.749173 |
| C  | 21.406555 | 22.454160 | 4.762865 |
| C  | 27.012463 | 18.997925 | 3.496012 |
| Mg | 22.966617 | 18.449793 | 4.480679 |
| Mg | 22.240263 | 19.397044 | 7.883684 |
| N  | 20.761279 | 18.814530 | 9.305797 |

|   |           |           |           |
|---|-----------|-----------|-----------|
| C | 21.047770 | 19.120647 | 10.568717 |
| C | 22.104767 | 19.969091 | 10.974309 |
| C | 22.805719 | 20.962942 | 10.266889 |
| N | 22.746033 | 21.149303 | 8.943363  |
| C | 23.175060 | 22.420866 | 8.435467  |
| C | 24.485488 | 22.613406 | 7.942829  |
| C | 24.839869 | 23.866033 | 7.429334  |
| C | 23.945742 | 24.927316 | 7.419869  |
| C | 22.666089 | 24.738619 | 7.927941  |
| C | 22.254707 | 23.501538 | 8.432424  |
| C | 25.542075 | 21.520988 | 7.966955  |
| C | 26.792921 | 21.945037 | 8.753468  |
| C | 20.845108 | 23.377548 | 8.995583  |
| C | 20.705312 | 24.109747 | 10.340307 |
| C | 19.580765 | 18.036359 | 9.058504  |
| C | 19.593131 | 16.626880 | 9.210783  |
| C | 18.417393 | 15.911976 | 8.961904  |
| C | 17.242376 | 16.550154 | 8.583131  |
| C | 17.240650 | 17.930132 | 8.431266  |
| C | 18.392443 | 18.691052 | 8.656361  |
| C | 20.839684 | 15.855341 | 9.620092  |
| C | 20.585080 | 14.849114 | 10.752998 |
| C | 18.310114 | 20.201120 | 8.496015  |
| C | 17.381585 | 20.824562 | 9.549401  |
| C | 20.194763 | 18.575362 | 11.697690 |
| C | 17.870028 | 20.600971 | 7.080753  |
| C | 21.453406 | 15.131706 | 8.413580  |
| C | 23.674646 | 21.871219 | 11.115734 |
| C | 25.932011 | 21.099945 | 6.546138  |
| C | 19.779681 | 23.884849 | 8.014643  |
| C | 23.934062 | 17.856220 | 8.382288  |
| C | 24.575118 | 17.226369 | 7.331196  |
| C | 26.070487 | 17.294338 | 7.159411  |
| C | 26.780057 | 16.330327 | 8.127006  |
| C | 28.301822 | 16.353823 | 7.971378  |
| C | 29.014045 | 15.394845 | 8.923116  |
| H | 24.278381 | 17.939711 | 5.645722  |
| H | 22.004177 | 19.229271 | 6.042284  |
| H | 24.731692 | 21.670166 | 10.904684 |
| H | 23.506487 | 22.927076 | 10.889552 |
| H | 23.502609 | 21.707425 | 12.181858 |
| H | 22.282463 | 19.974572 | 12.043661 |
| H | 19.140567 | 18.823730 | 11.535704 |
| H | 20.251056 | 17.484416 | 11.756566 |
| H | 20.504498 | 18.990147 | 12.659132 |
| H | 25.111040 | 20.650551 | 8.473929  |
| H | 26.546352 | 22.291219 | 9.763097  |
| H | 27.489570 | 21.102522 | 8.842621  |
| H | 27.326727 | 22.758884 | 8.248666  |
| H | 26.304874 | 21.951770 | 5.968058  |
| H | 26.722535 | 20.341734 | 6.567607  |
| H | 25.080873 | 20.683045 | 5.998721  |
| H | 25.844162 | 24.012076 | 7.039203  |
| H | 24.245077 | 25.896423 | 7.027927  |
| H | 21.969163 | 25.573311 | 7.937299  |
| H | 20.653457 | 22.315354 | 9.175837  |
| H | 19.686092 | 24.001765 | 10.731413 |
| H | 21.394611 | 23.716468 | 11.093990 |
| H | 20.908999 | 25.181876 | 10.227315 |
| H | 19.851364 | 23.377193 | 7.048300  |

|   |           |           |           |
|---|-----------|-----------|-----------|
| H | 18.776649 | 23.710116 | 8.421610  |
| H | 19.870621 | 24.962589 | 7.834076  |
| H | 19.313993 | 20.605421 | 8.659938  |
| H | 16.353033 | 20.459670 | 9.440105  |
| H | 17.711658 | 20.588906 | 10.567129 |
| H | 17.359266 | 21.916108 | 9.447308  |
| H | 17.850662 | 21.691926 | 6.979297  |
| H | 18.553471 | 20.200445 | 6.324958  |
| H | 16.863597 | 20.230425 | 6.851886  |
| H | 16.323255 | 18.433773 | 8.135272  |
| H | 16.336806 | 15.975204 | 8.405513  |
| H | 18.422429 | 14.830744 | 9.074673  |
| H | 21.574089 | 16.578575 | 9.990169  |
| H | 19.953608 | 14.016652 | 10.421684 |
| H | 21.534953 | 14.419592 | 11.093022 |
| H | 20.093881 | 15.311458 | 11.616433 |
| H | 21.647003 | 15.815036 | 7.580503  |
| H | 22.398516 | 14.648022 | 8.689391  |
| H | 20.776142 | 14.357317 | 8.037484  |
| H | 20.165598 | 15.854336 | 1.385514  |
| H | 21.617136 | 14.882529 | 1.590334  |
| H | 21.451160 | 15.947172 | 0.176546  |
| H | 21.894901 | 18.052917 | 0.189263  |
| H | 22.592160 | 19.926327 | -0.503209 |
| H | 24.142677 | 20.401406 | 0.214842  |
| H | 22.688440 | 21.287340 | 0.634357  |
| H | 19.684371 | 17.099628 | 3.249531  |
| H | 18.262214 | 15.097163 | 2.588263  |
| H | 17.340051 | 16.515103 | 3.126877  |
| H | 17.537798 | 15.132220 | 4.202425  |
| H | 18.642285 | 16.584668 | 6.074470  |
| H | 18.197486 | 17.949356 | 5.035473  |
| H | 19.864886 | 17.775994 | 5.610241  |
| H | 19.092810 | 13.967868 | 5.185427  |
| H | 20.852973 | 12.311458 | 5.692046  |
| H | 23.199931 | 12.790616 | 5.115019  |
| H | 24.434441 | 16.052388 | 3.983636  |
| H | 25.573870 | 14.782130 | 2.147516  |
| H | 23.924183 | 15.239533 | 1.709292  |
| H | 24.279497 | 13.569835 | 2.196694  |
| H | 25.066963 | 14.396128 | 5.815642  |
| H | 26.273488 | 14.601843 | 4.533025  |
| H | 25.261801 | 13.159409 | 4.561363  |
| H | 25.407882 | 18.794962 | 2.103860  |
| H | 27.864193 | 20.433890 | 1.273810  |
| H | 26.451294 | 20.147158 | 0.249404  |
| H | 27.460823 | 18.787615 | 0.773456  |
| H | 27.516952 | 18.071582 | 3.192552  |
| H | 26.389676 | 18.778373 | 4.369237  |
| H | 27.784188 | 19.716371 | 3.799491  |
| H | 27.248761 | 21.976870 | 2.813920  |
| H | 26.135957 | 24.095670 | 3.433758  |
| H | 23.677659 | 24.167474 | 3.681320  |
| H | 21.449046 | 21.229781 | 3.012938  |
| H | 21.627867 | 24.274453 | 2.681928  |
| H | 20.206685 | 23.257912 | 2.412691  |
| H | 21.615829 | 23.115346 | 1.347000  |
| H | 21.745041 | 21.661761 | 5.437288  |
| H | 20.310808 | 22.493136 | 4.807681  |
| H | 21.796329 | 23.405086 | 5.143448  |

|   |           |           |          |
|---|-----------|-----------|----------|
| H | 23.089506 | 17.351528 | 8.850610 |
| H | 24.503281 | 18.526547 | 9.027594 |
| H | 24.101924 | 16.335961 | 6.922743 |
| H | 26.348665 | 17.050264 | 6.129241 |
| H | 26.417209 | 18.315793 | 7.353726 |
| H | 26.509820 | 16.586021 | 9.160357 |
| H | 26.414594 | 15.306452 | 7.959429 |
| H | 28.666040 | 17.377377 | 8.140201 |
| H | 28.565157 | 16.104955 | 6.933555 |
| H | 28.793121 | 15.637958 | 9.969769 |
| H | 30.101744 | 15.436475 | 8.794180 |
| H | 28.697916 | 14.358521 | 8.751198 |

166

[C] scf done: -3114.914673 / Energies= -3113.364154 / Enthalpies= -3113.363210 /  
Free Energies= -3113.567879

|    |           |           |           |
|----|-----------|-----------|-----------|
| C  | 3.217228  | 1.692554  | -3.053359 |
| C  | 1.810034  | 1.782691  | -3.185416 |
| C  | 1.155054  | 3.034136  | -3.131447 |
| C  | 1.926412  | 4.182899  | -2.930142 |
| C  | 3.308555  | 4.111982  | -2.816205 |
| C  | 3.942510  | 2.875994  | -2.882495 |
| N  | 1.045355  | 0.584139  | -3.376598 |
| C  | 0.721295  | 0.253961  | -4.629536 |
| C  | 1.099134  | 1.164959  | -5.781709 |
| C  | -0.353520 | 3.164740  | -3.290514 |
| C  | -0.749437 | 4.251365  | -4.301295 |
| C  | 3.944923  | 0.354707  | -3.130995 |
| C  | 4.265713  | -0.052214 | -4.579105 |
| C  | -0.009321 | -0.888425 | -5.000725 |
| C  | -0.554542 | -1.928636 | -4.229133 |
| C  | -1.313425 | -2.976831 | -5.020211 |
| N  | -0.478979 | -2.019298 | -2.897566 |
| C  | -1.062435 | -3.176809 | -2.282836 |
| C  | -2.445735 | -3.203870 | -1.993717 |
| C  | -2.977721 | -4.346002 | -1.386851 |
| C  | -2.181788 | -5.447067 | -1.098907 |
| C  | -0.823614 | -5.411451 | -1.395422 |
| C  | -0.234151 | -4.283871 | -1.975630 |
| C  | -3.364147 | -2.035932 | -2.324481 |
| C  | -4.648561 | -2.476392 | -3.042335 |
| C  | 1.257800  | -4.277531 | -2.289489 |
| C  | 1.557973  | -4.740419 | -3.724969 |
| C  | -3.710431 | -1.229198 | -1.066829 |
| C  | 2.082129  | -5.112998 | -1.303985 |
| C  | -1.035242 | 3.424333  | -1.941045 |
| C  | 5.231974  | 0.318094  | -2.299055 |
| Mg | 0.244681  | -0.442395 | -1.757231 |
| Mg | -0.017928 | 0.399064  | 1.835234  |
| N  | -1.519535 | -0.224018 | 3.224117  |
| C  | -1.276123 | 0.169167  | 4.472931  |
| C  | -0.424734 | 1.234861  | 4.831604  |
| C  | 0.092757  | 2.293923  | 4.056769  |
| N  | 0.072247  | 2.344799  | 2.725190  |
| C  | 0.412192  | 3.580109  | 2.090075  |
| C  | 1.754615  | 3.899824  | 1.778491  |
| C  | 2.029178  | 5.112692  | 1.137291  |
| C  | 1.019426  | 6.011672  | 0.822402  |
| C  | -0.297238 | 5.695140  | 1.139828  |
| C  | -0.628203 | 4.487715  | 1.761904  |
| C  | 2.914131  | 2.977715  | 2.121685  |

|   |           |           |           |
|---|-----------|-----------|-----------|
| C | 3.996859  | 3.680148  | 2.956171  |
| C | -2.079887 | 4.190214  | 2.113965  |
| C | -2.443360 | 4.724652  | 3.509526  |
| C | -2.552891 | -1.190928 | 3.016281  |
| C | -2.245135 | -2.572972 | 2.976442  |
| C | -3.270614 | -3.488313 | 2.719554  |
| C | -4.582035 | -3.073607 | 2.523175  |
| C | -4.880835 | -1.717888 | 2.588661  |
| C | -3.890390 | -0.761767 | 2.835403  |
| C | -0.840095 | -3.099098 | 3.227312  |
| C | -0.783585 | -4.076863 | 4.411365  |
| C | -4.292563 | 0.703808  | 2.914876  |
| C | -5.360818 | 0.950859  | 3.991233  |
| C | -1.978196 | -0.507618 | 5.633538  |
| C | -4.781536 | 1.223568  | 1.556143  |
| C | -0.264238 | -3.762196 | 1.971318  |
| C | 0.719107  | 3.420063  | 4.859862  |
| C | 3.538313  | 2.382481  | 0.853984  |
| C | -3.079276 | 4.732911  | 1.085653  |
| C | 1.825965  | -0.720529 | 1.724611  |
| C | 2.259301  | -1.287895 | 0.375931  |
| C | 3.691285  | -1.851914 | 0.285166  |
| C | 4.015199  | -2.942560 | 1.305622  |
| C | 5.434884  | -3.494485 | 1.164860  |
| C | 5.767705  | -4.570042 | 2.197236  |
| H | 2.207135  | -0.489536 | -0.404915 |
| H | -0.427255 | 0.236473  | -0.215509 |
| H | 1.807547  | 3.288507  | 4.887016  |
| H | 0.525817  | 4.399940  | 4.417564  |
| H | 0.357031  | 3.419285  | 5.890899  |
| H | -0.274242 | 1.348068  | 5.899494  |
| H | -3.020459 | -0.173089 | 5.693002  |
| H | -2.003020 | -1.593919 | 5.518264  |
| H | -1.492807 | -0.260893 | 6.580939  |
| H | 2.518112  | 2.147811  | 2.716033  |
| H | 3.581841  | 4.159484  | 3.849255  |
| H | 4.754663  | 2.955981  | 3.279276  |
| H | 4.512389  | 4.456112  | 2.377329  |
| H | 3.963652  | 3.165937  | 0.216765  |
| H | 4.340850  | 1.681356  | 1.114306  |
| H | 2.794546  | 1.843675  | 0.258964  |
| H | 3.059011  | 5.358842  | 0.889699  |
| H | 1.254947  | 6.956004  | 0.337127  |
| H | -1.084409 | 6.403813  | 0.897200  |
| H | -2.184885 | 3.099145  | 2.143345  |
| H | -3.498488 | 4.523859  | 3.733961  |
| H | -1.842814 | 4.258275  | 4.295180  |
| H | -2.288789 | 5.809865  | 3.561194  |
| H | -2.834818 | 4.408523  | 0.069592  |
| H | -4.088112 | 4.377076  | 1.322399  |
| H | -3.121231 | 5.828908  | 1.091161  |
| H | -3.402730 | 1.278832  | 3.189592  |
| H | -6.308984 | 0.460252  | 3.739592  |
| H | -5.046082 | 0.575660  | 4.971067  |
| H | -5.561993 | 2.024487  | 4.089910  |
| H | -5.084745 | 2.274551  | 1.629975  |
| H | -3.997326 | 1.148473  | 0.796235  |
| H | -5.647909 | 0.652032  | 1.201547  |
| H | -5.909358 | -1.391137 | 2.450694  |
| H | -5.367234 | -3.801668 | 2.333142  |

|   |           |           |           |
|---|-----------|-----------|-----------|
| H | -3.035148 | -4.549440 | 2.683700  |
| H | -0.202705 | -2.243685 | 3.472527  |
| H | -1.366912 | -4.984274 | 4.213758  |
| H | 0.252648  | -4.384611 | 4.597498  |
| H | -1.170369 | -3.629510 | 5.333442  |
| H | -0.279074 | -3.076123 | 1.119118  |
| H | 0.773885  | -4.071511 | 2.142472  |
| H | -0.840342 | -4.649801 | 1.686247  |
| H | -2.388590 | -2.763710 | -4.982648 |
| H | -1.175095 | -3.983316 | -4.620157 |
| H | -1.009003 | -2.966314 | -6.069604 |
| H | -0.183368 | -0.982048 | -6.066720 |
| H | 1.136519  | 0.606419  | -6.720340 |
| H | 2.057490  | 1.663328  | -5.625078 |
| H | 0.342714  | 1.951416  | -5.893891 |
| H | -2.825242 | -1.367208 | -3.004946 |
| H | -4.437085 | -3.098766 | -3.919348 |
| H | -5.212188 | -1.597388 | -3.377036 |
| H | -5.307718 | -3.050414 | -2.380910 |
| H | -4.238663 | -1.846526 | -0.332285 |
| H | -4.354096 | -0.378442 | -1.322361 |
| H | -2.811519 | -0.839646 | -0.577126 |
| H | -4.036415 | -4.374991 | -1.143512 |
| H | -2.617114 | -6.332097 | -0.641298 |
| H | -0.208857 | -6.275892 | -1.162715 |
| H | 1.601766  | -3.237563 | -2.211152 |
| H | 2.641677  | -4.777951 | -3.891185 |
| H | 1.133142  | -4.066400 | -4.473294 |
| H | 1.155827  | -5.745959 | -3.900416 |
| H | 1.831707  | -4.878624 | -0.264842 |
| H | 3.150107  | -4.917077 | -1.450990 |
| H | 1.930232  | -6.188741 | -1.454930 |
| H | 3.265924  | -0.408101 | -2.727236 |
| H | 4.877494  | 0.714493  | -5.070595 |
| H | 3.363083  | -0.203880 | -5.176813 |
| H | 4.831313  | -0.992192 | -4.591555 |
| H | 5.608435  | -0.709005 | -2.240721 |
| H | 5.068610  | 0.678203  | -1.278731 |
| H | 6.025661  | 0.925354  | -2.751126 |
| H | 5.023674  | 2.831156  | -2.791481 |
| H | 3.892746  | 5.017848  | -2.674280 |
| H | 1.435241  | 5.150213  | -2.869280 |
| H | -0.735659 | 2.211609  | -3.672357 |
| H | -0.515053 | 5.255698  | -3.930096 |
| H | -1.829933 | 4.218291  | -4.485370 |
| H | -0.236267 | 4.125161  | -5.261267 |
| H | -0.827499 | 2.625513  | -1.221160 |
| H | -2.122902 | 3.490485  | -2.071674 |
| H | -0.685527 | 4.362428  | -1.496589 |
| H | 1.762021  | -1.552036 | 2.443332  |
| H | 2.638725  | -0.079795 | 2.105392  |
| H | 1.555026  | -2.081966 | 0.062442  |
| H | 3.877573  | -2.238562 | -0.729858 |
| H | 4.395570  | -1.020483 | 0.430477  |
| H | 3.880948  | -2.538196 | 2.317248  |
| H | 3.295228  | -3.768202 | 1.209029  |
| H | 6.154086  | -2.667238 | 1.253581  |
| H | 5.569843  | -3.904616 | 0.153089  |
| H | 5.676776  | -4.179333 | 3.218320  |
| H | 6.790630  | -4.944782 | 2.074074  |

|                                                                                  |           |           |           |
|----------------------------------------------------------------------------------|-----------|-----------|-----------|
| H                                                                                | 5.087044  | -5.426213 | 2.110611  |
| 166                                                                              |           |           |           |
| [D] scf done: -3114.932759 / Energies= -3113.382997 / Enthalpies= -3113.382053 / |           |           |           |
| Free Energies= -3113.607625                                                      |           |           |           |
| C                                                                                | 13.404582 | 15.789081 | 6.625771  |
| C                                                                                | 14.101180 | 15.128299 | 7.664152  |
| C                                                                                | 15.118009 | 15.798170 | 8.385224  |
| C                                                                                | 15.422934 | 17.118730 | 8.043179  |
| C                                                                                | 14.747956 | 17.776372 | 7.021072  |
| C                                                                                | 13.747240 | 17.110762 | 6.323519  |
| N                                                                                | 13.843977 | 13.744214 | 7.921105  |
| C                                                                                | 12.975101 | 13.392286 | 8.868221  |
| C                                                                                | 12.676294 | 12.062284 | 9.221954  |
| C                                                                                | 13.184481 | 10.849316 | 8.717207  |
| C                                                                                | 12.663867 | 9.583317  | 9.361665  |
| C                                                                                | 15.904077 | 15.110665 | 9.493330  |
| C                                                                                | 15.923963 | 15.923057 | 10.795784 |
| C                                                                                | 12.310134 | 15.100224 | 5.822516  |
| C                                                                                | 10.979539 | 15.864540 | 5.877565  |
| Mg                                                                               | 14.867206 | 12.390391 | 6.754822  |
| N                                                                                | 14.076209 | 10.760173 | 7.732071  |
| C                                                                                | 14.528988 | 9.476905  | 7.289657  |
| C                                                                                | 15.706601 | 8.923020  | 7.843096  |
| C                                                                                | 16.186891 | 7.715980  | 7.326304  |
| C                                                                                | 15.532449 | 7.061579  | 6.289494  |
| C                                                                                | 14.375664 | 7.615014  | 5.753124  |
| C                                                                                | 13.853463 | 8.819020  | 6.235109  |
| C                                                                                | 16.476289 | 9.618595  | 8.956717  |
| C                                                                                | 16.708197 | 8.707190  | 10.169970 |
| C                                                                                | 12.600803 | 9.399877  | 5.594394  |
| C                                                                                | 11.434422 | 8.402125  | 5.567518  |
| C                                                                                | 17.810615 | 10.176008 | 8.436844  |
| C                                                                                | 12.898867 | 9.919504  | 4.179177  |
| C                                                                                | 12.245620 | 14.470191 | 9.640021  |
| C                                                                                | 17.336105 | 14.794221 | 9.035980  |
| C                                                                                | 12.745252 | 14.877521 | 4.365855  |
| C                                                                                | 16.158959 | 12.470960 | 5.073078  |
| C                                                                                | 17.201930 | 13.592065 | 4.955065  |
| C                                                                                | 18.023654 | 13.555056 | 3.659958  |
| C                                                                                | 19.067829 | 14.667263 | 3.548529  |
| C                                                                                | 19.876028 | 14.625267 | 2.250387  |
| C                                                                                | 20.918089 | 15.737399 | 2.148096  |
| C                                                                                | 22.811659 | 18.373790 | 6.495912  |
| C                                                                                | 23.505592 | 17.517148 | 7.563854  |
| C                                                                                | 22.504539 | 17.093938 | 8.650962  |
| C                                                                                | 24.711647 | 18.207486 | 8.184150  |
| C                                                                                | 25.968238 | 17.566089 | 8.284518  |
| C                                                                                | 27.056222 | 18.211846 | 8.915957  |
| C                                                                                | 26.866141 | 19.499714 | 9.426349  |
| C                                                                                | 25.638710 | 20.143474 | 9.325049  |
| C                                                                                | 24.573764 | 19.495057 | 8.710499  |
| N                                                                                | 26.113713 | 16.215796 | 7.831542  |
| Mg                                                                               | 25.704791 | 14.743807 | 9.194070  |
| N                                                                                | 26.118836 | 13.219301 | 7.892370  |
| C                                                                                | 26.494219 | 13.414556 | 6.628623  |
| C                                                                                | 26.659206 | 14.681194 | 6.034756  |
| C                                                                                | 26.485747 | 15.970308 | 6.575557  |
| C                                                                                | 26.742676 | 17.132136 | 5.641686  |
| C                                                                                | 28.406781 | 17.531204 | 9.085908  |
| C                                                                                | 29.565087 | 18.372319 | 8.531578  |

|   |           |           |           |
|---|-----------|-----------|-----------|
| C | 25.970638 | 11.888797 | 8.399639  |
| C | 24.716169 | 11.241533 | 8.310955  |
| C | 24.572661 | 9.978117  | 8.891722  |
| C | 25.630199 | 9.358945  | 9.547728  |
| C | 26.855610 | 10.008367 | 9.636391  |
| C | 27.051036 | 11.273087 | 9.072775  |
| C | 23.517475 | 11.901181 | 7.644417  |
| C | 22.499145 | 12.364794 | 8.698522  |
| C | 28.398120 | 11.963217 | 9.230597  |
| C | 29.565976 | 11.097295 | 8.737970  |
| C | 26.765398 | 12.216425 | 5.746129  |
| C | 28.621421 | 12.396848 | 10.688212 |
| C | 22.843081 | 10.997072 | 6.603527  |
| C | 28.655051 | 17.170304 | 10.559202 |
| H | 25.206587 | 14.777964 | 10.842696 |
| H | 12.950057 | 15.084041 | 10.212349 |
| H | 11.722400 | 15.150805 | 8.959825  |
| H | 11.519407 | 14.040672 | 10.333416 |
| H | 11.948107 | 11.955356 | 10.017662 |
| H | 11.927181 | 9.804594  | 10.136934 |
| H | 12.202075 | 8.926557  | 8.616730  |
| H | 13.483729 | 9.012954  | 9.812512  |
| H | 15.411523 | 14.156504 | 9.710339  |
| H | 14.911530 | 16.168033 | 11.136182 |
| H | 16.419855 | 15.353674 | 11.590855 |
| H | 16.471089 | 16.865834 | 10.679433 |
| H | 17.889045 | 15.713860 | 8.809263  |
| H | 17.884265 | 14.255540 | 9.818692  |
| H | 17.342050 | 14.178953 | 8.129030  |
| H | 16.207337 | 17.641054 | 8.585846  |
| H | 15.001249 | 18.803253 | 6.769536  |
| H | 13.220504 | 17.626741 | 5.523944  |
| H | 12.137897 | 14.115282 | 6.271552  |
| H | 11.057895 | 16.848009 | 5.399147  |
| H | 10.196273 | 15.304610 | 5.352522  |
| H | 10.647053 | 16.023886 | 6.909394  |
| H | 13.671477 | 14.294777 | 4.307340  |
| H | 11.968015 | 14.341155 | 3.807525  |
| H | 12.924993 | 15.832063 | 3.856575  |
| H | 12.282694 | 10.255904 | 6.199941  |
| H | 11.206966 | 8.017394  | 6.568078  |
| H | 10.530544 | 8.885471  | 5.177569  |
| H | 11.649193 | 7.541687  | 4.922737  |
| H | 13.212388 | 9.102586  | 3.517960  |
| H | 12.006836 | 10.383726 | 3.740494  |
| H | 13.704601 | 10.662414 | 4.184160  |
| H | 13.868449 | 7.102955  | 4.938672  |
| H | 15.923388 | 6.125050  | 5.899579  |
| H | 17.094137 | 7.282659  | 7.741148  |
| H | 15.873679 | 10.467937 | 9.297465  |
| H | 17.357871 | 7.858933  | 9.923411  |
| H | 17.192401 | 9.266671  | 10.979384 |
| H | 15.766344 | 8.301191  | 10.555753 |
| H | 17.660857 | 10.858476 | 7.591988  |
| H | 18.338701 | 10.721384 | 9.228601  |
| H | 18.466164 | 9.367847  | 8.090050  |
| H | 25.863972 | 11.602947 | 5.637882  |
| H | 27.528946 | 11.569474 | 6.191360  |
| H | 27.099640 | 12.520834 | 4.751995  |
| H | 26.968555 | 14.660637 | 4.996116  |



|   |           |           |           |
|---|-----------|-----------|-----------|
| H | 25.836307 | 17.735091 | 5.516668  |
| H | 27.069636 | 16.788350 | 4.658050  |
| H | 27.506169 | 17.801991 | 6.051677  |
| H | 23.876769 | 12.792258 | 7.117706  |
| H | 23.556815 | 10.645104 | 5.850067  |
| H | 22.045799 | 11.542845 | 6.085184  |
| H | 22.386486 | 10.113909 | 7.065653  |
| H | 22.090738 | 11.508936 | 9.249566  |
| H | 21.661898 | 12.892323 | 8.225222  |
| H | 22.955557 | 13.036535 | 9.435469  |
| H | 23.611909 | 9.472029  | 8.834047  |
| H | 25.497846 | 8.376192  | 9.993469  |
| H | 27.678149 | 9.525913  | 10.159324 |
| H | 28.382457 | 12.869338 | 8.614361  |
| H | 29.684857 | 10.192534 | 9.345542  |
| H | 30.506701 | 11.657823 | 8.797183  |
| H | 29.424392 | 10.782603 | 7.697873  |
| H | 27.808559 | 13.038644 | 11.048272 |
| H | 29.564600 | 12.948041 | 10.788819 |
| H | 28.668301 | 11.526537 | 11.354073 |
| H | 28.382609 | 16.595794 | 8.515560  |
| H | 29.406338 | 18.634091 | 7.479394  |
| H | 30.507617 | 17.816279 | 8.603325  |
| H | 29.692426 | 19.306899 | 9.090432  |
| H | 28.711556 | 18.072215 | 11.180897 |
| H | 29.600886 | 16.625817 | 10.670828 |
| H | 27.849757 | 16.545807 | 10.963788 |
| H | 27.694800 | 20.005348 | 9.916653  |
| H | 25.510535 | 21.144794 | 9.728662  |
| H | 23.611771 | 19.997538 | 8.642614  |
| H | 23.860922 | 16.606340 | 7.069041  |
| H | 22.358678 | 19.274624 | 6.926613  |
| H | 22.008811 | 17.803072 | 6.014477  |
| H | 23.512078 | 18.695090 | 5.716720  |
| H | 22.973862 | 16.454333 | 9.408069  |
| H | 21.662707 | 16.544681 | 8.211562  |
| H | 22.100561 | 17.969989 | 9.172852  |
| H | 16.673629 | 11.496674 | 5.007476  |
| H | 15.520751 | 12.498530 | 4.171191  |
| H | 16.715284 | 14.576919 | 5.029302  |
| H | 18.521169 | 12.576096 | 3.581465  |
| H | 17.336254 | 13.613099 | 2.801901  |
| H | 18.568922 | 15.645103 | 3.631925  |
| H | 19.757419 | 14.606845 | 4.405031  |
| H | 19.187893 | 14.688651 | 1.395123  |
| H | 20.373168 | 13.648120 | 2.165843  |
| H | 20.447181 | 16.727309 | 2.195755  |
| H | 21.477897 | 15.680714 | 1.207051  |
| H | 21.642908 | 15.678047 | 2.970035  |
| H | 17.901598 | 13.548486 | 5.805260  |

184

[E] scf done: -3350.686244 / Energies= -3348.958590 / Enthalpies= -3348.957646 /  
Free Energies= -3349.203346

|    |           |           |           |
|----|-----------|-----------|-----------|
| Mg | -4.921025 | -0.234437 | -1.703407 |
| N  | -6.560778 | -1.513218 | -1.796608 |
| C  | -6.556983 | -2.569302 | -2.759442 |
| C  | -6.147095 | -3.865299 | -2.351471 |
| C  | -6.076188 | -4.876967 | -3.310512 |
| C  | -6.386060 | -4.632889 | -4.645645 |
| C  | -6.777805 | -3.358253 | -5.032791 |

|    |           |           |           |
|----|-----------|-----------|-----------|
| C  | -6.875784 | -2.308395 | -4.112090 |
| N  | -5.449644 | 0.519205  | 0.169608  |
| C  | -6.736229 | 0.545792  | 0.504257  |
| C  | -7.745889 | -0.208273 | -0.132026 |
| C  | -7.671796 | -1.187384 | -1.143088 |
| C  | -8.991221 | -1.846873 | -1.490574 |
| C  | -5.834434 | -4.171260 | -0.892312 |
| C  | -7.058858 | -4.751994 | -0.166609 |
| C  | -7.339696 | -0.942231 | -4.601281 |
| C  | -8.741872 | -1.010717 | -5.224749 |
| C  | -4.476110 | 1.197803  | 0.967498  |
| C  | -3.887481 | 0.525478  | 2.069819  |
| C  | -2.895809 | 1.182733  | 2.803373  |
| C  | -2.469208 | 2.460775  | 2.466125  |
| C  | -3.042798 | 3.106917  | 1.377931  |
| C  | -4.047342 | 2.500188  | 0.613915  |
| C  | -4.329279 | -0.870506 | 2.492963  |
| C  | -5.250658 | -0.819707 | 3.722841  |
| C  | -4.658998 | 3.278613  | -0.544186 |
| C  | -5.413731 | 4.519652  | -0.039005 |
| C  | -3.150668 | -1.813414 | 2.776102  |
| C  | -3.612021 | 3.674678  | -1.593193 |
| C  | -7.230783 | 1.468254  | 1.603952  |
| C  | -4.634745 | -5.113444 | -0.713807 |
| C  | -6.343854 | -0.319295 | -5.588438 |
| C  | -2.700626 | -1.553606 | -0.903376 |
| C  | -2.175008 | -1.442933 | -2.133764 |
| C  | -1.945397 | -2.568422 | -3.094701 |
| C  | -2.519637 | -2.318348 | -4.496995 |
| C  | -2.156218 | -3.427528 | -5.483431 |
| C  | -2.730025 | -3.192603 | -6.879799 |
| C  | 1.535014  | 4.399387  | -0.618769 |
| C  | 2.588960  | 3.681190  | 0.236703  |
| C  | 2.045821  | 3.411279  | 1.650454  |
| C  | 3.907033  | 4.439884  | 0.299818  |
| C  | 5.137504  | 3.817105  | -0.013756 |
| C  | 6.351965  | 4.540215  | 0.085697  |
| C  | 6.306052  | 5.874459  | 0.495518  |
| C  | 5.099825  | 6.497087  | 0.802713  |
| C  | 3.915282  | 5.776188  | 0.705196  |
| N  | 5.167371  | 2.423631  | -0.333452 |
| Mg | 5.329798  | 1.133025  | 1.263090  |
| C  | 5.631657  | 1.555205  | 3.322103  |
| C  | 4.820367  | 0.801442  | 4.384555  |
| C  | 5.166432  | 1.179631  | 5.831428  |
| C  | 4.352206  | 0.428202  | 6.886603  |
| C  | 4.707968  | 0.808153  | 8.323924  |
| C  | 3.891009  | 0.050886  | 9.369657  |
| C  | 7.696788  | 3.890163  | -0.205486 |
| C  | 8.525802  | 4.683937  | -1.227492 |
| C  | 5.091678  | 2.028509  | -1.601471 |
| C  | 4.974297  | 3.070132  | -2.692580 |
| C  | 5.111328  | 0.683612  | -2.016115 |
| C  | 5.180776  | -0.500917 | -1.259660 |
| C  | 5.170022  | -1.797137 | -2.038986 |
| N  | 5.248720  | -0.545602 | 0.070866  |
| C  | 5.288286  | -1.807019 | 0.746523  |
| C  | 4.078594  | -2.423775 | 1.147433  |
| C  | 4.144838  | -3.597061 | 1.901992  |
| C  | 5.363207  | -4.164005 | 2.255808  |

|   |           |           |           |
|---|-----------|-----------|-----------|
| C | 6.545083  | -3.554526 | 1.849118  |
| C | 6.533889  | -2.377377 | 1.093353  |
| C | 2.720324  | -1.829989 | 0.802989  |
| C | 2.038368  | -1.250142 | 2.051015  |
| C | 7.855501  | -1.741768 | 0.680811  |
| C | 8.752453  | -2.712410 | -0.101568 |
| C | 8.604324  | -1.181102 | 1.898319  |
| C | 1.796053  | -2.841687 | 0.107869  |
| C | 8.495316  | 3.682413  | 1.089607  |
| H | -2.455434 | -4.001428 | -7.567275 |
| H | -6.436140 | 1.771035  | 2.283366  |
| H | -7.642908 | 2.377061  | 1.147263  |
| H | -8.034601 | 0.998879  | 2.175254  |
| H | -8.744763 | -0.039710 | 0.260354  |
| H | -9.604597 | -1.989799 | -0.595856 |
| H | -9.556015 | -1.196802 | -2.172617 |
| H | -8.855369 | -2.806526 | -1.990901 |
| H | -4.908767 | -1.294877 | 1.665103  |
| H | -6.146060 | -0.218233 | 3.540662  |
| H | -5.575986 | -1.828102 | 4.004205  |
| H | -4.724802 | -0.385284 | 4.584794  |
| H | -2.600098 | -1.518935 | 3.677419  |
| H | -3.517811 | -2.832105 | 2.942081  |
| H | -2.438344 | -1.838029 | 1.945067  |
| H | -2.447336 | 0.680062  | 3.659701  |
| H | -1.699368 | 2.955670  | 3.051772  |
| H | -2.711965 | 4.108216  | 1.117967  |
| H | -5.383959 | 2.627875  | -1.042178 |
| H | -4.732009 | 5.239455  | 0.430540  |
| H | -5.909525 | 5.029712  | -0.875365 |
| H | -6.175535 | 4.258055  | 0.701258  |
| H | -3.128850 | 2.789830  | -2.015988 |
| H | -4.087597 | 4.220043  | -2.416338 |
| H | -2.838103 | 4.328298  | -1.165217 |
| H | -7.394006 | -0.276562 | -3.732096 |
| H | -9.469860 | -1.467873 | -4.547875 |
| H | -9.093604 | -0.003020 | -5.477801 |
| H | -8.738389 | -1.599354 | -6.151213 |
| H | -6.220231 | -0.947183 | -6.480810 |
| H | -6.702841 | 0.663191  | -5.919193 |
| H | -5.363957 | -0.174062 | -5.122612 |
| H | -7.024978 | -3.170570 | -6.076319 |
| H | -6.323053 | -5.434046 | -5.377948 |
| H | -5.776177 | -5.877415 | -3.009474 |
| H | -5.589443 | -3.216997 | -0.409149 |
| H | -7.375905 | -5.691536 | -0.631417 |
| H | -6.823032 | -4.957425 | 0.885520  |
| H | -7.909004 | -4.063805 | -0.189994 |
| H | -3.760317 | -4.773260 | -1.275334 |
| H | -4.358365 | -5.168695 | 0.345921  |
| H | -4.862844 | -6.135429 | -1.039608 |
| H | 5.472723  | 2.639447  | 3.455892  |
| H | 6.704257  | 1.408505  | 3.538233  |
| H | 3.740839  | 0.981635  | 4.236681  |
| H | 4.954341  | -0.285300 | 4.270826  |
| H | 5.024237  | 2.263398  | 5.962104  |
| H | 6.238372  | 0.995722  | 5.996551  |
| H | 4.497127  | -0.655213 | 6.752199  |
| H | 3.280313  | 0.615041  | 6.717608  |
| H | 5.778350  | 0.622212  | 8.493360  |

|   |           |           |           |
|---|-----------|-----------|-----------|
| H | 4.564095  | 1.889838  | 8.459396  |
| H | 4.044085  | -1.032414 | 9.284160  |
| H | 4.169795  | 0.342762  | 10.389840 |
| H | 2.817923  | 0.242053  | 9.250103  |
| H | 4.305703  | -2.412266 | -1.763125 |
| H | 6.059764  | -2.395455 | -1.811670 |
| H | 5.137649  | -1.615767 | -3.114605 |
| H | 5.055954  | 0.535057  | -3.089142 |
| H | 4.080127  | 3.686390  | -2.544863 |
| H | 4.917103  | 2.605966  | -3.681998 |
| H | 5.829010  | 3.751690  | -2.674448 |
| H | 2.882966  | -1.001744 | 0.105622  |
| H | 2.264125  | -3.264984 | -0.788200 |
| H | 0.860093  | -2.356926 | -0.192932 |
| H | 1.537201  | -3.675855 | 0.768954  |
| H | 1.826576  | -2.036419 | 2.788272  |
| H | 1.084927  | -0.775523 | 1.788829  |
| H | 2.668289  | -0.504196 | 2.546328  |
| H | 3.221348  | -4.078124 | 2.222469  |
| H | 5.394108  | -5.076514 | 2.844672  |
| H | 7.496982  | -3.999702 | 2.125215  |
| H | 7.625145  | -0.901834 | 0.017991  |
| H | 9.069426  | -3.559511 | 0.517378  |
| H | 9.658996  | -2.198488 | -0.445892 |
| H | 8.240154  | -3.118081 | -0.979752 |
| H | 7.992255  | -0.457184 | 2.451421  |
| H | 9.528960  | -0.678793 | 1.588135  |
| H | 8.879308  | -1.980110 | 2.598210  |
| H | 7.503556  | 2.904052  | -0.638479 |
| H | 7.971971  | 4.844949  | -2.158361 |
| H | 9.446400  | 4.141309  | -1.471306 |
| H | 8.816485  | 5.665525  | -0.839660 |
| H | 8.734047  | 4.640065  | 1.565268  |
| H | 9.443094  | 3.165609  | 0.884224  |
| H | 7.933971  | 3.086582  | 1.818960  |
| H | 7.231413  | 6.437514  | 0.579124  |
| H | 5.084777  | 7.535121  | 1.122995  |
| H | 2.972648  | 6.263734  | 0.950647  |
| H | 2.781765  | 2.712440  | -0.232165 |
| H | 1.243460  | 5.361159  | -0.181393 |
| H | 0.627160  | 3.787417  | -0.695800 |
| H | 1.900848  | 4.591116  | -1.631843 |
| H | 2.775054  | 2.868266  | 2.264729  |
| H | 1.124443  | 2.822239  | 1.605961  |
| H | 1.822328  | 4.351173  | 2.169550  |
| H | -1.856888 | -0.456515 | -2.475844 |
| H | -0.856095 | -2.706132 | -3.185878 |
| H | -3.610998 | -2.227403 | -4.433808 |
| H | -2.151766 | -1.353283 | -4.874870 |
| H | -1.062022 | -3.520796 | -5.542798 |
| H | -2.525388 | -4.388204 | -5.096192 |
| H | -2.359407 | -2.251889 | -7.306171 |
| H | -3.824048 | -3.134389 | -6.848580 |
| H | -4.294059 | 0.713510  | -3.024302 |
| H | -2.345458 | -3.501521 | -2.683602 |
| H | -2.736160 | -0.698754 | -0.224481 |
| H | -3.022460 | -2.510860 | -0.502986 |

184

[TS-EF] scf done: -3350.667974 / Energies= -3348.941821 / Enthalpies= -3348.940877  
 / Free Energies= -3349.183124

|    |           |           |           |
|----|-----------|-----------|-----------|
| Mg | 15.850313 | 12.959545 | 6.896545  |
| N  | 14.303282 | 11.608524 | 7.112794  |
| C  | 14.448423 | 10.327837 | 6.497269  |
| C  | 15.150196 | 9.309513  | 7.191010  |
| C  | 15.342676 | 8.078292  | 6.557231  |
| C  | 14.876350 | 7.847286  | 5.267652  |
| C  | 14.205108 | 8.857936  | 4.591489  |
| C  | 13.974947 | 10.105097 | 5.182303  |
| N  | 15.043263 | 14.367181 | 8.170423  |
| C  | 13.785027 | 14.278093 | 8.594882  |
| C  | 12.930829 | 13.184172 | 8.351338  |
| C  | 13.162936 | 11.951954 | 7.706731  |
| C  | 11.982649 | 11.001248 | 7.688395  |
| C  | 15.658253 | 9.525021  | 8.610618  |
| C  | 14.618078 | 9.083716  | 9.652910  |
| C  | 13.246725 | 11.176770 | 4.382108  |
| C  | 11.897253 | 10.683444 | 3.838555  |
| C  | 15.863016 | 15.475876 | 8.544426  |
| C  | 16.537066 | 15.474244 | 9.791143  |
| C  | 17.413282 | 16.525115 | 10.080351 |
| C  | 17.623884 | 17.563860 | 9.181006  |
| C  | 16.947286 | 17.563093 | 7.967238  |
| C  | 16.064867 | 16.533730 | 7.623583  |
| C  | 16.341510 | 14.374086 | 10.826858 |
| C  | 15.880809 | 14.935234 | 12.181545 |
| C  | 15.315312 | 16.612173 | 6.299898  |
| C  | 14.258938 | 17.728795 | 6.328702  |
| C  | 17.613894 | 13.534809 | 11.015107 |
| C  | 16.252486 | 16.796828 | 5.099386  |
| C  | 13.192388 | 15.391207 | 9.433634  |
| C  | 16.999966 | 8.836086  | 8.888113  |
| C  | 14.123748 | 11.705069 | 3.237689  |
| C  | 18.037789 | 12.360525 | 7.108305  |
| C  | 18.049300 | 12.887529 | 5.812438  |
| C  | 18.298883 | 12.029495 | 4.590956  |
| C  | 18.210948 | 12.751824 | 3.248508  |
| C  | 18.530535 | 11.845333 | 2.059204  |
| C  | 18.453739 | 12.571536 | 0.717891  |
| C  | 22.111148 | 18.006925 | 7.998312  |
| C  | 23.087168 | 17.118230 | 8.781771  |
| C  | 22.460124 | 16.666170 | 10.109987 |
| C  | 24.431338 | 17.791076 | 9.021383  |
| C  | 25.652427 | 17.163868 | 8.681059  |
| C  | 26.886495 | 17.798411 | 8.956022  |
| C  | 26.871528 | 19.057799 | 9.562919  |
| C  | 25.677487 | 19.686162 | 9.896446  |
| C  | 24.471224 | 19.050387 | 9.627372  |
| N  | 25.641782 | 15.838181 | 8.142270  |
| Mg | 25.676844 | 14.301771 | 9.512430  |
| C  | 25.846139 | 14.369907 | 11.626998 |
| C  | 24.949017 | 13.473808 | 12.494012 |
| C  | 25.195914 | 13.598979 | 14.003058 |
| C  | 24.297635 | 12.703404 | 14.857974 |
| C  | 24.537679 | 12.842759 | 16.362218 |
| C  | 23.638190 | 11.940559 | 17.205027 |
| C  | 28.220094 | 17.134064 | 8.644372  |
| C  | 29.142940 | 18.025938 | 7.802299  |
| C  | 25.616118 | 15.659221 | 6.822749  |
| C  | 25.590907 | 16.868124 | 5.913375  |
| C  | 25.612528 | 14.399733 | 6.192101  |

|   |           |           |           |
|---|-----------|-----------|-----------|
| C | 25.622785 | 13.105794 | 6.747817  |
| C | 25.608887 | 11.954589 | 5.766220  |
| N | 25.637375 | 12.846220 | 8.054924  |
| C | 25.634495 | 11.490336 | 8.514411  |
| C | 24.405356 | 10.828265 | 8.745385  |
| C | 24.430751 | 9.541721  | 9.291945  |
| C | 25.629259 | 8.910360  | 9.603599  |
| C | 26.830570 | 9.568259  | 9.368274  |
| C | 26.860579 | 10.856268 | 8.825009  |
| C | 23.065107 | 11.485633 | 8.445574  |
| C | 22.330740 | 11.854491 | 9.743576  |
| C | 28.202464 | 11.539912 | 8.601972  |
| C | 29.131627 | 10.718325 | 7.696794  |
| C | 28.892822 | 11.857481 | 9.937310  |
| C | 22.167652 | 10.615934 | 7.553720  |
| C | 28.925937 | 16.694325 | 9.936831  |
| H | 18.682007 | 11.898416 | -0.116487 |
| H | 13.579150 | 16.370365 | 9.140641  |
| H | 12.102273 | 15.399228 | 9.354501  |
| H | 13.447058 | 15.247003 | 10.490234 |
| H | 11.933038 | 13.293518 | 8.762890  |
| H | 11.322731 | 11.182698 | 8.540665  |
| H | 11.394393 | 11.154565 | 6.775503  |
| H | 12.297343 | 9.955132  | 7.696521  |
| H | 15.558792 | 13.701809 | 10.460047 |
| H | 14.994878 | 15.571388 | 12.081097 |
| H | 15.636424 | 14.117363 | 12.870019 |
| H | 16.665030 | 15.537971 | 12.654769 |
| H | 18.448787 | 14.151669 | 11.369144 |
| H | 17.446623 | 12.743419 | 11.756265 |
| H | 17.921627 | 13.059325 | 10.079074 |
| H | 17.938478 | 16.530794 | 11.032846 |
| H | 18.306081 | 18.373329 | 9.428419  |
| H | 17.101145 | 18.384332 | 7.271117  |
| H | 14.787224 | 15.662658 | 6.157653  |
| H | 14.726482 | 18.711453 | 6.467156  |
| H | 13.700511 | 17.753215 | 5.384877  |
| H | 13.538786 | 17.586425 | 7.141512  |
| H | 16.981900 | 15.983457 | 5.037993  |
| H | 15.674629 | 16.796408 | 4.167458  |
| H | 16.798051 | 17.746958 | 5.148480  |
| H | 13.047698 | 12.020855 | 5.050964  |
| H | 11.265030 | 10.267519 | 4.630758  |
| H | 11.353267 | 11.510654 | 3.367074  |
| H | 12.027072 | 9.903747  | 3.078540  |
| H | 14.388990 | 10.901384 | 2.539613  |
| H | 13.591826 | 12.480448 | 2.672038  |
| H | 15.048630 | 12.145442 | 3.625166  |
| H | 13.849569 | 8.676799  | 3.579811  |
| H | 15.039102 | 6.883430  | 4.791552  |
| H | 15.869768 | 7.284803  | 7.079974  |
| H | 15.807309 | 10.603901 | 8.741627  |
| H | 14.386118 | 8.017138  | 9.542467  |
| H | 14.999900 | 9.243213  | 10.668977 |
| H | 13.683755 | 9.644455  | 9.555534  |
| H | 17.743300 | 9.063752  | 8.116421  |
| H | 17.398682 | 9.169903  | 9.853090  |
| H | 16.898164 | 7.745586  | 8.943308  |
| H | 25.698140 | 15.420722 | 11.930925 |
| H | 26.898404 | 14.156669 | 11.887553 |

|   |           |           |           |
|---|-----------|-----------|-----------|
| H | 23.887792 | 13.703001 | 12.303700 |
| H | 25.075962 | 12.417968 | 12.208312 |
| H | 25.055638 | 14.649596 | 14.300650 |
| H | 26.251082 | 13.364166 | 14.211676 |
| H | 24.446459 | 11.652802 | 14.564366 |
| H | 23.242804 | 12.931076 | 14.638971 |
| H | 25.591345 | 12.618336 | 16.582563 |
| H | 24.384262 | 13.891058 | 16.656722 |
| H | 23.797768 | 10.882741 | 16.961120 |
| H | 23.830164 | 12.066952 | 18.277124 |
| H | 22.578095 | 12.162118 | 17.028560 |
| H | 24.687085 | 11.371051 | 5.868436  |
| H | 26.436598 | 11.264623 | 5.960638  |
| H | 25.680907 | 12.308948 | 4.735616  |
| H | 25.597538 | 14.431182 | 5.108659  |
| H | 24.713852 | 17.491167 | 6.120393  |
| H | 25.570799 | 16.576050 | 4.861241  |
| H | 26.468198 | 17.501452 | 6.084278  |
| H | 23.262883 | 12.416755 | 7.903075  |
| H | 22.674119 | 10.329637 | 6.624939  |
| H | 21.252917 | 11.160167 | 7.290197  |
| H | 21.864306 | 9.692941  | 8.062118  |
| H | 22.094936 | 10.957579 | 10.329154 |
| H | 21.388084 | 12.369367 | 9.521897  |
| H | 22.937337 | 12.507836 | 10.380627 |
| H | 23.492032 | 9.025685  | 9.479995  |
| H | 25.626773 | 7.909721  | 10.028701 |
| H | 27.767135 | 9.072884  | 9.614343  |
| H | 28.010176 | 12.490996 | 8.092834  |
| H | 29.410690 | 9.765350  | 8.161752  |
| H | 30.057748 | 11.271513 | 7.499035  |
| H | 28.661359 | 10.491943 | 6.733352  |
| H | 28.257711 | 12.476333 | 10.581106 |
| H | 29.834808 | 12.393755 | 9.768339  |
| H | 29.124849 | 10.939008 | 10.489878 |
| H | 28.014101 | 16.231827 | 8.057635  |
| H | 28.654285 | 18.356057 | 6.878734  |
| H | 30.052310 | 17.478473 | 7.526607  |
| H | 29.454735 | 18.922259 | 8.351477  |
| H | 29.170804 | 17.559675 | 10.564691 |
| H | 29.861552 | 16.168658 | 9.708896  |
| H | 28.294118 | 16.026719 | 10.533763 |
| H | 27.814192 | 19.553617 | 9.782811  |
| H | 25.687203 | 20.665426 | 10.368608 |
| H | 23.538847 | 19.540448 | 9.897892  |
| H | 23.265719 | 16.220920 | 8.178762  |
| H | 21.831683 | 18.902859 | 8.565512  |
| H | 21.187784 | 17.457310 | 7.779974  |
| H | 22.541802 | 18.338853 | 7.046785  |
| H | 23.128023 | 15.994402 | 10.662160 |
| H | 21.513043 | 16.141745 | 9.934091  |
| H | 22.254792 | 17.526012 | 10.759353 |
| H | 18.372391 | 13.923759 | 5.709630  |
| H | 19.318764 | 11.630957 | 4.715282  |
| H | 17.206728 | 13.178479 | 3.132448  |
| H | 18.908717 | 13.603210 | 3.251219  |
| H | 19.534480 | 11.414503 | 2.185399  |
| H | 17.833556 | 10.995070 | 2.055416  |
| H | 19.165385 | 13.405601 | 0.676820  |
| H | 17.451658 | 12.984449 | 0.548943  |

|   |           |           |          |
|---|-----------|-----------|----------|
| H | 16.439229 | 13.432496 | 5.231131 |
| H | 17.634166 | 11.156310 | 4.604756 |
| H | 18.380713 | 12.980040 | 7.933743 |
| H | 18.053875 | 11.281871 | 7.252976 |

184

[F] scf done: -3350.729943 / Energies= -3348.997816 / Enthalpies= -3348.996872 / Free Energies= -3349.244362

|    |           |           |           |
|----|-----------|-----------|-----------|
| Mg | -5.618064 | -1.019804 | -1.094307 |
| N  | -7.458154 | -1.924682 | -0.908810 |
| C  | -7.591660 | -3.210355 | -1.522359 |
| C  | -7.255810 | -4.373688 | -0.791481 |
| C  | -7.300980 | -5.610155 | -1.442146 |
| C  | -7.666952 | -5.711407 | -2.779274 |
| C  | -7.993153 | -4.561364 | -3.488312 |
| C  | -7.963291 | -3.300990 | -2.883911 |
| N  | -6.196360 | 0.652344  | -0.040329 |
| C  | -7.407744 | 0.803909  | 0.495787  |
| C  | -8.451978 | -0.134111 | 0.386543  |
| C  | -8.487481 | -1.386196 | -0.258218 |
| C  | -9.794269 | -2.144709 | -0.184430 |
| C  | -6.811952 | -4.309228 | 0.663359  |
| C  | -7.618486 | -5.250495 | 1.568894  |
| C  | -8.293973 | -2.066144 | -3.709879 |
| C  | -9.654373 | -2.173167 | -4.412710 |
| C  | -5.210335 | 1.676690  | 0.125364  |
| C  | -4.283760 | 1.590426  | 1.190895  |
| C  | -3.265870 | 2.545549  | 1.273681  |
| C  | -3.154339 | 3.567191  | 0.338212  |
| C  | -4.074518 | 3.646780  | -0.700621 |
| C  | -5.111008 | 2.717296  | -0.828508 |
| C  | -4.353395 | 0.485430  | 2.235752  |
| C  | -4.433145 | 1.038543  | 3.666116  |
| C  | -6.082718 | 2.838383  | -1.994161 |
| C  | -6.736038 | 4.225662  | -2.072606 |
| C  | -3.168973 | -0.483838 | 2.099303  |
| C  | -5.395822 | 2.493045  | -3.324122 |
| C  | -7.715030 | 2.059198  | 1.282401  |
| C  | -5.307448 | -4.596995 | 0.788545  |
| C  | -7.180270 | -1.774964 | -4.728122 |
| C  | -3.842297 | -1.762658 | -1.988551 |
| C  | -3.072329 | -0.894246 | -2.994945 |
| C  | -1.816272 | -1.557012 | -3.575137 |
| C  | -1.062523 | -0.688094 | -4.583554 |
| C  | 0.183078  | -1.357749 | -5.166341 |
| C  | 0.930307  | -0.478922 | -6.167717 |
| C  | 1.997308  | 4.549325  | -0.321138 |
| C  | 2.995435  | 3.680130  | 0.455685  |
| C  | 2.354060  | 3.139211  | 1.743228  |
| C  | 4.295767  | 4.407488  | 0.765837  |
| C  | 5.556125  | 3.837200  | 0.470305  |
| C  | 6.748710  | 4.517836  | 0.809067  |
| C  | 6.654151  | 5.765112  | 1.433757  |
| C  | 5.421380  | 6.337119  | 1.724556  |
| C  | 4.255675  | 5.656415  | 1.392784  |
| N  | 5.625986  | 2.521908  | -0.088784 |
| Mg | 5.688288  | 0.962925  | 1.254301  |
| C  | 5.784025  | 1.002113  | 3.373965  |
| C  | 4.880750  | 0.071673  | 4.197422  |
| C  | 5.068968  | 0.186092  | 5.715700  |
| C  | 4.164938  | -0.742345 | 6.528471  |



|   |            |           |           |
|---|------------|-----------|-----------|
| C | 4.349766   | -0.615023 | 8.041559  |
| C | 3.444339   | -1.548304 | 8.843137  |
| C | 8.122216   | 3.916885  | 0.545200  |
| C | 9.031939   | 4.855313  | -0.260047 |
| C | 5.654522   | 2.364331  | -1.411225 |
| C | 5.602110   | 3.585783  | -2.302406 |
| C | 5.734662   | 1.117419  | -2.060927 |
| C | 5.791748   | -0.184560 | -1.527008 |
| C | 5.879965   | -1.315421 | -2.528044 |
| N | 5.769731   | -0.467880 | -0.224942 |
| C | 5.824078   | -1.829633 | 0.213234  |
| C | 4.624388   | -2.557602 | 0.395442  |
| C | 4.698427   | -3.847826 | 0.928596  |
| C | 5.917287   | -4.420638 | 1.272702  |
| C | 7.090053   | -3.699890 | 1.081725  |
| C | 7.070917   | -2.405222 | 0.553883  |
| C | 3.263141   | -1.969503 | 0.050403  |
| C | 2.451681   | -1.668666 | 1.319655  |
| C | 8.383287   | -1.654194 | 0.376742  |
| C | 9.374850   | -2.418325 | -0.512745 |
| C | 9.021941   | -1.321640 | 1.733907  |
| C | 2.458770   | -2.871963 | -0.896231 |
| C | 8.800058   | 3.504671  | 1.861435  |
| H | 1.816711   | -0.985772 | -6.567314 |
| H | -7.604008  | 2.950083  | 0.654854  |
| H | -8.731234  | 2.040089  | 1.681963  |
| H | -7.013809  | 2.177331  | 2.115688  |
| H | -9.375266  | 0.151937  | 0.877031  |
| H | -10.555581 | -1.577154 | 0.355181  |
| H | -10.170531 | -2.369689 | -1.188338 |
| H | -9.656470  | -3.108521 | 0.318022  |
| H | -5.271578  | -0.085268 | 2.056619  |
| H | -5.277063  | 1.726833  | 3.787749  |
| H | -4.558613  | 0.218990  | 4.383906  |
| H | -3.521013  | 1.580261  | 3.942906  |
| H | -2.216764  | 0.028314  | 2.283097  |
| H | -3.253859  | -1.302747 | 2.824118  |
| H | -3.118370  | -0.919595 | 1.095016  |
| H | -2.546035  | 2.486824  | 2.086905  |
| H | -2.355133  | 4.299714  | 0.419324  |
| H | -3.985124  | 4.447664  | -1.431028 |
| H | -6.883900  | 2.107577  | -1.838461 |
| H | -6.002324  | 5.007801  | -2.301006 |
| H | -7.492738  | 4.244616  | -2.866060 |
| H | -7.226434  | 4.497288  | -1.131084 |
| H | -4.956772  | 1.489489  | -3.302831 |
| H | -6.112874  | 2.535695  | -4.153345 |
| H | -4.585386  | 3.198566  | -3.544051 |
| H | -8.347048  | -1.212320 | -3.025203 |
| H | -10.461229 | -2.381031 | -3.700946 |
| H | -9.891098  | -1.234748 | -4.928399 |
| H | -9.661600  | -2.970898 | -5.164758 |
| H | -7.084900  | -2.593761 | -5.451640 |
| H | -7.394658  | -0.855467 | -5.286736 |
| H | -6.206349  | -1.659146 | -4.237953 |
| H | -8.273440  | -4.642277 | -4.536056 |
| H | -7.694448  | -6.682328 | -3.267602 |
| H | -7.038587  | -6.510654 | -0.891776 |
| H | -6.983894  | -3.287281 | 1.019220  |
| H | -7.446071  | -6.303751 | 1.317876  |

|   |           |           |           |
|---|-----------|-----------|-----------|
| H | -7.327254 | -5.111980 | 2.616994  |
| H | -8.695350 | -5.063516 | 1.489796  |
| H | -4.712604 | -3.908479 | 0.177280  |
| H | -4.978888 | -4.501429 | 1.830875  |
| H | -5.073917 | -5.614973 | 0.453900  |
| H | 5.599330  | 2.044419  | 3.687209  |
| H | 6.831859  | 0.811284  | 3.667441  |
| H | 3.821204  | 0.273859  | 3.970304  |
| H | 5.047397  | -0.976898 | 3.905556  |
| H | 4.890059  | 1.229222  | 6.018798  |
| H | 6.121810  | -0.023186 | 5.960203  |
| H | 4.350605  | -1.785215 | 6.228431  |
| H | 3.112745  | -0.538711 | 6.275628  |
| H | 5.400427  | -0.816838 | 8.295642  |
| H | 4.161126  | 0.425814  | 8.341991  |
| H | 3.636378  | -2.598939 | 8.591744  |
| H | 3.598231  | -1.431465 | 9.922447  |
| H | 2.385699  | -1.348772 | 8.634642  |
| H | 4.990253  | -1.952590 | -2.473492 |
| H | 6.737951  | -1.960892 | -2.312967 |
| H | 5.971225  | -0.937523 | -3.548693 |
| H | 5.754765  | 1.167275  | -3.143526 |
| H | 4.689795  | 4.163269  | -2.116554 |
| H | 5.631320  | 3.310662  | -3.358870 |
| H | 6.441821  | 4.257046  | -2.091941 |
| H | 3.431863  | -1.018234 | -0.466204 |
| H | 3.024459  | -3.117931 | -1.801912 |
| H | 1.531233  | -2.373175 | -1.201094 |
| H | 2.178882  | -3.816671 | -0.415194 |
| H | 2.240920  | -2.588440 | 1.878547  |
| H | 1.491717  | -1.203322 | 1.064069  |
| H | 2.990560  | -0.994452 | 1.994669  |
| H | 3.782218  | -4.414295 | 1.078882  |
| H | 5.952806  | -5.425223 | 1.686853  |
| H | 8.042877  | -4.150519 | 1.350203  |
| H | 8.159304  | -0.706658 | -0.126032 |
| H | 9.682489  | -3.365441 | -0.054059 |
| H | 10.280404 | -1.821166 | -0.674544 |
| H | 8.943388  | -2.649933 | -1.492963 |
| H | 8.339705  | -0.745148 | 2.368708  |
| H | 9.939394  | -0.736032 | 1.596725  |
| H | 9.286288  | -2.234894 | 2.280538  |
| H | 7.980049  | 3.009243  | -0.052009 |
| H | 8.562768  | 5.164168  | -1.200907 |
| H | 9.976772  | 4.353899  | -0.502021 |
| H | 9.278050  | 5.764144  | 0.301803  |
| H | 8.978950  | 4.377474  | 2.500991  |
| H | 9.767971  | 3.026429  | 1.666552  |
| H | 8.179591  | 2.803864  | 2.431594  |
| H | 7.564762  | 6.295653  | 1.702125  |
| H | 5.368997  | 7.307551  | 2.211901  |
| H | 3.292610  | 6.103007  | 1.628897  |
| H | 3.238285  | 2.819346  | -0.177200 |
| H | 1.646990  | 5.400214  | 0.275210  |
| H | 1.116017  | 3.958656  | -0.598637 |
| H | 2.439321  | 4.948925  | -1.240876 |
| H | 3.043162  | 2.487327  | 2.293232  |
| H | 1.447899  | 2.564651  | 1.514742  |
| H | 2.074487  | 3.958202  | 2.417341  |
| H | -2.776892 | 0.058424  | -2.528145 |

|   |           |           |           |
|---|-----------|-----------|-----------|
| H | -1.141762 | -1.826597 | -2.747681 |
| H | -1.741687 | -0.413099 | -5.405455 |
| H | -0.772201 | 0.259000  | -4.102969 |
| H | 0.860924  | -1.636117 | -4.346516 |
| H | -0.107342 | -2.300903 | -5.651208 |
| H | 1.263516  | 0.456920  | -5.701483 |
| H | 0.288852  | -0.212356 | -7.017109 |
| H | -3.727814 | -0.616967 | -3.836908 |
| H | -2.102975 | -2.506835 | -4.052056 |
| H | -3.146368 | -2.056456 | -1.182825 |
| H | -4.111754 | -2.715149 | -2.477471 |

199

[G] scf done: -3873.549815 / Energies= -3871.691918 / Enthalpies= -3871.690974 /

Free Energies= -3871.968673

|    |           |           |           |
|----|-----------|-----------|-----------|
| C  | 26.977003 | 10.836563 | 10.125609 |
| C  | 26.167833 | 11.622411 | 9.272167  |
| C  | 24.853389 | 11.209139 | 8.949015  |
| C  | 24.373595 | 10.014732 | 9.494191  |
| C  | 25.159678 | 9.235337  | 10.335181 |
| C  | 26.449798 | 9.649177  | 10.643329 |
| N  | 26.649223 | 12.887083 | 8.805631  |
| C  | 27.233720 | 12.973230 | 7.610207  |
| C  | 27.400861 | 11.721090 | 6.777526  |
| C  | 23.944261 | 12.043073 | 8.056921  |
| C  | 23.330542 | 11.228625 | 6.909533  |
| C  | 28.392050 | 11.249751 | 10.504219 |
| C  | 28.491285 | 11.593020 | 11.998434 |
| C  | 27.714938 | 14.167787 | 7.041177  |
| C  | 27.707474 | 15.483922 | 7.543567  |
| C  | 28.291003 | 16.550562 | 6.643350  |
| N  | 27.227473 | 15.829783 | 8.736446  |
| C  | 27.279747 | 17.196217 | 9.158068  |
| C  | 26.175679 | 18.046553 | 8.916652  |
| C  | 26.211846 | 19.350739 | 9.418887  |
| C  | 27.303586 | 19.817546 | 10.141591 |
| C  | 28.381933 | 18.972222 | 10.375077 |
| C  | 28.394232 | 17.658910 | 9.895741  |
| C  | 24.943735 | 17.566509 | 8.163051  |
| C  | 23.758825 | 17.370623 | 9.122192  |
| C  | 29.580640 | 16.758721 | 10.210414 |
| C  | 29.605829 | 16.388693 | 11.701844 |
| C  | 24.553145 | 18.498881 | 7.008000  |
| C  | 30.920056 | 17.375729 | 9.784428  |
| C  | 22.840738 | 12.722360 | 8.882502  |
| C  | 29.430063 | 10.183559 | 10.124731 |
| H  | 23.253277 | 16.288935 | 2.510935  |
| Si | 21.827442 | 16.041724 | 2.165424  |
| C  | 20.742286 | 17.284276 | 3.055610  |
| C  | 19.373435 | 17.039253 | 3.255338  |
| C  | 18.561638 | 17.975458 | 3.894187  |
| C  | 19.107010 | 19.176365 | 4.348938  |
| C  | 20.463925 | 19.436431 | 4.163503  |
| C  | 21.272381 | 18.497557 | 3.523469  |
| H  | 21.691324 | 16.139348 | 0.686388  |
| C  | 14.658278 | 12.001080 | 4.577373  |
| C  | 15.587146 | 12.908234 | 3.756722  |
| C  | 15.412381 | 12.781656 | 2.237771  |
| C  | 16.341635 | 13.682627 | 1.422561  |
| C  | 16.167119 | 13.542666 | -0.090689 |
| C  | 17.098978 | 14.446992 | -0.895025 |

|    |           |           |           |
|----|-----------|-----------|-----------|
| Mg | 26.390901 | 14.496658 | 10.063484 |
| C  | 17.957588 | 9.689499  | 6.196620  |
| C  | 17.269725 | 9.186047  | 7.475357  |
| C  | 15.942279 | 8.518147  | 7.146918  |
| C  | 14.704412 | 9.135756  | 7.441366  |
| C  | 13.487172 | 8.508825  | 7.086766  |
| C  | 13.535174 | 7.266120  | 6.447968  |
| C  | 14.745592 | 6.647196  | 6.158909  |
| C  | 15.935753 | 7.275652  | 6.506013  |
| N  | 14.686246 | 10.445590 | 8.017720  |
| C  | 14.635970 | 10.586145 | 9.341139  |
| C  | 14.608043 | 9.351834  | 10.215503 |
| C  | 12.138201 | 9.163930  | 7.347406  |
| C  | 11.496846 | 9.634033  | 6.032341  |
| C  | 18.211681 | 8.274244  | 8.273348  |
| C  | 14.607061 | 11.826848 | 10.007664 |
| C  | 14.647556 | 13.136978 | 9.493713  |
| C  | 14.609951 | 14.256294 | 10.510931 |
| N  | 14.720916 | 13.437544 | 8.196751  |
| C  | 14.786201 | 14.806227 | 7.783367  |
| C  | 13.600362 | 15.481790 | 7.410498  |
| C  | 13.699347 | 16.784959 | 6.913490  |
| C  | 14.929499 | 17.418932 | 6.785292  |
| C  | 16.088409 | 16.747607 | 7.158567  |
| C  | 16.043751 | 15.443455 | 7.660949  |
| C  | 12.229997 | 14.829346 | 7.524455  |
| C  | 11.616394 | 14.575580 | 6.138936  |
| C  | 17.342157 | 14.740944 | 8.032829  |
| C  | 18.147641 | 14.375021 | 6.776627  |
| C  | 11.176351 | 8.250939  | 8.120642  |
| C  | 11.267961 | 15.646337 | 8.399094  |
| C  | 18.202775 | 15.565380 | 9.000638  |
| C  | 25.699057 | 14.825145 | 12.041836 |
| C  | 24.365619 | 14.218938 | 12.504887 |
| C  | 24.009898 | 14.519446 | 13.966597 |
| C  | 22.674331 | 13.927879 | 14.420772 |
| C  | 22.328183 | 14.236413 | 15.878442 |
| C  | 20.991621 | 13.644946 | 16.322474 |
| Mg | 14.733658 | 12.024879 | 6.697980  |
| H  | 15.537666 | 14.838609 | 10.483000 |
| H  | 13.797094 | 14.956413 | 10.291242 |
| H  | 14.476045 | 13.869613 | 11.523528 |
| H  | 14.555044 | 11.762772 | 11.088443 |
| H  | 14.573648 | 9.613833  | 11.275128 |
| H  | 13.739387 | 8.726897  | 9.981207  |
| H  | 15.493368 | 8.731609  | 10.037059 |
| H  | 17.082596 | 13.805627 | 8.540543  |
| H  | 17.644692 | 15.847917 | 9.900391  |
| H  | 19.079877 | 14.987361 | 9.315192  |
| H  | 18.568271 | 16.487725 | 8.534437  |
| H  | 18.454359 | 15.273809 | 6.228400  |
| H  | 19.054450 | 13.819468 | 7.045972  |
| H  | 17.561008 | 13.756356 | 6.087747  |
| H  | 17.050335 | 17.243962 | 7.055091  |
| H  | 14.983830 | 18.433774 | 6.398702  |
| H  | 12.794228 | 17.312013 | 6.620159  |
| H  | 12.365082 | 13.856597 | 8.010697  |
| H  | 11.046184 | 16.623198 | 7.953182  |
| H  | 10.315991 | 15.114867 | 8.517478  |
| H  | 11.681809 | 15.824357 | 9.397918  |

|   |           |           |           |
|---|-----------|-----------|-----------|
| H | 12.275448 | 13.962876 | 5.513606  |
| H | 10.653684 | 14.057821 | 6.231360  |
| H | 11.439205 | 15.517653 | 5.605862  |
| H | 12.312554 | 10.051709 | 7.965530  |
| H | 11.618882 | 7.897755  | 9.058870  |
| H | 10.253598 | 8.791074  | 8.364421  |
| H | 10.893285 | 7.368340  | 7.534842  |
| H | 11.285775 | 8.783942  | 5.372235  |
| H | 10.549797 | 10.152924 | 6.225892  |
| H | 12.156477 | 10.316550 | 5.484474  |
| H | 12.605763 | 6.776352  | 6.167042  |
| H | 14.761519 | 5.680997  | 5.660776  |
| H | 16.881419 | 6.792826  | 6.270899  |
| H | 17.056338 | 10.060210 | 8.100765  |
| H | 18.531668 | 7.404702  | 7.687076  |
| H | 19.115455 | 8.823423  | 8.563613  |
| H | 17.735120 | 7.901487  | 9.186976  |
| H | 17.309556 | 10.370752 | 5.632565  |
| H | 18.886482 | 10.221011 | 6.437353  |
| H | 18.209725 | 8.855297  | 5.530557  |
| H | 25.660796 | 15.918587 | 12.189224 |
| H | 26.489491 | 14.485305 | 12.735068 |
| H | 23.541888 | 14.586833 | 11.871542 |
| H | 24.374780 | 13.126420 | 12.367724 |
| H | 23.994851 | 15.610691 | 14.111121 |
| H | 24.815992 | 14.140348 | 14.613566 |
| H | 22.690935 | 12.836455 | 14.276971 |
| H | 21.869493 | 14.305751 | 13.771184 |
| H | 23.130239 | 13.857391 | 16.528169 |
| H | 22.312645 | 15.326411 | 16.022572 |
| H | 20.989832 | 12.552043 | 16.224812 |
| H | 20.771693 | 13.885244 | 17.369425 |
| H | 20.165528 | 14.030916 | 15.712023 |
| H | 26.425647 | 11.308597 | 6.495800  |
| H | 27.915626 | 10.939618 | 7.346224  |
| H | 27.966640 | 11.922483 | 5.865339  |
| H | 28.155379 | 14.058280 | 6.056814  |
| H | 27.544920 | 17.322332 | 6.423931  |
| H | 28.642792 | 16.127784 | 5.699852  |
| H | 29.128487 | 17.059778 | 7.132559  |
| H | 24.552021 | 12.835835 | 7.607263  |
| H | 24.098671 | 10.721151 | 6.315221  |
| H | 22.763502 | 11.885293 | 6.238919  |
| H | 22.638987 | 10.462086 | 7.278857  |
| H | 22.191035 | 11.977477 | 9.357988  |
| H | 22.215511 | 13.359254 | 8.244539  |
| H | 23.259069 | 13.344537 | 9.681737  |
| H | 23.362916 | 9.689973  | 9.258146  |
| H | 24.767695 | 8.309572  | 10.749021 |
| H | 27.062805 | 9.037718  | 11.301709 |
| H | 28.636218 | 12.156125 | 9.938455  |
| H | 29.280726 | 9.254878  | 10.688289 |
| H | 30.442959 | 10.542460 | 10.343816 |
| H | 29.383182 | 9.935294  | 9.058545  |
| H | 27.778979 | 12.377071 | 12.278584 |
| H | 29.500784 | 11.941964 | 12.248520 |
| H | 28.277105 | 10.716232 | 12.621492 |
| H | 29.454254 | 15.830278 | 9.642424  |
| H | 30.922212 | 17.644669 | 8.722126  |
| H | 31.737490 | 16.664739 | 9.954513  |

|   |           |           |           |
|---|-----------|-----------|-----------|
| H | 31.150858 | 18.282529 | 10.356011 |
| H | 29.745911 | 17.279597 | 12.326171 |
| H | 30.429126 | 15.695797 | 11.915727 |
| H | 28.668574 | 15.914598 | 12.015113 |
| H | 29.231963 | 19.337515 | 10.946725 |
| H | 27.312413 | 20.835044 | 10.524437 |
| H | 25.366048 | 20.011554 | 9.243856  |
| H | 25.180304 | 16.589545 | 7.726758  |
| H | 24.243236 | 19.486491 | 7.369465  |
| H | 23.710605 | 18.076578 | 6.447771  |
| H | 25.384976 | 18.647263 | 6.310096  |
| H | 24.008155 | 16.679236 | 9.935936  |
| H | 22.888002 | 16.971992 | 8.587381  |
| H | 23.464651 | 18.321581 | 9.582874  |
| H | 14.822108 | 10.954172 | 4.267624  |
| H | 13.616836 | 12.213130 | 4.275402  |
| H | 15.434788 | 13.962140 | 4.037512  |
| H | 15.574373 | 11.732203 | 1.947651  |
| H | 14.366256 | 13.008015 | 1.980223  |
| H | 16.173657 | 14.732564 | 1.709035  |
| H | 17.387423 | 13.459237 | 1.686142  |
| H | 15.123124 | 13.763993 | -0.355491 |
| H | 16.335769 | 12.494685 | -0.377562 |
| H | 16.929643 | 15.504395 | -0.656060 |
| H | 16.949493 | 14.322634 | -1.974031 |
| H | 18.151551 | 14.225024 | -0.678367 |
| H | 21.466412 | 14.653814 | 2.560141  |
| H | 18.930141 | 16.106766 | 2.911063  |
| H | 17.504842 | 17.765295 | 4.038838  |
| H | 18.475413 | 19.908106 | 4.846957  |
| H | 20.893965 | 20.370023 | 4.518126  |
| H | 22.330513 | 18.714577 | 3.389599  |

199

[TS-GH] scf done: -3873.511759 / Energies= -3871.654823 / Enthalpies= -3871.653879  
 / Free Energies= -3871.913181

|   |           |           |           |
|---|-----------|-----------|-----------|
| C | 27.696919 | 11.116438 | 9.573384  |
| C | 26.611380 | 11.757533 | 8.931671  |
| C | 25.378044 | 11.084648 | 8.761708  |
| C | 25.255568 | 9.780954  | 9.251310  |
| C | 26.313471 | 9.143237  | 9.889078  |
| C | 27.522291 | 9.811034  | 10.043464 |
| N | 26.734597 | 13.127808 | 8.536249  |
| C | 27.100498 | 13.429477 | 7.291087  |
| C | 27.384691 | 12.310938 | 6.312843  |
| C | 24.181702 | 11.748295 | 8.093486  |
| C | 23.573019 | 10.887861 | 6.977426  |
| C | 29.039184 | 11.806385 | 9.772770  |
| C | 29.322602 | 12.060756 | 11.261197 |
| C | 27.241225 | 14.741182 | 6.797567  |
| C | 27.042558 | 15.979966 | 7.437307  |
| C | 27.269718 | 17.215716 | 6.594625  |
| N | 26.673989 | 16.118435 | 8.709789  |
| C | 26.493067 | 17.424677 | 9.265095  |
| C | 25.214609 | 18.028945 | 9.229722  |
| C | 25.038806 | 19.262377 | 9.863994  |
| C | 26.088692 | 19.895797 | 10.518531 |
| C | 27.340349 | 19.292342 | 10.548015 |
| C | 27.568179 | 18.058501 | 9.930800  |
| C | 24.026735 | 17.357481 | 8.555907  |
| C | 23.027243 | 16.838928 | 9.601789  |

|    |           |           |           |
|----|-----------|-----------|-----------|
| C  | 28.947569 | 17.421342 | 10.019593 |
| C  | 29.245687 | 16.952494 | 11.452463 |
| C  | 23.322186 | 18.274966 | 7.546635  |
| C  | 30.058957 | 18.352312 | 9.514743  |
| C  | 23.109587 | 12.119190 | 9.129556  |
| C  | 30.194032 | 11.023258 | 9.131255  |
| H  | 19.869437 | 12.911470 | 6.454541  |
| Si | 18.548804 | 13.033395 | 5.669708  |
| C  | 18.935628 | 14.784611 | 5.028025  |
| C  | 17.995218 | 15.807198 | 4.834858  |
| C  | 18.377438 | 17.073222 | 4.390067  |
| C  | 19.715130 | 17.336489 | 4.100224  |
| C  | 20.668988 | 16.334616 | 4.280883  |
| C  | 20.281817 | 15.084159 | 4.760417  |
| H  | 18.799137 | 11.803414 | 4.833176  |
| C  | 16.579474 | 12.910390 | 4.764714  |
| C  | 16.835474 | 13.036167 | 3.255215  |
| C  | 15.699372 | 12.556831 | 2.346867  |
| C  | 16.008396 | 12.736270 | 0.859190  |
| C  | 14.883190 | 12.261163 | -0.061452 |
| C  | 15.198033 | 12.450408 | -1.544042 |
| Mg | 26.318680 | 14.537412 | 9.978865  |
| C  | 18.937302 | 9.593097  | 7.707109  |
| C  | 17.513217 | 9.648845  | 8.273917  |
| C  | 16.458268 | 9.183165  | 7.279052  |
| C  | 15.256147 | 9.899751  | 7.064687  |
| C  | 14.268736 | 9.403058  | 6.179166  |
| C  | 14.519209 | 8.203049  | 5.506419  |
| C  | 15.698140 | 7.494139  | 5.702794  |
| C  | 16.651194 | 7.982417  | 6.588231  |
| N  | 15.073150 | 11.172173 | 7.695974  |
| C  | 14.298069 | 11.278326 | 8.774886  |
| C  | 13.680346 | 10.041762 | 9.393345  |
| C  | 12.952158 | 10.127979 | 5.929152  |
| C  | 12.897216 | 10.725794 | 4.516225  |
| C  | 17.428902 | 8.846673  | 9.582942  |
| C  | 13.953054 | 12.493525 | 9.398997  |
| C  | 14.225247 | 13.828275 | 9.044942  |
| C  | 13.592416 | 14.877211 | 9.934362  |
| N  | 14.998817 | 14.204368 | 8.023661  |
| C  | 15.170319 | 15.599014 | 7.740584  |
| C  | 14.364758 | 16.203891 | 6.744321  |
| C  | 14.565042 | 17.556941 | 6.451761  |
| C  | 15.540667 | 18.301067 | 7.104815  |
| C  | 16.336063 | 17.691868 | 8.067026  |
| C  | 16.172030 | 16.345362 | 8.406842  |
| C  | 13.268301 | 15.438980 | 6.013915  |
| C  | 13.339374 | 15.615469 | 4.490675  |
| C  | 17.081884 | 15.739731 | 9.467272  |
| C  | 18.541056 | 15.683086 | 8.990097  |
| C  | 11.735619 | 9.220508  | 6.167205  |
| C  | 11.872853 | 15.832421 | 6.524550  |
| C  | 17.000712 | 16.495750 | 10.802924 |
| C  | 25.887208 | 14.510279 | 12.056908 |
| C  | 24.794610 | 13.572823 | 12.592886 |
| C  | 24.642098 | 13.583733 | 14.119495 |
| C  | 23.554420 | 12.644519 | 14.643803 |
| C  | 23.420165 | 12.644029 | 16.167591 |
| C  | 22.334271 | 11.699413 | 16.679469 |
| Mg | 16.045086 | 12.813118 | 6.950866  |

|   |           |           |           |
|---|-----------|-----------|-----------|
| H | 13.252360 | 15.744374 | 9.363111  |
| H | 12.748022 | 14.462341 | 10.489572 |
| H | 14.324978 | 15.244041 | 10.662627 |
| H | 13.325900 | 12.381090 | 10.276774 |
| H | 13.551197 | 10.177302 | 10.470622 |
| H | 12.687411 | 9.860936  | 8.964440  |
| H | 14.280720 | 9.147661  | 9.213654  |
| H | 16.751574 | 14.710352 | 9.646650  |
| H | 15.971610 | 16.584607 | 11.167458 |
| H | 17.589065 | 15.976311 | 11.568502 |
| H | 17.405024 | 17.510954 | 10.712525 |
| H | 18.938270 | 16.690653 | 8.818677  |
| H | 19.170420 | 15.198320 | 9.746203  |
| H | 18.644749 | 15.126264 | 8.054434  |
| H | 17.105571 | 18.274327 | 8.567749  |
| H | 15.681364 | 19.351675 | 6.863309  |
| H | 13.941985 | 18.036790 | 5.700892  |
| H | 13.405718 | 14.373310 | 6.233102  |
| H | 11.680328 | 16.898579 | 6.353067  |
| H | 11.095871 | 15.261959 | 6.001006  |
| H | 11.763741 | 15.641565 | 7.596942  |
| H | 14.331525 | 15.368454 | 4.097814  |
| H | 12.607802 | 14.962748 | 3.999869  |
| H | 13.111305 | 16.644175 | 4.187928  |
| H | 12.884129 | 10.962080 | 6.635373  |
| H | 11.762834 | 8.752456  | 7.157194  |
| H | 10.808245 | 9.800633  | 6.089564  |
| H | 11.679769 | 8.415629  | 5.424853  |
| H | 12.968275 | 9.942974  | 3.751379  |
| H | 11.952170 | 11.261001 | 4.360672  |
| H | 13.717865 | 11.429591 | 4.345975  |
| H | 13.773112 | 7.814607  | 4.817143  |
| H | 15.871495 | 6.561706  | 5.171425  |
| H | 17.566256 | 7.418416  | 6.748897  |
| H | 17.299607 | 10.695076 | 8.523894  |
| H | 17.614960 | 7.781234  | 9.399945  |
| H | 18.179973 | 9.201776  | 10.298952 |
| H | 16.445135 | 8.937502  | 10.055174 |
| H | 19.016873 | 10.129542 | 6.756429  |
| H | 19.639182 | 10.052736 | 8.411768  |
| H | 19.269569 | 8.561201  | 7.541259  |
| H | 25.653002 | 15.543896 | 12.364705 |
| H | 26.829384 | 14.275783 | 12.584934 |
| H | 23.820490 | 13.836497 | 12.150007 |
| H | 24.989963 | 12.537219 | 12.273587 |
| H | 24.430468 | 14.612004 | 14.450932 |
| H | 25.607790 | 13.312584 | 14.573449 |
| H | 23.763697 | 11.619788 | 14.299884 |
| H | 22.587096 | 12.920999 | 14.196348 |
| H | 24.386156 | 12.368060 | 16.614576 |
| H | 23.208862 | 13.666475 | 16.512747 |
| H | 22.535581 | 10.664035 | 16.377011 |
| H | 22.264784 | 11.718664 | 17.773600 |
| H | 21.350031 | 11.973115 | 16.278939 |
| H | 26.482088 | 11.716060 | 6.134169  |
| H | 28.136342 | 11.621879 | 6.712216  |
| H | 27.738125 | 12.699348 | 5.355216  |
| H | 27.546779 | 14.807448 | 5.759685  |
| H | 26.352268 | 17.810681 | 6.523552  |
| H | 27.593988 | 16.955617 | 5.584625  |



|   |           |           |           |
|---|-----------|-----------|-----------|
| H | 28.025648 | 17.864670 | 7.049703  |
| H | 24.528826 | 12.680253 | 7.633847  |
| H | 24.322051 | 10.607026 | 6.228005  |
| H | 22.771097 | 11.437010 | 6.470676  |
| H | 23.134954 | 9.962577  | 7.369814  |
| H | 22.717602 | 11.222559 | 9.625226  |
| H | 22.269216 | 12.635027 | 8.649851  |
| H | 23.513582 | 12.770516 | 9.913193  |
| H | 24.311092 | 9.255298  | 9.132012  |
| H | 26.196052 | 8.129101  | 10.263067 |
| H | 28.349615 | 9.309356  | 10.540409 |
| H | 28.989643 | 12.780225 | 9.272594  |
| H | 30.337739 | 10.048831 | 9.613047  |
| H | 31.133617 | 11.580682 | 9.228035  |
| H | 30.016970 | 10.842489 | 8.065205  |
| H | 28.525844 | 12.650983 | 11.727309 |
| H | 30.268261 | 12.602399 | 11.387398 |
| H | 29.400893 | 11.117929 | 11.816021 |
| H | 28.946657 | 16.534584 | 9.375783  |
| H | 29.865684 | 18.695330 | 8.492088  |
| H | 31.023918 | 17.831202 | 9.520133  |
| H | 30.162697 | 19.240940 | 10.148519 |
| H | 29.278535 | 17.801809 | 12.145652 |
| H | 30.216421 | 16.443384 | 11.499376 |
| H | 28.478190 | 16.261119 | 11.818563 |
| H | 28.158563 | 19.787428 | 11.066131 |
| H | 25.931279 | 20.854434 | 11.006725 |
| H | 24.058554 | 19.733010 | 9.848651  |
| H | 24.403435 | 16.491171 | 8.001000  |
| H | 22.852851 | 19.135399 | 8.038357  |
| H | 22.531947 | 17.727134 | 7.020075  |
| H | 24.022082 | 18.664013 | 6.798137  |
| H | 23.505711 | 16.156067 | 10.314108 |
| H | 22.200281 | 16.305433 | 9.118187  |
| H | 22.602553 | 17.667634 | 10.181569 |
| H | 16.189903 | 11.877778 | 4.920939  |
| H | 15.729051 | 13.606241 | 4.971308  |
| H | 17.069837 | 14.081683 | 3.021727  |
| H | 15.494134 | 11.495447 | 2.549905  |
| H | 14.774645 | 13.101065 | 2.591411  |
| H | 16.218272 | 13.797422 | 0.657253  |
| H | 16.932921 | 12.193137 | 0.612337  |
| H | 13.958636 | 12.801640 | 0.188472  |
| H | 14.676821 | 11.199625 | 0.137208  |
| H | 15.376311 | 13.507042 | -1.779265 |
| H | 14.373955 | 12.102870 | -2.177914 |
| H | 16.097695 | 11.892808 | -1.832427 |
| H | 17.882353 | 12.872145 | 7.131076  |
| H | 16.943182 | 15.627053 | 5.043520  |
| H | 17.627959 | 17.851918 | 4.270867  |
| H | 20.014233 | 18.318708 | 3.741361  |
| H | 21.715434 | 16.531107 | 4.057616  |
| H | 21.039887 | 14.322900 | 4.938209  |
| H | 17.742951 | 12.464802 | 3.009457  |

199

[H] scf done: -3873.564272 / Energies= -3871.707369 / Enthalpies= -3871.706425 / Free Energies= -3871.980767

|   |           |           |          |
|---|-----------|-----------|----------|
| C | 27.790703 | 11.066671 | 9.457563 |
| C | 26.837586 | 11.696419 | 8.623281 |
| C | 25.693127 | 10.990620 | 8.181363 |

|    |           |           |           |
|----|-----------|-----------|-----------|
| C  | 25.524293 | 9.665200  | 8.592566  |
| C  | 26.453248 | 9.037356  | 9.414528  |
| C  | 27.575472 | 9.738382  | 9.838378  |
| N  | 26.985037 | 13.083879 | 8.303324  |
| C  | 27.577685 | 13.444675 | 7.165109  |
| C  | 28.095647 | 12.373367 | 6.230722  |
| C  | 24.633192 | 11.643446 | 7.304857  |
| C  | 24.293130 | 10.807601 | 6.063279  |
| C  | 29.030943 | 11.792003 | 9.960601  |
| C  | 28.983934 | 11.986077 | 11.483909 |
| C  | 27.762234 | 14.777494 | 6.749945  |
| C  | 27.413440 | 15.984876 | 7.386331  |
| C  | 27.760887 | 17.259604 | 6.649599  |
| N  | 26.811783 | 16.062376 | 8.571647  |
| C  | 26.529809 | 17.340738 | 9.149568  |
| C  | 25.275973 | 17.954057 | 8.920872  |
| C  | 24.988253 | 19.153760 | 9.578546  |
| C  | 25.905144 | 19.745610 | 10.439603 |
| C  | 27.135039 | 19.135139 | 10.654899 |
| C  | 27.470948 | 17.934032 | 10.023237 |
| C  | 24.228973 | 17.324633 | 8.012986  |
| C  | 23.083223 | 16.717850 | 8.838180  |
| C  | 28.816830 | 17.286403 | 10.316389 |
| C  | 28.865209 | 16.748073 | 11.754908 |
| C  | 23.678858 | 18.306862 | 6.969900  |
| C  | 29.996183 | 18.233565 | 10.054422 |
| C  | 23.362468 | 11.943445 | 8.114591  |
| C  | 30.326820 | 11.078836 | 9.547636  |
| H  | 20.509860 | 12.287186 | 4.897536  |
| Si | 20.107560 | 13.000625 | 3.649874  |
| C  | 19.986531 | 14.849903 | 3.966224  |
| C  | 18.978879 | 15.379018 | 4.792685  |
| C  | 18.885586 | 16.750767 | 5.023466  |
| C  | 19.799483 | 17.623290 | 4.431316  |
| C  | 20.805599 | 17.119076 | 3.608207  |
| C  | 20.895040 | 15.745599 | 3.379373  |
| H  | 21.200216 | 12.792460 | 2.652758  |
| C  | 18.490054 | 12.268098 | 3.013721  |
| C  | 17.989806 | 12.881929 | 1.699343  |
| C  | 16.677337 | 12.268236 | 1.204848  |
| C  | 16.168973 | 12.885858 | -0.098514 |
| C  | 14.858337 | 12.273510 | -0.595548 |
| C  | 14.356211 | 12.898513 | -1.895573 |
| Mg | 26.240802 | 14.422865 | 9.678192  |
| C  | 18.585955 | 10.712723 | 9.141626  |
| C  | 17.281957 | 10.152572 | 9.731616  |
| C  | 16.459809 | 9.454464  | 8.657893  |
| C  | 15.261393 | 10.009578 | 8.153396  |
| C  | 14.541769 | 9.356327  | 7.125916  |
| C  | 15.039196 | 8.149965  | 6.623923  |
| C  | 16.213945 | 7.592218  | 7.114967  |
| C  | 16.913525 | 8.245020  | 8.122822  |
| N  | 14.827689 | 11.293104 | 8.617216  |
| C  | 13.988290 | 11.383764 | 9.648488  |
| C  | 13.500223 | 10.117137 | 10.315472 |
| C  | 13.271994 | 9.949650  | 6.532886  |
| C  | 13.534943 | 10.502069 | 5.122884  |
| C  | 17.579329 | 9.243078  | 10.931979 |
| C  | 13.510129 | 12.597354 | 10.180958 |
| C  | 13.780416 | 13.927535 | 9.804275  |

|    |           |           |           |
|----|-----------|-----------|-----------|
| C  | 13.098139 | 15.009159 | 10.611642 |
| N  | 14.585808 | 14.275914 | 8.801267  |
| C  | 14.806515 | 15.657300 | 8.498698  |
| C  | 14.007681 | 16.294400 | 7.520638  |
| C  | 14.304669 | 17.614833 | 7.170102  |
| C  | 15.359212 | 18.300300 | 7.762458  |
| C  | 16.139533 | 17.662401 | 8.720230  |
| C  | 15.884835 | 16.342487 | 9.105168  |
| C  | 12.864878 | 15.571442 | 6.822354  |
| C  | 13.226029 | 15.257014 | 5.361783  |
| C  | 16.791968 | 15.671051 | 10.126449 |
| C  | 18.171388 | 15.372534 | 9.517784  |
| C  | 12.103996 | 8.954059  | 6.514533  |
| C  | 11.541753 | 16.345788 | 6.898073  |
| C  | 16.938030 | 16.488496 | 11.417493 |
| C  | 25.370931 | 14.351741 | 11.612926 |
| C  | 24.206111 | 13.394542 | 11.905607 |
| C  | 23.700378 | 13.441222 | 13.353335 |
| C  | 22.534821 | 12.493095 | 13.640573 |
| C  | 22.037026 | 12.549543 | 15.085903 |
| C  | 20.872341 | 11.601074 | 15.363919 |
| Mg | 15.557505 | 12.920171 | 7.619611  |
| H  | 12.502242 | 15.661567 | 9.964104  |
| H  | 12.444899 | 14.584033 | 11.376599 |
| H  | 13.837911 | 15.650995 | 11.102990 |
| H  | 12.832173 | 12.490709 | 11.019894 |
| H  | 12.801657 | 10.336835 | 11.125620 |
| H  | 13.003246 | 9.462089  | 9.591736  |
| H  | 14.340828 | 9.545874  | 10.725061 |
| H  | 16.336715 | 14.712081 | 10.398081 |
| H  | 15.964169 | 16.711335 | 11.867978 |
| H  | 17.532253 | 15.932941 | 12.152645 |
| H  | 17.447381 | 17.442840 | 11.240020 |
| H  | 18.688827 | 16.299317 | 9.242441  |
| H  | 18.804129 | 14.835004 | 10.234462 |
| H  | 18.091063 | 14.764487 | 8.608884  |
| H  | 16.967848 | 18.198957 | 9.176809  |
| H  | 15.572817 | 19.327647 | 7.477869  |
| H  | 13.700409 | 18.114054 | 6.416309  |
| H  | 12.711423 | 14.616999 | 7.338474  |
| H  | 11.590410 | 17.291512 | 6.345558  |
| H  | 10.729470 | 15.753105 | 6.460533  |
| H  | 11.269819 | 16.580206 | 7.933398  |
| H  | 14.150578 | 14.671659 | 5.289808  |
| H  | 12.422213 | 14.689112 | 4.877169  |
| H  | 13.379700 | 16.178879 | 4.787711  |
| H  | 12.970239 | 10.791467 | 7.166279  |
| H  | 11.905688 | 8.545242  | 7.511762  |
| H  | 11.190131 | 9.448025  | 6.163250  |
| H  | 12.297637 | 8.109787  | 5.842401  |
| H  | 13.829159 | 9.699829  | 4.435410  |
| H  | 12.633879 | 10.979297 | 4.718079  |
| H  | 14.344185 | 11.242135 | 5.122464  |
| H  | 14.498389 | 7.639829  | 5.830289  |
| H  | 16.584799 | 6.653579  | 6.710785  |
| H  | 17.836204 | 7.809516  | 8.499142  |
| H  | 16.695154 | 11.000195 | 10.103117 |
| H  | 18.215278 | 8.395052  | 10.652014 |
| H  | 18.107022 | 9.804252  | 11.712289 |
| H  | 16.659996 | 8.837658  | 11.369609 |

|   |           |           |           |
|---|-----------|-----------|-----------|
| H | 18.393189 | 11.388959 | 8.300153  |
| H | 19.151335 | 11.264297 | 9.902498  |
| H | 19.226100 | 9.904603  | 8.767472  |
| H | 25.052859 | 15.380991 | 11.854453 |
| H | 26.178647 | 14.140308 | 12.336571 |
| H | 23.356081 | 13.616773 | 11.240234 |
| H | 24.496216 | 12.358161 | 11.672737 |
| H | 23.399835 | 14.473184 | 13.591741 |
| H | 24.536964 | 13.206816 | 14.029509 |
| H | 22.837163 | 11.461546 | 13.402561 |
| H | 21.699684 | 12.726729 | 12.961831 |
| H | 22.870408 | 12.315268 | 15.763801 |
| H | 21.735259 | 13.579867 | 15.323741 |
| H | 21.155148 | 10.558713 | 15.170384 |
| H | 20.537647 | 11.666532 | 16.406002 |
| H | 20.011809 | 11.832609 | 14.723333 |
| H | 27.273241 | 11.754093 | 5.855843  |
| H | 28.779878 | 11.697151 | 6.754144  |
| H | 28.617689 | 12.808749 | 5.375871  |
| H | 28.255021 | 14.892758 | 5.791337  |
| H | 26.858374 | 17.847998 | 6.449929  |
| H | 28.256835 | 17.049218 | 5.699541  |
| H | 28.417219 | 17.894246 | 7.254843  |
| H | 25.032230 | 12.601612 | 6.954721  |
| H | 25.188151 | 10.567538 | 5.477987  |
| H | 23.600406 | 11.356921 | 5.415243  |
| H | 23.808011 | 9.861197  | 6.329715  |
| H | 22.909903 | 11.018075 | 8.491057  |
| H | 22.617514 | 12.455008 | 7.493314  |
| H | 23.577083 | 12.576141 | 8.983511  |
| H | 24.645676 | 9.114895  | 8.264487  |
| H | 26.302562 | 8.005829  | 9.723261  |
| H | 28.301259 | 9.245856  | 10.481644 |
| H | 29.045406 | 12.785738 | 9.498882  |
| H | 30.403322 | 10.084643 | 10.003725 |
| H | 31.200768 | 11.657935 | 9.869791  |
| H | 30.388678 | 10.950377 | 8.461272  |
| H | 28.081170 | 12.524810 | 11.792729 |
| H | 29.856581 | 12.554544 | 11.828505 |
| H | 28.985918 | 11.021584 | 12.006082 |
| H | 28.929268 | 16.432176 | 9.639655  |
| H | 29.982023 | 18.623128 | 9.030306  |
| H | 30.946869 | 17.707193 | 10.202586 |
| H | 29.987501 | 19.092687 | 10.735682 |
| H | 28.773507 | 17.562752 | 12.483506 |
| H | 29.815122 | 16.233065 | 11.944939 |
| H | 28.048433 | 16.043469 | 11.948822 |
| H | 27.849077 | 19.597755 | 11.332414 |
| H | 25.661136 | 20.678320 | 10.942206 |
| H | 24.025370 | 19.632115 | 9.415274  |
| H | 24.710894 | 16.506048 | 7.466763  |
| H | 23.118256 | 19.125272 | 7.437491  |
| H | 22.994552 | 17.791170 | 6.286539  |
| H | 24.482737 | 18.754406 | 6.374071  |
| H | 23.452615 | 15.983743 | 9.564339  |
| H | 22.356065 | 16.220109 | 8.185268  |
| H | 22.554045 | 17.494932 | 9.403380  |
| H | 18.632627 | 11.183372 | 2.895298  |
| H | 17.730371 | 12.386369 | 3.800511  |
| H | 17.853651 | 13.964805 | 1.829644  |

|   |           |           |           |
|---|-----------|-----------|-----------|
| H | 16.813582 | 11.184875 | 1.067289  |
| H | 15.911228 | 12.381265 | 1.986259  |
| H | 16.032581 | 13.968807 | 0.041594  |
| H | 16.938105 | 12.776779 | -0.878145 |
| H | 14.090502 | 12.381619 | 0.184098  |
| H | 14.995217 | 11.191778 | -0.737472 |
| H | 14.176440 | 13.973991 | -1.774502 |
| H | 13.417342 | 12.439479 | -2.226537 |
| H | 15.089048 | 12.776353 | -2.702849 |
| H | 16.596135 | 13.113715 | 6.256019  |
| H | 18.253830 | 14.716118 | 5.263582  |
| H | 18.097354 | 17.137525 | 5.665316  |
| H | 19.725377 | 18.693917 | 4.608072  |
| H | 21.517142 | 17.795035 | 3.139285  |
| H | 21.682930 | 15.367112 | 2.730502  |
| H | 18.756606 | 12.765236 | 0.919115  |

18

[hexene] scf done: -235.758330 / Energies= -235.583836 / Enthalpies= -235.582891  
/ Free Energies= -235.623758

|   |           |           |           |
|---|-----------|-----------|-----------|
| C | 21.277124 | 13.336836 | 5.541683  |
| C | 20.985690 | 13.275225 | 4.071232  |
| C | 22.047551 | 13.986662 | 3.220210  |
| C | 21.775655 | 13.896538 | 1.718092  |
| C | 22.833305 | 14.604485 | 0.873881  |
| C | 20.492300 | 13.900249 | 6.460605  |
| H | 20.763682 | 13.918784 | 7.513228  |
| H | 19.543202 | 14.362729 | 6.194081  |
| H | 22.220988 | 12.887179 | 5.857885  |
| H | 20.931358 | 12.221713 | 3.754490  |
| H | 19.997568 | 13.711596 | 3.871689  |
| H | 22.101549 | 15.041617 | 3.523370  |
| H | 23.036469 | 13.556352 | 3.437517  |
| H | 20.786686 | 14.325938 | 1.503089  |
| H | 21.717576 | 12.838933 | 1.423038  |
| H | 22.892368 | 15.670786 | 1.124612  |
| H | 22.610019 | 14.526365 | -0.196352 |
| H | 23.827670 | 14.171388 | 1.038678  |

20

[Hexane] scf done: -236.997222 / Energies= -236.798164 / Enthalpies= -236.797219  
/ Free Energies= -236.838809

|   |           |           |          |
|---|-----------|-----------|----------|
| C | 4.839661  | -3.514738 | 2.443914 |
| C | 6.083296  | -2.727327 | 2.032233 |
| C | 7.112334  | -2.534420 | 3.151929 |
| C | 7.756976  | -3.826377 | 3.658916 |
| C | 8.839421  | -3.586721 | 4.713141 |
| C | 9.481855  | -4.876147 | 5.220441 |
| H | 5.774080  | -1.738717 | 1.666165 |
| H | 5.084471  | -4.543049 | 2.732562 |
| H | 4.337104  | -3.041493 | 3.297087 |
| H | 6.566820  | -3.227445 | 1.180529 |
| H | 7.905003  | -1.863189 | 2.790582 |
| H | 6.635637  | -2.012320 | 3.995545 |
| H | 6.988814  | -4.489018 | 4.081804 |
| H | 8.194294  | -4.371651 | 2.808419 |
| H | 8.404350  | -3.036009 | 5.559489 |
| H | 9.615193  | -2.930834 | 4.292494 |
| H | 8.736075  | -5.536542 | 5.680081 |
| H | 10.253527 | -4.672427 | 5.971787 |
| H | 9.953971  | -5.432690 | 4.401232 |
| H | 4.116958  | -3.568666 | 1.621549 |

15

[PhSiH3] scf done: -522.819422 / Energies= -522.697650 / Enthalpies= -522.696705 / Free Energies= -522.734125

|    |           |           |           |
|----|-----------|-----------|-----------|
| Si | 16.079044 | 7.804851  | -2.458877 |
| C  | 17.724407 | 8.451838  | -1.836846 |
| C  | 18.065648 | 9.807240  | -1.974905 |
| C  | 19.276498 | 10.296922 | -1.488297 |
| C  | 20.172620 | 9.436473  | -0.855112 |
| C  | 19.854421 | 8.086528  | -0.712461 |
| C  | 18.642426 | 7.600610  | -1.200508 |
| H  | 15.643165 | 8.578150  | -3.652204 |
| H  | 16.201519 | 6.368521  | -2.825037 |
| H  | 15.008698 | 7.921361  | -1.430351 |
| H  | 17.381214 | 10.491520 | -2.473226 |
| H  | 19.522583 | 11.349374 | -1.606704 |
| H  | 21.118732 | 9.816360  | -0.477372 |
| H  | 20.552303 | 7.410559  | -0.224331 |
| H  | 18.413253 | 6.542503  | -1.087500 |

33

[Hexyl-phenyl-silane] scf done: -758.628462 / Energies= -758.324147 / Enthalpies= -758.323203 / Free Energies= -758.384802

|    |           |           |           |
|----|-----------|-----------|-----------|
| H  | 20.311970 | 12.278829 | 5.023428  |
| Si | 20.004590 | 12.976458 | 3.741727  |
| C  | 19.959392 | 14.828045 | 4.057799  |
| C  | 19.454049 | 15.342779 | 5.263829  |
| C  | 19.382924 | 16.716300 | 5.489258  |
| C  | 19.819576 | 17.607049 | 4.508892  |
| C  | 20.328531 | 17.118611 | 3.306416  |
| C  | 20.397937 | 15.743421 | 3.086398  |
| H  | 21.102673 | 12.690722 | 2.773701  |
| C  | 18.374868 | 12.311150 | 3.054630  |
| C  | 17.968616 | 12.883183 | 1.689271  |
| C  | 16.639682 | 12.324177 | 1.175207  |
| C  | 16.228645 | 12.878677 | -0.189839 |
| C  | 14.899907 | 12.318489 | -0.699571 |
| C  | 14.496924 | 12.872886 | -2.064613 |
| H  | 18.459117 | 11.215703 | 2.992121  |
| H  | 17.582945 | 12.508568 | 3.792251  |
| H  | 17.898848 | 13.978320 | 1.753355  |
| H  | 16.707802 | 11.227433 | 1.117997  |
| H  | 15.849866 | 12.540715 | 1.909981  |
| H  | 16.161734 | 13.975563 | -0.132965 |
| H  | 17.018876 | 12.661546 | -0.924313 |
| H  | 14.110138 | 12.537844 | 0.033154  |
| H  | 14.966505 | 11.222410 | -0.753803 |
| H  | 14.389144 | 13.964200 | -2.033208 |
| H  | 13.541890 | 12.454236 | -2.402416 |
| H  | 15.250860 | 12.638154 | -2.826253 |
| H  | 19.116882 | 14.662146 | 6.044127  |
| H  | 18.991069 | 17.092409 | 6.431362  |
| H  | 19.767629 | 18.678936 | 4.683993  |
| H  | 20.675943 | 17.808863 | 2.541308  |
| H  | 20.807165 | 15.378738 | 2.145892  |
| H  | 18.756731 | 12.671989 | 0.951676  |

2

[H2] scf done: -1.174562 / Energies= -1.162071 / Enthalpies= -1.161127 / Free Energies= -1.175919

|   |          |           |          |
|---|----------|-----------|----------|
| H | 0.671429 | 0.476999  | 1.359304 |
| H | 0.857901 | -0.239179 | 1.293596 |

148

[A1] scf done: -2879.136412 / Energies= -2877.769142 / Enthalpies= -2877.768198 /  
Free Energies= -2877.972043

|    |           |           |           |
|----|-----------|-----------|-----------|
| Mg | -3.730446 | -0.333874 | -0.007987 |
| N  | -5.278958 | -1.500333 | -0.663811 |
| C  | -4.930874 | -2.632736 | -1.467475 |
| C  | -4.634631 | -3.867721 | -0.845467 |
| C  | -4.211551 | -4.934652 | -1.643726 |
| C  | -4.078784 | -4.799804 | -3.020769 |
| C  | -4.366991 | -3.579389 | -3.620210 |
| C  | -4.793504 | -2.481619 | -2.866775 |
| N  | -4.944935 | 0.977149  | 0.988530  |
| C  | -6.271770 | 0.861409  | 1.031786  |
| C  | -7.001152 | -0.165236 | 0.400556  |
| C  | -6.557181 | -1.249506 | -0.381310 |
| C  | -7.627109 | -2.170579 | -0.924391 |
| C  | -4.725406 | -4.051092 | 0.662731  |
| C  | -5.588284 | -5.256417 | 1.061381  |
| C  | -5.058178 | -1.153624 | -3.561350 |
| C  | -6.048440 | -1.283585 | -4.727002 |
| C  | -4.296747 | 2.063249  | 1.659127  |
| C  | -3.823597 | 1.886044  | 2.979751  |
| C  | -3.112460 | 2.928422  | 3.581971  |
| C  | -2.867700 | 4.119998  | 2.909682  |
| C  | -3.333813 | 4.280952  | 1.610144  |
| C  | -4.048586 | 3.268820  | 0.962739  |
| C  | -4.037087 | 0.586946  | 3.743545  |
| C  | -4.693980 | 0.809930  | 5.112841  |
| C  | -4.501872 | 3.475444  | -0.475582 |
| C  | -5.313633 | 4.765299  | -0.660670 |
| C  | -2.714711 | -0.181491 | 3.896056  |
| C  | -3.300991 | 3.451931  | -1.434810 |
| C  | -7.077083 | 1.886761  | 1.798368  |
| C  | -3.323341 | -4.161475 | 1.282870  |
| C  | -3.743031 | -0.515066 | -4.036161 |
| C  | 1.614102  | 4.635456  | -0.140003 |
| C  | 2.572382  | 3.751872  | 0.670395  |
| C  | 1.929595  | 3.336414  | 2.003352  |
| C  | 3.922815  | 4.412395  | 0.908209  |
| C  | 5.138887  | 3.761066  | 0.596853  |
| C  | 6.378761  | 4.378024  | 0.884086  |
| C  | 6.375304  | 5.649282  | 1.465848  |
| C  | 5.186475  | 6.304502  | 1.764485  |
| C  | 3.974238  | 5.682853  | 1.489522  |
| N  | 5.114514  | 2.427747  | 0.076674  |
| Mg | 5.094834  | 0.910273  | 1.451838  |
| H  | 5.138787  | 0.892973  | 3.173858  |
| C  | 7.704452  | 3.678677  | 0.619744  |
| C  | 8.676078  | 4.537870  | -0.200918 |
| C  | 5.099516  | 2.227929  | -1.241115 |
| C  | 5.109858  | 3.424125  | -2.167075 |
| C  | 5.073816  | 0.959874  | -1.853160 |
| C  | 5.054170  | -0.326621 | -1.278502 |
| C  | 5.012661  | -1.494249 | -2.238974 |
| N  | 5.065263  | -0.564563 | 0.031996  |
| C  | 5.041858  | -1.911879 | 0.516444  |
| C  | 3.802969  | -2.537704 | 0.787859  |
| C  | 3.811070  | -3.821178 | 1.342337  |
| C  | 5.001563  | -4.479338 | 1.627835  |
| C  | 6.212645  | -3.849956 | 1.365381  |
| C  | 6.259854  | -2.567207 | 0.811548  |

|   |           |           |           |
|---|-----------|-----------|-----------|
| C | 2.475125  | -1.836713 | 0.538863  |
| C | 1.834010  | -1.403373 | 1.866989  |
| C | 7.608501  | -1.900099 | 0.581262  |
| C | 8.556472  | -2.760000 | -0.266035 |
| C | 8.265731  | -1.524987 | 1.919119  |
| C | 1.493892  | -2.687096 | -0.279690 |
| C | 8.355305  | 3.234764  | 1.939621  |
| H | -6.749013 | 1.939410  | 2.842086  |
| H | -6.931499 | 2.887663  | 1.376961  |
| H | -8.143667 | 1.652941  | 1.777920  |
| H | -8.075237 | -0.110398 | 0.535491  |
| H | -8.622763 | -1.860031 | -0.600471 |
| H | -7.605458 | -2.185824 | -2.019819 |
| H | -7.457707 | -3.201957 | -0.596834 |
| H | -4.717647 | -0.038135 | 3.154329  |
| H | -5.642115 | 1.351952  | 5.022603  |
| H | -4.898913 | -0.152279 | 5.597407  |
| H | -4.046217 | 1.384151  | 5.785553  |
| H | -1.994555 | 0.389756  | 4.494194  |
| H | -2.880123 | -1.143044 | 4.397372  |
| H | -2.246655 | -0.378116 | 2.924181  |
| H | -2.738654 | 2.801356  | 4.595236  |
| H | -2.311946 | 4.918229  | 3.395189  |
| H | -3.133552 | 5.210920  | 1.083242  |
| H | -5.155637 | 2.638047  | -0.743592 |
| H | -4.704825 | 5.658448  | -0.477295 |
| H | -5.691891 | 4.832436  | -1.687823 |
| H | -6.172481 | 4.804912  | 0.018871  |
| H | -2.727903 | 2.521646  | -1.342579 |
| H | -3.633243 | 3.548207  | -2.475877 |
| H | -2.614519 | 4.280587  | -1.222773 |
| H | -5.508427 | -0.477164 | -2.826055 |
| H | -6.992621 | -1.737993 | -4.406202 |
| H | -6.273670 | -0.295799 | -5.146684 |
| H | -5.643325 | -1.899444 | -5.538500 |
| H | -3.250660 | -1.143624 | -4.788140 |
| H | -3.929174 | 0.467015  | -4.488226 |
| H | -3.035563 | -0.383836 | -3.208716 |
| H | -4.253311 | -3.473697 | -4.696590 |
| H | -3.747119 | -5.641346 | -3.623838 |
| H | -3.976349 | -5.887966 | -1.176139 |
| H | -5.202742 | -3.157186 | 1.079443  |
| H | -5.143436 | -6.202369 | 0.730779  |
| H | -5.690402 | -5.306226 | 2.152075  |
| H | -6.593785 | -5.194409 | 0.630088  |
| H | -2.702175 | -3.292112 | 1.036616  |
| H | -3.386752 | -4.239379 | 2.375268  |
| H | -2.800299 | -5.051046 | 0.911351  |
| H | 4.094803  | -2.075941 | -2.097773 |
| H | 5.846453  | -2.180289 | -2.055418 |
| H | 5.055171  | -1.158656 | -3.277400 |
| H | 5.062465  | 0.975839  | -2.936973 |
| H | 4.240429  | 4.064536  | -1.982313 |
| H | 5.101341  | 3.117597  | -3.215227 |
| H | 5.995146  | 4.044633  | -1.990025 |
| H | 2.678183  | -0.928765 | -0.039944 |
| H | 1.935587  | -3.013603 | -1.228393 |
| H | 0.589699  | -2.109648 | -0.504392 |
| H | 1.181086  | -3.585095 | 0.266481  |
| H | 1.595997  | -2.275686 | 2.488125  |



|   |           |           |           |
|---|-----------|-----------|-----------|
| H | 0.903450  | -0.853178 | 1.684032  |
| H | 2.505788  | -0.763234 | 2.451997  |
| H | 2.865097  | -4.311497 | 1.559651  |
| H | 4.985559  | -5.477110 | 2.059539  |
| H | 7.142417  | -4.362584 | 1.601320  |
| H | 7.430419  | -0.971414 | 0.027569  |
| H | 8.835879  | -3.686459 | 0.249542  |
| H | 9.482162  | -2.210812 | -0.476619 |
| H | 8.102444  | -3.037077 | -1.224152 |
| H | 7.614676  | -0.881259 | 2.522421  |
| H | 9.212594  | -0.996468 | 1.752419  |
| H | 8.480321  | -2.420499 | 2.514852  |
| H | 7.494571  | 2.776183  | 0.034776  |
| H | 8.225890  | 4.869316  | -1.143498 |
| H | 9.579884  | 3.964907  | -0.440885 |
| H | 8.992883  | 5.432278  | 0.348486  |
| H | 8.601016  | 4.101020  | 2.565929  |
| H | 9.283795  | 2.682347  | 1.748818  |
| H | 7.686570  | 2.590955  | 2.523142  |
| H | 7.322368  | 6.132371  | 1.694845  |
| H | 5.204883  | 7.292908  | 2.217059  |
| H | 3.045766  | 6.191938  | 1.737456  |
| H | 2.743567  | 2.840099  | 0.087390  |
| H | 1.333739  | 5.542264  | 0.409210  |
| H | 0.690604  | 4.087325  | -0.360669 |
| H | 2.059090  | 4.947811  | -1.091657 |
| H | 2.585965  | 2.672022  | 2.578124  |
| H | 0.978874  | 2.817497  | 1.831962  |
| H | 1.727295  | 4.213897  | 2.629666  |
| H | -2.022033 | -0.417108 | -0.223862 |

166

[A2] scf done: -3114.888923 / Energies= -3113.343999 / Enthalpies= -3113.343054 /  
Free Energies= -3113.569419

|    |           |           |           |
|----|-----------|-----------|-----------|
| Mg | -4.792067 | -0.223346 | -1.336274 |
| N  | -6.306413 | -1.613014 | -1.014931 |
| C  | -6.279348 | -2.850474 | -1.726760 |
| C  | -5.746229 | -3.998314 | -1.085936 |
| C  | -5.668474 | -5.194050 | -1.805323 |
| C  | -6.085843 | -5.269637 | -3.130125 |
| C  | -6.593844 | -4.136020 | -3.752299 |
| C  | -6.705724 | -2.916037 | -3.075001 |
| N  | -5.238496 | 0.855093  | 0.393628  |
| C  | -6.491079 | 0.849330  | 0.844925  |
| C  | -7.472738 | -0.090947 | 0.471657  |
| C  | -7.389357 | -1.243969 | -0.333938 |
| C  | -8.667152 | -2.054459 | -0.428611 |
| C  | -5.297858 | -3.957964 | 0.369208  |
| C  | -6.398441 | -4.471064 | 1.312174  |
| C  | -7.295225 | -1.718636 | -3.808751 |
| C  | -8.726972 | -1.999556 | -4.292147 |
| C  | -4.277391 | 1.764928  | 0.931091  |
| C  | -3.491263 | 1.360467  | 2.042298  |
| C  | -2.515594 | 2.236249  | 2.528027  |
| C  | -2.294789 | 3.475215  | 1.936345  |
| C  | -3.058625 | 3.853539  | 0.839811  |
| C  | -4.056157 | 3.021784  | 0.319105  |
| C  | -3.705622 | 0.015822  | 2.726778  |
| C  | -4.602616 | 0.148640  | 3.968563  |
| C  | -4.874885 | 3.514751  | -0.866168 |
| C  | -5.664884 | 4.785241  | -0.513388 |

|    |           |           |           |
|----|-----------|-----------|-----------|
| C  | -2.393389 | -0.679724 | 3.115774  |
| C  | -4.001567 | 3.754788  | -2.105877 |
| C  | -6.972555 | 1.933107  | 1.790489  |
| C  | -3.999540 | -4.735053 | 0.623385  |
| C  | -6.413604 | -1.276600 | -4.985865 |
| C  | -2.379085 | -1.174164 | -0.524149 |
| C  | -1.981991 | -1.327035 | -1.797825 |
| C  | -1.724155 | -2.631358 | -2.485286 |
| C  | -2.436196 | -2.775503 | -3.836853 |
| C  | -2.057164 | -4.066170 | -4.564100 |
| C  | -2.752578 | -4.212791 | -5.915460 |
| C  | 2.320410  | 4.807305  | 0.275397  |
| C  | 3.292816  | 3.927289  | 1.072794  |
| C  | 2.651471  | 3.470022  | 2.392788  |
| C  | 4.628056  | 4.609790  | 1.333423  |
| C  | 5.859116  | 3.985342  | 1.025858  |
| C  | 7.084483  | 4.620747  | 1.333477  |
| C  | 7.051589  | 5.883697  | 1.932198  |
| C  | 5.848043  | 6.512756  | 2.227677  |
| C  | 4.650118  | 5.872969  | 1.932156  |
| N  | 5.865608  | 2.658700  | 0.487276  |
| Mg | 5.881184  | 1.123932  | 1.841755  |
| H  | 5.886502  | 1.070544  | 3.563095  |
| C  | 8.425778  | 3.950720  | 1.071649  |
| C  | 9.384142  | 4.836674  | 0.263871  |
| C  | 5.859967  | 2.476788  | -0.832799 |
| C  | 5.846949  | 3.684913  | -1.742807 |
| C  | 5.865364  | 1.216049  | -1.461740 |
| C  | 5.879985  | -0.077609 | -0.904760 |
| C  | 5.887352  | -1.232799 | -1.881191 |
| N  | 5.890113  | -0.333486 | 0.403055  |
| C  | 5.906459  | -1.686981 | 0.869126  |
| C  | 4.686542  | -2.338983 | 1.163643  |
| C  | 4.729695  | -3.629043 | 1.700541  |
| C  | 5.938163  | -4.269641 | 1.947402  |
| C  | 7.130961  | -3.615048 | 1.663468  |
| C  | 7.142453  | -2.324612 | 1.125760  |
| C  | 3.341037  | -1.658976 | 0.954363  |
| C  | 2.706214  | -1.285219 | 2.303348  |
| C  | 8.472722  | -1.627870 | 0.877513  |
| C  | 9.434786  | -2.469887 | 0.028273  |
| C  | 9.131711  | -1.229468 | 2.207866  |
| C  | 2.372906  | -2.505486 | 0.116448  |
| C  | 9.078026  | 3.509083  | 2.391616  |
| H  | -2.463418 | -5.144775 | -6.414693 |
| H  | -6.157273 | 2.384294  | 2.358812  |
| H  | -7.449136 | 2.732078  | 1.208350  |
| H  | -7.722356 | 1.544478  | 2.485302  |
| H  | -8.447885 | 0.076676  | 0.917982  |
| H  | -9.248069 | -1.979980 | 0.494594  |
| H  | -9.289159 | -1.659796 | -1.241769 |
| H  | -8.476201 | -3.106870 | -0.647693 |
| H  | -4.230733 | -0.630073 | 2.012742  |
| H  | -5.590493 | 0.544909  | 3.717998  |
| H  | -4.744519 | -0.828695 | 4.446484  |
| H  | -4.147127 | 0.821324  | 4.705900  |
| H  | -1.887231 | -0.166615 | 3.942045  |
| H  | -2.598026 | -1.702683 | 3.453744  |
| H  | -1.690706 | -0.732041 | 2.277530  |
| H  | -1.916131 | 1.943419  | 3.386159  |

|   |           |           |           |
|---|-----------|-----------|-----------|
| H | -1.531318 | 4.141604  | 2.330062  |
| H | -2.884977 | 4.822930  | 0.378190  |
| H | -5.598905 | 2.733610  | -1.124200 |
| H | -4.993866 | 5.628855  | -0.310783 |
| H | -6.314945 | 5.073642  | -1.348222 |
| H | -6.291425 | 4.642831  | 0.373575  |
| H | -3.507453 | 2.831575  | -2.423457 |
| H | -4.619724 | 4.103940  | -2.941929 |
| H | -3.235529 | 4.516741  | -1.915373 |
| H | -7.339239 | -0.881535 | -3.103093 |
| H | -9.375924 | -2.337324 | -3.476994 |
| H | -9.166332 | -1.093157 | -4.725761 |
| H | -8.741701 | -2.774951 | -5.067538 |
| H | -6.306677 | -2.078382 | -5.727120 |
| H | -6.863132 | -0.412841 | -5.490989 |
| H | -5.417463 | -0.979139 | -4.644387 |
| H | -6.922802 | -4.197974 | -4.787243 |
| H | -6.017379 | -6.209065 | -3.673195 |
| H | -5.275119 | -6.083820 | -1.320314 |
| H | -5.115628 | -2.906253 | 0.620599  |
| H | -6.654253 | -5.512213 | 1.079225  |
| H | -6.061526 | -4.431665 | 2.355521  |
| H | -7.312357 | -3.875479 | 1.233426  |
| H | -3.206780 | -4.443957 | -0.073924 |
| H | -3.642770 | -4.548618 | 1.643425  |
| H | -4.142843 | -5.817904 | 0.527550  |
| H | 5.033545  | -1.896073 | -1.705379 |
| H | 6.786825  | -1.844508 | -1.749831 |
| H | 5.852143  | -0.882206 | -2.914910 |
| H | 5.858586  | 1.246484  | -2.545259 |
| H | 4.964141  | 4.304900  | -1.552029 |
| H | 5.847441  | 3.392550  | -2.794975 |
| H | 6.718796  | 4.321119  | -1.555150 |
| H | 3.519352  | -0.728911 | 0.403135  |
| H | 2.809933  | -2.779925 | -0.850452 |
| H | 1.448658  | -1.947083 | -0.074659 |
| H | 2.094405  | -3.433258 | 0.630175  |
| H | 2.490027  | -2.182169 | 2.896327  |
| H | 1.763508  | -0.745037 | 2.152648  |
| H | 3.372461  | -0.652912 | 2.902305  |
| H | 3.798399  | -4.138848 | 1.936303  |
| H | 5.950514  | -5.272816 | 2.366241  |
| H | 8.074978  | -4.113990 | 1.869865  |
| H | 8.268353  | -0.706559 | 0.320616  |
| H | 9.747370  | -3.381927 | 0.550245  |
| H | 10.341669 | -1.896679 | -0.198858 |
| H | 8.978435  | -2.770925 | -0.921498 |
| H | 8.470638  | -0.598762 | 2.814161  |
| H | 10.064001 | -0.679054 | 2.030752  |
| H | 9.372231  | -2.116565 | 2.806219  |
| H | 8.238094  | 3.049279  | 0.477464  |
| H | 8.931907  | 5.167880  | -0.677765 |
| H | 10.300236 | 4.283991  | 0.023142  |
| H | 9.680486  | 5.732045  | 0.823013  |
| H | 9.301512  | 4.374659  | 3.026994  |
| H | 10.019182 | 2.978358  | 2.201787  |
| H | 8.419881  | 2.846162  | 2.965869  |
| H | 7.987126  | 6.381057  | 2.177139  |
| H | 5.843646  | 7.495051  | 2.693522  |
| H | 3.710305  | 6.362225  | 2.176968  |

|   |           |           |           |
|---|-----------|-----------|-----------|
| H | 3.486956  | 3.031398  | 0.472389  |
| H | 2.017925  | 5.696445  | 0.841326  |
| H | 1.409162  | 4.246018  | 0.036731  |
| H | 2.763630  | 5.149220  | -0.666735 |
| H | 3.318895  | 2.809709  | 2.959417  |
| H | 1.714758  | 2.931666  | 2.203021  |
| H | 2.423562  | 4.329289  | 3.035368  |
| H | -1.805755 | -0.432906 | -2.397116 |
| H | -0.637514 | -2.704364 | -2.654605 |
| H | -3.522346 | -2.746875 | -3.680927 |
| H | -2.193723 | -1.910210 | -4.470035 |
| H | -0.966711 | -4.097706 | -4.704878 |
| H | -2.310100 | -4.925970 | -3.927937 |
| H | -2.497361 | -3.382385 | -6.585223 |
| H | -3.842081 | -4.220124 | -5.795250 |
| H | -4.347025 | 0.475484  | -2.866391 |
| H | -1.991658 | -3.465864 | -1.825059 |
| H | -2.441051 | -0.186334 | -0.065926 |
| H | -2.556770 | -2.028134 | 0.126476  |

166

[TS-A2A3] scf done: -3114.870769 / Energies= -3113.327045 / Enthalpies= -3113.326101 / Free Energies=-3113.547348

|    |           |           |           |
|----|-----------|-----------|-----------|
| Mg | 15.845201 | 12.966027 | 6.912874  |
| N  | 14.301959 | 11.606120 | 7.100031  |
| C  | 14.458243 | 10.332937 | 6.471837  |
| C  | 15.158897 | 9.310352  | 7.160468  |
| C  | 15.362370 | 8.086958  | 6.515049  |
| C  | 14.907798 | 7.867807  | 5.219236  |
| C  | 14.237734 | 8.882722  | 4.548305  |
| C  | 13.997086 | 10.122439 | 5.150474  |
| N  | 15.017535 | 14.358658 | 8.189705  |
| C  | 13.756392 | 14.258828 | 8.602746  |
| C  | 12.910640 | 13.162115 | 8.342602  |
| C  | 13.154684 | 11.937834 | 7.687326  |
| C  | 11.979692 | 10.981254 | 7.648214  |
| C  | 15.654745 | 9.512979  | 8.586303  |
| C  | 14.607680 | 9.058172  | 9.615818  |
| C  | 13.272259 | 11.200042 | 4.355139  |
| C  | 11.930707 | 10.707424 | 3.791711  |
| C  | 15.827857 | 15.469421 | 8.578259  |
| C  | 16.493576 | 15.461850 | 9.829436  |
| C  | 17.363132 | 16.514501 | 10.131977 |
| C  | 17.574973 | 17.560680 | 9.241632  |
| C  | 16.905821 | 17.566100 | 8.023773  |
| C  | 16.030390 | 16.535296 | 7.666824  |
| C  | 16.295523 | 14.353946 | 10.856406 |
| C  | 15.819519 | 14.904472 | 12.210223 |
| C  | 15.288508 | 16.620676 | 6.339231  |
| C  | 14.230164 | 17.735428 | 6.368820  |
| C  | 17.571060 | 13.521095 | 11.051776 |
| C  | 16.232452 | 16.814455 | 5.145446  |
| C  | 13.150540 | 15.361727 | 9.445404  |
| C  | 16.996253 | 8.825265  | 8.867751  |
| C  | 14.159049 | 11.744882 | 3.226037  |
| C  | 18.032361 | 12.375100 | 7.144502  |
| C  | 18.056427 | 12.912217 | 5.852907  |
| C  | 18.324286 | 12.064685 | 4.628026  |
| C  | 18.249456 | 12.797148 | 3.290287  |
| C  | 18.584639 | 11.900923 | 2.097527  |
| C  | 18.522264 | 12.637747 | 0.761249  |

|    |           |           |           |
|----|-----------|-----------|-----------|
| C  | 22.114824 | 18.003704 | 7.882605  |
| C  | 23.082251 | 17.123067 | 8.685466  |
| C  | 22.446167 | 16.694641 | 10.017607 |
| C  | 24.427872 | 17.793118 | 8.924635  |
| C  | 25.648858 | 17.153062 | 8.609268  |
| C  | 26.884011 | 17.778827 | 8.897618  |
| C  | 26.870756 | 19.047425 | 9.485005  |
| C  | 25.677051 | 19.691527 | 9.788023  |
| C  | 24.469592 | 19.061344 | 9.511567  |
| N  | 25.635821 | 15.821346 | 8.083831  |
| Mg | 25.645131 | 14.299660 | 9.453793  |
| H  | 25.664894 | 14.270058 | 11.175663 |
| C  | 28.215378 | 17.092190 | 8.628306  |
| C  | 29.176556 | 17.962064 | 7.806574  |
| C  | 25.618753 | 15.626241 | 6.765586  |
| C  | 25.610830 | 16.825573 | 5.843818  |
| C  | 25.608310 | 14.359616 | 6.149207  |
| C  | 25.617507 | 13.071251 | 6.719262  |
| C  | 25.603119 | 11.906088 | 5.754878  |
| N  | 25.637374 | 12.828832 | 8.029222  |
| C  | 25.647851 | 11.479650 | 8.508574  |
| C  | 24.425374 | 10.831658 | 8.801242  |
| C  | 24.464520 | 9.546494  | 9.350114  |
| C  | 25.670915 | 8.907062  | 9.609995  |
| C  | 26.866031 | 9.557852  | 9.327386  |
| C  | 26.881776 | 10.843484 | 8.778324  |
| C  | 23.081548 | 11.510680 | 8.578326  |
| C  | 22.448081 | 11.910978 | 9.920379  |
| C  | 28.214532 | 11.535244 | 8.529311  |
| C  | 29.170592 | 10.690028 | 7.676396  |
| C  | 28.878199 | 11.928913 | 9.858696  |
| C  | 22.110177 | 10.651767 | 7.756878  |
| C  | 28.874133 | 16.651965 | 9.945524  |
| H  | 18.760718 | 11.971502 | -0.075802 |
| H  | 13.530957 | 16.345688 | 9.160193  |
| H  | 12.060812 | 15.361640 | 9.360994  |
| H  | 13.401446 | 15.213235 | 10.502284 |
| H  | 11.908880 | 13.262088 | 8.746747  |
| H  | 11.306601 | 11.155458 | 8.491632  |
| H  | 11.403784 | 11.134944 | 6.727569  |
| H  | 12.299787 | 9.936722  | 7.656482  |
| H  | 15.520145 | 13.679363 | 10.478314 |
| H  | 14.930605 | 15.535777 | 12.105759 |
| H  | 15.574323 | 14.081230 | 12.891980 |
| H  | 16.596013 | 15.509375 | 12.693367 |
| H  | 18.398720 | 14.140557 | 11.418012 |
| H  | 17.401107 | 12.724117 | 11.786319 |
| H  | 17.890900 | 13.053232 | 10.116001 |
| H  | 17.882232 | 16.515316 | 11.087811 |
| H  | 18.252355 | 18.371025 | 9.499262  |
| H  | 17.060069 | 18.393241 | 7.334758  |
| H  | 14.762800 | 15.671223 | 6.188060  |
| H  | 14.695332 | 18.718107 | 6.514897  |
| H  | 13.676416 | 17.764090 | 5.422362  |
| H  | 13.506233 | 17.587520 | 7.177288  |
| H  | 16.962279 | 16.001601 | 5.082129  |
| H  | 15.659905 | 16.820939 | 4.210242  |
| H  | 16.777389 | 17.764362 | 5.204891  |
| H  | 13.062691 | 12.035607 | 5.031431  |
| H  | 11.292255 | 10.278784 | 4.572064  |

|   |           |           |           |
|---|-----------|-----------|-----------|
| H | 11.387756 | 11.537986 | 3.324959  |
| H | 12.071996 | 9.937985  | 3.023372  |
| H | 14.434434 | 10.950126 | 2.521709  |
| H | 13.630093 | 12.524756 | 2.663783  |
| H | 15.078212 | 12.184046 | 3.628218  |
| H | 13.891730 | 8.710952  | 3.531703  |
| H | 15.078906 | 6.909881  | 4.734178  |
| H | 15.888938 | 7.290258  | 7.033398  |
| H | 15.799518 | 10.590936 | 8.729418  |
| H | 14.379384 | 7.992204  | 9.492558  |
| H | 14.981227 | 9.208097  | 10.636408 |
| H | 13.672732 | 9.617592  | 9.517076  |
| H | 17.745110 | 9.062610  | 8.104361  |
| H | 17.386236 | 9.150728  | 9.839131  |
| H | 16.897254 | 7.733984  | 8.911439  |
| H | 24.723315 | 11.275284 | 5.923039  |
| H | 26.477886 | 11.264688 | 5.907828  |
| H | 25.595789 | 12.246510 | 4.717194  |
| H | 25.592984 | 14.379228 | 5.065502  |
| H | 24.737545 | 17.458064 | 6.037272  |
| H | 25.597550 | 16.522878 | 4.794628  |
| H | 26.492095 | 17.453000 | 6.016588  |
| H | 23.261800 | 12.430413 | 8.010527  |
| H | 22.549659 | 10.349248 | 6.799392  |
| H | 21.190991 | 11.211830 | 7.547515  |
| H | 21.822260 | 9.739054  | 8.292132  |
| H | 22.232755 | 11.025428 | 10.530604 |
| H | 21.505122 | 12.447457 | 9.759503  |
| H | 23.114666 | 12.554709 | 10.506896 |
| H | 23.531341 | 9.039547  | 9.584210  |
| H | 25.679698 | 7.907558  | 10.037671 |
| H | 27.808415 | 9.059852  | 9.543484  |
| H | 28.012917 | 12.458040 | 7.973814  |
| H | 29.476634 | 9.773712  | 8.194806  |
| H | 30.081396 | 11.257743 | 7.450938  |
| H | 28.711569 | 10.396073 | 6.725716  |
| H | 28.221020 | 12.561702 | 10.467002 |
| H | 29.812415 | 12.475619 | 9.680115  |
| H | 29.116655 | 11.040159 | 10.455422 |
| H | 28.012489 | 16.188953 | 8.041939  |
| H | 28.720289 | 18.291610 | 6.866289  |
| H | 30.084662 | 17.397843 | 7.562336  |
| H | 29.487059 | 18.857987 | 8.357056  |
| H | 29.113627 | 17.519249 | 10.572729 |
| H | 29.807128 | 16.108590 | 9.751139  |
| H | 28.213287 | 16.001065 | 10.530299 |
| H | 27.814044 | 19.537272 | 9.715041  |
| H | 25.687855 | 20.677926 | 10.245050 |
| H | 23.537563 | 19.562163 | 9.762781  |
| H | 23.260200 | 16.215875 | 8.097130  |
| H | 21.835124 | 18.908899 | 8.434675  |
| H | 21.190727 | 17.454216 | 7.667086  |
| H | 22.552255 | 18.319563 | 6.928678  |
| H | 23.108484 | 16.031410 | 10.586759 |
| H | 21.498720 | 16.169911 | 9.844438  |
| H | 22.238684 | 17.566515 | 10.649977 |
| H | 18.376064 | 13.950655 | 5.761959  |
| H | 19.344178 | 11.669315 | 4.761828  |
| H | 17.245434 | 13.222075 | 3.166363  |
| H | 18.944887 | 13.650281 | 3.307475  |

|   |           |           |          |
|---|-----------|-----------|----------|
| H | 19.587824 | 11.470814 | 2.231982 |
| H | 17.889303 | 11.049528 | 2.078651 |
| H | 19.233402 | 13.472828 | 0.734814 |
| H | 17.521704 | 13.050955 | 0.584191 |
| H | 16.450926 | 13.453825 | 5.257718 |
| H | 17.662912 | 11.188893 | 4.627249 |
| H | 18.363141 | 12.989639 | 7.978547 |
| H | 18.051649 | 11.295409 | 7.280899 |

166

[A3] scf done: -3114.932955 / Energies= -3113.383419 / Enthalpies= -3113.382475 /  
Free Energies= -3113.608059

|    |           |           |           |
|----|-----------|-----------|-----------|
| Mg | -4.621925 | -0.627571 | -0.319000 |
| N  | -6.118344 | -2.029243 | -0.127303 |
| C  | -5.851113 | -3.317565 | -0.690210 |
| C  | -5.202370 | -4.302110 | 0.091145  |
| C  | -4.862472 | -5.517581 | -0.510081 |
| C  | -5.150304 | -5.769601 | -1.846428 |
| C  | -5.788114 | -4.794807 | -2.604710 |
| C  | -6.148179 | -3.562522 | -2.050942 |
| N  | -5.701606 | 0.836328  | 0.646205  |
| C  | -6.917034 | 0.640567  | 1.158120  |
| C  | -7.633016 | -0.568760 | 1.074359  |
| C  | -7.279541 | -1.796709 | 0.481182  |
| C  | -8.308211 | -2.903156 | 0.560662  |
| C  | -4.837756 | -4.059213 | 1.548764  |
| C  | -5.357197 | -5.163950 | 2.479488  |
| C  | -6.813396 | -2.512032 | -2.928902 |
| C  | -8.060096 | -3.045970 | -3.647734 |
| C  | -5.071992 | 2.116227  | 0.769293  |
| C  | -4.179790 | 2.357072  | 1.840413  |
| C  | -3.492897 | 3.574385  | 1.880870  |
| C  | -3.674286 | 4.540575  | 0.898537  |
| C  | -4.559615 | 4.296932  | -0.145015 |
| C  | -5.270455 | 3.096253  | -0.232176 |
| C  | -3.936919 | 1.327011  | 2.934557  |
| C  | -4.204111 | 1.891623  | 4.337369  |
| C  | -6.212123 | 2.870457  | -1.407049 |
| C  | -7.256578 | 3.987524  | -1.546622 |
| C  | -2.516010 | 0.749048  | 2.847948  |
| C  | -5.431047 | 2.702804  | -2.719309 |
| C  | -7.603465 | 1.776649  | 1.884157  |
| C  | -3.319400 | -3.885941 | 1.712087  |
| C  | -5.813265 | -1.932331 | -3.941620 |
| C  | -2.689894 | -0.844182 | -1.172229 |
| C  | -2.188278 | 0.195583  | -2.185294 |
| C  | -0.783713 | -0.080644 | -2.737889 |
| C  | -0.299103 | 0.952971  | -3.755891 |
| C  | 1.098106  | 0.667161  | -4.309536 |
| C  | 1.566859  | 1.703143  | -5.329616 |
| C  | 1.947850  | 4.126280  | -0.071690 |
| C  | 2.923748  | 3.240388  | 0.714866  |
| C  | 2.309008  | 2.818079  | 2.058869  |
| C  | 4.278151  | 3.900939  | 0.928541  |
| C  | 5.488383  | 3.245284  | 0.603378  |
| C  | 6.733158  | 3.863649  | 0.864295  |
| C  | 6.740369  | 5.139377  | 1.436436  |
| C  | 5.557345  | 5.797509  | 1.750755  |
| C  | 4.340059  | 5.175276  | 1.499897  |
| N  | 5.455021  | 1.906302  | 0.097822  |
| Mg | 5.478791  | 0.404900  | 1.489709  |

|   |           |           |           |
|---|-----------|-----------|-----------|
| H | 5.530945  | 0.403521  | 3.211446  |
| C | 8.054017  | 3.162967  | 0.580170  |
| C | 9.003648  | 4.012972  | -0.275109 |
| C | 5.403761  | 1.691175  | -1.216521 |
| C | 5.383008  | 2.876235  | -2.156219 |
| C | 5.368057  | 0.415320  | -1.812696 |
| C | 5.384829  | -0.864658 | -1.223619 |
| C | 5.338087  | -2.043603 | -2.169880 |
| N | 5.436639  | -1.087568 | 0.089033  |
| C | 5.453166  | -2.429350 | 0.588674  |
| C | 4.234983  | -3.076153 | 0.901554  |
| C | 4.282335  | -4.352548 | 1.469741  |
| C | 5.492589  | -4.985195 | 1.728621  |
| C | 6.683381  | -4.336050 | 1.425281  |
| C | 6.690892  | -3.058620 | 0.856988  |
| C | 2.887653  | -2.404411 | 0.678613  |
| C | 2.272258  | -1.967854 | 2.017791  |
| C | 8.019910  | -2.369449 | 0.582538  |
| C | 8.959857  | -3.221094 | -0.281830 |
| C | 8.706475  | -1.968521 | 1.898010  |
| C | 1.905720  | -3.285778 | -0.105614 |
| C | 8.736563  | 2.739615  | 1.890755  |
| H | 2.568257  | 1.470415  | -5.711074 |
| H | -7.762475 | 2.628471  | 1.213942  |
| H | -8.570369 | 1.466276  | 2.286080  |
| H | -6.981808 | 2.142160  | 2.708641  |
| H | -8.611841 | -0.552031 | 1.539691  |
| H | -9.211828 | -2.571552 | 1.076720  |
| H | -8.584590 | -3.248693 | -0.441566 |
| H | -7.904103 | -3.774041 | 1.088373  |
| H | -4.640948 | 0.502327  | 2.776279  |
| H | -5.216079 | 2.303371  | 4.421664  |
| H | -4.095560 | 1.103514  | 5.092107  |
| H | -3.498833 | 2.690986  | 4.593508  |
| H | -1.762551 | 1.528017  | 3.016055  |
| H | -2.366915 | -0.029586 | 3.606097  |
| H | -2.319878 | 0.309647  | 1.863174  |
| H | -2.801240 | 3.767310  | 2.697759  |
| H | -3.129367 | 5.480070  | 0.946597  |
| H | -4.699961 | 5.054807  | -0.912341 |
| H | -6.754623 | 1.936272  | -1.224905 |
| H | -6.791745 | 4.948382  | -1.796981 |
| H | -7.964442 | 3.746775  | -2.348800 |
| H | -7.828244 | 4.127790  | -0.622401 |
| H | -4.701347 | 1.888195  | -2.655115 |
| H | -6.113282 | 2.486972  | -3.550877 |
| H | -4.877277 | 3.616134  | -2.968316 |
| H | -7.138057 | -1.692263 | -2.278502 |
| H | -8.785004 | -3.466683 | -2.941778 |
| H | -8.555229 | -2.238622 | -4.200596 |
| H | -7.807253 | -3.830327 | -4.370689 |
| H | -5.457970 | -2.708004 | -4.630761 |
| H | -6.280296 | -1.139418 | -4.538752 |
| H | -4.932125 | -1.512104 | -3.442665 |
| H | -6.008671 | -4.992513 | -3.651190 |
| H | -4.876635 | -6.721063 | -2.295563 |
| H | -4.358738 | -6.279921 | 0.079785  |
| H | -5.312550 | -3.121843 | 1.859085  |
| H | -4.875458 | -6.127444 | 2.275659  |
| H | -5.148781 | -4.908736 | 3.525451  |



|   |           |           |           |
|---|-----------|-----------|-----------|
| H | -6.438785 | -5.305745 | 2.374971  |
| H | -2.935488 | -3.076064 | 1.080938  |
| H | -3.064300 | -3.658974 | 2.754646  |
| H | -2.786908 | -4.801505 | 1.427168  |
| H | 4.443807  | -2.650011 | -1.987881 |
| H | 6.198166  | -2.703254 | -2.012199 |
| H | 5.331148  | -1.718663 | -3.212429 |
| H | 5.325030  | 0.418612  | -2.895719 |
| H | 4.519031  | 3.518251  | -1.952629 |
| H | 5.342518  | 2.557659  | -3.199889 |
| H | 6.272829  | 3.499176  | -2.013366 |
| H | 3.059133  | -1.500333 | 0.083834  |
| H | 2.336379  | -3.625548 | -1.054359 |
| H | 0.990295  | -2.726765 | -0.331598 |
| H | 1.613296  | -4.176206 | 0.463643  |
| H | 2.067037  | -2.836691 | 2.655019  |
| H | 1.326356  | -1.436830 | 1.855358  |
| H | 2.945722  | -1.307404 | 2.577277  |
| H | 3.352525  | -4.858162 | 1.719304  |
| H | 5.507624  | -5.978180 | 2.171106  |
| H | 7.629055  | -4.828731 | 1.639318  |
| H | 7.809568  | -1.449974 | 0.024722  |
| H | 9.270758  | -4.136315 | 0.235695  |
| H | 9.868767  | -2.657306 | -0.524287 |
| H | 8.484520  | -3.517252 | -1.223727 |
| H | 8.059876  | -1.332056 | 2.513751  |
| H | 9.637487  | -1.422967 | 1.700119  |
| H | 8.955620  | -2.853729 | 2.495714  |
| H | 7.832863  | 2.251881  | 0.012834  |
| H | 8.531333  | 4.326730  | -1.212841 |
| H | 9.904913  | 3.440454  | -0.525405 |
| H | 9.327209  | 4.917724  | 0.252906  |
| H | 8.996446  | 3.615312  | 2.497875  |
| H | 9.660850  | 2.185101  | 1.686357  |
| H | 8.082788  | 2.104325  | 2.500104  |
| H | 7.691619  | 5.623610  | 1.644799  |
| H | 5.583998  | 6.789044  | 2.195912  |
| H | 3.416401  | 5.687476  | 1.758913  |
| H | 3.084685  | 2.331217  | 0.124995  |
| H | 1.674439  | 5.028581  | 0.488194  |
| H | 1.021575  | 3.578061  | -0.280507 |
| H | 2.374440  | 4.446593  | -1.028963 |
| H | 2.978825  | 2.155410  | 2.619878  |
| H | 1.358233  | 2.293780  | 1.902837  |
| H | 2.113536  | 3.692718  | 2.691256  |
| H | -2.191943 | 1.200127  | -1.734176 |
| H | -0.073911 | -0.127006 | -1.897539 |
| H | -1.014026 | 1.002566  | -4.591810 |
| H | -0.306927 | 1.951943  | -3.293243 |
| H | 1.815739  | 0.620824  | -3.477603 |
| H | 1.105437  | -0.330761 | -4.771411 |
| H | 1.603909  | 2.706474  | -4.886945 |
| H | 0.886886  | 1.748814  | -6.189532 |
| H | -2.882188 | 0.256206  | -3.039506 |
| H | -0.773109 | -1.080603 | -3.198095 |
| H | -1.951391 | -0.914848 | -0.353942 |
| H | -2.668259 | -1.840392 | -1.647603 |

184

[C1] scf done: -3350.685391 / Energies= -3348.956282 / Enthalpies= -3348.955337 /  
Free Energies= -3349.187176

|    |           |           |           |
|----|-----------|-----------|-----------|
| C  | -2.009335 | -2.781310 | 2.892860  |
| C  | -2.342128 | -1.406046 | 2.852783  |
| C  | -3.695401 | -0.997524 | 2.774601  |
| C  | -4.692584 | -1.977817 | 2.751106  |
| C  | -4.376616 | -3.330746 | 2.783479  |
| C  | -3.043794 | -3.720755 | 2.841605  |
| N  | -1.313424 | -0.410194 | 2.945343  |
| C  | -0.884651 | -0.136632 | 4.179759  |
| C  | -1.404619 | -0.928577 | 5.366182  |
| C  | -4.095183 | 0.471781  | 2.785771  |
| C  | -5.120432 | 0.814050  | 1.697394  |
| C  | -0.569987 | -3.263621 | 3.012553  |
| C  | -0.032151 | -3.732753 | 1.657618  |
| C  | 0.040508  | 0.867899  | 4.513231  |
| C  | 0.539037  | 1.937683  | 3.751601  |
| C  | 1.333854  | 2.961082  | 4.541105  |
| N  | 0.345934  | 2.104488  | 2.440216  |
| C  | 0.748461  | 3.377297  | 1.913116  |
| C  | 2.082691  | 3.590892  | 1.494075  |
| C  | 2.436782  | 4.852986  | 1.006095  |
| C  | 1.522286  | 5.898820  | 0.969128  |
| C  | 0.220959  | 5.685564  | 1.407978  |
| C  | -0.194596 | 4.433939  | 1.873745  |
| C  | 3.144949  | 2.506458  | 1.603580  |
| C  | 3.452247  | 1.880244  | 0.240773  |
| C  | -1.622377 | 4.270373  | 2.380522  |
| C  | -2.665633 | 4.688007  | 1.335795  |
| C  | 4.444409  | 3.012041  | 2.249667  |
| C  | -1.849635 | 5.044813  | 3.688903  |
| C  | -4.623761 | 0.901662  | 4.163482  |
| C  | -0.396979 | -4.376268 | 4.057841  |
| Mg | -0.426644 | 0.524021  | 1.244974  |
| C  | 3.927060  | -0.805516 | 4.613698  |
| C  | 4.393086  | -1.584939 | 3.636235  |
| C  | 5.786863  | -2.134273 | 3.553071  |
| C  | 5.825125  | -3.669319 | 3.570522  |
| C  | 7.237556  | -4.239845 | 3.434338  |
| C  | 7.271496  | -5.766562 | 3.453722  |
| C  | -1.687946 | 1.275961  | -0.567629 |
| C  | -2.692889 | 1.056911  | -1.726111 |
| C  | -3.700490 | 2.195453  | -1.931900 |
| C  | -4.699924 | 1.940701  | -3.061757 |
| C  | -5.700470 | 3.080279  | -3.262065 |
| C  | -6.697857 | 2.816944  | -4.388506 |
| Mg | -0.150360 | -0.127328 | -1.579645 |
| N  | 0.723371  | 0.837138  | -3.290976 |
| C  | 0.278098  | 0.493951  | -4.498913 |
| C  | -0.563042 | -0.599919 | -4.782279 |
| C  | -0.862555 | -1.741808 | -4.019575 |
| N  | -0.680368 | -1.857973 | -2.701044 |
| C  | -0.854570 | -3.177121 | -2.158758 |
| C  | -2.145204 | -3.674916 | -1.854255 |
| C  | -2.267648 | -4.984363 | -1.378557 |
| C  | -1.159594 | -5.807926 | -1.221881 |
| C  | 0.102809  | -5.310205 | -1.518100 |
| C  | 0.282261  | -4.001217 | -1.976836 |
| C  | -3.405891 | -2.840407 | -2.030668 |
| C  | -3.938078 | -2.374566 | -0.671658 |
| C  | 1.691820  | -3.532918 | -2.308649 |
| C  | 2.639434  | -3.673838 | -1.109739 |

|   |           |           |           |
|---|-----------|-----------|-----------|
| C | 1.758067  | 1.833705  | -3.247146 |
| C | 1.429982  | 3.205894  | -3.129044 |
| C | 2.466470  | 4.144907  | -3.095375 |
| C | 3.798607  | 3.762214  | -3.190115 |
| C | 4.109253  | 2.415259  | -3.328753 |
| C | 3.112006  | 1.435516  | -3.366244 |
| C | -0.006792 | 3.708323  | -3.109679 |
| C | -0.275227 | 4.626497  | -1.914030 |
| C | 3.526388  | -0.012312 | -3.590211 |
| C | 4.402377  | -0.542884 | -2.447613 |
| C | 0.724107  | 1.230213  | -5.751936 |
| C | 4.250064  | -0.189135 | -4.934926 |
| C | -0.374161 | 4.444037  | -4.409826 |
| C | -1.385160 | -2.917457 | -4.824207 |
| C | -4.520730 | -3.578125 | -2.789268 |
| C | 2.254097  | -4.271226 | -3.533365 |
| H | 0.747704  | -0.472547 | 0.089355  |
| H | 2.386167  | 2.947346  | 4.238371  |
| H | 0.972842  | 3.978190  | 4.367114  |
| H | 1.285591  | 2.751518  | 5.611845  |
| H | 0.308351  | 0.899762  | 5.562592  |
| H | -0.975011 | -1.935721 | 5.381290  |
| H | -1.141673 | -0.436290 | 6.304994  |
| H | -2.489928 | -1.051998 | 5.326384  |
| H | 2.748000  | 1.712801  | 2.245114  |
| H | 4.260019  | 3.545410  | 3.189248  |
| H | 5.105420  | 2.164877  | 2.465643  |
| H | 4.990450  | 3.693042  | 1.585875  |
| H | 3.808437  | 2.631597  | -0.471710 |
| H | 4.226813  | 1.110475  | 0.342060  |
| H | 2.565172  | 1.406893  | -0.190758 |
| H | 3.456282  | 5.024611  | 0.670744  |
| H | 1.824232  | 6.877925  | 0.604987  |
| H | -0.489324 | 6.509024  | 1.390882  |
| H | -1.775763 | 3.207916  | 2.598161  |
| H | -2.876170 | 4.898309  | 4.046891  |
| H | -1.170028 | 4.715536  | 4.481340  |
| H | -1.697165 | 6.121322  | 3.542899  |
| H | -2.544655 | 4.127595  | 0.404303  |
| H | -3.677721 | 4.502198  | 1.715984  |
| H | -2.597687 | 5.756511  | 1.098436  |
| H | -3.190785 | 1.058822  | 2.588947  |
| H | -5.513934 | 0.322934  | 4.439704  |
| H | -3.873964 | 0.759981  | 4.948211  |
| H | -4.902142 | 1.962734  | 4.154431  |
| H | -5.289642 | 1.896916  | 1.665022  |
| H | -4.778863 | 0.492658  | 0.708446  |
| H | -6.091217 | 0.340357  | 1.886320  |
| H | -5.736050 | -1.674796 | 2.712727  |
| H | -5.166115 | -4.078364 | 2.765177  |
| H | -2.800311 | -4.779703 | 2.866414  |
| H | 0.044270  | -2.414554 | 3.329713  |
| H | -0.858409 | -5.315828 | 3.731601  |
| H | 0.669067  | -4.577920 | 4.215274  |
| H | -0.838525 | -4.111053 | 5.025340  |
| H | -0.049909 | -2.927741 | 0.916868  |
| H | 1.004367  | -4.078054 | 1.755074  |
| H | -0.628708 | -4.560338 | 1.260494  |
| H | -0.767746 | -3.806790 | -4.662416 |
| H | -1.389351 | -2.688176 | -5.891833 |

|   |           |           |           |
|---|-----------|-----------|-----------|
| H | -2.402036 | -3.186710 | -4.526688 |
| H | -0.844166 | -0.673735 | -5.827424 |
| H | 1.424752  | 0.604698  | -6.317230 |
| H | 1.215684  | 2.180272  | -5.547836 |
| H | -0.139968 | 1.406510  | -6.401264 |
| H | -3.139944 | -1.950031 | -2.610216 |
| H | -4.176143 | -3.994834 | -3.742078 |
| H | -5.347848 | -2.889986 | -3.000791 |
| H | -4.931310 | -4.405622 | -2.198933 |
| H | -4.225812 | -3.228806 | -0.050610 |
| H | -4.822962 | -1.738150 | -0.797263 |
| H | -3.186194 | -1.810374 | -0.111454 |
| H | -3.255659 | -5.371094 | -1.141845 |
| H | -1.279312 | -6.829624 | -0.869275 |
| H | 0.971447  | -5.953535 | -1.397098 |
| H | 1.635715  | -2.469489 | -2.563750 |
| H | 3.257548  | -3.901922 | -3.778257 |
| H | 1.619830  | -4.131034 | -4.415391 |
| H | 2.332193  | -5.349271 | -3.346126 |
| H | 2.286049  | -3.084201 | -0.258242 |
| H | 3.643421  | -3.322680 | -1.373168 |
| H | 2.730536  | -4.717218 | -0.785107 |
| H | 2.617002  | -0.620730 | -3.622029 |
| H | 5.213377  | 0.334920  | -4.942760 |
| H | 3.657178  | 0.199198  | -5.769320 |
| H | 4.449975  | -1.250733 | -5.124561 |
| H | 4.711236  | -1.575160 | -2.651581 |
| H | 3.866664  | -0.529219 | -1.493776 |
| H | 5.313059  | 0.056966  | -2.330692 |
| H | 5.150513  | 2.114827  | -3.421516 |
| H | 4.588243  | 4.509504  | -3.168633 |
| H | 2.220427  | 5.200161  | -3.008194 |
| H | -0.663593 | 2.836259  | -3.024556 |
| H | 0.261881  | 5.326344  | -4.552437 |
| H | -1.415255 | 4.787358  | -4.368855 |
| H | -0.266426 | 3.808451  | -5.293288 |
| H | 0.016842  | 4.161564  | -0.969479 |
| H | -1.340238 | 4.881078  | -1.858461 |
| H | 0.279303  | 5.568345  | -1.996922 |
| H | 2.900194  | -0.447633 | 4.620762  |
| H | 4.561208  | -0.494494 | 5.443057  |
| H | 3.719760  | -1.872429 | 2.825809  |
| H | 6.262494  | -1.783686 | 2.623537  |
| H | 6.390807  | -1.739521 | 4.381422  |
| H | 5.370077  | -4.027898 | 4.504519  |
| H | 5.196143  | -4.057652 | 2.755748  |
| H | 7.866447  | -3.848268 | 4.246690  |
| H | 7.686731  | -3.874093 | 2.499766  |
| H | 6.860013  | -6.160482 | 4.391149  |
| H | 8.294872  | -6.146254 | 3.354106  |
| H | 6.679121  | -6.186514 | 2.631396  |
| H | -2.327734 | 1.408412  | 0.330085  |
| H | -1.236851 | 2.274717  | -0.700728 |
| H | -3.248952 | 0.126475  | -1.555537 |
| H | -2.174293 | 0.906497  | -2.690269 |
| H | -4.244866 | 2.361406  | -0.990896 |
| H | -3.152047 | 3.127266  | -2.133089 |
| H | -4.153096 | 1.769822  | -4.001570 |
| H | -5.250127 | 1.009236  | -2.858437 |
| H | -5.151960 | 4.010669  | -3.468293 |

|   |           |          |           |
|---|-----------|----------|-----------|
| H | -6.245371 | 3.251840 | -2.322606 |
| H | -6.184162 | 2.674528 | -5.347473 |
| H | -7.399620 | 3.650571 | -4.507967 |
| H | -7.286536 | 1.912042 | -4.192697 |

184

[TS-C1C2] scf done: -3350.636576 / Energies= -3348.909566 / Enthalpies= -3348.908622 / Free Energies= -3349.130180

|    |           |           |           |
|----|-----------|-----------|-----------|
| C  | 20.220696 | 16.362324 | 9.256352  |
| C  | 19.908199 | 17.737910 | 9.388762  |
| C  | 18.553523 | 18.152891 | 9.408736  |
| C  | 17.547314 | 17.188040 | 9.297791  |
| C  | 17.845774 | 15.837235 | 9.172787  |
| C  | 19.175822 | 15.438259 | 9.149536  |
| N  | 20.950169 | 18.714366 | 9.539212  |
| C  | 21.289408 | 19.048392 | 10.784177 |
| C  | 20.736851 | 18.294718 | 11.982185 |
| C  | 18.142433 | 19.608284 | 9.579504  |
| C  | 17.351547 | 20.115652 | 8.365724  |
| C  | 21.647250 | 15.833998 | 9.289337  |
| C  | 21.988402 | 15.036988 | 8.024645  |
| C  | 22.124376 | 20.128358 | 11.144252 |
| C  | 22.510992 | 21.281354 | 10.430577 |
| C  | 23.071139 | 22.402036 | 11.288935 |
| N  | 22.402617 | 21.435534 | 9.110411  |
| C  | 22.635465 | 22.745406 | 8.576283  |
| C  | 23.946741 | 23.209603 | 8.312453  |
| C  | 24.117124 | 24.503451 | 7.808490  |
| C  | 23.034030 | 25.337529 | 7.569535  |
| C  | 21.748741 | 24.872527 | 7.821986  |
| C  | 21.521533 | 23.585669 | 8.319497  |
| C  | 25.180407 | 22.350453 | 8.544263  |
| C  | 25.714082 | 21.794739 | 7.217763  |
| C  | 20.098352 | 23.132428 | 8.616405  |
| C  | 19.053124 | 23.770485 | 7.694178  |
| C  | 26.299745 | 23.089804 | 9.292605  |
| C  | 19.713004 | 23.393774 | 10.082011 |
| C  | 17.327108 | 19.825979 | 10.863708 |
| C  | 21.913714 | 14.976588 | 10.537302 |
| Mg | 22.200092 | 19.605986 | 8.026117  |
| C  | 24.215353 | 18.640635 | 8.630123  |
| C  | 24.575049 | 17.716288 | 7.662694  |
| C  | 25.946450 | 17.726689 | 7.038923  |
| C  | 26.977112 | 17.158639 | 8.032664  |
| C  | 28.394601 | 17.086811 | 7.462643  |
| C  | 29.409358 | 16.537944 | 8.463919  |
| C  | 21.207108 | 20.095310 | 6.059833  |
| C  | 20.488892 | 20.192473 | 4.690676  |
| C  | 19.410571 | 21.279512 | 4.601526  |
| C  | 18.679341 | 21.301678 | 3.257842  |
| C  | 17.629813 | 22.408929 | 3.148723  |
| C  | 16.898511 | 22.414577 | 1.807735  |
| Mg | 22.626682 | 18.615954 | 4.789897  |
| N  | 23.529306 | 19.597641 | 3.085468  |
| C  | 22.982613 | 19.434881 | 1.881150  |
| C  | 21.970051 | 18.507935 | 1.558500  |
| C  | 21.468109 | 17.395700 | 2.260684  |
| N  | 21.669012 | 17.148030 | 3.555062  |
| C  | 21.261328 | 15.863060 | 4.045717  |
| C  | 19.921345 | 15.617954 | 4.436688  |
| C  | 19.581024 | 14.353442 | 4.927326  |

|   |           |           |           |
|---|-----------|-----------|-----------|
| C | 20.516459 | 13.329927 | 5.012894  |
| C | 21.823447 | 13.570897 | 4.609402  |
| C | 22.219924 | 14.823142 | 4.129059  |
| C | 18.835806 | 16.678973 | 4.337060  |
| C | 18.506637 | 17.260663 | 5.716089  |
| C | 23.656714 | 15.005426 | 3.663846  |
| C | 24.665688 | 14.639696 | 4.759329  |
| C | 24.687953 | 20.437060 | 3.196607  |
| C | 24.579201 | 21.846378 | 3.277770  |
| C | 25.745575 | 22.607386 | 3.423942  |
| C | 26.998395 | 22.015119 | 3.476370  |
| C | 27.100636 | 20.632513 | 3.369626  |
| C | 25.969698 | 19.824272 | 3.223751  |
| C | 23.254571 | 22.589915 | 3.180508  |
| C | 22.912187 | 23.306255 | 4.491652  |
| C | 26.135869 | 18.321890 | 3.031088  |
| C | 27.450200 | 17.770669 | 3.594625  |
| C | 23.439402 | 20.266179 | 0.693098  |
| C | 26.033547 | 17.925227 | 1.547964  |
| C | 23.245755 | 23.607430 | 2.027218  |
| C | 20.678186 | 16.413814 | 1.414300  |
| C | 17.551991 | 16.165255 | 3.667056  |
| C | 23.937809 | 14.201064 | 2.385025  |
| H | 23.736207 | 17.901239 | 6.074643  |
| H | 24.154572 | 22.488915 | 11.150042 |
| H | 22.639504 | 23.369592 | 11.018960 |
| H | 22.880915 | 22.217375 | 12.348585 |
| H | 22.344866 | 20.171951 | 12.205676 |
| H | 21.511583 | 18.199150 | 12.749514 |
| H | 19.909791 | 18.857886 | 12.429968 |
| H | 20.361570 | 17.303017 | 11.729850 |
| H | 24.879016 | 21.500913 | 9.164639  |
| H | 25.938720 | 23.553014 | 10.217672 |
| H | 27.103110 | 22.390161 | 9.552714  |
| H | 26.746794 | 23.880877 | 8.679518  |
| H | 26.011235 | 22.603967 | 6.541881  |
| H | 26.593234 | 21.161059 | 7.387399  |
| H | 24.960548 | 21.195981 | 6.694843  |
| H | 25.122212 | 24.863719 | 7.604251  |
| H | 23.187957 | 26.343061 | 7.185480  |
| H | 20.903604 | 25.527207 | 7.631125  |
| H | 20.067066 | 22.047636 | 8.457599  |
| H | 18.669599 | 23.104980 | 10.259510 |
| H | 20.336574 | 22.825052 | 10.777092 |
| H | 19.811617 | 24.459352 | 10.324662 |
| H | 19.330109 | 23.681095 | 6.639228  |
| H | 18.084468 | 23.277611 | 7.831849  |
| H | 18.903064 | 24.833744 | 7.918026  |
| H | 19.055290 | 20.207093 | 9.658282  |
| H | 16.366287 | 19.298807 | 10.821812 |
| H | 17.860422 | 19.467876 | 11.749988 |
| H | 17.112942 | 20.892181 | 11.005333 |
| H | 17.082128 | 21.170490 | 8.495978  |
| H | 17.933749 | 20.023692 | 7.443488  |
| H | 16.420650 | 19.551912 | 8.229130  |
| H | 16.506709 | 17.503766 | 9.320538  |
| H | 17.048581 | 15.101498 | 9.098337  |
| H | 19.413043 | 14.380845 | 9.059905  |
| H | 22.318377 | 16.696266 | 9.338953  |
| H | 21.281811 | 14.080297 | 10.546069 |

|   |           |           |           |
|---|-----------|-----------|-----------|
| H | 22.959404 | 14.645581 | 10.553812 |
| H | 21.722246 | 15.527950 | 11.463312 |
| H | 21.867594 | 15.636281 | 7.116849  |
| H | 23.024921 | 14.679655 | 8.065195  |
| H | 21.347237 | 14.155764 | 7.918357  |
| H | 21.089634 | 15.403167 | 1.499859  |
| H | 20.689799 | 16.704399 | 0.361637  |
| H | 19.635683 | 16.353909 | 1.741906  |
| H | 21.641809 | 18.564322 | 0.526376  |
| H | 23.373126 | 19.685710 | -0.230897 |
| H | 24.461336 | 20.631767 | 0.805108  |
| H | 22.783384 | 21.137291 | 0.579103  |
| H | 19.224458 | 17.491411 | 3.714346  |
| H | 17.750893 | 15.691592 | 2.699021  |
| H | 16.856599 | 16.996821 | 3.501060  |
| H | 17.032594 | 15.430030 | 4.292796  |
| H | 18.099705 | 16.492002 | 6.381102  |
| H | 17.762541 | 18.062316 | 5.631649  |
| H | 19.396582 | 17.669305 | 6.204166  |
| H | 18.556352 | 14.164940 | 5.237375  |
| H | 20.226796 | 12.349776 | 5.384337  |
| H | 22.554374 | 12.767032 | 4.660607  |
| H | 23.794090 | 16.065065 | 3.425846  |
| H | 24.968725 | 14.363156 | 2.047077  |
| H | 23.268283 | 14.492368 | 1.568803  |
| H | 23.807601 | 13.125233 | 2.555955  |
| H | 24.482457 | 15.222491 | 5.667052  |
| H | 25.688738 | 14.844247 | 4.420968  |
| H | 24.614653 | 13.576048 | 5.022166  |
| H | 25.310335 | 17.832120 | 3.564050  |
| H | 26.791240 | 18.454319 | 0.956382  |
| H | 25.051055 | 18.147873 | 1.126126  |
| H | 26.207352 | 16.848337 | 1.430801  |
| H | 27.423694 | 16.674908 | 3.589967  |
| H | 27.632024 | 18.101751 | 4.621002  |
| H | 28.311335 | 18.069958 | 2.983956  |
| H | 28.084682 | 20.174537 | 3.391146  |
| H | 27.892136 | 22.624395 | 3.587784  |
| H | 25.664250 | 23.689930 | 3.488655  |
| H | 22.468332 | 21.854183 | 2.983753  |
| H | 23.931231 | 24.439890 | 2.225758  |
| H | 22.242567 | 24.034241 | 1.906174  |
| H | 23.543577 | 23.158280 | 1.074800  |
| H | 22.885389 | 22.616821 | 5.339479  |
| H | 21.935596 | 23.799543 | 4.421037  |
| H | 23.653254 | 24.078174 | 4.725886  |
| H | 23.623532 | 18.321170 | 9.488473  |
| H | 24.866463 | 19.494394 | 8.803056  |
| H | 24.098515 | 16.739127 | 7.701212  |
| H | 25.949259 | 17.134535 | 6.119179  |
| H | 26.224772 | 18.751219 | 6.765410  |
| H | 26.977320 | 17.772676 | 8.943067  |
| H | 26.663176 | 16.151515 | 8.345762  |
| H | 28.706420 | 18.090040 | 7.138175  |
| H | 28.394763 | 16.460421 | 6.560024  |
| H | 29.458632 | 17.165009 | 9.362700  |
| H | 30.415830 | 16.495573 | 8.031841  |
| H | 29.141298 | 15.523391 | 8.783707  |
| H | 20.380570 | 19.899399 | 6.774945  |
| H | 21.539990 | 21.122765 | 6.295346  |

|   |           |           |          |
|---|-----------|-----------|----------|
| H | 20.023503 | 19.230380 | 4.443999 |
| H | 21.206825 | 20.388185 | 3.879389 |
| H | 18.683126 | 21.133227 | 5.412774 |
| H | 19.877417 | 22.257810 | 4.782605 |
| H | 19.412034 | 21.415166 | 2.444715 |
| H | 18.195484 | 20.327359 | 3.091738 |
| H | 18.113892 | 23.383558 | 3.305977 |
| H | 16.899957 | 22.298410 | 3.963631 |
| H | 17.598458 | 22.558124 | 0.975139 |
| H | 16.154273 | 23.217875 | 1.758704 |
| H | 16.375275 | 21.465305 | 1.638084 |

184

[C2] scf done: -3350.728814 / Energies= -3348.996597 / Enthalpies= -3348.995652 /

Free Energies= -3349.242087

|    |           |           |           |
|----|-----------|-----------|-----------|
| C  | -0.419368 | -1.964879 | 6.792628  |
| C  | -0.966953 | -1.104784 | 5.811881  |
| C  | -1.774351 | -1.624698 | 4.772613  |
| C  | -2.011329 | -3.001955 | 4.733850  |
| C  | -1.475176 | -3.856784 | 5.689991  |
| C  | -0.687264 | -3.334770 | 6.708680  |
| N  | -0.624328 | 0.285118  | 5.819390  |
| C  | -1.422552 | 1.163094  | 6.426325  |
| C  | -2.677665 | 0.669873  | 7.112352  |
| C  | -2.362864 | -0.735366 | 3.685910  |
| C  | -1.660285 | -0.973182 | 2.340372  |
| C  | 0.455370  | -1.446073 | 7.925290  |
| C  | 1.897251  | -1.960894 | 7.800277  |
| C  | -1.188907 | 2.550847  | 6.477903  |
| C  | -0.137961 | 3.317450  | 5.937682  |
| C  | -0.215673 | 4.812708  | 6.154081  |
| N  | 0.890794  | 2.810388  | 5.260876  |
| C  | 1.906495  | 3.678590  | 4.748755  |
| C  | 3.067514  | 3.926547  | 5.517471  |
| C  | 4.088109  | 4.702176  | 4.959103  |
| C  | 3.978901  | 5.226331  | 3.676467  |
| C  | 2.833985  | 4.974677  | 2.929485  |
| C  | 1.785028  | 4.205358  | 3.441655  |
| C  | 3.244823  | 3.351184  | 6.915427  |
| C  | 4.322312  | 2.255508  | 6.925950  |
| C  | 0.568343  | 3.923321  | 2.571421  |
| C  | 0.916191  | 2.928291  | 1.453012  |
| C  | 3.561775  | 4.430377  | 7.960139  |
| C  | -0.050158 | 5.199298  | 1.983768  |
| C  | -3.880276 | -0.914669 | 3.535119  |
| C  | -0.121694 | -1.789662 | 9.306549  |
| Mg | 1.132932  | 0.802619  | 4.876821  |
| C  | 2.745580  | -0.223411 | 3.952733  |
| C  | 2.437019  | -1.280187 | 2.880602  |
| C  | 3.660790  | -1.948023 | 2.228806  |
| C  | 4.484768  | -2.826659 | 3.170239  |
| C  | 5.679175  | -3.497797 | 2.489647  |
| C  | 6.498037  | -4.374531 | 3.435328  |
| C  | -1.788814 | 0.318993  | -3.274834 |
| C  | -3.320942 | 0.422290  | -3.317361 |
| C  | -3.948690 | 1.051327  | -2.066588 |
| C  | -5.473113 | 1.164060  | -2.122137 |
| C  | -6.091632 | 1.789312  | -0.870488 |
| C  | -7.613542 | 1.900880  | -0.937922 |
| Mg | -0.755030 | -0.561109 | -4.906200 |
| N  | 0.893446  | 0.095731  | -5.949030 |



|   |           |           |           |
|---|-----------|-----------|-----------|
| C | 1.492690  | -0.605727 | -6.909366 |
| C | 1.077406  | -1.881842 | -7.337803 |
| C | -0.000744 | -2.679300 | -6.907948 |
| N | -0.869437 | -2.326670 | -5.960585 |
| C | -1.948412 | -3.203094 | -5.618210 |
| C | -3.177562 | -3.109409 | -6.313568 |
| C | -4.249026 | -3.901166 | -5.890282 |
| C | -4.125631 | -4.771878 | -4.813685 |
| C | -2.911828 | -4.861713 | -4.143152 |
| C | -1.809737 | -4.090271 | -4.525041 |
| C | -3.370616 | -2.158794 | -7.487103 |
| C | -4.287289 | -0.986510 | -7.105577 |
| C | -0.506528 | -4.220049 | -3.748930 |
| C | -0.659449 | -3.702219 | -2.310637 |
| C | 1.406638  | 1.377915  | -5.573722 |
| C | 0.880261  | 2.545064  | -6.174250 |
| C | 1.326174  | 3.790868  | -5.722776 |
| C | 2.268482  | 3.896613  | -4.706454 |
| C | 2.778806  | 2.742746  | -4.123234 |
| C | 2.365080  | 1.473256  | -4.537779 |
| C | -0.178320 | 2.477419  | -7.265828 |
| C | -1.548289 | 2.916467  | -6.725086 |
| C | 2.922877  | 0.239123  | -3.843121 |
| C | 2.357166  | 0.109894  | -2.420014 |
| C | 2.704093  | -0.024473 | -7.604563 |
| C | 4.457549  | 0.216567  | -3.816828 |
| C | 0.199376  | 3.294023  | -8.509226 |
| C | -0.157081 | -4.019232 | -7.593048 |
| C | -3.906489 | -2.870613 | -8.737905 |
| C | 0.027258  | -5.660065 | -3.748905 |
| H | 1.845615  | -0.823940 | 2.071784  |
| H | 0.692460  | 5.186221  | 6.638983  |
| H | -0.293072 | 5.337060  | 5.194925  |
| H | -1.078000 | 5.083014  | 6.767362  |
| H | -1.942066 | 3.120612  | 7.010013  |
| H | -2.443544 | -0.118205 | 7.835608  |
| H | -3.192793 | 1.481233  | 7.631099  |
| H | -3.369170 | 0.229231  | 6.385647  |
| H | 2.296286  | 2.885933  | 7.206151  |
| H | 2.800514  | 5.218462  | 7.970539  |
| H | 3.604648  | 3.988015  | 8.962727  |
| H | 4.530548  | 4.907541  | 7.770700  |
| H | 5.303561  | 2.666573  | 6.659087  |
| H | 4.407285  | 1.804180  | 7.922352  |
| H | 4.094861  | 1.459888  | 6.207299  |
| H | 4.987192  | 4.895806  | 5.539689  |
| H | 4.784011  | 5.826407  | 3.259653  |
| H | 2.753587  | 5.380949  | 1.923976  |
| H | -0.193341 | 3.453992  | 3.203917  |
| H | -0.969465 | 4.958259  | 1.436953  |
| H | -0.302071 | 5.924550  | 2.765931  |
| H | 0.628384  | 5.693973  | 1.278968  |
| H | 1.330527  | 1.996593  | 1.856244  |
| H | 0.026772  | 2.679678  | 0.861500  |
| H | 1.665766  | 3.349246  | 0.771886  |
| H | -2.182428 | 0.306656  | 3.972200  |
| H | -4.136275 | -1.918538 | 3.176321  |
| H | -4.405187 | -0.759347 | 4.484503  |
| H | -4.276575 | -0.196643 | 2.807395  |
| H | -2.049329 | -0.293265 | 1.572803  |

|   |           |           |           |
|---|-----------|-----------|-----------|
| H | -0.578096 | -0.819473 | 2.416823  |
| H | -1.818615 | -2.000496 | 1.990644  |
| H | -2.625782 | -3.412536 | 3.935962  |
| H | -1.670769 | -4.925119 | 5.641052  |
| H | -0.268627 | -4.004914 | 7.456222  |
| H | 0.485058  | -0.353253 | 7.848367  |
| H | -0.147205 | -2.872792 | 9.475107  |
| H | 0.494252  | -1.346782 | 10.098616 |
| H | -1.143785 | -1.412552 | 9.423660  |
| H | 2.335945  | -1.695229 | 6.832100  |
| H | 2.528617  | -1.536622 | 8.590756  |
| H | 1.937658  | -3.053125 | 7.891114  |
| H | -1.100701 | -4.065672 | -8.147834 |
| H | -0.188322 | -4.831195 | -6.858951 |
| H | 0.662223  | -4.208161 | -8.290005 |
| H | 1.682972  | -2.318647 | -8.123662 |
| H | 3.076027  | -0.693617 | -8.383494 |
| H | 3.512784  | 0.160745  | -6.888965 |
| H | 2.464623  | 0.943098  | -8.059058 |
| H | -2.390839 | -1.740885 | -7.742946 |
| H | -3.271264 | -3.714497 | -9.029821 |
| H | -3.950537 | -2.172599 | -9.582619 |
| H | -4.919741 | -3.259049 | -8.581306 |
| H | -5.294156 | -1.339754 | -6.851866 |
| H | -4.379439 | -0.279710 | -7.939488 |
| H | -3.905287 | -0.441314 | -6.235461 |
| H | -5.199868 | -3.832067 | -6.413462 |
| H | -4.971650 | -5.378119 | -4.499562 |
| H | -2.815833 | -5.544476 | -3.301910 |
| H | 0.242008  | -3.595594 | -4.249678 |
| H | 0.997641  | -5.706584 | -3.240224 |
| H | 0.160374  | -6.042431 | -4.767070 |
| H | -0.652646 | -6.342355 | -3.225054 |
| H | -1.005356 | -2.662726 | -2.292170 |
| H | 0.297521  | -3.754458 | -1.777262 |
| H | -1.387595 | -4.301092 | -1.750291 |
| H | 2.594321  | -0.639006 | -4.410017 |
| H | 4.866840  | 1.031191  | -3.207884 |
| H | 4.881189  | 0.309815  | -4.823241 |
| H | 4.815162  | -0.725341 | -3.384184 |
| H | 2.715642  | -0.809425 | -1.941189 |
| H | 1.261073  | 0.090931  | -2.421107 |
| H | 2.667835  | 0.955895  | -1.795264 |
| H | 3.510930  | 2.828296  | -3.323738 |
| H | 2.602338  | 4.874664  | -4.368807 |
| H | 0.924379  | 4.695235  | -6.173673 |
| H | -0.266383 | 1.430817  | -7.578216 |
| H | 0.245033  | 4.367904  | -8.293399 |
| H | -0.547730 | 3.150790  | -9.299147 |
| H | 1.175000  | 2.993763  | -8.907774 |
| H | -1.849841 | 2.318090  | -5.857090 |
| H | -2.321805 | 2.816005  | -7.496483 |
| H | -1.526368 | 3.965179  | -6.404433 |
| H | 3.350076  | -0.685297 | 4.751606  |
| H | 3.407029  | 0.544333  | 3.513943  |
| H | 1.795797  | -2.071047 | 3.300838  |
| H | 3.325470  | -2.563230 | 1.378286  |
| H | 4.309007  | -1.164979 | 1.805755  |
| H | 4.846663  | -2.223874 | 4.014748  |
| H | 3.833331  | -3.601336 | 3.604316  |

|   |           |           |           |
|---|-----------|-----------|-----------|
| H | 6.327894  | -2.724201 | 2.053773  |
| H | 5.322397  | -4.104535 | 1.644510  |
| H | 6.898264  | -3.787229 | 4.271292  |
| H | 7.346091  | -4.842383 | 2.921288  |
| H | 5.883562  | -5.177222 | 3.862070  |
| H | -1.505769 | -0.228633 | -2.358164 |
| H | -1.369768 | 1.329772  | -3.129566 |
| H | -3.766457 | -0.573986 | -3.463963 |
| H | -3.636645 | 1.016121  | -4.190846 |
| H | -3.658068 | 0.456321  | -1.186900 |
| H | -3.512789 | 2.050635  | -1.913509 |
| H | -5.761791 | 1.759155  | -3.002395 |
| H | -5.906654 | 0.164296  | -2.278684 |
| H | -5.657262 | 2.787201  | -0.713155 |
| H | -5.806771 | 1.193622  | 0.009033  |
| H | -7.927723 | 2.519874  | -1.787655 |
| H | -8.026423 | 2.351739  | -0.027724 |
| H | -8.077787 | 0.914320  | -1.060673 |

181

[D1] scf done: -3637.752165 / Energies= -3636.076840 / Enthalpies= -3636.075895 /  
Free Energies= -3636.333279

|    |           |           |           |
|----|-----------|-----------|-----------|
| C  | 10.496741 | 15.477121 | 6.345280  |
| C  | 11.288714 | 14.794982 | 7.298062  |
| C  | 12.263788 | 15.492117 | 8.050333  |
| C  | 12.425831 | 16.863082 | 7.830992  |
| C  | 11.653087 | 17.543472 | 6.896991  |
| C  | 10.698640 | 16.848934 | 6.163732  |
| N  | 11.167587 | 13.375770 | 7.435621  |
| C  | 10.364409 | 12.865636 | 8.369678  |
| C  | 10.198283 | 11.488876 | 8.613141  |
| C  | 10.795285 | 10.375858 | 7.988645  |
| C  | 10.417896 | 9.015926  | 8.533235  |
| C  | 13.157760 | 14.786066 | 9.060710  |
| C  | 13.142685 | 15.462275 | 10.438872 |
| C  | 9.449389  | 14.760723 | 5.504298  |
| C  | 8.053290  | 15.381305 | 5.658949  |
| Mg | 12.269314 | 12.229267 | 6.128105  |
| N  | 11.652828 | 10.455637 | 6.973122  |
| C  | 12.207806 | 9.262648  | 6.410617  |
| C  | 13.439536 | 8.767772  | 6.899303  |
| C  | 14.010555 | 7.655213  | 6.274528  |
| C  | 13.392890 | 7.037108  | 5.193556  |
| C  | 12.183981 | 7.533275  | 4.720376  |
| C  | 11.571129 | 8.643045  | 5.310168  |
| C  | 14.170020 | 9.435407  | 8.055831  |
| C  | 14.553607 | 8.446270  | 9.165073  |
| C  | 10.261475 | 9.165151  | 4.736749  |
| C  | 9.174961  | 8.082267  | 4.672014  |
| C  | 15.409426 | 10.192855 | 7.553691  |
| C  | 10.479522 | 9.793618  | 3.351526  |
| C  | 9.567715  | 13.803327 | 9.250014  |
| C  | 14.596922 | 14.673651 | 8.534191  |
| C  | 9.860283  | 14.719128 | 4.024293  |
| C  | 13.489151 | 12.543723 | 4.422226  |
| C  | 14.468050 | 13.726075 | 4.368403  |
| C  | 15.242783 | 13.842481 | 3.049512  |
| C  | 16.219956 | 15.018231 | 2.997619  |
| C  | 16.981038 | 15.127639 | 1.675254  |
| C  | 17.956300 | 16.302577 | 1.632841  |
| Si | 20.770736 | 12.779604 | 7.617041  |

|    |           |           |           |
|----|-----------|-----------|-----------|
| C  | 21.128608 | 14.237197 | 6.494784  |
| C  | 20.238285 | 15.319667 | 6.412246  |
| C  | 20.514373 | 16.417469 | 5.597701  |
| C  | 21.688072 | 16.450342 | 4.846124  |
| C  | 22.583025 | 15.381971 | 4.910566  |
| C  | 22.303565 | 14.287196 | 5.726391  |
| C  | 25.569820 | 18.066984 | 7.175854  |
| C  | 26.499307 | 17.475746 | 8.244850  |
| C  | 25.750398 | 17.303093 | 9.576101  |
| C  | 27.767111 | 18.294381 | 8.441978  |
| C  | 29.050615 | 17.700697 | 8.419093  |
| C  | 30.207315 | 18.479593 | 8.653773  |
| C  | 30.055094 | 19.847506 | 8.899500  |
| C  | 28.799514 | 20.443065 | 8.918291  |
| C  | 27.669226 | 19.666197 | 8.692791  |
| N  | 29.173390 | 16.283537 | 8.255899  |
| Mg | 29.132340 | 15.158796 | 9.966029  |
| N  | 29.360102 | 13.379483 | 8.978326  |
| C  | 29.461006 | 13.283800 | 7.653202  |
| C  | 29.431634 | 14.382531 | 6.771996  |
| C  | 29.304804 | 15.760272 | 7.037562  |
| C  | 29.323825 | 16.681925 | 5.838384  |
| C  | 31.598304 | 17.862656 | 8.686710  |
| C  | 32.588196 | 18.583423 | 7.761222  |
| C  | 29.413597 | 12.200055 | 9.788241  |
| C  | 28.212976 | 11.553692 | 10.162154 |
| C  | 28.284090 | 10.454734 | 11.023736 |
| C  | 29.501662 | 9.997427  | 11.513271 |
| C  | 30.674670 | 10.646577 | 11.146082 |
| C  | 30.657984 | 11.749015 | 10.286740 |
| C  | 26.853225 | 12.044129 | 9.686085  |
| C  | 26.067560 | 12.681247 | 10.843430 |
| C  | 31.962657 | 12.456518 | 9.949550  |
| C  | 33.041724 | 11.496944 | 9.428955  |
| C  | 29.622668 | 11.918294 | 7.022953  |
| C  | 32.480965 | 13.245116 | 11.163135 |
| C  | 26.028263 | 10.935491 | 9.017683  |
| C  | 32.138212 | 17.814648 | 10.125025 |
| H  | 28.976950 | 15.558487 | 11.633942 |
| H  | 21.510294 | 12.878477 | 8.906012  |
| H  | 21.179269 | 11.505952 | 6.966025  |
| H  | 10.233051 | 14.440093 | 9.843290  |
| H  | 8.952407  | 14.477512 | 8.644572  |
| H  | 8.916297  | 13.252665 | 9.932149  |
| H  | 9.510458  | 11.247231 | 9.415351  |
| H  | 9.708138  | 9.099425  | 9.359127  |
| H  | 9.973133  | 8.391364  | 7.750930  |
| H  | 11.306119 | 8.481745  | 8.888436  |
| H  | 12.775617 | 13.767698 | 9.191437  |
| H  | 12.124589 | 15.560070 | 10.832102 |
| H  | 13.727204 | 14.874217 | 11.156524 |
| H  | 13.581878 | 16.466255 | 10.404363 |
| H  | 15.039947 | 15.666087 | 8.387218  |
| H  | 15.228249 | 14.123613 | 9.242890  |
| H  | 14.634404 | 14.155047 | 7.569425  |
| H  | 13.175533 | 17.407531 | 8.400407  |
| H  | 11.795485 | 18.609819 | 6.740428  |
| H  | 10.096529 | 17.381845 | 5.431352  |
| H  | 9.386710  | 13.726381 | 5.861405  |
| H  | 8.023338  | 16.409683 | 5.280067  |

|   |           |           |           |
|---|-----------|-----------|-----------|
| H | 7.313690  | 14.800712 | 5.094509  |
| H | 7.735132  | 15.405168 | 6.707233  |
| H | 10.838498 | 14.243503 | 3.890870  |
| H | 9.124279  | 14.159416 | 3.433951  |
| H | 9.926614  | 15.730390 | 3.604871  |
| H | 9.896566  | 9.953740  | 5.404318  |
| H | 9.001902  | 7.622545  | 5.651543  |
| H | 8.227176  | 8.514658  | 4.329226  |
| H | 9.441624  | 7.280963  | 3.972795  |
| H | 10.832393 | 9.045554  | 2.631202  |
| H | 9.543212  | 10.215627 | 2.965665  |
| H | 11.228148 | 10.593087 | 3.385511  |
| H | 11.706525 | 7.050390  | 3.870776  |
| H | 13.853527 | 6.173835  | 4.719725  |
| H | 14.959506 | 7.267868  | 6.638133  |
| H | 13.489828 | 10.171856 | 8.498371  |
| H | 15.293823 | 7.714393  | 8.821034  |
| H | 14.994049 | 8.981244  | 10.015028 |
| H | 13.682344 | 7.890519  | 9.529733  |
| H | 15.147309 | 10.932701 | 6.787953  |
| H | 15.907526 | 10.715791 | 8.379331  |
| H | 16.135251 | 9.504448  | 7.104187  |
| H | 28.788464 | 11.262587 | 7.295499  |
| H | 30.532785 | 11.428918 | 7.387047  |
| H | 29.674608 | 11.984843 | 5.934105  |
| H | 29.526893 | 14.127881 | 5.722701  |
| H | 28.398961 | 17.266533 | 5.782734  |
| H | 29.440633 | 16.123187 | 4.907249  |
| H | 30.143041 | 17.405037 | 5.917968  |
| H | 27.024542 | 12.821948 | 8.933320  |
| H | 26.568697 | 10.476665 | 8.181925  |
| H | 25.086879 | 11.342807 | 8.629813  |
| H | 25.772798 | 10.138023 | 9.724997  |
| H | 25.850740 | 11.942019 | 11.624063 |
| H | 25.111628 | 13.084941 | 10.487904 |
| H | 26.630729 | 13.495835 | 11.314143 |
| H | 27.366852 | 9.951445  | 11.320688 |
| H | 29.536095 | 9.142070  | 12.183415 |
| H | 31.624826 | 10.293558 | 11.539927 |
| H | 31.754832 | 13.177465 | 9.151045  |
| H | 33.357873 | 10.783784 | 10.199102 |
| H | 33.931223 | 12.058166 | 9.118501  |
| H | 32.688628 | 10.919479 | 8.567060  |
| H | 31.736056 | 13.961874 | 11.528802 |
| H | 33.392835 | 13.798560 | 10.906815 |
| H | 32.718318 | 12.571456 | 11.995507 |
| H | 31.513044 | 16.830084 | 8.329667  |
| H | 32.216672 | 18.632273 | 6.731427  |
| H | 33.549898 | 18.056531 | 7.749382  |
| H | 32.782198 | 19.610231 | 8.093000  |
| H | 32.259417 | 18.826012 | 10.531600 |
| H | 33.116610 | 17.319453 | 10.156561 |
| H | 31.458664 | 17.274800 | 10.795204 |
| H | 30.936609 | 20.456662 | 9.085640  |
| H | 28.701619 | 21.508139 | 9.113218  |
| H | 26.687839 | 20.133951 | 8.717728  |
| H | 26.796462 | 16.478530 | 7.901505  |
| H | 25.163852 | 19.038533 | 7.481582  |
| H | 24.719109 | 17.398548 | 6.999542  |
| H | 26.091569 | 18.211287 | 6.222759  |

|   |           |           |           |
|---|-----------|-----------|-----------|
| H | 26.387677 | 16.849279 | 10.344557 |
| H | 24.865890 | 16.668037 | 9.443780  |
| H | 25.414380 | 18.272137 | 9.964647  |
| H | 14.051324 | 11.609009 | 4.251912  |
| H | 12.815942 | 12.615195 | 3.548525  |
| H | 13.933251 | 14.672789 | 4.541714  |
| H | 15.790673 | 12.903857 | 2.874291  |
| H | 14.522138 | 13.930143 | 2.221679  |
| H | 15.670736 | 15.955587 | 3.177114  |
| H | 16.943125 | 14.928258 | 3.822805  |
| H | 16.260074 | 15.219057 | 0.849992  |
| H | 17.528845 | 14.191333 | 1.495973  |
| H | 17.433102 | 17.256520 | 1.776666  |
| H | 18.483401 | 16.354753 | 0.672703  |
| H | 18.712182 | 16.217401 | 2.423390  |
| H | 19.317535 | 12.727474 | 7.926569  |
| H | 19.313866 | 15.306699 | 6.986451  |
| H | 19.811003 | 17.244882 | 5.547033  |
| H | 21.903007 | 17.303673 | 4.207739  |
| H | 23.495339 | 15.398848 | 4.319254  |
| H | 23.009219 | 13.458556 | 5.756640  |
| H | 15.199640 | 13.649562 | 5.188917  |

181

[TS-D1D2] scf done: -3637.714543 / Energies= -3636.039826 / Enthalpies= -

3636.038882 / Free Energies= -3636.275156

|    |           |           |           |
|----|-----------|-----------|-----------|
| C  | 16.186403 | 16.317091 | 8.407647  |
| C  | 15.180746 | 15.577654 | 7.739716  |
| C  | 14.376181 | 16.190028 | 6.747242  |
| C  | 14.581185 | 17.543589 | 6.460427  |
| C  | 15.560532 | 18.281088 | 7.115457  |
| C  | 16.355043 | 17.664498 | 8.073669  |
| N  | 15.003904 | 14.182553 | 8.016976  |
| Mg | 16.042208 | 12.792025 | 6.935512  |
| N  | 15.065833 | 11.151515 | 7.676289  |
| C  | 14.292408 | 11.256128 | 8.756488  |
| C  | 13.952691 | 12.470034 | 9.386013  |
| C  | 14.230123 | 13.805182 | 9.037610  |
| C  | 13.603152 | 14.852737 | 9.932809  |
| C  | 13.275851 | 15.432377 | 6.015036  |
| C  | 11.882660 | 15.827290 | 6.530661  |
| C  | 17.095845 | 15.703231 | 9.463769  |
| C  | 17.019136 | 16.453034 | 10.803196 |
| C  | 15.245573 | 9.880931  | 7.040401  |
| C  | 16.446082 | 9.160824  | 7.251999  |
| C  | 16.636535 | 7.962487  | 6.556347  |
| C  | 15.682436 | 7.479752  | 5.668981  |
| C  | 14.504971 | 8.191896  | 5.475568  |
| C  | 14.257100 | 9.389821  | 6.153015  |
| C  | 17.501616 | 9.619924  | 8.249326  |
| C  | 17.413754 | 8.812995  | 9.555191  |
| C  | 12.941839 | 10.118235 | 5.906397  |
| C  | 11.723822 | 9.212952  | 6.145259  |
| C  | 18.926011 | 9.562358  | 7.683537  |
| C  | 13.670748 | 10.019549 | 9.371054  |
| C  | 12.885626 | 10.718493 | 4.494570  |
| C  | 13.344236 | 15.616496 | 4.492584  |
| C  | 18.554166 | 15.644256 | 8.984171  |
| C  | 16.572143 | 12.895882 | 4.749288  |
| C  | 16.826405 | 13.028618 | 3.240091  |
| C  | 15.687152 | 12.557764 | 2.331218  |

|    |           |           |           |
|----|-----------|-----------|-----------|
| C  | 15.993044 | 12.745778 | 0.843958  |
| C  | 14.864029 | 12.280069 | -0.076832 |
| C  | 15.175668 | 12.477814 | -1.558991 |
| Si | 18.544505 | 13.007654 | 5.651942  |
| C  | 18.936824 | 14.760334 | 5.017708  |
| C  | 17.999865 | 15.787026 | 4.829554  |
| C  | 18.386234 | 17.053622 | 4.390073  |
| C  | 19.724719 | 17.313536 | 4.100745  |
| C  | 20.675196 | 16.307640 | 4.276683  |
| C  | 20.283936 | 15.056389 | 4.750806  |
| C  | 23.364800 | 18.338039 | 7.508188  |
| C  | 24.059124 | 17.418454 | 8.522365  |
| C  | 23.055335 | 16.920610 | 9.574642  |
| C  | 25.256499 | 18.076996 | 9.192238  |
| C  | 26.522597 | 17.448657 | 9.244286  |
| C  | 27.601977 | 18.061938 | 9.921436  |
| C  | 27.393891 | 19.305809 | 10.525324 |
| C  | 26.156807 | 19.936928 | 10.472916 |
| C  | 25.100523 | 19.319841 | 9.813095  |
| N  | 26.685299 | 16.137411 | 8.693547  |
| Mg | 26.312122 | 14.564026 | 9.949651  |
| H  | 25.860153 | 14.471850 | 11.609673 |
| C  | 28.961315 | 17.388624 | 10.042090 |
| C  | 30.110984 | 18.289608 | 9.570310  |
| C  | 27.048558 | 15.988311 | 7.419880  |
| C  | 27.297598 | 17.218273 | 6.575329  |
| C  | 27.221337 | 14.744659 | 6.782088  |
| C  | 27.070449 | 13.435709 | 7.281283  |
| C  | 27.326117 | 12.309375 | 6.304592  |
| N  | 26.721223 | 13.143605 | 8.533353  |
| C  | 26.604083 | 11.776323 | 8.942143  |
| C  | 27.716446 | 11.124058 | 9.522778  |
| C  | 27.557475 | 9.815551  | 9.988997  |
| C  | 26.337036 | 9.157704  | 9.892742  |
| C  | 25.248511 | 9.812682  | 9.328932  |
| C  | 25.354308 | 11.121201 | 8.848132  |
| C  | 29.060690 | 11.818685 | 9.687122  |
| C  | 30.219564 | 11.015074 | 9.080913  |
| C  | 24.121711 | 11.813557 | 8.284799  |
| C  | 23.132592 | 12.161114 | 9.409159  |
| C  | 23.424810 | 10.995250 | 7.188971  |
| C  | 29.334915 | 12.134245 | 11.166235 |
| C  | 29.204987 | 16.906880 | 11.481271 |
| H  | 19.866285 | 12.876976 | 6.433256  |
| H  | 18.787355 | 11.780013 | 4.809980  |
| H  | 13.267134 | 15.724604 | 9.366366  |
| H  | 12.757039 | 14.439249 | 10.486446 |
| H  | 14.338095 | 15.211954 | 10.662466 |
| H  | 13.325989 | 12.356269 | 10.263973 |
| H  | 13.551314 | 10.148458 | 10.450306 |
| H  | 12.672904 | 9.849387  | 8.949208  |
| H  | 14.263031 | 9.122393  | 9.180266  |
| H  | 16.762453 | 14.674034 | 9.638626  |
| H  | 15.990904 | 16.543197 | 11.169865 |
| H  | 17.607260 | 15.928217 | 11.565258 |
| H  | 17.426331 | 17.467437 | 10.716974 |
| H  | 18.954060 | 16.651388 | 8.816475  |
| H  | 19.183263 | 15.154602 | 9.737325  |
| H  | 18.654865 | 15.091130 | 8.045979  |
| H  | 17.127552 | 18.241717 | 8.575832  |

|   |           |           |           |
|---|-----------|-----------|-----------|
| H | 15.704855 | 19.332240 | 6.878507  |
| H | 13.958895 | 18.029139 | 5.712599  |
| H | 13.410419 | 14.365125 | 6.228342  |
| H | 11.693059 | 16.894941 | 6.365291  |
| H | 11.102867 | 15.262016 | 6.005663  |
| H | 11.775183 | 15.630998 | 7.602227  |
| H | 14.334856 | 15.368687 | 4.096377  |
| H | 12.609790 | 14.968337 | 4.000017  |
| H | 13.118385 | 16.647331 | 4.195485  |
| H | 12.877060 | 10.951321 | 6.614129  |
| H | 11.751624 | 8.743789  | 7.134693  |
| H | 10.797449 | 9.794944  | 6.069594  |
| H | 11.665426 | 8.408986  | 5.402107  |
| H | 12.953527 | 9.936854  | 3.728229  |
| H | 11.941466 | 11.256021 | 4.341680  |
| H | 13.707490 | 11.420790 | 4.324039  |
| H | 13.757913 | 7.807754  | 4.784910  |
| H | 15.853820 | 6.549116  | 5.133839  |
| H | 17.550433 | 7.395993  | 6.714791  |
| H | 17.290704 | 10.665791 | 8.503066  |
| H | 17.597410 | 7.747818  | 9.368282  |
| H | 18.164861 | 9.163494  | 10.273442 |
| H | 16.429610 | 8.904438  | 10.026528 |
| H | 19.007887 | 10.102096 | 6.734927  |
| H | 19.628598 | 10.017482 | 8.390429  |
| H | 19.255667 | 8.530208  | 7.514125  |
| H | 26.427901 | 11.694130 | 6.181656  |
| H | 28.111201 | 11.641112 | 6.674599  |
| H | 27.623642 | 12.690504 | 5.325352  |
| H | 27.516492 | 14.803759 | 5.740788  |
| H | 26.391606 | 17.830325 | 6.503501  |
| H | 27.617269 | 16.950623 | 5.565876  |
| H | 28.065476 | 17.853292 | 7.030359  |
| H | 24.446435 | 12.755633 | 7.828870  |
| H | 24.110839 | 10.748511 | 6.370438  |
| H | 22.583571 | 11.560467 | 6.771566  |
| H | 23.022275 | 10.052807 | 7.578738  |
| H | 22.761593 | 11.252156 | 9.898624  |
| H | 22.269010 | 12.705114 | 9.008113  |
| H | 23.601067 | 12.778324 | 10.185450 |
| H | 24.292096 | 9.299242  | 9.264859  |
| H | 26.232914 | 8.140085  | 10.261147 |
| H | 28.405028 | 9.304801  | 10.440100 |
| H | 29.011058 | 12.772223 | 9.149490  |
| H | 30.375332 | 10.065584 | 9.606559  |
| H | 31.154328 | 11.584559 | 9.149344  |
| H | 30.041478 | 10.783707 | 8.024705  |
| H | 28.530479 | 12.734821 | 11.607035 |
| H | 30.276123 | 12.687010 | 11.276856 |
| H | 29.414818 | 11.213221 | 11.756575 |
| H | 28.953498 | 16.504601 | 9.394411  |
| H | 29.954000 | 18.640402 | 8.544025  |
| H | 31.060438 | 17.741558 | 9.599507  |
| H | 30.223116 | 19.173045 | 10.209777 |
| H | 29.242491 | 17.753487 | 12.177556 |
| H | 30.158311 | 16.368862 | 11.554273 |
| H | 28.406345 | 16.238481 | 11.824254 |
| H | 28.215534 | 19.786080 | 11.051740 |
| H | 26.014620 | 20.903389 | 10.950223 |
| H | 24.130432 | 19.810352 | 9.784421  |



|   |           |           |           |
|---|-----------|-----------|-----------|
| H | 24.422892 | 16.543382 | 7.972531  |
| H | 22.906525 | 19.207186 | 7.994896  |
| H | 22.566922 | 17.796275 | 6.986864  |
| H | 24.067916 | 18.713465 | 6.755738  |
| H | 23.526229 | 16.239449 | 10.293633 |
| H | 22.221413 | 16.392662 | 9.096788  |
| H | 22.641383 | 17.760016 | 10.146723 |
| H | 16.180427 | 11.863437 | 4.901017  |
| H | 15.723239 | 13.592445 | 4.959988  |
| H | 17.063637 | 14.074575 | 3.011532  |
| H | 15.479689 | 11.495658 | 2.528132  |
| H | 14.764398 | 13.102801 | 2.581364  |
| H | 16.205574 | 13.807572 | 0.648258  |
| H | 16.915291 | 12.201487 | 0.591240  |
| H | 13.941843 | 12.821867 | 0.178907  |
| H | 14.654782 | 11.217945 | 0.115575  |
| H | 15.356863 | 13.535349 | -1.787864 |
| H | 14.348785 | 12.137129 | -2.192934 |
| H | 16.072707 | 11.919102 | -1.853319 |
| H | 17.880272 | 12.842231 | 7.113340  |
| H | 16.947361 | 15.609610 | 5.038119  |
| H | 17.639407 | 17.835428 | 4.274638  |
| H | 20.027009 | 18.296279 | 3.745998  |
| H | 21.722241 | 16.501502 | 4.053895  |
| H | 21.039434 | 14.291723 | 4.924851  |
| H | 17.731640 | 12.455655 | 2.989883  |

181

[D2] scf done: -3637.768771 / Energies= -3636.093838 / Enthalpies= -3636.092893 /  
Free Energies= -3636.341797

|    |           |           |           |
|----|-----------|-----------|-----------|
| C  | 24.632790 | 12.751809 | 6.539821  |
| C  | 25.327088 | 12.943120 | 7.757272  |
| C  | 25.361020 | 11.923565 | 8.735947  |
| C  | 24.698831 | 10.720702 | 8.471271  |
| C  | 24.016796 | 10.518950 | 7.277249  |
| C  | 23.985296 | 11.531544 | 6.324984  |
| N  | 25.919531 | 14.216220 | 8.040265  |
| C  | 27.178242 | 14.461599 | 7.680258  |
| C  | 27.969549 | 13.379065 | 6.980872  |
| C  | 26.067417 | 12.111890 | 10.070865 |
| C  | 25.050645 | 12.222015 | 11.218056 |
| C  | 24.537191 | 13.850923 | 5.491536  |
| C  | 24.877532 | 13.360647 | 4.077680  |
| C  | 27.843973 | 15.684213 | 7.899771  |
| C  | 27.385301 | 16.876981 | 8.491280  |
| C  | 28.372140 | 18.021619 | 8.551898  |
| N  | 26.159144 | 17.049737 | 8.985834  |
| Mg | 24.726744 | 15.589692 | 8.972252  |
| C  | 25.787061 | 18.308579 | 9.557057  |
| C  | 25.182156 | 19.294564 | 8.743067  |
| C  | 24.745962 | 20.480953 | 9.340446  |
| C  | 24.894883 | 20.700761 | 10.704820 |
| C  | 25.484617 | 19.721843 | 11.495894 |
| C  | 25.937534 | 18.518187 | 10.947500 |
| C  | 24.958710 | 19.079709 | 7.252887  |
| C  | 23.468203 | 18.855521 | 6.952662  |
| C  | 26.538775 | 17.458936 | 11.859859 |
| C  | 25.456838 | 16.828330 | 12.751199 |
| C  | 25.514952 | 20.226894 | 6.398175  |
| C  | 27.695891 | 17.998743 | 12.711577 |
| C  | 27.088623 | 11.002326 | 10.358122 |

|    |           |           |           |
|----|-----------|-----------|-----------|
| C  | 23.145508 | 14.502411 | 5.516505  |
| C  | 20.144302 | 16.821522 | 2.114914  |
| C  | 19.781147 | 17.159889 | 3.417625  |
| C  | 19.253731 | 16.185921 | 4.266689  |
| C  | 19.090187 | 14.878067 | 3.812181  |
| C  | 19.454140 | 14.515067 | 2.503028  |
| C  | 19.982172 | 15.511064 | 1.665313  |
| Si | 19.240772 | 12.754405 | 1.884130  |
| C  | 17.453341 | 12.153855 | 1.942981  |
| C  | 17.267444 | 10.736840 | 1.382468  |
| C  | 15.817987 | 10.245718 | 1.431065  |
| C  | 15.634770 | 8.842729  | 0.850926  |
| C  | 14.190771 | 8.341166  | 0.904495  |
| C  | 14.017842 | 6.941050  | 0.319061  |
| Mg | 16.223667 | 12.615889 | 7.424101  |
| N  | 14.878073 | 11.301444 | 8.230544  |
| C  | 14.411947 | 10.247866 | 7.381441  |
| C  | 15.138040 | 9.036437  | 7.304265  |
| C  | 14.705724 | 8.052640  | 6.410036  |
| C  | 13.588785 | 8.246598  | 5.605588  |
| C  | 12.889157 | 9.445383  | 5.682319  |
| C  | 13.280659 | 10.460999 | 6.559892  |
| C  | 16.391005 | 8.797177  | 8.134275  |
| C  | 17.646947 | 8.850337  | 7.249331  |
| C  | 12.508322 | 11.772238 | 6.580901  |
| C  | 12.767300 | 12.577547 | 5.297584  |
| N  | 16.369448 | 13.745593 | 9.119870  |
| C  | 15.712051 | 13.469739 | 10.244153 |
| C  | 15.913291 | 14.356901 | 11.452222 |
| C  | 17.255527 | 14.870379 | 9.060113  |
| C  | 18.622255 | 14.702114 | 9.384162  |
| C  | 19.488953 | 15.787636 | 9.221347  |
| C  | 19.024815 | 17.013505 | 8.756185  |
| C  | 17.679190 | 17.167919 | 8.441994  |
| C  | 16.774193 | 16.110917 | 8.583075  |
| C  | 19.171407 | 13.366939 | 9.865661  |
| C  | 19.963253 | 12.669201 | 8.748396  |
| C  | 15.316442 | 16.314562 | 8.195195  |
| C  | 15.168595 | 16.463475 | 6.672784  |
| C  | 14.437796 | 11.386810 | 9.486893  |
| C  | 13.455228 | 10.354726 | 9.994741  |
| C  | 14.825619 | 12.384554 | 10.400816 |
| C  | 14.675683 | 17.506579 | 8.919882  |
| C  | 20.032405 | 13.501228 | 11.129474 |
| C  | 16.340237 | 7.480129  | 8.920883  |
| C  | 11.002207 | 11.569871 | 6.797307  |
| H  | 23.112150 | 15.536443 | 9.579921  |
| H  | 20.089571 | 11.819996 | 2.682153  |
| H  | 19.745622 | 12.711147 | 0.478937  |
| H  | 15.688032 | 15.401284 | 11.211335 |
| H  | 15.281823 | 14.044519 | 12.286830 |
| H  | 16.959387 | 14.332064 | 11.777926 |
| H  | 14.372616 | 12.305306 | 11.382370 |
| H  | 13.170687 | 10.551585 | 11.030571 |
| H  | 12.549318 | 10.341277 | 9.378994  |
| H  | 13.884745 | 9.348441  | 9.935644  |
| H  | 18.318430 | 12.726181 | 10.116942 |
| H  | 19.492176 | 14.015120 | 11.933175 |
| H  | 20.320147 | 12.508249 | 11.495875 |
| H  | 20.954809 | 14.059446 | 10.934756 |

|   |           |           |           |
|---|-----------|-----------|-----------|
| H | 20.843232 | 13.258681 | 8.467113  |
| H | 20.311768 | 11.682552 | 9.077610  |
| H | 19.357675 | 12.533322 | 7.843530  |
| H | 20.545032 | 15.673374 | 9.455427  |
| H | 19.713823 | 17.846516 | 8.640063  |
| H | 17.322239 | 18.128542 | 8.077219  |
| H | 14.763689 | 15.417203 | 8.495390  |
| H | 15.139776 | 18.456181 | 8.628586  |
| H | 13.608986 | 17.573610 | 8.673761  |
| H | 14.766565 | 17.413371 | 10.007987 |
| H | 15.590922 | 15.603692 | 6.139229  |
| H | 14.112151 | 16.555463 | 6.391447  |
| H | 15.690972 | 17.358021 | 6.312532  |
| H | 12.881418 | 12.364042 | 7.424144  |
| H | 10.798288 | 10.997018 | 7.708943  |
| H | 10.498297 | 12.539724 | 6.886945  |
| H | 10.538091 | 11.036508 | 5.959407  |
| H | 12.401064 | 12.038594 | 4.415301  |
| H | 12.254399 | 13.546488 | 5.336902  |
| H | 13.837253 | 12.762365 | 5.144950  |
| H | 12.021323 | 9.598408  | 5.045147  |
| H | 13.266877 | 7.467604  | 4.918956  |
| H | 15.257774 | 7.118340  | 6.339502  |
| H | 16.466290 | 9.609618  | 8.865676  |
| H | 16.333688 | 6.608259  | 8.256212  |
| H | 17.220558 | 7.390905  | 9.568636  |
| H | 15.447505 | 7.421409  | 9.553676  |
| H | 17.717745 | 9.798441  | 6.703065  |
| H | 18.554249 | 8.735703  | 7.855106  |
| H | 17.634714 | 8.045320  | 6.504377  |
| H | 27.494280 | 13.106340 | 6.031863  |
| H | 28.002273 | 12.466233 | 7.585283  |
| H | 28.992893 | 13.701221 | 6.777031  |
| H | 28.869179 | 15.714214 | 7.549133  |
| H | 27.986442 | 18.895778 | 8.015868  |
| H | 29.334030 | 17.742479 | 8.116570  |
| H | 28.535601 | 18.340402 | 9.587177  |
| H | 25.269082 | 14.624185 | 5.751027  |
| H | 25.859039 | 12.873798 | 4.043156  |
| H | 24.892734 | 14.205589 | 3.379188  |
| H | 24.136656 | 12.645009 | 3.703342  |
| H | 22.366853 | 13.777832 | 5.252010  |
| H | 23.086668 | 15.330197 | 4.800129  |
| H | 22.897603 | 14.893435 | 6.511215  |
| H | 23.441315 | 11.373632 | 5.397062  |
| H | 23.507078 | 9.577072  | 7.090029  |
| H | 24.715409 | 9.929358  | 9.217225  |
| H | 26.619270 | 13.057508 | 10.024966 |
| H | 26.605143 | 10.025396 | 10.475903 |
| H | 27.629883 | 11.214434 | 11.288102 |
| H | 27.824887 | 10.912299 | 9.551507  |
| H | 24.334259 | 13.034061 | 11.046346 |
| H | 25.559462 | 12.409273 | 12.171818 |
| H | 24.474011 | 11.294723 | 11.321136 |
| H | 26.946714 | 16.664979 | 11.224288 |
| H | 28.479571 | 18.446909 | 12.090393 |
| H | 28.148868 | 17.187875 | 13.294648 |
| H | 27.358052 | 18.763056 | 13.421455 |
| H | 25.021437 | 17.573327 | 13.428375 |
| H | 25.880110 | 16.023180 | 13.364412 |

|   |           |           |           |
|---|-----------|-----------|-----------|
| H | 24.636168 | 16.410740 | 12.155809 |
| H | 25.590641 | 19.892819 | 12.564604 |
| H | 24.548067 | 21.629554 | 11.150925 |
| H | 24.275807 | 21.244890 | 8.725461  |
| H | 25.494326 | 18.168950 | 6.962832  |
| H | 24.982214 | 21.167303 | 6.582177  |
| H | 25.406872 | 19.992732 | 5.332369  |
| H | 26.577630 | 20.403040 | 6.599620  |
| H | 23.060374 | 18.018753 | 7.532095  |
| H | 23.313453 | 18.640715 | 5.888353  |
| H | 22.879449 | 19.745465 | 7.206658  |
| H | 17.106033 | 12.197300 | 2.985599  |
| H | 16.828180 | 12.865403 | 1.383959  |
| H | 17.622262 | 10.701661 | 0.341694  |
| H | 15.466892 | 10.260255 | 2.473023  |
| H | 15.178601 | 10.953820 | 0.882636  |
| H | 15.983654 | 8.831132  | -0.192926 |
| H | 16.282051 | 8.137432  | 1.393910  |
| H | 13.542338 | 9.046508  | 0.364945  |
| H | 13.845837 | 8.349403  | 1.948261  |
| H | 14.324144 | 6.911272  | -0.734022 |
| H | 12.974407 | 6.608606  | 0.370845  |
| H | 14.628291 | 6.206972  | 0.859716  |
| H | 16.943915 | 12.721183 | 5.858975  |
| H | 18.666975 | 14.137233 | 4.489123  |
| H | 18.970209 | 16.442843 | 5.284456  |
| H | 19.906124 | 18.181076 | 3.770852  |
| H | 20.553301 | 17.577452 | 1.448151  |
| H | 20.271618 | 15.261185 | 0.646092  |
| H | 17.900655 | 10.032445 | 1.941699  |

184

[F1] scf done: -3350.704541 / Energies= -3348.970694 / Enthalpies= -3348.969750 /  
Free Energies= -3349.189792

|   |           |           |           |
|---|-----------|-----------|-----------|
| C | 22.467545 | 17.675732 | 8.121982  |
| C | 23.135182 | 16.622403 | 8.794181  |
| C | 23.588896 | 16.808577 | 10.123987 |
| C | 23.375883 | 18.043219 | 10.745531 |
| C | 22.718893 | 19.079153 | 10.093545 |
| C | 22.262238 | 18.883722 | 8.796627  |
| N | 23.417402 | 15.379066 | 8.130697  |
| C | 24.511167 | 15.372127 | 7.360537  |
| C | 25.259377 | 16.663676 | 7.080276  |
| C | 24.362732 | 15.733035 | 10.872937 |
| C | 23.865087 | 15.541157 | 12.311230 |
| C | 21.979282 | 17.552428 | 6.686214  |
| C | 20.456501 | 17.393250 | 6.639161  |
| C | 25.086593 | 14.233217 | 6.774089  |
| C | 24.918780 | 12.863686 | 7.060213  |
| C | 26.073521 | 12.018620 | 6.543437  |
| N | 23.913562 | 12.335182 | 7.755366  |
| C | 24.040402 | 10.946653 | 8.103245  |
| C | 23.582333 | 9.937584  | 7.220365  |
| C | 23.779884 | 8.597608  | 7.571543  |
| C | 24.415415 | 8.239927  | 8.753730  |
| C | 24.857614 | 9.236044  | 9.614536  |
| C | 24.684008 | 10.590951 | 9.314116  |
| C | 22.947614 | 10.245072 | 5.871199  |
| C | 21.579473 | 9.571585  | 5.717895  |
| C | 25.251606 | 11.626644 | 10.274537 |
| C | 24.692873 | 11.467411 | 11.694751 |

|    |           |           |           |
|----|-----------|-----------|-----------|
| C  | 23.854076 | 9.827274  | 4.700663  |
| C  | 26.787601 | 11.578438 | 10.305411 |
| C  | 25.872058 | 16.024243 | 10.869267 |
| C  | 22.395875 | 18.739689 | 5.803222  |
| Mg | 22.224468 | 13.593318 | 8.227351  |
| C  | 21.251603 | 13.012671 | 10.264852 |
| C  | 20.316247 | 13.147005 | 11.491031 |
| C  | 20.876711 | 12.589783 | 12.805793 |
| C  | 19.930377 | 12.758101 | 13.996007 |
| C  | 20.487507 | 12.201569 | 15.307450 |
| C  | 19.533962 | 12.372043 | 16.488437 |
| C  | 20.527124 | 13.216425 | 6.741827  |
| C  | 21.300982 | 13.888819 | 5.581980  |
| C  | 20.907015 | 13.419682 | 4.175572  |
| C  | 21.669583 | 14.127810 | 3.054244  |
| C  | 21.275874 | 13.657752 | 1.652838  |
| C  | 22.038964 | 14.372670 | 0.539526  |
| Mg | 19.473143 | 13.101951 | 8.822823  |
| N  | 17.791871 | 14.379431 | 9.215064  |
| C  | 17.654971 | 15.751228 | 8.808298  |
| C  | 17.983314 | 16.811217 | 9.689213  |
| C  | 17.786075 | 18.128333 | 9.262120  |
| C  | 17.254766 | 18.416179 | 8.011520  |
| C  | 16.931995 | 17.371887 | 7.154112  |
| C  | 17.130009 | 16.037500 | 7.523256  |
| C  | 18.525949 | 16.574013 | 11.091036 |
| C  | 20.028701 | 16.866080 | 11.152790 |
| C  | 16.711662 | 14.938217 | 6.557256  |
| C  | 17.221778 | 15.180313 | 5.131065  |
| C  | 16.776159 | 13.888417 | 9.933422  |
| C  | 16.600051 | 12.538379 | 10.278084 |
| C  | 17.176217 | 11.367524 | 9.746167  |
| C  | 16.354860 | 10.125375 | 10.057609 |
| C  | 15.668883 | 14.807117 | 10.419519 |
| N  | 18.274446 | 11.315880 | 8.994582  |
| C  | 18.569926 | 10.045550 | 8.389989  |
| C  | 18.023320 | 9.735316  | 7.120606  |
| C  | 18.268700 | 8.473474  | 6.568994  |
| C  | 19.030624 | 7.524895  | 7.238419  |
| C  | 19.565654 | 7.838478  | 8.481260  |
| C  | 19.349749 | 9.084554  | 9.080443  |
| C  | 17.128325 | 10.699182 | 6.354157  |
| C  | 17.680923 | 11.009051 | 4.956760  |
| C  | 19.901885 | 9.319024  | 10.479784 |
| C  | 21.414943 | 9.086591  | 10.542911 |
| C  | 17.799022 | 17.396375 | 12.166923 |
| C  | 15.186034 | 14.750872 | 6.548157  |
| C  | 15.690798 | 10.166337 | 6.245753  |
| C  | 19.205589 | 8.434855  | 11.528557 |
| H  | 15.269906 | 15.416999 | 9.603933  |
| H  | 14.849700 | 14.231802 | 10.855919 |
| H  | 16.037583 | 15.503413 | 11.178382 |
| H  | 15.739358 | 12.349200 | 10.910824 |
| H  | 16.098338 | 10.114057 | 11.122292 |
| H  | 15.409825 | 10.162435 | 9.503823  |
| H  | 16.855246 | 9.192341  | 9.803842  |
| H  | 18.381385 | 15.515314 | 11.329148 |
| H  | 16.710572 | 17.280617 | 12.118761 |
| H  | 18.129096 | 17.081594 | 13.164170 |
| H  | 18.019269 | 18.466547 | 12.077388 |

|   |           |           |           |
|---|-----------|-----------|-----------|
| H | 20.235512 | 17.914290 | 10.914815 |
| H | 20.421507 | 16.667184 | 12.157670 |
| H | 20.591796 | 16.255941 | 10.440063 |
| H | 18.040067 | 18.945460 | 9.932672  |
| H | 17.092348 | 19.447436 | 7.707121  |
| H | 16.509565 | 17.596282 | 6.177846  |
| H | 17.151656 | 14.001795 | 6.917151  |
| H | 14.680973 | 15.673832 | 6.237015  |
| H | 14.899026 | 13.957780 | 5.846652  |
| H | 14.805499 | 14.475895 | 7.536945  |
| H | 18.302905 | 15.350883 | 5.114822  |
| H | 17.003971 | 14.311738 | 4.498980  |
| H | 16.738869 | 16.047887 | 4.665545  |
| H | 17.091372 | 11.637960 | 6.916326  |
| H | 15.261636 | 9.952182  | 7.229517  |
| H | 15.046154 | 10.900270 | 5.746879  |
| H | 15.654743 | 9.239658  | 5.659999  |
| H | 17.733444 | 10.107103 | 4.334935  |
| H | 17.030716 | 11.725081 | 4.439519  |
| H | 18.685323 | 11.438718 | 5.010813  |
| H | 17.841065 | 8.226816  | 5.599894  |
| H | 19.203001 | 6.546356  | 6.796808  |
| H | 20.153363 | 7.092922  | 9.011180  |
| H | 19.711286 | 10.362620 | 10.750177 |
| H | 19.370548 | 7.370991  | 11.318316 |
| H | 19.611296 | 8.642601  | 12.526270 |
| H | 18.125570 | 8.603392  | 11.564353 |
| H | 21.951610 | 9.683879  | 9.801573  |
| H | 21.799323 | 9.347613  | 11.536046 |
| H | 21.669927 | 8.036341  | 10.361430 |
| H | 22.155247 | 13.596205 | 10.532751 |
| H | 21.611693 | 11.967968 | 10.236969 |
| H | 20.069784 | 14.204514 | 11.642404 |
| H | 19.345832 | 12.649927 | 11.314844 |
| H | 21.833459 | 13.085569 | 13.024939 |
| H | 21.110681 | 11.523206 | 12.673600 |
| H | 18.972043 | 12.265503 | 13.771833 |
| H | 19.697326 | 13.825876 | 14.127654 |
| H | 20.721896 | 11.135253 | 15.176740 |
| H | 21.443178 | 12.696155 | 15.533385 |
| H | 18.582070 | 11.857846 | 16.306208 |
| H | 19.960354 | 11.964654 | 17.412533 |
| H | 19.307651 | 13.431001 | 16.665212 |
| H | 25.912196 | 10.946435 | 6.642012  |
| H | 26.988957 | 12.275348 | 7.088417  |
| H | 26.256054 | 12.255523 | 5.489620  |
| H | 25.943075 | 14.441746 | 6.141572  |
| H | 24.677598 | 17.319940 | 6.426214  |
| H | 26.215342 | 16.461276 | 6.592672  |
| H | 25.449146 | 17.225364 | 7.999116  |
| H | 22.801168 | 11.328093 | 5.803902  |
| H | 24.828124 | 10.323544 | 4.730809  |
| H | 23.377696 | 10.079735 | 3.745358  |
| H | 24.030351 | 8.744611  | 4.707221  |
| H | 21.670994 | 8.479954  | 5.684161  |
| H | 21.101865 | 9.887424  | 4.782910  |
| H | 20.906678 | 9.815460  | 6.544082  |
| H | 23.440197 | 7.818899  | 6.893091  |
| H | 24.567184 | 7.192010  | 9.000920  |
| H | 25.362585 | 8.958281  | 10.536791 |

|   |           |           |           |
|---|-----------|-----------|-----------|
| H | 24.958269 | 12.615980 | 9.908510  |
| H | 27.144580 | 10.618109 | 10.697331 |
| H | 27.184274 | 12.370321 | 10.952420 |
| H | 27.218269 | 11.708912 | 9.307866  |
| H | 23.601414 | 11.537835 | 11.705230 |
| H | 25.090936 | 12.251585 | 12.350069 |
| H | 24.973990 | 10.502554 | 12.133633 |
| H | 24.214256 | 14.788842 | 10.337651 |
| H | 26.275065 | 16.059256 | 9.852194  |
| H | 26.415948 | 15.245751 | 11.418396 |
| H | 26.086189 | 16.986989 | 11.349937 |
| H | 24.083400 | 16.412565 | 12.940113 |
| H | 24.361230 | 14.678888 | 12.771496 |
| H | 22.784463 | 15.368676 | 12.342383 |
| H | 23.740339 | 18.199293 | 11.757789 |
| H | 22.565151 | 20.032810 | 10.593010 |
| H | 21.747375 | 19.693846 | 8.286265  |
| H | 22.424071 | 16.647134 | 6.260511  |
| H | 21.865129 | 19.657202 | 6.083346  |
| H | 22.149101 | 18.531400 | 4.755271  |
| H | 23.469202 | 18.950793 | 5.862925  |
| H | 20.119079 | 16.525495 | 7.213814  |
| H | 20.110008 | 17.273981 | 5.605131  |
| H | 19.957112 | 18.272505 | 7.058504  |
| H | 20.557778 | 12.124508 | 6.573708  |
| H | 19.464756 | 13.476895 | 6.560215  |
| H | 22.390543 | 13.738605 | 5.683149  |
| H | 21.157792 | 14.974816 | 5.635262  |
| H | 21.070220 | 12.334738 | 4.098042  |
| H | 19.826999 | 13.574365 | 4.038356  |
| H | 21.503495 | 15.213340 | 3.130241  |
| H | 22.750561 | 13.976973 | 3.196289  |
| H | 20.195763 | 13.807528 | 1.511595  |
| H | 21.443974 | 12.573861 | 1.574617  |
| H | 21.864861 | 15.455453 | 0.572175  |
| H | 21.733228 | 14.016591 | -0.451170 |
| H | 23.120047 | 14.210056 | 0.632319  |

199

[F2] scf done: -3873.550147 / Energies= -3871.692649 / Enthalpies= -3871.691705 /  
Free Energies= -3871.971910

|    |           |           |           |
|----|-----------|-----------|-----------|
| C  | -3.665529 | 2.252017  | 0.635903  |
| C  | -5.029019 | 1.883910  | 0.718124  |
| C  | -6.041161 | 2.781273  | 0.303770  |
| C  | -5.665121 | 4.036780  | -0.183138 |
| C  | -4.328709 | 4.410186  | -0.266208 |
| C  | -3.341855 | 3.518514  | 0.139627  |
| N  | -5.380412 | 0.561542  | 1.136225  |
| Mg | -5.476745 | -0.869894 | -0.341256 |
| N  | -5.931038 | -2.380137 | 0.980076  |
| C  | -6.102302 | -2.192418 | 2.288149  |
| C  | -5.956629 | -0.952766 | 2.940310  |
| C  | -5.609350 | 0.311284  | 2.424547  |
| C  | -5.489085 | 1.436241  | 3.428907  |
| C  | -7.517030 | 2.410406  | 0.348095  |
| C  | -8.350482 | 3.414752  | 1.156852  |
| C  | -2.550764 | 1.296481  | 1.037139  |
| C  | -1.543789 | 1.930625  | 2.006648  |
| C  | -6.065577 | -3.691515 | 0.422810  |
| C  | -4.937507 | -4.543179 | 0.355143  |
| C  | -5.069144 | -5.777591 | -0.287357 |

|    |           |           |           |
|----|-----------|-----------|-----------|
| C  | -6.276467 | -6.176742 | -0.849218 |
| C  | -7.378991 | -5.334381 | -0.772188 |
| C  | -7.299867 | -4.088305 | -0.142180 |
| C  | -3.588271 | -4.140014 | 0.934124  |
| C  | -2.997495 | -5.211939 | 1.860683  |
| C  | -8.529898 | -3.192986 | -0.099482 |
| C  | -9.740851 | -3.892751 | 0.533884  |
| C  | -2.592593 | -3.789579 | -0.182511 |
| C  | -6.474487 | -3.371382 | 3.160131  |
| C  | -8.880441 | -2.666635 | -1.499874 |
| C  | -8.088816 | 2.255375  | -1.069809 |
| C  | -1.831013 | 0.747342  | -0.204677 |
| C  | -5.306754 | -0.694288 | -2.449488 |
| C  | -4.895098 | -1.920659 | -3.277768 |
| C  | -4.884592 | -1.688556 | -4.794300 |
| C  | -4.480923 | -2.919100 | -5.608307 |
| C  | -4.474502 | -2.685484 | -7.120107 |
| C  | -4.075828 | -3.923355 | -7.921403 |
| Si | 0.418511  | 1.622475  | -6.295193 |
| C  | -0.662205 | 3.048075  | -5.738895 |
| C  | -1.577002 | 2.894979  | -4.683933 |
| C  | -2.361254 | 3.963102  | -4.250990 |
| C  | -2.245978 | 5.206848  | -4.871520 |
| C  | -1.347862 | 5.377969  | -5.924179 |
| C  | -0.564855 | 4.307300  | -6.353059 |
| C  | 2.996012  | 2.693066  | -1.341681 |
| C  | 4.280239  | 3.529442  | -1.227445 |
| C  | 4.342185  | 4.576763  | -2.347905 |
| C  | 4.404522  | 4.144932  | 0.159051  |
| C  | 5.350994  | 3.678733  | 1.101286  |
| C  | 5.417631  | 4.248422  | 2.394003  |
| C  | 4.531574  | 5.279958  | 2.718601  |
| C  | 3.598879  | 5.747630  | 1.800237  |
| C  | 3.541204  | 5.179142  | 0.533058  |
| N  | 6.182105  | 2.559317  | 0.777846  |
| Mg | 5.418939  | 0.702564  | 1.230847  |
| C  | 3.520540  | 0.153252  | 2.004908  |
| C  | 3.433251  | -0.883702 | 3.134758  |
| C  | 2.003501  | -1.225896 | 3.574199  |
| C  | 1.927096  | -2.249874 | 4.707966  |
| C  | 0.498951  | -2.587482 | 5.139902  |
| C  | 0.434431  | -3.607197 | 6.275379  |
| C  | 6.399710  | 3.746935  | 3.442902  |
| C  | 7.250316  | 4.874508  | 4.043819  |
| C  | 7.369504  | 2.756025  | 0.207648  |
| C  | 7.823554  | 4.168600  | -0.086454 |
| C  | 8.257341  | 1.723915  | -0.154359 |
| C  | 8.139283  | 0.328871  | -0.004057 |
| C  | 9.298487  | -0.500643 | -0.510403 |
| N  | 7.092179  | -0.284559 | 0.547489  |
| C  | 7.084361  | -1.710392 | 0.674341  |
| C  | 7.609836  | -2.314119 | 1.841348  |
| C  | 7.495435  | -3.699712 | 1.988382  |
| C  | 6.884739  | -4.483268 | 1.016082  |
| C  | 6.378095  | -3.880551 | -0.129118 |
| C  | 6.465653  | -2.498696 | -0.324307 |
| C  | 8.269441  | -1.499300 | 2.945420  |
| C  | 9.681347  | -2.000923 | 3.281076  |
| C  | 5.883350  | -1.886386 | -1.590465 |
| C  | 4.351609  | -2.005192 | -1.612744 |



|   |            |           |           |
|---|------------|-----------|-----------|
| C | 6.488242   | -2.495633 | -2.863764 |
| C | 7.396380   | -1.472216 | 4.209167  |
| C | 5.667045   | 2.972301  | 4.549819  |
| H | 1.670754   | 1.526537  | -5.493460 |
| H | 0.810982   | 1.809259  | -7.717947 |
| H | -4.466039  | 1.828924  | 3.446006  |
| H | -6.138722  | 2.275413  | 3.159029  |
| H | -5.748314  | 1.101508  | 4.435641  |
| H | -6.125179  | -0.977789 | 4.010804  |
| H | -5.695855  | -4.141320 | 3.127181  |
| H | -6.619416  | -3.068851 | 4.199415  |
| H | -7.394649  | -3.844604 | 2.800461  |
| H | -3.010301  | 0.446833  | 1.554467  |
| H | -2.040031  | 2.338258  | 2.894776  |
| H | -0.814068  | 1.183129  | 2.338089  |
| H | -0.982017  | 2.746085  | 1.536210  |
| H | -1.344388  | 1.555386  | -0.764202 |
| H | -1.058242  | 0.023984  | 0.082188  |
| H | -2.529090  | 0.250162  | -0.889219 |
| H | -2.296993  | 3.811660  | 0.070365  |
| H | -4.056908  | 5.393197  | -0.643199 |
| H | -6.435031  | 4.734453  | -0.505039 |
| H | -7.601084  | 1.439042  | 0.847800  |
| H | -8.361328  | 4.404737  | 0.685628  |
| H | -9.390492  | 3.074533  | 1.229884  |
| H | -7.963232  | 3.536681  | 2.174565  |
| H | -7.528476  | 1.514527  | -1.650911 |
| H | -9.138524  | 1.938712  | -1.031781 |
| H | -8.044514  | 3.204275  | -1.617960 |
| H | -8.289178  | -2.327553 | 0.528457  |
| H | -9.509756  | -4.273215 | 1.535200  |
| H | -10.581091 | -3.193634 | 0.623116  |
| H | -10.082023 | -4.740240 | -0.072311 |
| H | -9.144742  | -3.488840 | -2.175969 |
| H | -9.736675  | -1.982274 | -1.453459 |
| H | -8.037719  | -2.129867 | -1.950441 |
| H | -8.322448  | -5.648660 | -1.212698 |
| H | -6.357078  | -7.140618 | -1.345602 |
| H | -4.207470  | -6.437855 | -0.352193 |
| H | -3.737981  | -3.236098 | 1.534596  |
| H | -2.739460  | -6.126481 | 1.313953  |
| H | -2.078385  | -4.841863 | 2.330129  |
| H | -3.696611  | -5.488725 | 2.657820  |
| H | -2.973598  | -2.988951 | -0.826936 |
| H | -1.635234  | -3.460648 | 0.239958  |
| H | -2.398492  | -4.657888 | -0.823798 |
| H | 2.903446   | -0.203481 | 1.160681  |
| H | 3.021155   | 1.080839  | 2.334135  |
| H | 3.935266   | -1.817009 | 2.835759  |
| H | 3.983434   | -0.525558 | 4.020103  |
| H | 1.445517   | -1.602531 | 2.702872  |
| H | 1.494809   | -0.299648 | 3.883255  |
| H | 2.486401   | -1.871860 | 5.577724  |
| H | 2.439037   | -3.174105 | 4.398705  |
| H | -0.013591  | -1.664229 | 5.446928  |
| H | -0.059586  | -2.968798 | 4.272631  |
| H | 0.955743   | -3.239054 | 7.167908  |
| H | -0.600703  | -3.827270 | 6.562233  |
| H | 0.907696   | -4.553629 | 5.985453  |
| H | 8.957531   | -1.238941 | -1.244084 |

|   |           |           |           |
|---|-----------|-----------|-----------|
| H | 9.759410  | -1.066187 | 0.306669  |
| H | 10.064099 | 0.125104  | -0.974180 |
| H | 9.178218  | 2.056374  | -0.619602 |
| H | 7.131256  | 4.663933  | -0.776192 |
| H | 8.822907  | 4.183236  | -0.526734 |
| H | 7.834518  | 4.771609  | 0.827976  |
| H | 6.134102  | -0.819512 | -1.589312 |
| H | 7.580777  | -2.412127 | -2.873338 |
| H | 6.102101  | -1.981696 | -3.752220 |
| H | 6.236405  | -3.558114 | -2.962839 |
| H | 4.037531  | -3.055889 | -1.632049 |
| H | 3.938275  | -1.515867 | -2.503197 |
| H | 3.899166  | -1.543553 | -0.727858 |
| H | 5.901411  | -4.495161 | -0.889325 |
| H | 6.804674  | -5.559146 | 1.150282  |
| H | 7.889977  | -4.173515 | 2.884404  |
| H | 8.364149  | -0.467916 | 2.588486  |
| H | 9.661915  | -3.011133 | 3.706674  |
| H | 10.153274 | -1.342370 | 4.020167  |
| H | 10.324506 | -2.028978 | 2.394381  |
| H | 6.393725  | -1.084086 | 3.998375  |
| H | 7.852625  | -0.841644 | 4.982330  |
| H | 7.274382  | -2.479257 | 4.626056  |
| H | 7.085661  | 3.049309  | 2.949720  |
| H | 7.780237  | 5.437873  | 3.267523  |
| H | 7.997801  | 4.461842  | 4.732079  |
| H | 6.640154  | 5.586433  | 4.611866  |
| H | 4.967803  | 3.623544  | 5.088243  |
| H | 6.379284  | 2.566532  | 5.278868  |
| H | 5.084829  | 2.138578  | 4.139656  |
| H | 4.571254  | 5.722554  | 3.711201  |
| H | 2.918027  | 6.550600  | 2.071695  |
| H | 2.807110  | 5.543532  | -0.181869 |
| H | 5.129337  | 2.851237  | -1.368014 |
| H | 3.482053  | 5.255903  | -2.318939 |
| H | 4.336008  | 4.084660  | -3.327742 |
| H | 5.249599  | 5.187721  | -2.281542 |
| H | 2.951612  | 1.914337  | -0.571422 |
| H | 2.934250  | 2.208963  | -2.323929 |
| H | 2.106004  | 3.322646  | -1.222047 |
| H | -6.283314 | -0.336672 | -2.824023 |
| H | -4.615443 | 0.136544  | -2.672683 |
| H | -3.891537 | -2.260928 | -2.976631 |
| H | -5.884999 | -1.354050 | -5.110038 |
| H | -4.202127 | -0.856196 | -5.025076 |
| H | -3.481161 | -3.253723 | -5.290896 |
| H | -5.164782 | -3.749415 | -5.373779 |
| H | -3.787759 | -1.859705 | -7.355488 |
| H | -5.471909 | -2.348570 | -7.437722 |
| H | -3.069077 | -4.263965 | -7.648634 |
| H | -4.078810 | -3.724858 | -8.999739 |
| H | -4.766153 | -4.755470 | -7.734216 |
| H | -0.304865 | 0.331453  | -6.151766 |
| H | -1.688312 | 1.928587  | -4.195646 |
| H | -3.062126 | 3.823000  | -3.431755 |
| H | -2.859912 | 6.040380  | -4.538750 |
| H | -1.260225 | 6.344398  | -6.414928 |
| H | 0.125495  | 4.455362  | -7.181611 |
| H | -5.562987 | -2.769072 | -3.062625 |

[TS-F2F3] scf done: -3873.493039 / Energies= -3871.636157 / Enthalpies= -3871.635213 / Free Energies= -3871.883268

|    |           |           |           |
|----|-----------|-----------|-----------|
| C  | 17.616554 | 16.958531 | 9.242003  |
| C  | 16.755336 | 15.989734 | 8.672217  |
| C  | 15.888293 | 16.335782 | 7.605203  |
| C  | 15.905274 | 17.649578 | 7.126257  |
| C  | 16.759287 | 18.604428 | 7.666791  |
| C  | 17.602060 | 18.253844 | 8.713084  |
| N  | 16.792174 | 14.626846 | 9.113621  |
| Mg | 17.851605 | 13.246914 | 8.016490  |
| N  | 17.067899 | 11.597006 | 8.950223  |
| C  | 16.477311 | 11.719415 | 10.144192 |
| C  | 16.137575 | 12.943930 | 10.742905 |
| C  | 16.186837 | 14.263075 | 10.242980 |
| C  | 15.477291 | 15.284775 | 11.108437 |
| C  | 14.900671 | 15.333820 | 7.022858  |
| C  | 13.543325 | 15.430538 | 7.738333  |
| C  | 18.543382 | 16.660775 | 10.413207 |
| C  | 18.258276 | 17.582160 | 11.611021 |
| C  | 17.057234 | 10.320399 | 8.293889  |
| C  | 18.168339 | 9.450217  | 8.369474  |
| C  | 18.139150 | 8.261160  | 7.631750  |
| C  | 17.045612 | 7.917688  | 6.847891  |
| C  | 15.947079 | 8.768002  | 6.800159  |
| C  | 15.925508 | 9.970828  | 7.512077  |
| C  | 19.384544 | 9.742783  | 9.235020  |
| C  | 19.581188 | 8.668552  | 10.316328 |
| C  | 14.673853 | 10.838986 | 7.444092  |
| C  | 13.462142 | 10.129632 | 8.069860  |
| C  | 20.660052 | 9.875482  | 8.392878  |
| C  | 16.125982 | 10.476605 | 10.931604 |
| C  | 14.345796 | 11.274910 | 6.009235  |
| C  | 14.714116 | 15.466500 | 5.506698  |
| C  | 20.021070 | 16.770912 | 10.017373 |
| C  | 18.174770 | 13.008071 | 5.866819  |
| C  | 18.668929 | 12.519927 | 4.496437  |
| C  | 17.572958 | 11.964010 | 3.580917  |
| C  | 18.098371 | 11.508619 | 2.218063  |
| C  | 17.010387 | 10.951473 | 1.298779  |
| C  | 17.540911 | 10.501514 | -0.060993 |
| Si | 20.273383 | 13.832569 | 6.675342  |
| C  | 20.137277 | 15.213271 | 5.395829  |
| C  | 19.054637 | 16.099518 | 5.312343  |
| C  | 19.006867 | 17.084336 | 4.325698  |
| C  | 20.032979 | 17.187238 | 3.387225  |
| C  | 21.123370 | 16.320070 | 3.460410  |
| C  | 21.180600 | 15.356369 | 4.466768  |
| C  | 21.804794 | 18.152253 | 6.827452  |
| C  | 23.335733 | 18.223931 | 6.873482  |
| C  | 23.822032 | 19.444878 | 6.076673  |
| C  | 23.840535 | 18.232730 | 8.308392  |
| C  | 24.600946 | 17.175450 | 8.858804  |
| C  | 25.046724 | 17.244829 | 10.204599 |
| C  | 24.721009 | 18.372154 | 10.963833 |
| C  | 23.969262 | 19.413709 | 10.431432 |
| C  | 23.535975 | 19.335214 | 9.115163  |
| N  | 24.908445 | 16.002839 | 8.095037  |
| Mg | 23.731425 | 14.268365 | 8.387101  |
| C  | 22.915000 | 14.062232 | 10.351806 |
| C  | 21.729772 | 13.186189 | 10.767277 |

|   |           |           |           |
|---|-----------|-----------|-----------|
| C | 21.383025 | 13.267867 | 12.261389 |
| C | 20.201804 | 12.400011 | 12.697845 |
| C | 19.877522 | 12.507816 | 14.189269 |
| C | 18.698958 | 11.636918 | 14.619832 |
| C | 25.910447 | 16.151449 | 10.819530 |
| C | 27.406246 | 16.472990 | 10.667177 |
| C | 25.985725 | 16.009085 | 7.314081  |
| C | 26.744101 | 17.298079 | 7.059577  |
| C | 26.518754 | 14.876053 | 6.669400  |
| C | 26.171004 | 13.513736 | 6.744092  |
| C | 27.228368 | 12.580063 | 6.177633  |
| N | 25.063603 | 13.025991 | 7.305794  |
| C | 24.900538 | 11.602874 | 7.319865  |
| C | 25.400508 | 10.839001 | 8.400567  |
| C | 25.259847 | 9.446924  | 8.364334  |
| C | 24.643531 | 8.809947  | 7.297247  |
| C | 24.125421 | 9.571310  | 6.254534  |
| C | 24.227129 | 10.965817 | 6.244707  |
| C | 26.090018 | 11.467312 | 9.603526  |
| C | 27.552109 | 11.014125 | 9.736578  |
| C | 23.616627 | 11.762709 | 5.094952  |
| C | 22.449305 | 11.034930 | 4.416871  |
| C | 24.633927 | 12.163072 | 4.012314  |
| C | 25.328105 | 11.167082 | 10.902885 |
| C | 25.581839 | 15.869563 | 12.290567 |
| H | 21.707563 | 14.270742 | 7.219160  |
| H | 20.705366 | 12.454571 | 6.348583  |
| H | 15.268552 | 16.212479 | 10.573240 |
| H | 14.537233 | 14.872177 | 11.486347 |
| H | 16.096718 | 15.530109 | 11.979052 |
| H | 15.661882 | 12.857015 | 11.714024 |
| H | 17.042980 | 10.008853 | 11.308242 |
| H | 15.488220 | 10.711053 | 11.786509 |
| H | 15.624399 | 9.731214  | 10.309005 |
| H | 18.368163 | 15.629101 | 10.735672 |
| H | 17.203222 | 17.566753 | 11.903792 |
| H | 18.858823 | 17.274015 | 12.474884 |
| H | 18.522014 | 18.621938 | 11.384698 |
| H | 20.272191 | 17.784473 | 9.685970  |
| H | 20.664348 | 16.531840 | 10.871016 |
| H | 20.276330 | 16.080244 | 9.208441  |
| H | 18.265643 | 19.003663 | 9.136471  |
| H | 16.762685 | 19.619284 | 7.277111  |
| H | 15.235787 | 17.931190 | 6.318267  |
| H | 15.290305 | 14.326829 | 7.220810  |
| H | 13.106136 | 16.427653 | 7.604762  |
| H | 12.838752 | 14.694274 | 7.332614  |
| H | 13.641049 | 15.248585 | 8.813225  |
| H | 15.672762 | 15.464550 | 4.976467  |
| H | 14.116057 | 14.629752 | 5.128748  |
| H | 14.183667 | 16.387607 | 5.237752  |
| H | 14.859529 | 11.745825 | 8.029108  |
| H | 13.650236 | 9.842267  | 9.109578  |
| H | 12.584952 | 10.788031 | 8.056383  |
| H | 13.203389 | 9.219530  | 7.515408  |
| H | 14.133592 | 10.414136 | 5.364099  |
| H | 13.457331 | 11.918324 | 6.001182  |
| H | 15.173936 | 11.830433 | 5.557925  |
| H | 15.083500 | 8.490070  | 6.200166  |
| H | 17.044681 | 6.987820  | 6.284527  |

|   |           |           |           |
|---|-----------|-----------|-----------|
| H | 18.991663 | 7.587806  | 7.680649  |
| H | 19.214550 | 10.698939 | 9.743852  |
| H | 19.823809 | 7.696481  | 9.870549  |
| H | 20.409642 | 8.944165  | 10.979079 |
| H | 18.683924 | 8.534186  | 10.929840 |
| H | 20.559047 | 10.649319 | 7.625665  |
| H | 21.516909 | 10.137347 | 9.022833  |
| H | 20.900770 | 8.935163  | 7.883128  |
| H | 22.688956 | 15.104404 | 10.641633 |
| H | 23.775160 | 13.791858 | 10.989898 |
| H | 20.833877 | 13.462218 | 10.187624 |
| H | 21.923783 | 12.131125 | 10.515178 |
| H | 21.176801 | 14.318409 | 12.518948 |
| H | 22.273459 | 12.987612 | 12.845100 |
| H | 20.412508 | 11.347735 | 12.451336 |
| H | 19.308109 | 12.675136 | 12.115684 |
| H | 20.767903 | 12.233697 | 14.773149 |
| H | 19.666167 | 13.558218 | 14.437185 |
| H | 18.896527 | 10.576350 | 14.418942 |
| H | 18.490788 | 11.738272 | 15.691621 |
| H | 17.786358 | 11.911292 | 14.075605 |
| H | 26.821258 | 11.633464 | 5.820333  |
| H | 27.960089 | 12.347527 | 6.960651  |
| H | 27.772008 | 13.064193 | 5.361448  |
| H | 27.422387 | 15.071418 | 6.101998  |
| H | 26.275287 | 17.842695 | 6.231377  |
| H | 27.780184 | 17.095022 | 6.776735  |
| H | 26.736538 | 17.961896 | 7.926968  |
| H | 23.225250 | 12.691927 | 5.531405  |
| H | 25.380579 | 12.868417 | 4.382234  |
| H | 24.115787 | 12.642011 | 3.171764  |
| H | 25.155014 | 11.280020 | 3.621970  |
| H | 22.799156 | 10.200370 | 3.796238  |
| H | 21.916908 | 11.725169 | 3.753405  |
| H | 21.731279 | 10.640653 | 5.142831  |
| H | 23.626548 | 9.066490  | 5.432913  |
| H | 24.555616 | 7.726236  | 7.279553  |
| H | 25.651306 | 8.853575  | 9.187649  |
| H | 26.089119 | 12.553362 | 9.460165  |
| H | 27.618656 | 9.935329  | 9.923644  |
| H | 28.035544 | 11.526143 | 10.577530 |
| H | 28.131615 | 11.227340 | 8.832736  |
| H | 24.285980 | 11.491977 | 10.836282 |
| H | 25.792963 | 11.688373 | 11.748589 |
| H | 25.336198 | 10.093915 | 11.130338 |
| H | 25.717295 | 15.229206 | 10.260006 |
| H | 27.697690 | 16.563903 | 9.616467  |
| H | 28.017331 | 15.680057 | 11.116663 |
| H | 27.654289 | 17.416354 | 11.169834 |
| H | 25.880605 | 16.696386 | 12.946662 |
| H | 26.127643 | 14.980468 | 12.628295 |
| H | 24.512850 | 15.684317 | 12.432550 |
| H | 25.063349 | 18.437860 | 11.992980 |
| H | 23.727227 | 20.282159 | 11.039631 |
| H | 22.952059 | 20.151789 | 8.696099  |
| H | 23.724195 | 17.323769 | 6.384202  |
| H | 23.381139 | 20.372915 | 6.460547  |
| H | 23.525682 | 19.353073 | 5.024654  |
| H | 24.910366 | 19.559337 | 6.116548  |
| H | 21.433226 | 17.262990 | 7.343339  |

|   |           |           |           |
|---|-----------|-----------|-----------|
| H | 21.448229 | 18.113888 | 5.793042  |
| H | 21.356196 | 19.031186 | 7.307187  |
| H | 17.637246 | 12.110865 | 6.258238  |
| H | 17.384230 | 13.760572 | 5.677827  |
| H | 19.178037 | 13.338830 | 3.973128  |
| H | 17.076910 | 11.118152 | 4.079194  |
| H | 16.799050 | 12.732330 | 3.432031  |
| H | 18.596204 | 12.353645 | 1.718948  |
| H | 18.874659 | 10.742466 | 2.364727  |
| H | 16.233347 | 11.716003 | 1.153662  |
| H | 16.514362 | 10.105900 | 1.796870  |
| H | 18.011763 | 11.334364 | -0.597858 |
| H | 16.738239 | 10.108391 | -0.695780 |
| H | 18.294941 | 9.712137  | 0.048536  |
| H | 19.693967 | 14.041350 | 8.082205  |
| H | 18.237093 | 16.037692 | 6.026293  |
| H | 18.164261 | 17.770636 | 4.292752  |
| H | 19.988629 | 17.944894 | 2.608523  |
| H | 21.933377 | 16.398088 | 2.738902  |
| H | 22.051390 | 14.705164 | 4.524221  |
| H | 19.425152 | 11.737803 | 4.647846  |

199

[F3] scf done: -3873.495376 / Energies= -3871.637919 / Enthalpies= -3871.636975 /  
Free Energies= -3871.881773

|    |           |           |           |
|----|-----------|-----------|-----------|
| C  | -4.473978 | 2.667745  | -0.364939 |
| C  | -3.697312 | 2.297691  | 0.761383  |
| C  | -2.859697 | 3.240213  | 1.403365  |
| C  | -2.796858 | 4.535786  | 0.878886  |
| C  | -3.542321 | 4.908002  | -0.232200 |
| C  | -4.380027 | 3.979320  | -0.839674 |
| N  | -3.717217 | 0.930557  | 1.190522  |
| C  | -4.405141 | 0.556812  | 2.268483  |
| C  | -4.493420 | -0.769926 | 2.739443  |
| C  | -4.131457 | -1.986601 | 2.134964  |
| C  | -4.621361 | -3.229809 | 2.845842  |
| C  | -2.036504 | 2.905881  | 2.639622  |
| C  | -2.354924 | 3.851553  | 3.809124  |
| C  | -5.458397 | 1.697725  | -1.004576 |
| C  | -6.860435 | 1.872700  | -0.397322 |
| Mg | -2.563934 | -0.432339 | 0.199800  |
| N  | -3.454775 | -2.097336 | 0.986165  |
| C  | -3.431318 | -3.361644 | 0.308708  |
| C  | -2.258050 | -4.152996 | 0.314771  |
| C  | -2.243486 | -5.333816 | -0.436440 |
| C  | -3.346224 | -5.737100 | -1.177667 |
| C  | -4.500480 | -4.963004 | -1.160244 |
| C  | -4.574375 | -3.779075 | -0.420759 |
| C  | -1.036859 | -3.800756 | 1.151422  |
| C  | -0.938981 | -4.710409 | 2.387094  |
| C  | -5.878964 | -2.990131 | -0.438429 |
| C  | -7.086622 | -3.858786 | -0.052689 |
| C  | 0.268788  | -3.867209 | 0.350538  |
| C  | -6.122571 | -2.332630 | -1.803858 |
| C  | -5.157517 | 1.576542  | 3.097512  |
| C  | -0.531453 | 2.923434  | 2.346963  |
| C  | -5.530725 | 1.805543  | -2.532370 |
| C  | -2.034238 | -0.663978 | -2.060079 |
| C  | -1.896382 | -1.072051 | -3.537995 |
| C  | -3.081140 | -1.837747 | -4.130711 |
| C  | -2.853619 | -2.245292 | -5.587744 |

|    |           |           |           |
|----|-----------|-----------|-----------|
| C  | -4.033206 | -2.998995 | -6.203936 |
| C  | -3.796849 | -3.400396 | -7.658524 |
| Si | -0.211788 | 0.050042  | -1.405509 |
| C  | -0.071375 | 1.449758  | -2.686754 |
| C  | -1.156091 | 2.230945  | -3.112477 |
| C  | -1.005939 | 3.205373  | -4.099555 |
| C  | 0.235015  | 3.399503  | -4.705362 |
| C  | 1.328186  | 2.636167  | -4.295058 |
| C  | 1.176580  | 1.689681  | -3.281963 |
| C  | 0.925517  | 4.416009  | -0.907545 |
| C  | 2.455850  | 4.511102  | -0.898469 |
| C  | 2.897049  | 5.771585  | -1.659568 |
| C  | 3.003582  | 4.472583  | 0.519924  |
| C  | 3.809920  | 3.415486  | 1.001820  |
| C  | 4.300958  | 3.448370  | 2.333857  |
| C  | 3.973536  | 4.537175  | 3.146533  |
| C  | 3.175898  | 5.576861  | 2.681532  |
| C  | 2.698693  | 5.535130  | 1.378978  |
| N  | 4.125339  | 2.281217  | 0.186242  |
| Mg | 2.980324  | 0.496833  | 0.411673  |
| C  | 2.284144  | 0.230529  | 2.425893  |
| C  | 1.088167  | -0.601796 | 2.898722  |
| C  | 0.835864  | -0.537391 | 4.412881  |
| C  | -0.381497 | -1.324571 | 4.900515  |
| C  | -0.610916 | -1.230593 | 6.410321  |
| C  | -1.834344 | -2.009801 | 6.889199  |
| C  | 5.215266  | 2.357144  | 2.875569  |
| C  | 6.695970  | 2.720126  | 2.674723  |
| C  | 5.185149  | 2.346417  | -0.614673 |
| C  | 5.889609  | 3.669872  | -0.850856 |
| C  | 5.751926  | 1.250571  | -1.294652 |
| C  | 5.476233  | -0.129780 | -1.230360 |
| C  | 6.590608  | -0.999427 | -1.791620 |
| N  | 4.395044  | -0.681100 | -0.678244 |
| C  | 4.316171  | -2.111643 | -0.680725 |
| C  | 3.723360  | -2.781658 | -1.784113 |
| C  | 3.717007  | -4.179921 | -1.791657 |
| C  | 4.251139  | -4.917731 | -0.740362 |
| C  | 4.784983  | -4.252782 | 0.353800  |
| C  | 4.827896  | -2.854836 | 0.409378  |
| C  | 3.097418  | -2.019363 | -2.948491 |
| C  | 1.963333  | -2.795267 | -3.630685 |
| C  | 5.433281  | -2.198114 | 1.641992  |
| C  | 6.929362  | -2.514968 | 1.792653  |
| C  | 4.682965  | -2.606679 | 2.918025  |
| C  | 4.108799  | -1.592628 | -4.026637 |
| C  | 4.954516  | 2.019507  | 4.348359  |
| H  | 1.184200  | 0.532261  | -0.692640 |
| H  | 0.379689  | -1.292005 | -1.677658 |
| H  | -5.351902 | 2.496986  | 2.544104  |
| H  | -6.107460 | 1.159556  | 3.443915  |
| H  | -4.573004 | 1.839406  | 3.987120  |
| H  | -5.033732 | -0.875896 | 3.674793  |
| H  | -3.977173 | -4.090115 | 2.654265  |
| H  | -4.673048 | -3.053922 | 3.923707  |
| H  | -5.629673 | -3.494371 | 2.506863  |
| H  | -2.293411 | 1.889302  | 2.955230  |
| H  | -3.428303 | 3.898162  | 4.022831  |
| H  | -1.838496 | 3.515951  | 4.716049  |
| H  | -2.015536 | 4.872910  | 3.601022  |

|   |           |           |           |
|---|-----------|-----------|-----------|
| H | -0.194730 | 3.917321  | 2.033270  |
| H | 0.035452  | 2.648350  | 3.242816  |
| H | -0.263902 | 2.214132  | 1.557739  |
| H | -2.148190 | 5.266587  | 1.354986  |
| H | -3.476307 | 5.920996  | -0.620956 |
| H | -4.976451 | 4.281761  | -1.696147 |
| H | -5.132050 | 0.679234  | -0.756743 |
| H | -7.238208 | 2.885021  | -0.585632 |
| H | -7.566134 | 1.159026  | -0.839809 |
| H | -6.852748 | 1.713803  | 0.685572  |
| H | -4.541882 | 1.730959  | -2.998507 |
| H | -6.155372 | 1.000147  | -2.935341 |
| H | -5.980250 | 2.751859  | -2.855053 |
| H | -5.803581 | -2.184676 | 0.298642  |
| H | -6.927620 | -4.384653 | 0.894925  |
| H | -7.983951 | -3.236771 | 0.049165  |
| H | -7.299786 | -4.616343 | -0.815864 |
| H | -6.198895 | -3.084285 | -2.598593 |
| H | -7.057660 | -1.758855 | -1.793450 |
| H | -5.307563 | -1.653316 | -2.072339 |
| H | -5.367118 | -5.286710 | -1.731660 |
| H | -3.310698 | -6.655855 | -1.757811 |
| H | -1.349263 | -5.951547 | -0.433133 |
| H | -1.157679 | -2.772865 | 1.515916  |
| H | -0.838586 | -5.761086 | 2.088395  |
| H | -0.060414 | -4.445046 | 2.986221  |
| H | -1.821525 | -4.627605 | 3.029824  |
| H | 0.217568  | -3.263575 | -0.560398 |
| H | 1.104090  | -3.492990 | 0.951245  |
| H | 0.515921  | -4.894264 | 0.058338  |
| H | 2.113038  | 1.274677  | 2.746985  |
| H | 3.164846  | -0.082155 | 3.013957  |
| H | 0.170968  | -0.271656 | 2.382369  |
| H | 1.215032  | -1.659338 | 2.615021  |
| H | 0.725746  | 0.518231  | 4.705953  |
| H | 1.735351  | -0.898387 | 4.935065  |
| H | -0.269603 | -2.383043 | 4.619833  |
| H | -1.282838 | -0.967240 | 4.377427  |
| H | 0.283962  | -1.595549 | 6.934469  |
| H | -0.716120 | -0.173336 | 6.694096  |
| H | -1.742326 | -3.076882 | 6.650187  |
| H | -1.971290 | -1.923072 | 7.973662  |
| H | -2.749612 | -1.641769 | 6.407808  |
| H | 6.242257  | -1.961954 | -2.167511 |
| H | 7.319413  | -1.203419 | -0.998056 |
| H | 7.122893  | -0.476758 | -2.591467 |
| H | 6.639024  | 1.496534  | -1.868317 |
| H | 5.361271  | 4.233019  | -1.629028 |
| H | 6.916263  | 3.515288  | -1.192363 |
| H | 5.904644  | 4.296334  | 0.044040  |
| H | 2.666318  | -1.102968 | -2.526425 |
| H | 4.824043  | -0.854516 | -3.658452 |
| H | 3.579659  | -1.143619 | -4.876564 |
| H | 4.668760  | -2.458568 | -4.401581 |
| H | 2.346474  | -3.625911 | -4.236725 |
| H | 1.419223  | -2.129168 | -4.309654 |
| H | 1.249492  | -3.203527 | -2.908124 |
| H | 3.282356  | -4.706461 | -2.636155 |
| H | 4.239777  | -6.004677 | -0.772495 |
| H | 5.189652  | -4.828140 | 1.183528  |



|   |           |           |           |
|---|-----------|-----------|-----------|
| H | 5.331254  | -1.113386 | 1.527170  |
| H | 7.094080  | -3.588692 | 1.946071  |
| H | 7.345509  | -1.988432 | 2.660261  |
| H | 7.503077  | -2.216196 | 0.909777  |
| H | 3.615131  | -2.384918 | 2.838513  |
| H | 5.078113  | -2.063228 | 3.784789  |
| H | 4.794555  | -3.679000 | 3.121070  |
| H | 5.019385  | 1.450334  | 2.292774  |
| H | 6.943707  | 2.848797  | 1.616835  |
| H | 7.342473  | 1.929222  | 3.075673  |
| H | 6.942143  | 3.653823  | 3.196277  |
| H | 5.259002  | 2.832415  | 5.019278  |
| H | 5.535930  | 1.134687  | 4.634187  |
| H | 3.897287  | 1.800861  | 4.526186  |
| H | 4.351695  | 4.573772  | 4.164541  |
| H | 2.933342  | 6.415134  | 3.330608  |
| H | 2.080381  | 6.350857  | 1.010566  |
| H | 2.843172  | 3.637591  | -1.433873 |
| H | 2.447905  | 6.674873  | -1.228783 |
| H | 2.574190  | 5.712383  | -2.706031 |
| H | 3.983474  | 5.907980  | -1.643450 |
| H | 0.582208  | 3.497049  | -0.425426 |
| H | 0.544226  | 4.419992  | -1.933867 |
| H | 0.475592  | 5.264119  | -0.376096 |
| H | -2.291704 | -1.620628 | -1.545852 |
| H | -2.927522 | -0.000733 | -1.993534 |
| H | -1.711942 | -0.172616 | -4.136299 |
| H | -3.281143 | -2.734923 | -3.527003 |
| H | -3.986373 | -1.215623 | -4.067937 |
| H | -2.643692 | -1.347380 | -6.188364 |
| H | -1.950818 | -2.870819 | -5.652568 |
| H | -4.936015 | -2.374540 | -6.138238 |
| H | -4.240853 | -3.897310 | -5.604831 |
| H | -3.622414 | -2.519956 | -8.289295 |
| H | -4.657004 | -3.940052 | -8.071370 |
| H | -2.919146 | -4.051756 | -7.752119 |
| H | -0.779497 | 0.228839  | 0.071808  |
| H | -2.136717 | 2.093420  | -2.662610 |
| H | -1.859444 | 3.809642  | -4.398401 |
| H | 0.351599  | 4.146662  | -5.486792 |
| H | 2.301999  | 2.784924  | -4.755872 |
| H | 2.048516  | 1.129597  | -2.948329 |
| H | -0.991780 | -1.689137 | -3.633186 |

199

[TS-F3F4] scf done: -3873.494407 / Energies= -3871.638248 / Enthalpies= -3871.637304 / Free Energies= -3871.881527

|   |          |           |           |
|---|----------|-----------|-----------|
| C | 3.930277 | -2.840244 | -1.604064 |
| C | 4.495089 | -2.041394 | -0.574788 |
| C | 5.106569 | -2.656149 | 0.544417  |
| C | 5.189495 | -4.052483 | 0.587166  |
| C | 4.680168 | -4.840484 | -0.434730 |
| C | 4.048068 | -4.230740 | -1.512322 |
| N | 4.440698 | -0.610653 | -0.666280 |
| C | 5.439443 | 0.008454  | -1.294574 |
| C | 6.603099 | -0.774371 | -1.884144 |
| C | 5.694969 | -1.863032 | 1.703029  |
| C | 5.101932 | -2.303161 | 3.049376  |
| C | 3.207325 | -2.230854 | -2.800673 |
| C | 4.139875 | -1.904366 | -3.978885 |
| C | 5.589486 | 1.405671  | -1.420912 |

|    |           |           |           |
|----|-----------|-----------|-----------|
| C  | 4.980963  | 2.472963  | -0.732168 |
| C  | 5.575838  | 3.839297  | -1.017804 |
| N  | 3.969539  | 2.347971  | 0.123411  |
| Mg | 2.980566  | 0.499684  | 0.430857  |
| C  | 2.325421  | 0.159422  | 2.439949  |
| C  | 1.250860  | -0.831353 | 2.897032  |
| C  | 1.018787  | -0.849860 | 4.415592  |
| C  | -0.062787 | -1.820007 | 4.892891  |
| C  | -0.263634 | -1.822183 | 6.409665  |
| C  | -1.349353 | -2.788682 | 6.879109  |
| C  | 3.601634  | 3.472055  | 0.931062  |
| C  | 2.703756  | 4.457552  | 0.458794  |
| C  | 2.349293  | 5.511275  | 1.309342  |
| C  | 2.864030  | 5.612166  | 2.594728  |
| C  | 3.749278  | 4.641945  | 3.050669  |
| C  | 4.130061  | 3.564766  | 2.245266  |
| C  | 2.103050  | 4.417443  | -0.936997 |
| C  | 2.365962  | 5.708469  | -1.727890 |
| C  | 5.140157  | 2.555185  | 2.773921  |
| C  | 4.930045  | 2.199459  | 4.250607  |
| C  | 0.595761  | 4.140483  | -0.884546 |
| C  | 6.581143  | 3.042344  | 2.549286  |
| C  | 7.227585  | -1.964789 | 1.748934  |
| C  | 2.061200  | -3.111955 | -3.314987 |
| C  | 0.288576  | 1.216906  | -2.923302 |
| C  | -0.685594 | 1.886492  | -3.680203 |
| C  | -0.338527 | 2.772608  | -4.701065 |
| C  | 1.003728  | 2.991802  | -5.006522 |
| C  | 1.991507  | 2.335369  | -4.271710 |
| C  | 1.632910  | 1.477330  | -3.232936 |
| Si | -0.118367 | -0.020263 | -1.520673 |
| C  | -1.880140 | -0.663358 | -2.175725 |
| C  | -1.815469 | -1.281609 | -3.581494 |
| C  | -3.112051 | -1.899059 | -4.107618 |
| C  | -2.949931 | -2.524632 | -5.494572 |
| C  | -4.238288 | -3.138193 | -6.044828 |
| C  | -4.064174 | -3.762149 | -7.428110 |
| Mg | -2.619410 | -0.338448 | 0.308359  |
| N  | -3.667490 | -1.978599 | 0.946844  |
| C  | -3.701472 | -3.210535 | 0.211550  |
| C  | -2.596711 | -4.093341 | 0.241983  |
| C  | -2.631604 | -5.236049 | -0.565671 |
| C  | -3.719768 | -5.516743 | -1.380928 |
| C  | -4.811531 | -4.656009 | -1.382775 |
| C  | -4.833826 | -3.503762 | -0.591412 |
| C  | -1.402567 | -3.885327 | 1.162021  |
| C  | -0.066951 | -3.919693 | 0.409110  |
| C  | -6.074304 | -2.617851 | -0.625309 |
| C  | -6.196770 | -1.863798 | -1.956073 |
| N  | -3.757746 | 1.045070  | 1.294063  |
| C  | -4.523724 | 0.664301  | 2.316406  |
| C  | -5.264175 | 1.697489  | 3.138761  |
| C  | -3.661357 | 2.433740  | 0.950032  |
| C  | -2.834281 | 3.302803  | 1.700156  |
| C  | -2.731079 | 4.636263  | 1.291272  |
| C  | -3.418812 | 5.112850  | 0.182335  |
| C  | -4.226815 | 4.248962  | -0.546922 |
| C  | -4.361156 | 2.904561  | -0.187256 |
| C  | -2.037262 | 2.837962  | 2.910956  |
| C  | -0.545805 | 2.705249  | 2.577053  |

|   |           |           |           |
|---|-----------|-----------|-----------|
| C | -5.295313 | 2.002065  | -0.981293 |
| C | -5.229354 | 2.237913  | -2.495085 |
| C | -4.385565 | -1.880510 | 2.072253  |
| C | -4.972919 | -3.126511 | 2.699528  |
| C | -4.705994 | -0.674947 | 2.720582  |
| C | -6.744517 | 2.138408  | -0.486345 |
| C | -2.224824 | 3.756759  | 4.127919  |
| C | -1.392647 | -4.926631 | 2.293543  |
| C | -7.361415 | -3.411405 | -0.351294 |
| H | 1.088317  | 0.555817  | -0.627594 |
| H | 0.525743  | -1.363288 | -1.635118 |
| H | -5.626966 | 2.521051  | 2.518345  |
| H | -6.110793 | 1.244002  | 3.659580  |
| H | -4.601273 | 2.133792  | 3.894405  |
| H | -5.292641 | -0.794768 | 3.625011  |
| H | -4.340460 | -4.000866 | 2.532740  |
| H | -5.109761 | -2.982734 | 3.774553  |
| H | -5.955732 | -3.349123 | 2.268543  |
| H | -2.393127 | 1.841216  | 3.191866  |
| H | -3.282289 | 3.924036  | 4.362807  |
| H | -1.744255 | 3.315007  | 5.008498  |
| H | -1.763395 | 4.737934  | 3.967412  |
| H | -0.112590 | 3.668527  | 2.286320  |
| H | 0.008946  | 2.338544  | 3.447450  |
| H | -0.375543 | 2.001489  | 1.755687  |
| H | -2.093875 | 5.313316  | 1.854014  |
| H | -3.324068 | 6.154246  | -0.114610 |
| H | -4.766210 | 4.627502  | -1.410824 |
| H | -4.994652 | 0.962650  | -0.793466 |
| H | -7.096040 | 3.170731  | -0.603254 |
| H | -7.413282 | 1.485462  | -1.060354 |
| H | -6.836941 | 1.869230  | 0.570628  |
| H | -4.198076 | 2.220380  | -2.864542 |
| H | -5.795777 | 1.461319  | -3.021744 |
| H | -5.666939 | 3.202276  | -2.778110 |
| H | -5.979667 | -1.863967 | 0.162301  |
| H | -7.291130 | -4.000640 | 0.569421  |
| H | -8.213862 | -2.728614 | -0.253997 |
| H | -7.591291 | -4.105392 | -1.168144 |
| H | -6.285375 | -2.557656 | -2.800329 |
| H | -7.086266 | -1.221772 | -1.953237 |
| H | -5.321007 | -1.233671 | -2.139970 |
| H | -5.669391 | -4.886254 | -2.010111 |
| H | -3.723491 | -6.408391 | -2.002859 |
| H | -1.789957 | -5.923769 | -0.545901 |
| H | -1.500155 | -2.898709 | 1.631363  |
| H | -1.299104 | -5.942285 | 1.890233  |
| H | -0.543200 | -4.750983 | 2.962948  |
| H | -2.307150 | -4.889483 | 2.894838  |
| H | -0.042212 | -3.192087 | -0.407763 |
| H | 0.759148  | -3.685471 | 1.088713  |
| H | 0.130250  | -4.910104 | -0.017813 |
| H | 2.028854  | 1.167984  | 2.778971  |
| H | 3.245083  | -0.051610 | 3.013596  |
| H | 0.292408  | -0.605237 | 2.400413  |
| H | 1.508728  | -1.853406 | 2.575136  |
| H | 0.763648  | 0.168696  | 4.746973  |
| H | 1.970307  | -1.094300 | 4.912336  |
| H | 0.190894  | -2.839298 | 4.563204  |
| H | -1.018609 | -1.572862 | 4.404105  |

|   |           |           |           |
|---|-----------|-----------|-----------|
| H | 0.688322  | -2.075335 | 6.897892  |
| H | -0.511735 | -0.803793 | 6.742551  |
| H | -1.113745 | -3.820512 | 6.589724  |
| H | -1.465548 | -2.767904 | 7.969231  |
| H | -2.321615 | -2.536565 | 6.436533  |
| H | 6.366526  | -1.818124 | -2.090852 |
| H | 7.439814  | -0.757492 | -1.175676 |
| H | 6.956547  | -0.299588 | -2.804480 |
| H | 6.423004  | 1.701863  | -2.049279 |
| H | 4.949080  | 4.375435  | -1.739873 |
| H | 6.577554  | 3.752267  | -1.445876 |
| H | 5.627862  | 4.458708  | -0.118777 |
| H | 2.770359  | -1.285356 | -2.459906 |
| H | 4.865108  | -1.126672 | -3.731605 |
| H | 3.551694  | -1.546488 | -4.832902 |
| H | 4.690963  | -2.797424 | -4.299772 |
| H | 2.434120  | -3.992583 | -3.852915 |
| H | 1.447949  | -2.541493 | -4.021384 |
| H | 1.413888  | -3.458300 | -2.503273 |
| H | 3.633419  | -4.852027 | -2.300815 |
| H | 4.764654  | -5.923718 | -0.389409 |
| H | 5.671635  | -4.527976 | 1.438097  |
| H | 5.434725  | -0.809487 | 1.553594  |
| H | 7.549041  | -3.001586 | 1.908082  |
| H | 7.627421  | -1.361334 | 2.573132  |
| H | 7.688777  | -1.615070 | 0.820313  |
| H | 4.009095  | -2.262134 | 3.035152  |
| H | 5.456630  | -1.647472 | 3.853612  |
| H | 5.400544  | -3.327262 | 3.305253  |
| H | 5.013746  | 1.634200  | 2.193916  |
| H | 6.796741  | 3.197493  | 1.487754  |
| H | 7.299661  | 2.307007  | 2.932845  |
| H | 6.757498  | 3.991031  | 3.071959  |
| H | 5.165246  | 3.039745  | 4.915456  |
| H | 5.595171  | 1.374077  | 4.531723  |
| H | 3.900123  | 1.883749  | 4.442795  |
| H | 4.155730  | 4.725292  | 4.055053  |
| H | 2.581878  | 6.442901  | 3.237503  |
| H | 1.659932  | 6.271682  | 0.948666  |
| H | 2.567548  | 3.588959  | -1.480571 |
| H | 1.820223  | 6.559372  | -1.301831 |
| H | 2.028739  | 5.588217  | -2.764191 |
| H | 3.428138  | 5.976129  | -1.741947 |
| H | 0.386801  | 3.189030  | -0.386650 |
| H | 0.177955  | 4.091184  | -1.895803 |
| H | 0.066815  | 4.928907  | -0.335617 |
| H | -2.190034 | -1.499625 | -1.506366 |
| H | -2.678377 | 0.109600  | -2.148284 |
| H | -1.467883 | -0.518856 | -4.288280 |
| H | -3.469823 | -2.662656 | -3.402798 |
| H | -3.893468 | -1.125424 | -4.150151 |
| H | -2.582219 | -1.762405 | -6.197971 |
| H | -2.169851 | -3.299462 | -5.453006 |
| H | -5.018783 | -2.364651 | -6.087511 |
| H | -4.603586 | -3.900511 | -5.341729 |
| H | -3.732878 | -3.015549 | -8.160435 |
| H | -5.001894 | -4.195016 | -7.795433 |
| H | -3.312961 | -4.561396 | -7.410154 |
| H | -0.876508 | 0.177087  | -0.022716 |
| H | -1.740956 | 1.724361  | -3.472126 |

|   |           |           |           |
|---|-----------|-----------|-----------|
| H | -1.116458 | 3.287666  | -5.260437 |
| H | 1.278902  | 3.672286  | -5.808882 |
| H | 3.042466  | 2.500340  | -4.497274 |
| H | 2.423711  | 1.007043  | -2.649885 |
| H | -1.033425 | -2.053834 | -3.568162 |

199

[F4] scf done: -3873.562958 / Energies= -3871.705879 / Enthalpies= -3871.704935 /

Free Energies= -3871.977887

|    |           |           |           |
|----|-----------|-----------|-----------|
| C  | -4.009405 | 2.956418  | 1.656821  |
| C  | -4.023925 | 1.624011  | 2.130182  |
| C  | -2.928501 | 1.107299  | 2.860122  |
| C  | -1.838196 | 1.945149  | 3.113229  |
| C  | -1.816146 | 3.259893  | 2.661326  |
| C  | -2.894934 | 3.753195  | 1.936126  |
| N  | -5.115303 | 0.763026  | 1.785563  |
| C  | -6.165086 | 0.660443  | 2.600005  |
| C  | -7.283590 | -0.161229 | 2.356682  |
| C  | -7.558421 | -1.028618 | 1.281522  |
| C  | -8.871223 | -1.777503 | 1.337263  |
| C  | -2.890541 | -0.337975 | 3.336467  |
| C  | -2.562255 | -0.462491 | 4.830521  |
| C  | -5.151114 | 3.525470  | 0.826452  |
| C  | -5.687448 | 4.850577  | 1.385030  |
| Mg | -4.943235 | -0.274080 | 0.030169  |
| N  | -6.744735 | -1.221684 | 0.243626  |
| C  | -7.114505 | -2.132925 | -0.796581 |
| C  | -6.703191 | -3.483771 | -0.721614 |
| C  | -7.001623 | -4.334569 | -1.790340 |
| C  | -7.686239 | -3.876750 | -2.910188 |
| C  | -8.079153 | -2.545022 | -2.975726 |
| C  | -7.805138 | -1.653824 | -1.934019 |
| C  | -5.917584 | -4.020270 | 0.466736  |
| C  | -6.551819 | -5.277971 | 1.076531  |
| C  | -8.219703 | -0.195251 | -2.065806 |
| C  | -9.706664 | -0.030439 | -2.408619 |
| C  | -4.454669 | -4.286536 | 0.077289  |
| C  | -7.342652 | 0.529130  | -3.099684 |
| C  | -6.185193 | 1.464050  | 3.881026  |
| C  | -1.901656 | -1.160557 | 2.494786  |
| C  | -4.727563 | 3.688847  | -0.642207 |
| C  | -2.215152 | -0.675920 | -4.835815 |
| C  | -1.911182 | -2.136760 | -5.194855 |
| C  | -3.160993 | -3.020335 | -5.217790 |
| C  | -2.869287 | -4.484787 | -5.548155 |
| C  | -4.122153 | -5.361523 | -5.583471 |
| C  | -3.823765 | -6.827250 | -5.892867 |
| Si | -0.712656 | 0.464661  | -4.834144 |
| C  | 0.093870  | 0.611431  | -6.528095 |
| C  | -0.384649 | 1.529246  | -7.478702 |
| C  | 0.183604  | 1.618715  | -8.748263 |
| C  | 1.249400  | 0.788675  | -9.095047 |
| C  | 1.743438  | -0.126862 | -8.166990 |
| C  | 1.170945  | -0.211174 | -6.898130 |
| C  | 1.498391  | 1.849125  | 0.097652  |
| C  | 2.381164  | 2.955780  | -0.501186 |
| C  | 1.659812  | 3.650221  | -1.663849 |
| C  | 2.834258  | 3.926897  | 0.579939  |
| C  | 4.148117  | 3.897334  | 1.103847  |
| C  | 4.531639  | 4.786839  | 2.134390  |
| C  | 3.585951  | 5.693927  | 2.622341  |

|    |            |           |           |
|----|------------|-----------|-----------|
| C  | 2.292781   | 5.733393  | 2.114565  |
| C  | 1.926704   | 4.853563  | 1.101906  |
| N  | 5.066445   | 2.897723  | 0.650722  |
| Mg | 5.032840   | 1.103043  | 1.661280  |
| C  | 3.987766   | 0.527627  | 3.417391  |
| C  | 3.776240   | -0.962372 | 3.723494  |
| C  | 3.060156   | -1.240966 | 5.051583  |
| C  | 2.854690   | -2.727417 | 5.348559  |
| C  | 2.141929   | -2.999972 | 6.674460  |
| C  | 1.944963   | -4.487539 | 6.960585  |
| C  | 5.930627   | 4.772514  | 2.734192  |
| C  | 6.619961   | 6.141383  | 2.638952  |
| C  | 5.861811   | 3.149627  | -0.387101 |
| C  | 5.785163   | 4.498180  | -1.068581 |
| C  | 6.788571   | 2.231715  | -0.919841 |
| C  | 7.060356   | 0.899618  | -0.554610 |
| C  | 8.115406   | 0.182526  | -1.367787 |
| N  | 6.451152   | 0.250209  | 0.437191  |
| C  | 6.773645   | -1.118879 | 0.700464  |
| C  | 6.049945   | -2.146230 | 0.050122  |
| C  | 6.309955   | -3.474057 | 0.401779  |
| C  | 7.257182   | -3.795045 | 1.367154  |
| C  | 7.965630   | -2.777891 | 1.996041  |
| C  | 7.744727   | -1.433976 | 1.679376  |
| C  | 4.983257   | -1.843040 | -0.992924 |
| C  | 3.577054   | -2.124996 | -0.441655 |
| C  | 8.534131   | -0.353515 | 2.404953  |
| C  | 10.050690  | -0.572676 | 2.310772  |
| C  | 8.095131   | -0.238129 | 3.873097  |
| C  | 5.206962   | -2.608326 | -2.304841 |
| C  | 5.905659   | 4.283565  | 4.190559  |
| H  | -1.123044  | 1.828218  | -4.391940 |
| H  | 0.314235   | -0.051942 | -3.882750 |
| H  | -6.075190  | 2.533727  | 3.672549  |
| H  | -7.113383  | 1.308479  | 4.435062  |
| H  | -5.343605  | 1.185940  | 4.525265  |
| H  | -8.052137  | -0.123284 | 3.120197  |
| H  | -8.701137  | -2.859853 | 1.341064  |
| H  | -9.444855  | -1.512178 | 2.227905  |
| H  | -9.478905  | -1.562460 | 0.451464  |
| H  | -3.888258  | -0.765173 | 3.185824  |
| H  | -3.252851  | 0.124436  | 5.446692  |
| H  | -2.631836  | -1.509772 | 5.147964  |
| H  | -1.545203  | -0.120743 | 5.053886  |
| H  | -0.878588  | -0.784576 | 2.613966  |
| H  | -1.911496  | -2.213473 | 2.802340  |
| H  | -2.142411  | -1.113352 | 1.425799  |
| H  | -0.987299  | 1.560197  | 3.669908  |
| H  | -0.957164  | 3.892780  | 2.869142  |
| H  | -2.871020  | 4.778916  | 1.575294  |
| H  | -5.975127  | 2.803445  | 0.855072  |
| H  | -4.938242  | 5.649047  | 1.329652  |
| H  | -6.560023  | 5.180308  | 0.808419  |
| H  | -5.991589  | 4.753392  | 2.433269  |
| H  | -4.373267  | 2.743175  | -1.069653 |
| H  | -5.566633  | 4.047590  | -1.251169 |
| H  | -3.909729  | 4.413634  | -0.736015 |
| H  | -8.054299  | 0.286980  | -1.095767 |
| H  | -10.348426 | -0.542232 | -1.682615 |
| H  | -9.980172  | 1.031495  | -2.412302 |

|   |           |           |           |
|---|-----------|-----------|-----------|
| H | -9.942433 | -0.432113 | -3.400938 |
| H | -7.477917 | 0.098013  | -4.099117 |
| H | -7.604376 | 1.593163  | -3.153679 |
| H | -6.277158 | 0.449960  | -2.853252 |
| H | -8.606390 | -2.187471 | -3.857144 |
| H | -7.908394 | -4.554125 | -3.730865 |
| H | -6.687974 | -5.374944 | -1.745358 |
| H | -5.917272 | -3.246915 | 1.242930  |
| H | -6.530534 | -6.123552 | 0.379129  |
| H | -6.002818 | -5.581623 | 1.975887  |
| H | -7.596703 | -5.107526 | 1.359531  |
| H | -3.973476 | -3.387544 | -0.326003 |
| H | -3.876484 | -4.624324 | 0.946178  |
| H | -4.389615 | -5.064169 | -0.693371 |
| H | 3.006875  | 1.033813  | 3.409876  |
| H | 4.517842  | 0.983812  | 4.273346  |
| H | 3.196528  | -1.436712 | 2.916015  |
| H | 4.741496  | -1.491694 | 3.733543  |
| H | 2.084769  | -0.730209 | 5.045792  |
| H | 3.635693  | -0.781166 | 5.869971  |
| H | 3.831385  | -3.235204 | 5.352368  |
| H | 2.280268  | -3.186255 | 4.528952  |
| H | 2.715153  | -2.542169 | 7.493599  |
| H | 1.165311  | -2.494690 | 6.670366  |
| H | 2.907342  | -5.012884 | 7.002104  |
| H | 1.435081  | -4.651333 | 7.917392  |
| H | 1.343743  | -4.965456 | 6.176884  |
| H | 7.684285  | -0.677109 | -1.892911 |
| H | 8.904746  | -0.213453 | -0.719803 |
| H | 8.568918  | 0.847235  | -2.106241 |
| H | 7.370602  | 2.603798  | -1.755165 |
| H | 4.788044  | 4.658901  | -1.494083 |
| H | 6.521098  | 4.581345  | -1.871251 |
| H | 5.951976  | 5.310408  | -0.353316 |
| H | 5.037175  | -0.773791 | -1.225213 |
| H | 6.207264  | -2.427490 | -2.714074 |
| H | 4.472059  | -2.295548 | -3.056123 |
| H | 5.095775  | -3.690528 | -2.168616 |
| H | 3.456588  | -3.186858 | -0.194793 |
| H | 2.809784  | -1.860684 | -1.179462 |
| H | 3.379891  | -1.554225 | 0.473043  |
| H | 5.755639  | -4.271939 | -0.087058 |
| H | 7.442187  | -4.833976 | 1.628657  |
| H | 8.705955  | -3.031489 | 2.751373  |
| H | 8.312842  | 0.602645  | 1.917237  |
| H | 10.362562 | -1.485395 | 2.832118  |
| H | 10.585679 | 0.266839  | 2.770887  |
| H | 10.382954 | -0.655621 | 1.269800  |
| H | 7.021425  | -0.034623 | 3.958696  |
| H | 8.637635  | 0.571246  | 4.377401  |
| H | 8.296208  | -1.168126 | 4.418709  |
| H | 6.532393  | 4.061941  | 2.156548  |
| H | 6.657356  | 6.505676  | 1.606265  |
| H | 7.649365  | 6.076837  | 3.011696  |
| H | 6.099956  | 6.898239  | 3.238003  |
| H | 5.326699  | 4.964574  | 4.826194  |
| H | 6.923027  | 4.229366  | 4.597735  |
| H | 5.450062  | 3.290653  | 4.273193  |
| H | 3.868893  | 6.382064  | 3.415892  |
| H | 1.573093  | 6.448440  | 2.505924  |

|   |           |           |            |
|---|-----------|-----------|------------|
| H | 0.913664  | 4.883817  | 0.708412   |
| H | 3.275631  | 2.475938  | -0.913859  |
| H | 0.702805  | 4.083424  | -1.350872  |
| H | 1.443259  | 2.927717  | -2.459023  |
| H | 2.266992  | 4.455895  | -2.092279  |
| H | 2.016256  | 1.309493  | 0.900458   |
| H | 1.210272  | 1.122686  | -0.671641  |
| H | 0.579852  | 2.265676  | 0.527420   |
| H | -2.679363 | -0.620752 | -3.839837  |
| H | -2.955701 | -0.265308 | -5.538634  |
| H | -1.417354 | -2.185857 | -6.176166  |
| H | -3.663840 | -2.958315 | -4.241962  |
| H | -3.873068 | -2.615693 | -5.952827  |
| H | -2.356167 | -4.546540 | -6.519881  |
| H | -2.164152 | -4.891326 | -4.807212  |
| H | -4.820046 | -4.963022 | -6.333945  |
| H | -4.641760 | -5.285965 | -4.617870  |
| H | -3.330214 | -6.934104 | -6.866918  |
| H | -4.739898 | -7.429000 | -5.917163  |
| H | -3.158532 | -7.264398 | -5.137730  |
| H | -3.742100 | -0.334516 | -1.205178  |
| H | -1.210258 | 2.191917  | -7.223284  |
| H | -0.201911 | 2.338830  | -9.466318  |
| H | 1.696043  | 0.858463  | -10.084042 |
| H | 2.577740  | -0.773039 | -8.430034  |
| H | 1.574664  | -0.925908 | -6.183038  |
| H | -1.193224 | -2.549938 | -4.471056  |



## References

1. S. J. Bonyhady, C. Jones, S. Nembenma, A. Stasch, A. J. Edwards, G. J. McIntyre, *Chem. Eur. J.*, **2010**, *16*, 938.
2. Dolomanov, O. V., Bourhis, L. J., Gildea, R. J., Howard, J. A. K. & Puschmann, H., *J. Appl. Cryst.*, **2009**, *42*, 339.
3. Bourhis, L. J., Dolomanov, O. V., Gildea, R. J., Howard, J. A. K. & Puschmann, H., *Acta Cryst.*, **2015**, *A71*, 59.
4. Sheldrick, G. M., *Acta Cryst.*, **2015**, *C71*, 3.
5. Gaussian09, revision D.01. Frisch, M. J.; Trucks, G. W.; Schlegel, H. B.; Scuseria, G. E.; Robb, M. A.; Cheeseman, J. R.; Scalmani, G.; Barone, V.; Mennucci, B.; Petersson, G. A.; Nakatsuji, H.; Caricato, M.; Li, X.; Hratchian, H. P.; Izmaylov, A. F.; Bloino, J.; Zheng, G.; Sonnenberg, J. L.; Hada, M.; Ehara, M.; Toyota, K.; Fukuda, R.; Hasegawa, J.; Ishida, M.; Nakajima, T.; Honda, Y.; Kitao, O.; Nakai, H.; Vreven, T.; Montgomery, Jr., J. A.; Peralta, J. E.; Ogliaro, F.; Bearpark, M.; Heyd, J. J.; Brothers, E.; Kudin, K. N.; Staroverov, V. N.; Keith, T.; Kobayashi, R.; Normand, J.; Raghavachari, K.; Rendell, A.; Burant, J. C.; Iyengar, S. S.; Tomasi, J.; Cossi, M.; Rega, N.; Millam, J. M.; Klene, M.; Knox, J. E.; Cross, J. B.; Bakken, V.; Adamo, C.; Jaramillo, J.; Gomperts, R.; Stratmann, R. E.; Yazyev, O.; Austin, A. J.; Cammi, R.; Pomelli, C.; Ochterski, J. W.; Martin, R. L.; Morokuma, K.; Zakrzewski, V. G.; Voth, G. A.; Salvador, P.; Dannenberg, J. J.; Dapprich, S.; Daniels, A. D.; Farkas, O.; Foresman, J. B.; Ortiz, J. V.; Cioslowski, J.; Fox, D. J.; Gaussian, Inc., Wallingford CT, **2013**.
6. (a) J. P. Perdew, J. A. Chevary, S. H. Vosko, K. A. Jackson, M. R. Pederson, D. J. Singh, C. Fiolhais, *Phys. Rev. B* **1992**, *46*, 6671; (b) A. D. Becke, *J. Chem. Phys.* **1993**, *98*, 5648.
